# Supplementary material
Source: publisher figshare collection journal article supplement (https://gsajournals.figshare.com/ndownloader/files/22441127)
Supplement: Supplementary file 1 [file 22441127]

## Sheet: Plan1
							Normalized count for each Biological replicate
Gene	baseMean	log2FoldChange	lfcSE	stat	pvalue	padj	ManiBL_Mani_1.1	ManiBL_Mani_1.2	ManiBL_Mani_1.3	ManiBL_Mani_3.2	ManiH_Mani_H1	ManiH_Mani_H3	ManiH_Mani_H4	ManiH_Mani_H5	Protein product	Length	Protein name	Gene names	Entry	Entry name	Status	Protein names	Organism	Length2	Gene ontology IDs	Gene ontology (GO)	Cross-reference (Pfam)	Signal peptide	Annotation	Cross-reference (KEGG)	EnsemblFungi transcript	KEGG_ENZYME
MAN_06392	9429.29	11.1558	0.261652	42.6361	0	0	18639.8	19349.1	18678.6	18733.8	9.20968	8.59266	8.04055	7.21697	KID64218.1	385	hypothetical protein MAN_06392, partial	MAN_06392	A0A0B4F1A2	A0A0B4F1A2_METAN	unreviewed	Uncharacterized protein (Fragment)	Metarhizium anisopliae ARSEF 549	385	NULL	NULL	NULL	NULL	1 out of 5	NULL	KID64218;	NULL
MAN_09398	11634	11.1004	0.241797	45.9081	0	0	21526.5	22431.4	25952.8	23118.2	9.20968	18.2594	9.04562	6.18598	KID61114.1	276	UbiA prenyltransferase family, partial	MAN_09398	A0A0B4FXX1	A0A0B4FXX1_METAN	unreviewed	UbiA prenyltransferase family (Fragment)	Metarhizium anisopliae ARSEF 549	276	GO:0016021; GO:0016765	integral component of membrane [GO:0016021]; transferase activity, transferring alkyl or aryl (other than methyl) groups [GO:0016765]	PF01040;	NULL	1 out of 5	NULL	KID61114;	NULL
MAN_09391	20394.5	11.0782	0.183646	60.3238	0	0	39587.5	39544.6	43665.6	40282.7	14.3262	29.0002	20.1014	12.372	KID61107.1	452	alpha/beta hydrolase, partial	MAN_09391	A0A0B4EZR8	A0A0B4EZR8_METAN	unreviewed	Alpha/beta hydrolase (Fragment)	Metarhizium anisopliae ARSEF 549	452	GO:0016787	hydrolase activity [GO:0016787]	PF12697;	NULL	1 out of 5	NULL	KID61107;	NULL
MAN_06393	13176.7	10.8817	0.218363	49.8332	0	0	28394.5	28096.4	24145.9	24720.5	10.233	26.8521	8.04055	11.341	KID64219.1	626	WSC domain containing protein, partial	MAN_06393	A0A0B4G747	A0A0B4G747_METAN	unreviewed	WSC domain containing protein (Fragment)	Metarhizium anisopliae ARSEF 549	626	NULL	NULL	PF01822;	NULL	1 out of 5	NULL	KID64219;	NULL
MAN_09385	11848.7	10.7574	0.213093	50.4823	0	0	22640.4	22373.2	25664.5	24057.1	17.3961	12.889	17.0862	7.21697	KID61101.1	726	acetate-CoA ligase, partial	MAN_09385	A0A0B4F5H2	A0A0B4F5H2_METAN	unreviewed	Acetate-CoA ligase (Fragment)	Metarhizium anisopliae ARSEF 549	726	GO:0008152; GO:0016874	ligase activity [GO:0016874]; metabolic process [GO:0008152]	PF16177;PF00501;PF13193;	NULL	1 out of 5	NULL	KID61101;	K01908
MAN_09395	11120.1	10.7493	0.215008	49.9951	0	0	21824.8	22457.7	23321.1	21305.5	9.20968	19.3335	16.0811	7.21697	KID61111.1	267	phytanoyl-CoA dioxygenase family protein, partial	MAN_09395	A0A0B4F5I0	A0A0B4F5I0_METAN	unreviewed	Phytanoyl-CoA dioxygenase family protein (Fragment)	Metarhizium anisopliae ARSEF 549	267	GO:0051213	dioxygenase activity [GO:0051213]	PF05721;	NULL	1 out of 5	NULL	KID61111;	NULL
MAN_09381	19100.7	10.5885	0.158223	66.9217	0	0	37558.5	38177.7	39104.9	37864.9	25.5824	32.2225	22.1115	19.5889	KID61097.1	247	Glutathione S-transferase protein, partial	MAN_09381	A0A0B4EZR0	A0A0B4EZR0_METAN	unreviewed	Glutathione S-transferase protein (Fragment)	Metarhizium anisopliae ARSEF 549	247	GO:0016740	transferase activity [GO:0016740]	PF00043;PF02798;	NULL	1 out of 5	NULL	KID61097;	K03233
MAN_02861	21896.1	9.30889	0.107582	86.528	0	0	44088.6	44571.6	44737.2	41495.5	65.491	73.0376	75.3802	61.8598	KID68005.1	250	NAD(P)-binding domain protein, partial	MAN_02861	A0A0B4F1F0	A0A0B4F1F0_METAN	unreviewed	NAD(P)-binding domain protein (Fragment)	Metarhizium anisopliae ARSEF 549	250	NULL	NULL	NULL	NULL	1 out of 5	NULL	KID68005;	NULL
MAN_10647	4762.99	8.90227	0.180599	49.2932	0	0	9235.64	9670.78	9758.59	9359.95	18.4194	15.0372	35.1774	10.31	KID59477.1	426	metalloprotease MEP1, partial	MAN_10647	A0A0B4EUR5	A0A0B4EUR5_METAN	unreviewed	Metalloprotease MEP1 (Fragment)	Metarhizium anisopliae ARSEF 549	426	GO:0008237	metallopeptidase activity [GO:0008237]	PF05572;	SIGNAL 1 20 {ECO:0000256|SAM:SignalP}.	1 out of 5	NULL	KID59477;	NULL
MAN_00992	16483.3	8.81625	0.148476	59.3784	0	0	34662.5	33060.5	32398.5	31452.2	92.0968	96.6674	53.2686	50.5188	KID71393.1	82	pantothenate transporter liz1, partial	MAN_00992	A0A0B4FLT1	A0A0B4FLT1_METAN	unreviewed	Pantothenate transporter liz1 (Fragment)	Metarhizium anisopliae ARSEF 549	82	NULL	NULL	NULL	NULL	1 out of 5	NULL	KID71393;	NULL
MAN_00814	19932.7	8.63905	0.134694	64.1384	0	0	38657.2	37916.5	42965.5	39522.9	135.075	102.038	69.3497	92.7896	KID71215.1	457	UDP-glucuronosyl/UDP-glucosyltransferase, partial	MAN_00814	A0A0B4FAT6	A0A0B4FAT6_METAN	unreviewed	UDP-glucuronosyl/UDP-glucosyltransferase (Fragment)	Metarhizium anisopliae ARSEF 549	457	GO:0008152; GO:0016758	transferase activity, transferring hexosyl groups [GO:0016758]; metabolic process [GO:0008152]	PF00201;	NULL	1 out of 5	NULL	KID71215;	NULL
MAN_07719	5235.91	8.28333	0.160747	51.5303	0	0	11101.1	10883.6	9515.57	10253.7	42.9785	18.2594	45.2281	26.8059	KID63518.1	647	collagen-like protein Mcl1, partial	MAN_07719	A0A0B4EZF1	A0A0B4EZF1_METAN	unreviewed	Collagen-like protein Mcl1 (Fragment)	Metarhizium anisopliae ARSEF 549	647	NULL	NULL	NULL	SIGNAL 1 19 {ECO:0000256|SAM:SignalP}.	1 out of 5	NULL	KID63518;	NULL
MAN_08053	3170.56	8.104	0.174588	46.4178	0	0	6713.77	6479.44	5997.44	6082.31	12.2796	18.2594	33.1673	27.8369	KID62837.1	363	Alternative oxidase, partial	MAN_08053	A0A0B4F4W2	A0A0B4F4W2_METAN	unreviewed	Alternative oxidase (EC 1.-.-.-) (Fragment)	Metarhizium anisopliae ARSEF 549	363	GO:0009916; GO:0016021; GO:0046872; GO:0070469	integral component of membrane [GO:0016021]; respiratory chain [GO:0070469]; alternative oxidase activity [GO:0009916]; metal ion binding [GO:0046872]	PF01786;	NULL	2 out of 5	NULL	KID62837;	NULL
MAN_01712	11069.6	8.05056	0.11272	71.4209	0	0	21572.9	21098.3	23129.7	22422.7	101.306	87.0007	60.3041	84.5417	KID69198.1	585	myosin-cross-reactive antigen-like protein, partial	MAN_01712	A0A0B4FFG2	A0A0B4FFG2_METAN	unreviewed	Myosin-cross-reactive antigen-like protein (Fragment)	Metarhizium anisopliae ARSEF 549	585	GO:0006631; GO:0016491; GO:0050151; GO:0071949	FAD binding [GO:0071949]; oleate hydratase activity [GO:0050151]; oxidoreductase activity [GO:0016491]; fatty acid metabolic process [GO:0006631]	PF06100;	NULL	1 out of 5	NULL	KID69198;	NULL
MAN_02726	0	NA	NA	NA	NA	NA	0	0	0	0	0	0	0	0	KID70212.1	139	polyketide synthase, partial	MAN_02726	A0A0B4FR43	A0A0B4FR43_METAN	unreviewed	Polyketide synthase (Fragment)	Metarhizium anisopliae ARSEF 549	139	NULL	NULL	NULL	NULL	1 out of 5	NULL	KID70212;	NULL
MAN_04666	10637.1	7.81259	0.0997778	78.2999	0	0	20806.9	20469.8	22600.9	20843	92.0968	84.8525	99.5018	100.007	KID66385.1	531	3-hydroxyphenylacetate 6 hydroxylase, partial	MAN_04666	A0A0B4EWR9	A0A0B4EWR9_METAN	unreviewed	3-hydroxyphenylacetate 6 hydroxylase (Fragment)	Metarhizium anisopliae ARSEF 549	531	GO:0005506; GO:0016705; GO:0020037	heme binding [GO:0020037]; iron ion binding [GO:0005506]; oxidoreductase activity, acting on paired donors, with incorporation or reduction of molecular oxygen [GO:0016705]	PF00067;	NULL	1 out of 5	NULL	KID66385;	K10438
MAN_00980	2526.2	7.53463	0.15841	47.564	0	0	4924.95	4857	5184.02	5135.54	29.6756	17.1853	24.1216	37.1159	KID71381.1	110	hypothetical protein MAN_00980, partial	MAN_00980	A0A0B4G095	A0A0B4G095_METAN	unreviewed	Uncharacterized protein (Fragment)	Metarhizium anisopliae ARSEF 549	110	NULL	NULL	NULL	NULL	1 out of 5	NULL	KID71381;	NULL
MAN_07483	2672.53	7.32968	0.150506	48.7002	0	0	5241.76	5203.66	5550.43	5252.91	42.9785	16.1112	32.1622	40.2088	KID63282.1	458	reductase, partial	MAN_07483	A0A0B4F657	A0A0B4F657_METAN	unreviewed	Reductase (Fragment)	Metarhizium anisopliae ARSEF 549	458	GO:0016021; GO:0016491; GO:0020037; GO:0046872	integral component of membrane [GO:0016021]; heme binding [GO:0020037]; metal ion binding [GO:0046872]; oxidoreductase activity [GO:0016491]	PF00173;PF00970;PF00175;	NULL	1 out of 5	NULL	KID63282;	K00326
MAN_06741	5399.99	7.3001	0.122596	59.5462	0	0	10671.4	10157.4	10976.2	11123.1	88.0036	47.2596	63.3193	73.2007	KID64567.1	468	prolyl aminopeptidase (secreted protein), partial	MAN_06741	A0A0B4FA33	A0A0B4FA33_METAN	unreviewed	Prolyl aminopeptidase (Secreted protein) (Fragment)	Metarhizium anisopliae ARSEF 549	468	GO:0004177; GO:0004806; GO:0016042	aminopeptidase activity [GO:0004177]; triglyceride lipase activity [GO:0004806]; lipid catabolic process [GO:0016042]	PF03583;	SIGNAL 1 18 {ECO:0000256|SAM:SignalP}.	1 out of 5	NULL	KID64567;	NULL
MAN_05704	47887.5	7.15772	0.10846	65.9941	0	0	98777.8	96882.5	89519.6	95254.8	777.706	737.895	613.092	536.118	KID66045.1	419	flavohemoglobin, partial	MAN_05704	A0A0B4EVX1	A0A0B4EVX1_METAN	unreviewed	Flavohemoglobin (Fragment)	Metarhizium anisopliae ARSEF 549	419	GO:0016491; GO:0020037	heme binding [GO:0020037]; oxidoreductase activity [GO:0016491]	PF00042;PF00175;	NULL	1 out of 5	NULL	KID66045;	K05916
MAN_00671	4750.78	7.14483	0.118129	60.483	0	0	9578.58	10064.4	9047.16	9048.7	56.2814	82.7043	59.2991	69.0767	KID71072.1	1083	Concanavalin A-like lectin/glucanase, partial	MAN_00671	A0A0B4FTP1	A0A0B4FTP1_METAN	unreviewed	Concanavalin A-like lectin/glucanase (Fragment)	Metarhizium anisopliae ARSEF 549	1083	GO:0004553; GO:0005975; GO:0030246	carbohydrate binding [GO:0030246]; hydrolase activity, hydrolyzing O-glycosyl compounds [GO:0004553]; carbohydrate metabolic process [GO:0005975]	PF00722;PF01822;	NULL	1 out of 5	NULL	KID71072;	NULL
MAN_10677	6095.22	7.14405	0.133862	53.3688	0	0	11898.2	11807.1	12863.7	11849.9	108.47	104.186	69.3497	60.8288	KID59507.1	410	cytochrome P450, partial	MAN_10677	A0A0B4EUV3	A0A0B4EUV3_METAN	unreviewed	Cytochrome P450 (Fragment)	Metarhizium anisopliae ARSEF 549	410	GO:0004497; GO:0005506; GO:0016705; GO:0020037	heme binding [GO:0020037]; iron ion binding [GO:0005506]; monooxygenase activity [GO:0004497]; oxidoreductase activity, acting on paired donors, with incorporation or reduction of molecular oxygen [GO:0016705]	PF00067;	NULL	1 out of 5	NULL	KID59507;	K15877
MAN_09394	18562.5	6.99355	0.0831003	84.158	0	0	36014.9	36045.1	39052	36233.1	302.896	247.039	318.607	286.617	KID61110.1	308	phytanoyl-CoA dioxygenase, partial	MAN_09394	A0A0B4EG48	A0A0B4EG48_METAN	unreviewed	Phytanoyl-CoA dioxygenase (Fragment)	Metarhizium anisopliae ARSEF 549	308	GO:0051213	dioxygenase activity [GO:0051213]	PF05721;	NULL	1 out of 5	NULL	KID61110;	NULL
MAN_01976	6373.78	6.76332	0.10762	62.8447	0	0	12113.9	12243	13458	12709.7	138.145	129.964	101.512	95.8826	KID69462.1	525	succinyl-CoA:3-ketoacid-coenzyme A transferase, partial	MAN_01976	A0A0B4FNV9	A0A0B4FNV9_METAN	unreviewed	Succinyl-CoA:3-ketoacid-coenzyme A transferase (Fragment)	Metarhizium anisopliae ARSEF 549	525	GO:0008410; GO:0046952	CoA-transferase activity [GO:0008410]; ketone body catabolic process [GO:0046952]	PF01144;	NULL	1 out of 5	NULL	KID69462;	K01027
MAN_00815	31568	6.6512	0.102847	64.6709	0	0	59821.4	59449.8	68273.6	62510.6	672.306	667.005	492.484	656.745	KID71216.1	252	NRPS like protein, partial	MAN_00815	A0A0B4FZT4	A0A0B4FZT4_METAN	unreviewed	NRPS like protein (Fragment)	Metarhizium anisopliae ARSEF 549	252	NULL	NULL	PF05050;	NULL	1 out of 5	NULL	KID71216;	NULL
MAN_03630	3946.21	6.58482	0.106163	62.0255	0	0	7749.31	7487.48	8329.43	7677.66	80.8405	87.0007	72.3649	85.5727	KID68774.1	153	ribose 5-phosphate isomerase, partial	MAN_03630	A0A0B4GKE8	A0A0B4GKE8_METAN	unreviewed	Ribose 5-phosphate isomerase (Fragment)	Metarhizium anisopliae ARSEF 549	153	GO:0004751; GO:0005975	ribose-5-phosphate isomerase activity [GO:0004751]; carbohydrate metabolic process [GO:0005975]	PF02502;	NULL	1 out of 5	NULL	KID68774;	K01808
MAN_07137	6031.91	6.56026	0.104342	62.8724	0	0	11764.3	11176.7	12324.8	12483.7	116.656	113.853	117.593	157.742	KID63966.1	306	NmrA family transcriptional regulator, partial	MAN_07137	A0A0B4FDK2	A0A0B4FDK2_METAN	unreviewed	NmrA family transcriptional regulator (Fragment)	Metarhizium anisopliae ARSEF 549	306	NULL	NULL	PF05368;	NULL	1 out of 5	NULL	KID63966;	NULL
MAN_09393	5004.42	6.50184	0.14052	46.2698	0	0	9637.56	9626.63	10689.1	9645.11	154.518	103.112	82.4156	96.9136	KID61109.1	410	C6 finger transcription factor, partial	MAN_09393	A0A0B4FXW8	A0A0B4FXW8_METAN	unreviewed	C6 finger transcription factor (Fragment)	Metarhizium anisopliae ARSEF 549	410	NULL	NULL	NULL	NULL	1 out of 5	NULL	KID61109;	NULL
MAN_00026	4159.42	6.40383	0.148122	43.2336	0	0	8197.57	7904.6	8504.45	8281.02	138.145	67.6672	101.512	80.4177	KID70427.1	340	alcohol dehydrogenase, partial	MAN_00026	A0A0B4FRS8	A0A0B4FRS8_METAN	unreviewed	Alcohol dehydrogenase (Fragment)	Metarhizium anisopliae ARSEF 549	340	GO:0008270; GO:0016491	oxidoreductase activity [GO:0016491]; zinc ion binding [GO:0008270]	PF08240;PF00107;	NULL	1 out of 5	NULL	KID70427;	NULL
MAN_10795	1742.46	6.32015	0.142845	44.2447	0	0	3332.45	3390.5	3728.41	3316.76	49.1183	30.0743	55.2788	37.1159	KID59303.1	487	Homogentisate 1,2-dioxygenase, partial	MAN_10795	A0A0B4ELY3	A0A0B4ELY3_METAN	unreviewed	Homogentisate 1,2-dioxygenase (Fragment)	Metarhizium anisopliae ARSEF 549	487	GO:0004411; GO:0006559; GO:0006570	homogentisate 1,2-dioxygenase activity [GO:0004411]; L-phenylalanine catabolic process [GO:0006559]; tyrosine metabolic process [GO:0006570]	PF04209;	NULL	1 out of 5	NULL	KID59303;	K00451
MAN_03213	5652.04	6.30382	0.119889	52.5803	0	0	10983.2	10773.7	11692.7	11202.2	173.961	104.186	126.639	159.804	KID68357.1	487	Pyridine nucleotide-disulfide oxidoreductase, FAD/NAD(P)-binding domain protein, partial	MAN_03213	A0A0B4FKF9	A0A0B4FKF9_METAN	unreviewed	Pyridine nucleotide-disulfide oxidoreductase, FAD/NAD(P)-binding domain protein (Fragment)	Metarhizium anisopliae ARSEF 549	487	GO:0016491	oxidoreductase activity [GO:0016491]	PF07992;	NULL	1 out of 5	NULL	KID68357;	K03885
MAN_04367	8923.73	6.21337	0.070412	88.2431	0	0	17525.1	17203.4	17827.4	17884.4	241.498	244.891	227.146	236.098	KID67609.1	1088	nitrite reductase, partial	MAN_04367	A0A0B4GH56	A0A0B4GH56_METAN	unreviewed	Nitrite reductase (Fragment)	Metarhizium anisopliae ARSEF 549	1088	GO:0008942; GO:0020037; GO:0042128; GO:0050660; GO:0050661; GO:0051537	2 iron, 2 sulfur cluster binding [GO:0051537]; flavin adenine dinucleotide binding [GO:0050660]; heme binding [GO:0020037]; NADP binding [GO:0050661]; nitrite reductase [NAD(P)H] activity [GO:0008942]; nitrate assimilation [GO:0042128]	PF04324;PF01077;PF03460;PF07992;PF00355;	NULL	1 out of 5	NULL	KID67609;	K17877
MAN_04444	34566.8	6.1913	0.077353	80.0396	0	0	71145	69889.1	64924.2	66842.9	1012.04	861.414	856.319	1003.16	KID67686.1	589	phosphoenolpyruvate carboxykinase, partial	MAN_04444	A0A0B4FPQ9	A0A0B4FPQ9_METAN	unreviewed	Phosphoenolpyruvate carboxykinase (Fragment)	Metarhizium anisopliae ARSEF 549	589	GO:0004612; GO:0005524; GO:0006094; GO:0016301	ATP binding [GO:0005524]; kinase activity [GO:0016301]; phosphoenolpyruvate carboxykinase (ATP) activity [GO:0004612]; gluconeogenesis [GO:0006094]	PF01293;	NULL	1 out of 5	NULL	KID67686;	K01610
MAN_01083	2160.4	6.02759	0.153064	39.3795	0	0	4757.27	4548.86	3568.5	4147.9	88.0036	52.63	62.3143	57.7358	KID71484.1	279	Thiopurine S-methyltransferase, partial	MAN_01083	A0A0B4GTZ0	A0A0B4GTZ0_METAN	unreviewed	Thiopurine S-methyltransferase (Fragment)	Metarhizium anisopliae ARSEF 549	279	GO:0008757	S-adenosylmethionine-dependent methyltransferase activity [GO:0008757]	PF05724;	NULL	1 out of 5	NULL	KID71484;	NULL
MAN_06296	5709.63	5.9384	0.0998977	59.4448	0	0	11169.4	10616.8	11802.2	11355.2	214.892	196.557	150.76	171.145	KID65285.1	621	Lysophospholipase, catalytic domain protein, partial	MAN_06296	A0A0B4ETM9	A0A0B4ETM9_METAN	unreviewed	Lysophospholipase (EC 3.1.1.5) (Fragment)	Metarhizium anisopliae ARSEF 549	621	GO:0004622; GO:0009395	lysophospholipase activity [GO:0004622]; phospholipid catabolic process [GO:0009395]	PF01735;	NULL	1 out of 5	NULL	KID65285;	K13333
MAN_04037	1910.3	5.92689	0.121311	48.8569	0	0	3782.39	3739.98	3824.11	3687.99	51.1649	83.7784	55.2788	57.7358	KID67279.1	201	DUF967 domain protein, partial	MAN_04037	A0A0B4GG89	A0A0B4GG89_METAN	unreviewed	DUF967 domain protein (Fragment)	Metarhizium anisopliae ARSEF 549	201	NULL	NULL	PF03928;	NULL	1 out of 5	NULL	KID67279;	NULL
MAN_03629	4624.49	5.8045	0.0914073	63.5015	0	0	8911.24	8612.95	9820.29	9001.75	169.867	147.149	173.877	158.773	KID68773.1	591	dihydroxyacetone kinase, partial	MAN_03629	A0A0B4FE82	A0A0B4FE82_METAN	unreviewed	Dihydroxyacetone kinase (Fragment)	Metarhizium anisopliae ARSEF 549	591	GO:0004371; GO:0005524; GO:0006071	ATP binding [GO:0005524]; glycerone kinase activity [GO:0004371]; glycerol metabolic process [GO:0006071]	PF02733;PF02734;	NULL	1 out of 5	NULL	KID68773;	K00863
MAN_09802	8532.72	5.78966	0.0917136	63.1275	0	0	17466.1	17962.4	15655.3	15966.5	337.688	261.002	306.546	306.206	KID60667.1	494	aldehyde dehydrogenase, partial	MAN_09802	A0A0B4EYC0	A0A0B4EYC0_METAN	unreviewed	Aldehyde dehydrogenase (Fragment)	Metarhizium anisopliae ARSEF 549	494	GO:0016491	oxidoreductase activity [GO:0016491]	PF00171;	NULL	1 out of 5	NULL	KID60667;	K00128
MAN_08523	3662.91	5.73258	0.095801	59.8384	0	0	7283.36	6645.73	7529.85	7303.82	137.122	128.89	150.76	123.72	KID61844.1	491	arrestin, partial	MAN_08523	A0A0B4G045	A0A0B4G045_METAN	unreviewed	Arrestin (Fragment)	Metarhizium anisopliae ARSEF 549	491	NULL	NULL	NULL	NULL	1 out of 5	NULL	KID61844;	NULL
MAN_04152	1674.86	5.61505	0.1329	42.2502	0	0	3374.58	3280.59	3341.85	3133.31	72.6541	90.2229	58.294	47.4258	KID67394.1	478	Amino acid transporter, transmembrane, partial	MAN_04152	A0A0B4GGI6	A0A0B4GGI6_METAN	unreviewed	Amino acid transporter, transmembrane (Fragment)	Metarhizium anisopliae ARSEF 549	478	GO:0016021	integral component of membrane [GO:0016021]	PF01490;	NULL	1 out of 5	NULL	KID67394;	NULL
MAN_07307	1379.83	5.57872	0.12319	45.2854	0	0	2778.02	2812.74	2616.56	2604.72	47.0717	64.4449	55.2788	59.7978	KID63106.1	177	Major facilitator superfamily domain, general substrate transporter, partial	MAN_07307	A0A0B4FBH5	A0A0B4FBH5_METAN	unreviewed	Major facilitator superfamily domain, general substrate transporter (Fragment)	Metarhizium anisopliae ARSEF 549	177	GO:0016021	integral component of membrane [GO:0016021]	NULL	NULL	1 out of 5	NULL	KID63106;	NULL
MAN_07308	1443.4	5.46255	0.123135	44.3624	0	0	2882.5	2822.13	2760.11	2826.42	80.8405	54.7782	49.2484	71.1387	KID63107.1	281	Major facilitator superfamily domain, general substrate transporter, partial	MAN_07308	A0A0B4F5S3	A0A0B4F5S3_METAN	unreviewed	Major facilitator superfamily domain, general substrate transporter (Fragment)	Metarhizium anisopliae ARSEF 549	281	GO:0016021; GO:0055085	integral component of membrane [GO:0016021]; transmembrane transport [GO:0055085]	PF07690;	NULL	1 out of 5	NULL	KID63107;	NULL
MAN_02779	1515.94	5.43632	0.123445	44.0382	0	0	2775.5	2747.91	3194.52	3135.92	64.4677	67.6672	69.3497	72.1697	KID67923.1	573	multidrug resistant protein, partial	MAN_02779	A0A0B4FBG7	A0A0B4FBG7_METAN	unreviewed	Multidrug resistant protein (Fragment)	Metarhizium anisopliae ARSEF 549	573	GO:0016021; GO:0055085	integral component of membrane [GO:0016021]; transmembrane transport [GO:0055085]	PF07690;	NULL	1 out of 5	NULL	KID67923;	NULL
MAN_04711	6551.8	5.41733	0.106008	51.1031	0	0	13830.3	13640	10522.9	13222.7	309.036	296.447	312.576	280.431	KID66430.1	546	isocitrate lyase, partial	MAN_04711	A0A0B4EWX1	A0A0B4EWX1_METAN	unreviewed	Isocitrate lyase (Fragment)	Metarhizium anisopliae ARSEF 549	546	GO:0004451; GO:0019752	isocitrate lyase activity [GO:0004451]; carboxylic acid metabolic process [GO:0019752]	PF00463;	NULL	1 out of 5	NULL	KID66430;	K01637
MAN_04679	0	NA	NA	NA	NA	NA	0	0	0	0	0	0	0	0	KID66398.1	513	benzoate 4-monooxygenase, partial	MAN_04679	A0A0B4F7C0	A0A0B4F7C0_METAN	unreviewed	Benzoate 4-monooxygenase (Fragment)	Metarhizium anisopliae ARSEF 549	513	GO:0004497; GO:0005506; GO:0016705; GO:0020037	heme binding [GO:0020037]; iron ion binding [GO:0005506]; monooxygenase activity [GO:0004497]; oxidoreductase activity, acting on paired donors, with incorporation or reduction of molecular oxygen [GO:0016705]	PF00067;	SIGNAL 1 18 {ECO:0000256|SAM:SignalP}.	1 out of 5	NULL	KID66398;	K07824
MAN_01590	3256.87	5.32074	0.120407	44.1895	0	0	6500.59	6562.11	6214.02	6142.3	142.238	175.075	197.999	120.627	KID69076.1	242	hypothetical protein MAN_01590, partial	MAN_01590	A0A0B4FTR4	A0A0B4FTR4_METAN	unreviewed	Uncharacterized protein (Fragment)	Metarhizium anisopliae ARSEF 549	242	NULL	NULL	NULL	NULL	1 out of 5	NULL	KID69076;	NULL
MAN_00297	2947.18	5.28267	0.0880456	59.9992	0	0	5952.91	5750.42	5419.48	5864.09	147.355	141.779	145.735	155.68	KID70698.1	492	Kynureninase, partial	MAN_00297	A0A0B4FJS1	A0A0B4FJS1_METAN	unreviewed	Kynureninase (Fragment)	Metarhizium anisopliae ARSEF 549	492	GO:0005737; GO:0006569; GO:0009435; GO:0030170; GO:0030429	cytoplasm [GO:0005737]; kynureninase activity [GO:0030429]; pyridoxal phosphate binding [GO:0030170]; NAD biosynthetic process [GO:0009435]; tryptophan catabolic process [GO:0006569]	PF00266;	NULL	1 out of 5	NULL	KID70698;	K01556
MAN_02723	18415.9	5.21866	0.121434	42.9754	0	0	35658.5	34371	36733.9	36711.2	757.24	849.599	1113.62	1132.03	KID70209.1	350	Pyruvate/Phosphoenolpyruvate kinase, partial	MAN_02723	A0A0B4GPX8	A0A0B4GPX8_METAN	unreviewed	Pyruvate/Phosphoenolpyruvate kinase (Fragment)	Metarhizium anisopliae ARSEF 549	350	GO:0016301	kinase activity [GO:0016301]	NULL	NULL	1 out of 5	NULL	KID70209;	NULL
MAN_01657	1213.71	5.21743	0.12444	41.9271	0	0	2426.66	2350.52	2423.91	2254.35	75.724	69.8154	62.3143	46.3948	KID69143.1	443	Zn(2)-C6 fungal-type DNA-binding domain protein, partial	MAN_01657	A0A0B4FFB9	A0A0B4FFB9_METAN	unreviewed	Zn(2)-C6 fungal-type DNA-binding domain protein (Fragment)	Metarhizium anisopliae ARSEF 549	443	GO:0000981; GO:0003677; GO:0005634; GO:0008270	nucleus [GO:0005634]; DNA binding [GO:0003677]; RNA polymerase II transcription factor activity, sequence-specific DNA binding [GO:0000981]; zinc ion binding [GO:0008270]	PF00172;	NULL	1 out of 5	NULL	KID69143;	NULL
MAN_10405	13862.9	5.15588	0.0836801	61.6142	0	0	27114.6	27208.6	26504.3	27050.5	694.819	705.672	891.496	733.038	KID59764.1	793	chitinase 18-18, partial	MAN_10405	A0A0B4FU52	A0A0B4FU52_METAN	unreviewed	Chitinase 18-18 (Fragment)	Metarhizium anisopliae ARSEF 549	793	GO:0005975	carbohydrate metabolic process [GO:0005975]	PF00704;	NULL	1 out of 5	NULL	KID59764;	K01183
MAN_01263	1288.11	5.04347	0.120674	41.7942	0	0	2506.71	2605.12	2321.92	2568.2	64.4677	64.4449	89.4511	84.5417	KID71664.1	873	beta-1,3-endoglucanase, partial	MAN_01263	A0A0B4GUJ3	A0A0B4GUJ3_METAN	unreviewed	Beta-1,3-endoglucanase (Fragment)	Metarhizium anisopliae ARSEF 549	873	GO:0004553; GO:0005975	hydrolase activity, hydrolyzing O-glycosyl compounds [GO:0004553]; carbohydrate metabolic process [GO:0005975]	PF00722;	SIGNAL 1 21 {ECO:0000256|SAM:SignalP}.	1 out of 5	NULL	KID71664;	NULL
MAN_00716	2361.42	5.01325	0.121152	41.3797	0	0	4332.6	4398.54	4969.96	4623.46	169.867	108.482	128.649	159.804	KID71117.1	76	hypothetical protein MAN_00716, partial	MAN_00716	A0A0B4FTS8	A0A0B4FTS8_METAN	unreviewed	Uncharacterized protein (Fragment)	Metarhizium anisopliae ARSEF 549	76	NULL	NULL	NULL	NULL	1 out of 5	NULL	KID71117;	NULL
MAN_02593	6479.71	5.00528	0.0844001	59.3042	0	0	12111.4	12022.2	13387.5	12750.6	357.131	421.04	358.81	428.894	KID70079.1	357	C6 transcription factor, partial	MAN_02593	A0A0B4GPJ9	A0A0B4GPJ9_METAN	unreviewed	C6 transcription factor (Fragment)	Metarhizium anisopliae ARSEF 549	357	GO:0000981; GO:0005634; GO:0008270	nucleus [GO:0005634]; RNA polymerase II transcription factor activity, sequence-specific DNA binding [GO:0000981]; zinc ion binding [GO:0008270]	PF00172;	NULL	1 out of 5	NULL	KID70079;	NULL
MAN_09803	6228.77	4.84452	0.0868305	55.7929	0	0	11294.9	11234	13609.1	12016	408.296	435.003	411.073	421.677	KID60668.1	402	tryptophanyl-tRNA synthetase, partial	MAN_09803	A0A0B4ER54	A0A0B4ER54_METAN	unreviewed	Tryptophanyl-tRNA synthetase (Fragment)	Metarhizium anisopliae ARSEF 549	402	GO:0004830; GO:0005524; GO:0005737; GO:0006436	cytoplasm [GO:0005737]; ATP binding [GO:0005524]; tryptophan-tRNA ligase activity [GO:0004830]; tryptophanyl-tRNA aminoacylation [GO:0006436]	PF00579;	NULL	1 out of 5	NULL	KID60668;	K01867
MAN_06073	0	NA	NA	NA	NA	NA	0	0	0	0	0	0	0	0	KID65062.1	223	Alcohol dehydrogenase superfamily, zinc-type, partial	MAN_06073	A0A0B4FBI1	A0A0B4FBI1_METAN	unreviewed	Alcohol dehydrogenase superfamily, zinc-type (Fragment)	Metarhizium anisopliae ARSEF 549	223	NULL	NULL	NULL	SIGNAL 1 18 {ECO:0000256|SAM:SignalP}.	1 out of 5	NULL	KID65062;	NULL
MAN_08598	1418.16	4.75679	0.111257	42.755	0	0	2718.2	3001.57	2705.96	2515.17	109.493	91.297	100.507	103.1	KID61919.1	892	Nitrate reductase, partial	MAN_08598	A0A0B4G0C4	A0A0B4G0C4_METAN	unreviewed	Nitrate reductase (Fragment)	Metarhizium anisopliae ARSEF 549	892	GO:0006809; GO:0020037; GO:0030151; GO:0042128; GO:0043546; GO:0050464	heme binding [GO:0020037]; molybdenum ion binding [GO:0030151]; molybdopterin cofactor binding [GO:0043546]; nitrate reductase (NADPH) activity [GO:0050464]; nitrate assimilation [GO:0042128]; nitric oxide biosynthetic process [GO:0006809]	PF00173;PF00970;PF03404;PF00175;PF00174;	NULL	2 out of 5	NULL	KID61919;	K10534
MAN_01758	1949.23	4.69724	0.0967545	48.548	0	0	3709.93	3587.79	3893.36	3823.62	120.749	158.964	141.715	157.742	KID69244.1	196	Cupin family protein, partial	MAN_01758	A0A0B4GLV5	A0A0B4GLV5_METAN	unreviewed	Cupin family protein (Fragment)	Metarhizium anisopliae ARSEF 549	196	NULL	NULL	PF06172;	SIGNAL 1 22 {ECO:0000256|SAM:SignalP}.	1 out of 5	NULL	KID69244;	K09705
MAN_07984	2284.5	4.6627	0.0964788	48.3287	0	0	4538.2	4658.77	4306.37	4078.35	161.681	171.853	161.816	198.982	KID62768.1	308	myo-inositol oxygenase, partial	MAN_07984	A0A0B4EXF0	A0A0B4EXF0_METAN	unreviewed	Myo-inositol oxygenase (Fragment)	Metarhizium anisopliae ARSEF 549	308	GO:0005506; GO:0005737; GO:0019310; GO:0050113	cytoplasm [GO:0005737]; inositol oxygenase activity [GO:0050113]; iron ion binding [GO:0005506]; inositol catabolic process [GO:0019310]	PF05153;	NULL	1 out of 5	NULL	KID62768;	K00469
MAN_05430	2969.75	4.61245	0.0961808	47.956	0	0	5977.34	5562.53	6016.33	5268.56	210.799	235.224	217.095	270.121	KID65771.1	343	hypothetical protein MAN_05430, partial	MAN_05430	A0A0B4FIW0	A0A0B4FIW0_METAN	unreviewed	Uncharacterized protein (Fragment)	Metarhizium anisopliae ARSEF 549	343	NULL	NULL	NULL	SIGNAL 1 18 {ECO:0000256|SAM:SignalP}.	1 out of 5	NULL	KID65771;	NULL
MAN_06203	1882.27	4.53435	0.0850874	53.2905	0	0	3550.68	3566.18	3610.05	3707.99	161.681	162.186	143.725	155.68	KID65192.1	773	Transcription factor, fungi, partial	MAN_06203	A0A0B4FBV5	A0A0B4FBV5_METAN	unreviewed	Transcription factor, fungi (Fragment)	Metarhizium anisopliae ARSEF 549	773	GO:0000981; GO:0003677; GO:0005634; GO:0006351; GO:0008270	nucleus [GO:0005634]; DNA binding [GO:0003677]; RNA polymerase II transcription factor activity, sequence-specific DNA binding [GO:0000981]; zinc ion binding [GO:0008270]; transcription, DNA-templated [GO:0006351]	PF04082;PF00172;	NULL	1 out of 5	NULL	KID65192;	NULL
MAN_07872	0	NA	NA	NA	NA	NA	0	0	0	0	0	0	0	0	KID62656.1	352	Alcohol dehydrogenase superfamily, zinc-type, partial	MAN_07872	A0A0B4FA27	A0A0B4FA27_METAN	unreviewed	Alcohol dehydrogenase superfamily, zinc-type (Fragment)	Metarhizium anisopliae ARSEF 549	352	GO:0016491	oxidoreductase activity [GO:0016491]	NULL	NULL	1 out of 5	NULL	KID62656;	NULL
MAN_03668	1070.26	4.43216	0.115392	38.4097	0	0	2195.79	2070.57	2058.75	1857.91	108.47	93.4452	86.4359	90.7277	KID68812.1	540	amidohydrolase family protein, partial	MAN_03668	A0A0B4FLU8	A0A0B4FLU8_METAN	unreviewed	Amidohydrolase family protein (Fragment)	Metarhizium anisopliae ARSEF 549	540	GO:0016810	hydrolase activity, acting on carbon-nitrogen (but not peptide) bonds [GO:0016810]	PF07969;	NULL	1 out of 5	NULL	KID68812;	NULL
MAN_09799	4590.84	4.37395	0.0857259	51.0225	0	0	8374.51	8604.5	9408.54	8649.65	478.903	403.855	377.906	428.894	KID60664.1	457	FAD dependent oxidoreductase, partial	MAN_09799	A0A0B4FWM6	A0A0B4FWM6_METAN	unreviewed	FAD dependent oxidoreductase (Fragment)	Metarhizium anisopliae ARSEF 549	457	GO:0016491	oxidoreductase activity [GO:0016491]	PF01266;	NULL	1 out of 5	NULL	KID60664;	NULL
MAN_09205	1988.17	4.35554	0.0837014	52.0366	0	0	3737.73	3794.47	3982.76	3649.74	194.427	186.89	179.907	179.393	KID61440.1	218	Cerato-platanin, partial	MAN_09205	A0A0B4EH37	A0A0B4EH37_METAN	unreviewed	Cerato-platanin (Fragment)	Metarhizium anisopliae ARSEF 549	218	NULL	NULL	NULL	SIGNAL 1 18 {ECO:0000256|SAM:SignalP}.	1 out of 5	NULL	KID61440;	NULL
MAN_06065	1757.06	4.33734	0.102515	42.3095	0	0	3544.78	3114.3	3494.21	3240.25	145.308	177.224	152.77	187.641	KID65054.1	653	calcium- spray protein, partial	MAN_06065	A0A0B4G9N7	A0A0B4G9N7_METAN	unreviewed	Calcium-spray protein (Fragment)	Metarhizium anisopliae ARSEF 549	653	GO:0016021	integral component of membrane [GO:0016021]	PF06011;PF14558;	SIGNAL 1 23 {ECO:0000256|SAM:SignalP}.	1 out of 5	NULL	KID65054;	NULL
MAN_06409	1871.4	4.28118	0.0831109	51.5117	0	0	3633.25	3471.3	3620.12	3514.11	167.821	191.187	193.978	179.393	KID64235.1	214	Outer membrane protein, beta-barrel, partial	MAN_06409	A0A0B4EQB8	A0A0B4EQB8_METAN	unreviewed	Outer membrane protein, beta-barrel (Fragment)	Metarhizium anisopliae ARSEF 549	214	GO:0016021	integral component of membrane [GO:0016021]	PF11578;	NULL	1 out of 5	NULL	KID64235;	NULL
MAN_06066	6242.49	4.24544	0.0719103	59.038	0	0	12138.4	11157	12377.7	11766.4	586.349	603.634	678.421	632.001	KID65055.1	472	Mannan endo-1,6-alpha-mannosidase, partial	MAN_06066	A0A0B4ET23	A0A0B4ET23_METAN	unreviewed	Mannan endo-1,6-alpha-mannosidase (Fragment)	Metarhizium anisopliae ARSEF 549	472	GO:0008496; GO:0016021; GO:0016052	integral component of membrane [GO:0016021]; mannan endo-1,6-alpha-mannosidase activity [GO:0008496]; carbohydrate catabolic process [GO:0016052]	PF03663;	SIGNAL 1 29 {ECO:0000256|SAM:SignalP}.	1 out of 5	NULL	KID65055;	K08257
MAN_03631	1211.13	4.24216	0.0960863	44.1494	0	0	2389.59	2321.4	2242.59	2249.13	132.005	121.371	120.608	112.379	KID68775.1	257	mitochondrial triosephosphate isomerase, partial	MAN_03631	A0A0B4F3Q5	A0A0B4F3Q5_METAN	unreviewed	Triosephosphate isomerase (EC 5.3.1.1) (Fragment)	Metarhizium anisopliae ARSEF 549	257	GO:0004807; GO:0006094; GO:0006096; GO:0006098	triose-phosphate isomerase activity [GO:0004807]; gluconeogenesis [GO:0006094]; glycolytic process [GO:0006096]; pentose-phosphate shunt [GO:0006098]	PF00121;	NULL	2 out of 5	NULL	KID68775;	K01803
MAN_08210	3172.82	4.2017	0.104072	40.3729	0	0	5668.11	5451.67	6598.07	6357.04	366.34	280.335	315.592	345.384	KID62206.1	1107	ATPase, P-type, transmembrane domain protein, partial	MAN_08210	A0A0B4F8Q7	A0A0B4F8Q7_METAN	unreviewed	ATPase, P-type, transmembrane domain protein (Fragment)	Metarhizium anisopliae ARSEF 549	1107	GO:0005524; GO:0016021; GO:0016787	integral component of membrane [GO:0016021]; ATP binding [GO:0005524]; hydrolase activity [GO:0016787]	PF00689;PF00690;	NULL	1 out of 5	NULL	KID62206;	K01539
MAN_04017	9760.02	4.1562	0.0701246	59.2688	0	0	19004.6	18972.4	17931.9	18024.4	1136.88	1050.45	1014.11	945.423	KID67259.1	852	carnitine acetyl transferase, partial	MAN_04017	A0A0B4GG74	A0A0B4GG74_METAN	unreviewed	Carnitine acetyl transferase (Fragment)	Metarhizium anisopliae ARSEF 549	852	GO:0016746	transferase activity, transferring acyl groups [GO:0016746]	PF00755;	NULL	1 out of 5	NULL	KID67259;	K00624
MAN_08569	4391.1	4.13509	0.0775256	53.3384	0	0	8159.65	8745.41	8421.35	7911.53	476.857	453.263	524.646	436.111	KID61890.1	1091	NADPH-P450 reductase, partial	MAN_08569	A0A0B4EIE5	A0A0B4EIE5_METAN	unreviewed	NADPH-P450 reductase (Fragment)	Metarhizium anisopliae ARSEF 549	1091	GO:0003958; GO:0005506; GO:0010181; GO:0020037; GO:0070330	aromatase activity [GO:0070330]; FMN binding [GO:0010181]; heme binding [GO:0020037]; iron ion binding [GO:0005506]; NADPH-hemoprotein reductase activity [GO:0003958]	PF00667;PF00258;PF00175;PF00067;	NULL	1 out of 5	NULL	KID61890;	K14338
MAN_06286	3757.91	4.08838	0.0851087	48.0372	0	0	7249.65	7015.87	6999.74	7129.94	421.599	361.966	481.428	403.119	KID65275.1	523	cytochrome P450 52A12, partial	MAN_06286	A0A0B4ETL7	A0A0B4ETL7_METAN	unreviewed	Cytochrome P450 52A12 (Fragment)	Metarhizium anisopliae ARSEF 549	523	GO:0005506; GO:0016712; GO:0020037	heme binding [GO:0020037]; iron ion binding [GO:0005506]; oxidoreductase activity, acting on paired donors, with incorporation or reduction of molecular oxygen, reduced flavin or flavoprotein as one donor, and incorporation of one atom of oxygen [GO:0016712]	PF00067;	NULL	1 out of 5	NULL	KID65275;	NULL
MAN_08703	12042.1	3.79545	0.0965844	39.2967	0	0	23756.9	23604.8	20569.9	21933.2	1909.47	1586.42	1437.25	1539.28	KID62024.1	372	hypothetical protein MAN_08703, partial	MAN_08703	A0A0B4G0M8	A0A0B4G0M8_METAN	unreviewed	Uncharacterized protein (Fragment)	Metarhizium anisopliae ARSEF 549	372	NULL	NULL	PF13136;	NULL	1 out of 5	NULL	KID62024;	NULL
MAN_01391	1998.16	3.67709	0.0949306	38.7345	0	0	3523.72	3413.99	4116.24	3773.19	293.686	266.372	314.587	283.524	KID71792.1	410	actin filament organization protein App1-like protein, partial	MAN_01391	A0A0B4FVP3	A0A0B4FVP3_METAN	unreviewed	Actin filament organization protein App1-like protein (Fragment)	Metarhizium anisopliae ARSEF 549	410	NULL	NULL	PF09949;	NULL	1 out of 5	NULL	KID71792;	NULL
MAN_01533	2847.24	3.64989	0.0847636	43.0597	0	0	5285.57	5549.38	5105.95	5155.53	421.599	474.744	418.109	367.035	KID71934.1	345	C-5 sterol desaturase, partial	MAN_01533	A0A0B4GVE6	A0A0B4GVE6_METAN	unreviewed	C-5 sterol desaturase (Fragment)	Metarhizium anisopliae ARSEF 549	345	GO:0005506; GO:0008610; GO:0016021; GO:0016491	integral component of membrane [GO:0016021]; iron ion binding [GO:0005506]; oxidoreductase activity [GO:0016491]; lipid biosynthetic process [GO:0008610]	PF04116;	NULL	1 out of 5	NULL	KID71934;	K00227
MAN_10352	1515.28	3.64582	0.0850355	42.8741	0	0	2761.17	2671.82	3019.5	2773.38	217.962	223.409	226.14	228.881	KID59900.1	81	mitochondrial phosphate carrier protein, partial	MAN_10352	A0A0B4ECJ1	A0A0B4ECJ1_METAN	unreviewed	Mitochondrial phosphate carrier protein (Fragment)	Metarhizium anisopliae ARSEF 549	81	GO:0016021	integral component of membrane [GO:0016021]	NULL	NULL	1 out of 5	NULL	KID59900;	NULL
MAN_01392	8110.98	3.63781	0.0735727	49.4451	0	0	15492.7	15892.8	14343.2	14333.8	1329.26	1167.53	1138.74	1189.77	KID71793.1	140	ribosomal protein YMR-31, partial	MAN_01392	A0A0B4FN02	A0A0B4FN02_METAN	unreviewed	Ribosomal protein YMR-31 (Fragment)	Metarhizium anisopliae ARSEF 549	140	GO:0005840	ribosome [GO:0005840]	PF10937;	NULL	1 out of 5	NULL	KID71793;	K17417
MAN_01380	19493	3.63102	0.0800064	45.3842	0	0	34976.8	35382.8	38903.4	35034.2	3131.29	3063.28	2905.65	2546.56	KID71781.1	410	coproporphyrinogen III oxidase, partial	MAN_01380	A0A0B4G1H2	A0A0B4G1H2_METAN	unreviewed	Coproporphyrinogen III oxidase (Fragment)	Metarhizium anisopliae ARSEF 549	410	GO:0004109; GO:0006779	coproporphyrinogen oxidase activity [GO:0004109]; porphyrin-containing compound biosynthetic process [GO:0006779]	PF01218;	NULL	1 out of 5	NULL	KID71781;	K00228
MAN_04400	6780.33	3.58187	0.0907507	39.4694	0	0	12476.2	12570.9	12450.7	12562.8	955.76	1208.34	911.597	1106.26	KID67642.1	577	arrestin domain-containing protein, partial	MAN_04400	A0A0B4FIG1	A0A0B4FIG1_METAN	unreviewed	Arrestin domain-containing protein (Fragment)	Metarhizium anisopliae ARSEF 549	577	NULL	NULL	PF02752;PF00339;	NULL	1 out of 5	NULL	KID67642;	K20062
MAN_05580	21364.8	3.47979	0.0565088	61.5797	0	0	38531.7	38598.6	40969.7	38758.7	3691.03	3560.58	3505.68	3302.28	KID65921.1	938	magnesium-translocating P-type ATPase family protein, partial	MAN_05580	A0A0B4FJ96	A0A0B4FJ96_METAN	unreviewed	Magnesium-translocating P-type ATPase family protein (Fragment)	Metarhizium anisopliae ARSEF 549	938	GO:0005524; GO:0015444; GO:0016021	integral component of membrane [GO:0016021]; ATP binding [GO:0005524]; magnesium-importing ATPase activity [GO:0015444]	PF00689;PF00690;	NULL	1 out of 5	NULL	KID65921;	K01531
MAN_00593	12542.6	3.40033	0.0650687	52.2576	0	0	22552	22620.3	23858.8	22628.7	2143.81	2243.76	2314.67	1978.48	KID70994.1	1149	pentatricopeptide repeat protein, partial	MAN_00593	A0A0B4GSB8	A0A0B4GSB8_METAN	unreviewed	Pentatricopeptide repeat protein (Fragment)	Metarhizium anisopliae ARSEF 549	1149	NULL	NULL	PF01535;PF13041;	NULL	1 out of 5	NULL	KID70994;	NULL
MAN_10351	6713.94	3.34593	0.0796084	42.0299	0	0	12025.5	11506.5	12882.6	12487.2	1306.75	1282.45	1126.68	1093.89	KID59899.1	339	mitochondrial phosphate carrier protein, partial	MAN_10351	A0A0B4FUJ2	A0A0B4FUJ2_METAN	unreviewed	Mitochondrial phosphate carrier protein (Fragment)	Metarhizium anisopliae ARSEF 549	339	GO:0006810; GO:0016021	integral component of membrane [GO:0016021]; transport [GO:0006810]	PF00153;	NULL	1 out of 5	NULL	KID59899;	K15102
MAN_06917	4161.16	3.34169	0.0811354	41.1866	0	0	7866.43	7712.95	7201.21	7518.56	717.332	859.266	717.619	695.922	KID63746.1	364	cytochrome c peroxidase, partial	MAN_06917	A0A0B4FCY6	A0A0B4FCY6_METAN	unreviewed	Peroxidase (EC 1.11.1.-) (Fragment)	Metarhizium anisopliae ARSEF 549	364	GO:0004601; GO:0006979; GO:0020037; GO:0046872	heme binding [GO:0020037]; metal ion binding [GO:0046872]; peroxidase activity [GO:0004601]; response to oxidative stress [GO:0006979]	PF00141;	NULL	1 out of 5	NULL	KID63746;	K00428
MAN_04185	5348.81	3.31598	0.0847446	39.1292	0	0	10074.9	10246.7	9160.48	9403.42	940.41	949.489	895.516	1119.66	KID67427.1	339	fructose-1,6-bisphosphatase, partial	MAN_04185	A0A0B4FHS1	A0A0B4FHS1_METAN	unreviewed	Fructose-1,6-bisphosphatase (Fragment)	Metarhizium anisopliae ARSEF 549	339	GO:0005975; GO:0042132	fructose 1,6-bisphosphate 1-phosphatase activity [GO:0042132]; carbohydrate metabolic process [GO:0005975]	PF00316;	NULL	1 out of 5	NULL	KID67427;	K03841
MAN_04018	2254.5	3.26523	0.0742665	43.9664	0	0	3974.5	4128.92	4279.93	3954.03	463.554	415.67	409.063	410.336	KID67260.1	1493	ATP-binding cassette transporter ABC1, partial	MAN_04018	A0A0B4EZE5	A0A0B4EZE5_METAN	unreviewed	ATP-binding cassette transporter ABC1 (Fragment)	Metarhizium anisopliae ARSEF 549	1493	GO:0005524; GO:0016021; GO:0042626	integral component of membrane [GO:0016021]; ATP binding [GO:0005524]; ATPase activity, coupled to transmembrane movement of substances [GO:0042626]	PF01061;PF00005;PF14510;PF06422;	NULL	1 out of 5	NULL	KID67260;	NULL
MAN_00705	29827.5	3.26407	0.0795019	41.0565	0	0	56339.9	57134.1	50667.9	51980.5	5548.32	6124.42	5822.36	5002.39	KID71106.1	472	acyl-CoA desaturase, partial	MAN_00705	A0A0B4FZF7	A0A0B4FZF7_METAN	unreviewed	Acyl-CoA desaturase (Fragment)	Metarhizium anisopliae ARSEF 549	472	GO:0004768; GO:0006636; GO:0016021; GO:0020037; GO:0046872	integral component of membrane [GO:0016021]; heme binding [GO:0020037]; metal ion binding [GO:0046872]; stearoyl-CoA 9-desaturase activity [GO:0004768]; unsaturated fatty acid biosynthetic process [GO:0006636]	PF00173;PF00487;	NULL	1 out of 5	NULL	KID71106;	K00507
MAN_06111	4010.2	3.25055	0.0791942	41.0453	0	0	6981.71	6964.2	7876.13	7209.92	739.844	776.562	834.207	699.015	KID65100.1	582	hypothetical protein MAN_06111, partial	MAN_06111	A0A0B4ET61	A0A0B4ET61_METAN	unreviewed	Uncharacterized protein (Fragment)	Metarhizium anisopliae ARSEF 549	582	GO:0016021	integral component of membrane [GO:0016021]	PF10361;	NULL	1 out of 5	NULL	KID65100;	NULL
MAN_05552	2207.23	3.24396	0.0823461	39.3943	0	0	4104.26	4023.7	3821.59	4021.84	379.643	427.485	403.033	476.32	KID65893.1	705	copper amine oxidase 1, partial	MAN_05552	A0A0B4F5Z5	A0A0B4F5Z5_METAN	unreviewed	Amine oxidase (EC 1.4.3.-) (Fragment)	Metarhizium anisopliae ARSEF 549	705	GO:0005507; GO:0008131; GO:0009308; GO:0048038	copper ion binding [GO:0005507]; primary amine oxidase activity [GO:0008131]; quinone binding [GO:0048038]; amine metabolic process [GO:0009308]	PF01179;PF02727;	NULL	2 out of 5	NULL	KID65893;	K00276
MAN_04442	5889.37	3.19703	0.0843491	37.9023	0	0	9937.52	10226.9	11607.1	10711	1026.37	1265.27	1181.96	1158.84	KID67684.1	487	FAD binding domain-containing protein, partial	MAN_04442	A0A0B4GHB2	A0A0B4GHB2_METAN	unreviewed	FAD binding domain-containing protein (Fragment)	Metarhizium anisopliae ARSEF 549	487	GO:0016491; GO:0071949	FAD binding [GO:0071949]; oxidoreductase activity [GO:0016491]	PF01494;	NULL	1 out of 5	NULL	KID67684;	NULL
MAN_02058	3737.8	3.16541	0.0815208	38.8295	0	0	6785.39	6498.23	7062.7	6558.74	771.566	644.449	809.08	772.216	KID69544.1	546	AMP-dependent synthetase/ligase, partial	MAN_02058	A0A0B4GMW6	A0A0B4GMW6_METAN	unreviewed	AMP-dependent synthetase/ligase (Fragment)	Metarhizium anisopliae ARSEF 549	546	GO:0008152; GO:0016874	ligase activity [GO:0016874]; metabolic process [GO:0008152]	PF00501;PF13193;	NULL	1 out of 5	NULL	KID69544;	NULL
MAN_00747	7070.95	2.98008	0.0673262	44.2632	0	0	12525.1	12374.5	12852.4	12454.1	1583.04	1437.12	1726.71	1614.54	KID71148.1	500	squalene epoxidase, partial	MAN_00747	A0A0B4FL33	A0A0B4FL33_METAN	unreviewed	Squalene epoxidase (Fragment)	Metarhizium anisopliae ARSEF 549	500	GO:0004506; GO:0016021; GO:0050660	integral component of membrane [GO:0016021]; flavin adenine dinucleotide binding [GO:0050660]; squalene monooxygenase activity [GO:0004506]	PF01266;PF08491;	NULL	1 out of 5	NULL	KID71148;	K00511
MAN_07559	2688.3	2.97118	0.0639714	46.4455	0	0	4651.1	4642.8	4969.96	4810.38	587.373	627.264	602.036	615.505	KID63358.1	243	hypothetical protein MAN_07559, partial	MAN_07559	A0A0B4EZ21	A0A0B4EZ21_METAN	unreviewed	Uncharacterized protein (Fragment)	Metarhizium anisopliae ARSEF 549	243	NULL	NULL	NULL	NULL	1 out of 5	NULL	KID63358;	NULL
MAN_01032	2621.99	2.8968	0.069715	41.552	0	0	4608.97	4734.87	4619.91	4528.7	559.744	655.19	623.143	645.404	KID71433.1	540	vacuolar sorting-associated protein, partial	MAN_01032	A0A0B4FLX1	A0A0B4FLX1_METAN	unreviewed	Vacuolar sorting-associated protein (Fragment)	Metarhizium anisopliae ARSEF 549	540	NULL	NULL	PF06101;	NULL	1 out of 5	NULL	KID71433;	NULL
MAN_01755	4005.91	2.81969	0.0717164	39.3172	0	0	7120.74	7122.03	6842.35	6984.75	964.97	1088.05	898.531	1025.84	KID69241.1	525	Permease, cytosine/purine, uracil, thiamine, allantoin, partial	MAN_01755	A0A0B4FU70	A0A0B4FU70_METAN	unreviewed	Permease, cytosine/purine, uracil, thiamine, allantoin (Fragment)	Metarhizium anisopliae ARSEF 549	525	GO:0005215; GO:0016021; GO:0055085	integral component of membrane [GO:0016021]; transporter activity [GO:0005215]; transmembrane transport [GO:0055085]	PF02133;	NULL	1 out of 5	NULL	KID69241;	NULL
MAN_00213	3049.98	2.70247	0.0687822	39.2902	0	0	5279.68	5197.08	5619.69	5055.55	837.057	757.228	844.258	809.332	KID70614.1	597	endoplasmic oxidoreductin-1 precursor, partial	MAN_00213	A0A0B4GR87	A0A0B4GR87_METAN	unreviewed	Endoplasmic oxidoreductin-1 (Fragment)	Metarhizium anisopliae ARSEF 549	597	GO:0003756; GO:0005783; GO:0016671	endoplasmic reticulum [GO:0005783]; oxidoreductase activity, acting on a sulfur group of donors, disulfide as acceptor [GO:0016671]; protein disulfide isomerase activity [GO:0003756]	PF04137;	SIGNAL 1 23 {ECO:0000256|SAM:SignalP}.	2 out of 5	NULL	KID70614;	NULL
MAN_09386	12754.8	2.59969	0.0643319	40.4106	0	0	21874.5	21743.8	23225.4	20746.5	3867.04	3400.54	3602.17	3578.59	KID61102.1	406	Peptidase M24, structural domain protein, partial	MAN_09386	A0A0B4EZR4	A0A0B4EZR4_METAN	unreviewed	Methionine aminopeptidase (EC 3.4.11.18) (Fragment)	Metarhizium anisopliae ARSEF 549	406	GO:0004177; GO:0008235; GO:0046872	aminopeptidase activity [GO:0004177]; metal ion binding [GO:0046872]; metalloexopeptidase activity [GO:0008235]	PF00557;PF15801;	NULL	2 out of 5	NULL	KID61102;	K01265
MAN_05159	20377.8	2.56571	0.0611339	41.9687	0	0	35008.8	34837.9	34667.6	34951.6	5988.34	5730.23	5461.54	6376.71	KID66878.1	531	6-phosphogluconate dehydrogenase, partial	MAN_05159	A0A0B4F8L4	A0A0B4F8L4_METAN	unreviewed	6-phosphogluconate dehydrogenase, decarboxylating (EC 1.1.1.44) (Fragment)	Metarhizium anisopliae ARSEF 549	531	GO:0004616; GO:0006098; GO:0019521	phosphogluconate dehydrogenase (decarboxylating) activity [GO:0004616]; D-gluconate metabolic process [GO:0019521]; pentose-phosphate shunt [GO:0006098]	PF00393;PF03446;	NULL	2 out of 5	NULL	KID66878;	K00033
MAN_06907	2165.44	2.55755	0.0642681	39.795	0	0	3712.46	3658.25	3605.01	3831.44	604.769	656.264	617.112	638.187	KID63736.1	585	HEX2 protein-like protein, partial	MAN_06907	A0A0B4FCX7	A0A0B4FCX7_METAN	unreviewed	HEX2 protein-like protein (Fragment)	Metarhizium anisopliae ARSEF 549	585	NULL	NULL	PF08550;	NULL	1 out of 5	NULL	KID63736;	NULL
MAN_00457	2641.71	2.31857	0.0609642	38.0317	0	0	4399.17	4482.15	4350.44	4372.21	844.22	902.229	852.298	930.989	KID70858.1	331	Cyclin-like protein, partial	MAN_00457	A0A0B4FK91	A0A0B4FK91_METAN	unreviewed	Cyclin-like protein (Fragment)	Metarhizium anisopliae ARSEF 549	331	NULL	NULL	NULL	NULL	1 out of 5	NULL	KID70858;	NULL
MAN_08493	23391.1	-2.71801	0.0561841	-48.3769	0	0	6263.82	5905.43	6083.06	6433.55	42883.3	39603.6	40719.4	39236.6	KID61814.1	342	cystein rich protein, partial	MAN_08493	A0A0B4G013	A0A0B4G013_METAN	unreviewed	Cystein rich protein (Fragment)	Metarhizium anisopliae ARSEF 549	342	NULL	NULL	NULL	SIGNAL 1 20 {ECO:0000256|SAM:SignalP}.	1 out of 5	NULL	KID61814;	NULL
MAN_04270	1965.56	-3.01792	0.0713328	-42.3077	0	0	464.268	424.635	416.786	419.92	3368.7	3453.17	3587.09	3589.93	KID67512.1	746	GTPase binding protein Rid1, partial	MAN_04270	A0A0B4FI19	A0A0B4FI19_METAN	unreviewed	GTPase binding protein Rid1 (Fragment)	Metarhizium anisopliae ARSEF 549	746	GO:0003779; GO:0017048; GO:0030036	actin binding [GO:0003779]; Rho GTPase binding [GO:0017048]; actin cytoskeleton organization [GO:0030036]	PF06371;	NULL	1 out of 5	NULL	KID67512;	NULL
MAN_04709	0	NA	NA	NA	NA	NA	0	0	0	0	0	0	0	0	KID66428.1	585	Flavin monooxygenase-like protein, partial	MAN_04709	A0A0B4F7F6	A0A0B4F7F6_METAN	unreviewed	Flavin monooxygenase-like protein (Fragment)	Metarhizium anisopliae ARSEF 549	585	GO:0004497	monooxygenase activity [GO:0004497]	NULL	NULL	1 out of 5	NULL	KID66428;	NULL
MAN_01668	4794.02	-3.20793	0.0765403	-41.9116	0	0	864.499	864.301	989.71	1029.37	8303.04	8770.96	8703.9	8826.36	KID69154.1	494	taurine catabolism dioxygenase TauD, partial	MAN_01668	A0A0B4GLL6	A0A0B4GLL6_METAN	unreviewed	Taurine catabolism dioxygenase TauD (Fragment)	Metarhizium anisopliae ARSEF 549	494	GO:0051213	dioxygenase activity [GO:0051213]	NULL	NULL	1 out of 5	NULL	KID69154;	NULL
MAN_09300	3042.09	-3.36193	0.0739778	-45.4452	0	0	535.888	514.823	523.816	580.758	5156.4	5535.82	5721.86	5767.39	KID61016.1	917	pathway-specific nitrogen regulator, partial	MAN_09300	A0A0B4F569	A0A0B4F569_METAN	unreviewed	Pathway-specific nitrogen regulator (Fragment)	Metarhizium anisopliae ARSEF 549	917	NULL	NULL	NULL	NULL	1 out of 5	NULL	KID61016;	NULL
MAN_09890	4173.11	-3.54341	0.0823036	-43.0529	0	0	622.675	630.376	619.513	761.593	7605.15	7367.13	7830.49	7947.95	KID60357.1	501	Peptidase C1B, bleomycin hydrolase, partial	MAN_09890	A0A0B4EXC9	A0A0B4EXC9_METAN	unreviewed	Peptidase C1B, bleomycin hydrolase (Fragment)	Metarhizium anisopliae ARSEF 549	501	GO:0004197	cysteine-type endopeptidase activity [GO:0004197]	PF03051;	NULL	1 out of 5	NULL	KID60357;	K01372
MAN_04512	6921.6	-3.75952	0.0832238	-45.1737	0	0	943.702	884.969	868.829	1105.01	12684.8	13286.4	12930.2	12668.9	KID67754.1	457	cytochrome P450, partial	MAN_04512	A0A0B4GHG8	A0A0B4GHG8_METAN	unreviewed	Cytochrome P450 (Fragment)	Metarhizium anisopliae ARSEF 549	457	GO:0004497; GO:0005506; GO:0016705; GO:0020037	heme binding [GO:0020037]; iron ion binding [GO:0005506]; monooxygenase activity [GO:0004497]; oxidoreductase activity, acting on paired donors, with incorporation or reduction of molecular oxygen [GO:0016705]	PF00067;	NULL	1 out of 5	NULL	KID67754;	NULL
MAN_03313	2576.57	-3.77617	0.100604	-37.5349	0	0	322.712	388.936	367.679	325.155	4535.25	4809.74	4415.27	5447.78	KID68457.1	648	hypothetical protein MAN_03313, partial	MAN_03313	A0A0B4FKQ8	A0A0B4FKQ8_METAN	unreviewed	Uncharacterized protein (Fragment)	Metarhizium anisopliae ARSEF 549	648	NULL	NULL	PF09362;PF01822;	NULL	1 out of 5	NULL	KID68457;	NULL
MAN_02377	2387.97	-3.82821	0.0899408	-42.5637	0	0	305.018	285.595	316.052	349.498	4529.11	4237.25	4229.33	4851.87	KID69863.1	297	phosphotransferase enzyme family protein, partial	MAN_02377	A0A0B4FHD0	A0A0B4FHD0_METAN	unreviewed	Phosphotransferase enzyme family protein (Fragment)	Metarhizium anisopliae ARSEF 549	297	GO:0004672	protein kinase activity [GO:0004672]	PF01636;	NULL	1 out of 5	NULL	KID69863;	NULL
MAN_09470	0	NA	NA	NA	NA	NA	0	0	0	0	0	0	0	0	KID61186.1	454	Monooxygenase, FAD-binding protein, partial	MAN_09470	A0A0B4F5P4	A0A0B4F5P4_METAN	unreviewed	Monooxygenase, FAD-binding protein (Fragment)	Metarhizium anisopliae ARSEF 549	454	GO:0004497; GO:0016021; GO:0071949	integral component of membrane [GO:0016021]; FAD binding [GO:0071949]; monooxygenase activity [GO:0004497]	PF01494;	NULL	1 out of 5	NULL	KID61186;	NULL
MAN_06018	7553.1	-3.94054	0.0940498	-41.8985	0	0	813.943	862.422	941.861	1077.19	13934.2	14333.6	13315.2	15146.4	KID65007.1	448	hypothetical protein MAN_06018, partial	MAN_06018	A0A0B4FB91	A0A0B4FB91_METAN	unreviewed	Uncharacterized protein (Fragment)	Metarhizium anisopliae ARSEF 549	448	NULL	NULL	NULL	NULL	1 out of 5	NULL	KID65007;	NULL
MAN_02447	38705.2	-3.998	0.0968524	-41.2793	0	0	4313.22	4359.08	4345.41	5218.13	65867.6	77510.1	66889.3	81138.4	KID69933.1	698	adhesin protein Mad1, partial	MAN_02447	A0A0B4FHK5	A0A0B4FHK5_METAN	unreviewed	Adhesin protein Mad1 (Fragment)	Metarhizium anisopliae ARSEF 549	698	NULL	NULL	PF05730;	NULL	1 out of 5	NULL	KID69933;	NULL
MAN_09869	1439.2	-4.37967	0.112829	-38.8168	0	0	139.028	147.495	125.917	114.761	2564.38	2758.24	2578	3085.77	KID60336.1	1019	beta-galactosidase, partial	MAN_09869	A0A0B4F399	A0A0B4F399_METAN	unreviewed	Beta-galactosidase (EC 3.2.1.23) (Fragment)	Metarhizium anisopliae ARSEF 549	1019	GO:0004565; GO:0005975	beta-galactosidase activity [GO:0004565]; carbohydrate metabolic process [GO:0005975]	PF10435;PF13363;PF13364;PF01301;	SIGNAL 1 17 {ECO:0000256|SAM:SignalP}.	2 out of 5	NULL	KID60336;	NULL
MAN_07527	1151.17	-4.56649	0.115866	-39.4117	0	0	97.7406	77.975	91.9196	104.328	2378.14	2298.54	2093.56	2067.15	KID63326.1	391	hypothetical protein MAN_07527, partial	MAN_07527	A0A0B4FBW1	A0A0B4FBW1_METAN	unreviewed	Uncharacterized protein (Fragment)	Metarhizium anisopliae ARSEF 549	391	GO:0016021	integral component of membrane [GO:0016021]	NULL	NULL	1 out of 5	NULL	KID63326;	NULL
MAN_03028	3656.02	-4.60798	0.090484	-50.9259	0	0	268.787	266.806	279.536	335.588	6733.3	7540.06	6935.98	6888.08	KID68172.1	532	Pyridoxal phosphate-dependent decarboxylase, partial	MAN_03028	A0A0B4FJY5	A0A0B4FJY5_METAN	unreviewed	Pyridoxal phosphate-dependent decarboxylase (Fragment)	Metarhizium anisopliae ARSEF 549	532	GO:0016831; GO:0019752; GO:0030170	carboxy-lyase activity [GO:0016831]; pyridoxal phosphate binding [GO:0030170]; carboxylic acid metabolic process [GO:0019752]	PF00282;	NULL	1 out of 5	NULL	KID68172;	K01580
MAN_06022	3629.4	-4.87762	0.107846	-45.2276	0	0	246.879	186.952	253.094	268.644	7149.78	6476.72	6890.75	7562.36	KID65011.1	376	Pyridoxal phosphate-dependent transferase, major domain protein, partial	MAN_06022	A0A0B4FGR6	A0A0B4FGR6_METAN	unreviewed	Pyridoxal phosphate-dependent transferase, major domain protein (Fragment)	Metarhizium anisopliae ARSEF 549	376	GO:0009058; GO:0016740; GO:0030170	pyridoxal phosphate binding [GO:0030170]; transferase activity [GO:0016740]; biosynthetic process [GO:0009058]	PF00155;	NULL	1 out of 5	NULL	KID65011;	NULL
MAN_03626	5482.03	-4.93526	0.124272	-39.7133	0	0	320.185	285.595	331.163	449.479	10260.6	10035.2	11533.2	10640.9	KID68770.1	277	cell wall glucanosyltransferase Mwg2, partial	MAN_03626	A0A0B4F3Q0	A0A0B4F3Q0_METAN	unreviewed	Cell wall glucanosyltransferase Mwg2 (Fragment)	Metarhizium anisopliae ARSEF 549	277	GO:0004553; GO:0005975; GO:0016740	hydrolase activity, hydrolyzing O-glycosyl compounds [GO:0004553]; transferase activity [GO:0016740]; carbohydrate metabolic process [GO:0005975]	PF00722;	SIGNAL 1 20 {ECO:0000256|SAM:SignalP}.	1 out of 5	NULL	KID68770;	NULL
MAN_05745	2699.62	-5.01683	0.10886	-46.0852	0	0	143.241	170.042	134.732	195.615	5651.67	5120.15	5098.71	5082.81	KID66086.1	1442	heme peroxidase, animal, partial	MAN_05745	A0A0B4FJW5	A0A0B4FJW5_METAN	unreviewed	Heme peroxidase, animal (Fragment)	Metarhizium anisopliae ARSEF 549	1442	GO:0004601; GO:0006979; GO:0020037; GO:0031408	heme binding [GO:0020037]; peroxidase activity [GO:0004601]; oxylipin biosynthetic process [GO:0031408]; response to oxidative stress [GO:0006979]	PF03098;	NULL	1 out of 5	NULL	KID66086;	NULL
MAN_04148	3239.52	-5.30884	0.130832	-40.5777	0	0	147.453	165.345	120.881	199.962	6494.87	5504.67	6887.74	6395.27	KID67390.1	522	1,2-a-D-mannosidase, partial	MAN_04148	A0A0B4EZJ4	A0A0B4EZJ4_METAN	unreviewed	alpha-1,2-Mannosidase (EC 3.2.1.-) (Fragment)	Metarhizium anisopliae ARSEF 549	522	GO:0004571; GO:0005509; GO:0008152; GO:0016020	membrane [GO:0016020]; calcium ion binding [GO:0005509]; mannosyl-oligosaccharide 1,2-alpha-mannosidase activity [GO:0004571]; metabolic process [GO:0008152]	PF01532;	SIGNAL 1 19 {ECO:0000256|SAM:SignalP}.	2 out of 5	NULL	KID67390;	K01230
MAN_10468	1772.47	-5.70534	0.1508	-37.8337	0	0	47.1851	55.428	71.7729	93.0257	3298.09	3388.73	3705.69	3519.82	KID59662.1	1314	multidrug resistance protein, partial	MAN_10468	A0A0B4EVA3	A0A0B4EVA3_METAN	unreviewed	Multidrug resistance protein (Fragment)	Metarhizium anisopliae ARSEF 549	1314	GO:0005524; GO:0016021; GO:0042626	integral component of membrane [GO:0016021]; ATP binding [GO:0005524]; ATPase activity, coupled to transmembrane movement of substances [GO:0042626]	PF00664;PF00005;	NULL	1 out of 5	NULL	KID59662;	K05658
MAN_09858	1602.07	-6.51415	0.159859	-40.7494	0	0	31.1759	27.2443	30.2202	48.6863	3184.5	3141.69	2836.3	3516.73	KID60325.1	414	thaumatin family protein, partial	MAN_09858	A0A0B4EDT0	A0A0B4EDT0_METAN	unreviewed	Thaumatin family protein (Fragment)	Metarhizium anisopliae ARSEF 549	414	NULL	NULL	PF00314;	NULL	1 out of 5	NULL	KID60325;	NULL
MAN_08191	5162.72	2.23797	0.0597641	37.4468	6.77738e-307	5.70364e-305	8742.73	8612.01	8048.63	8673.12	1732.44	1806.61	1782.99	1903.22	KID62187.1	468	homogentisate 1,2-dioxygenase, partial	MAN_08191	A0A0B4F303	A0A0B4F303_METAN	unreviewed	Homogentisate 1,2-dioxygenase (Fragment)	Metarhizium anisopliae ARSEF 549	468	GO:0004411; GO:0006559; GO:0006570	homogentisate 1,2-dioxygenase activity [GO:0004411]; L-phenylalanine catabolic process [GO:0006559]; tyrosine metabolic process [GO:0006570]	PF04209;	NULL	1 out of 5	NULL	KID62187;	K00451
MAN_10213	1847.24	-4.70107	0.125761	-37.381	7.94931e-306	6.63507e-304	144.926	124.948	110.807	162.578	3304.23	3337.17	3477.54	4115.74	KID59963.1	194	carbohydrate-binding WSC domain protein, partial	MAN_10213	A0A0B4EP04	A0A0B4EP04_METAN	unreviewed	Carbohydrate-binding WSC domain protein (Fragment)	Metarhizium anisopliae ARSEF 549	194	NULL	NULL	NULL	SIGNAL 1 18 {ECO:0000256|SAM:SignalP}.	1 out of 5	NULL	KID59963;	NULL
MAN_02441	3740.28	-5.08435	0.136188	-37.3333	4.73631e-305	3.92113e-303	188.74	177.558	207.764	281.685	7569.33	7769.91	6252.53	7474.72	KID69927.1	199	extracellular serine-rich protein, partial	MAN_02441	A0A0B4FQ84	A0A0B4FQ84_METAN	unreviewed	Extracellular serine-rich protein (Fragment)	Metarhizium anisopliae ARSEF 549	199	NULL	NULL	NULL	SIGNAL 1 20 {ECO:0000256|SAM:SignalP}.	1 out of 5	NULL	KID69927;	NULL
MAN_02858	9607.52	-4.20066	0.112714	-37.2684	5.33382e-304	4.38018e-302	926.008	1000.52	837.35	1196.29	20075	16971.6	16727.4	19126	KID68002.1	453	hypothetical protein MAN_02858, partial	MAN_02858	A0A0B4FJG0	A0A0B4FJG0_METAN	unreviewed	Uncharacterized protein (Fragment)	Metarhizium anisopliae ARSEF 549	453	NULL	NULL	NULL	SIGNAL 1 16 {ECO:0000256|SAM:SignalP}.	1 out of 5	NULL	KID68002;	NULL
MAN_03363	2360.05	-2.58039	0.0693182	-37.2252	2.66664e-303	2.17235e-301	666.49	711.17	664.843	661.612	3910.02	4180.33	3843.38	4242.55	KID68507.1	756	forkhead box protein L2, partial	MAN_03363	A0A0B4FKX6	A0A0B4FKX6_METAN	unreviewed	Forkhead box protein L2 (Fragment)	Metarhizium anisopliae ARSEF 549	756	GO:0003700; GO:0005634; GO:0043565	nucleus [GO:0005634]; sequence-specific DNA binding [GO:0043565]; transcription factor activity, sequence-specific DNA binding [GO:0003700]	PF00250;	NULL	1 out of 5	NULL	KID68507;	NULL
MAN_01699	1934.72	3.00305	0.0807058	37.2099	4.72457e-303	3.81828e-301	3305.49	3292.8	3639.01	3523.67	427.738	473.67	404.038	411.367	KID69185.1	1280	multidrug resistance protein 1, partial	MAN_01699	A0A0B4F506	A0A0B4F506_METAN	unreviewed	Multidrug resistance protein 1 (Fragment)	Metarhizium anisopliae ARSEF 549	1280	GO:0005524; GO:0016021; GO:0042626	integral component of membrane [GO:0016021]; ATP binding [GO:0005524]; ATPase activity, coupled to transmembrane movement of substances [GO:0042626]	PF00664;PF00005;	NULL	1 out of 5	NULL	KID69185;	K05658
MAN_06926	9542.52	-4.59726	0.123597	-37.1956	8.04137e-303	6.44766e-301	678.286	694.259	688.768	965.033	17568	20198.1	16225.8	19321.9	KID63755.1	186	hypothetical protein MAN_06926, partial	MAN_06926	A0A0B4ENW6	A0A0B4ENW6_METAN	unreviewed	Uncharacterized protein (Fragment)	Metarhizium anisopliae ARSEF 549	186	NULL	NULL	NULL	SIGNAL 1 16 {ECO:0000256|SAM:SignalP}.	1 out of 5	NULL	KID63755;	NULL
MAN_02969	1021.49	5.45877	0.1475	37.0085	8.36658e-300	6.65601e-298	2202.53	2022.65	1756.55	2008.31	41.9552	44.0374	41.2078	54.6428	KID68113.1	323	Mitochondrial carrier domain protein, partial	MAN_02969	A0A0B4FCA2	A0A0B4FCA2_METAN	unreviewed	Mitochondrial carrier domain protein (Fragment)	Metarhizium anisopliae ARSEF 549	323	GO:0016021; GO:0055085	integral component of membrane [GO:0016021]; transmembrane transport [GO:0055085]	PF00153;	NULL	1 out of 5	NULL	KID68113;	K15100
MAN_05956	3476.64	2.83991	0.0772711	36.7526	1.05617e-295	8.33723e-294	6219.17	6257.73	6100.69	5827.58	962.923	785.154	839.232	820.673	KID64945.1	601	Oligopeptide transporter, partial	MAN_05956	A0A0B4ESJ9	A0A0B4ESJ9_METAN	unreviewed	Oligopeptide transporter (Fragment)	Metarhizium anisopliae ARSEF 549	601	GO:0005215; GO:0006857; GO:0016021	integral component of membrane [GO:0016021]; transporter activity [GO:0005215]; oligopeptide transport [GO:0006857]	PF00854;	NULL	1 out of 5	NULL	KID64945;	K03305
MAN_07577	5988.77	-2.44066	0.066416	-36.748	1.25153e-295	9.80336e-294	1916.89	1990.71	1711.22	1828.35	10309.7	10396	9621.52	10135.7	KID63376.1	336	L-threonine 3-dehydrogenase, partial	MAN_07577	A0A0B4FBY9	A0A0B4FBY9_METAN	unreviewed	L-threonine 3-dehydrogenase (Fragment)	Metarhizium anisopliae ARSEF 549	336	GO:0008270; GO:0016491	oxidoreductase activity [GO:0016491]; zinc ion binding [GO:0008270]	PF08240;PF00107;	NULL	1 out of 5	NULL	KID63376;	K17818
MAN_01386	11087.2	2.30436	0.0629055	36.6321	8.8164e-294	6.85324e-292	18665.1	18148.4	18756.6	18193.9	3945.84	3839.84	3762.98	3384.76	KID71787.1	427	Aspartate/other aminotransferase, partial	MAN_01386	A0A0B4FVN8	A0A0B4FVN8_METAN	unreviewed	Aspartate aminotransferase (EC 2.6.1.1) (Fragment)	Metarhizium anisopliae ARSEF 549	427	GO:0004069; GO:0006520; GO:0009058; GO:0030170; GO:0080130	L-aspartate:2-oxoglutarate aminotransferase activity [GO:0004069]; L-phenylalanine:2-oxoglutarate aminotransferase activity [GO:0080130]; pyridoxal phosphate binding [GO:0030170]; biosynthetic process [GO:0009058]; cellular amino acid metabolic process [GO:0006520]	PF00155;	NULL	2 out of 5	NULL	KID71787;	K14455
MAN_06660	1912.22	-3.80872	0.104334	-36.5051	9.2092e-292	7.10434e-290	248.564	242.38	248.057	279.077	3401.44	3258.77	4139.88	3479.61	KID64486.1	185	Cu/Zn superoxide dismutase- protein, partial	MAN_06660	A0A0B4FF74	A0A0B4FF74_METAN	unreviewed	Cu/Zn superoxide dismutase-protein (Fragment)	Metarhizium anisopliae ARSEF 549	185	GO:0006801; GO:0046872; GO:0055114	metal ion binding [GO:0046872]; oxidation-reduction process [GO:0055114]; superoxide metabolic process [GO:0006801]	PF00080;	SIGNAL 1 17 {ECO:0000256|SAM:SignalP}.	1 out of 5	NULL	KID64486;	NULL
MAN_10400	277.667	4.34881	0.263092	16.5296	2.24499e-61	1.89873e-60	529.147	529.854	504.928	552.938	14.3262	50.4819	21.1064	18.5579	KID59759.1	1388	ABC transporter, transmembrane domain, type 1, partial	MAN_10400	A0A0B4FU45	A0A0B4FU45_METAN	unreviewed	ABC transporter, transmembrane domain, type 1 (Fragment)	Metarhizium anisopliae ARSEF 549	1388	GO:0000770; GO:0005524; GO:0016021; GO:0042626	integral component of membrane [GO:0016021]; ATP binding [GO:0005524]; ATPase activity, coupled to transmembrane movement of substances [GO:0042626]; peptide pheromone export [GO:0000770]	PF00664;PF00005;	NULL	1 out of 5	NULL	KID59759;	NULL
MAN_01080	996.654	4.33564	0.11926	36.3545	2.2291e-289	1.69395e-287	1879.82	1895.83	2096.52	1724.89	98.2366	102.038	95.4815	80.4177	KID71481.1	521	beta-1,3-glucanosyltransferase, partial	MAN_01080	A0A0B4G0J5	A0A0B4G0J5_METAN	unreviewed	1,3-beta-glucanosyltransferase (EC 2.4.1.-) (Fragment)	Metarhizium anisopliae ARSEF 549	521	GO:0005886; GO:0016021; GO:0016740; GO:0031225	anchored component of membrane [GO:0031225]; integral component of membrane [GO:0016021]; plasma membrane [GO:0005886]; transferase activity [GO:0016740]	PF03198;PF07983;	SIGNAL 1 19 {ECO:0000256|RuleBase:RU361209}.	2 out of 5	NULL	KID71481;	NULL
MAN_05836	10985.1	-2.21965	0.0611819	-36.2795	3.40536e-288	2.56865e-286	3834.63	3962.63	3699.45	4032.27	19064	18313.1	16887.2	18087.8	KID64825.1	621	Protein kinase-like domain protein, partial	MAN_05836	A0A0B4ES60	A0A0B4ES60_METAN	unreviewed	Protein kinase-like domain protein (Fragment)	Metarhizium anisopliae ARSEF 549	621	GO:0004672; GO:0005524	ATP binding [GO:0005524]; protein kinase activity [GO:0004672]	PF00069;	NULL	1 out of 5	NULL	KID64825;	NULL
MAN_03647	859.451	4.60802	0.127167	36.236	1.64995e-287	1.2354e-285	1679.28	1589.56	1769.14	1566.66	60.3746	69.8154	58.294	82.4797	KID68791.1	540	Major facilitator superfamily domain, general substrate transporter, partial	MAN_03647	A0A0B4FSV6	A0A0B4FSV6_METAN	unreviewed	Major facilitator superfamily domain, general substrate transporter (Fragment)	Metarhizium anisopliae ARSEF 549	540	GO:0016021; GO:0055085	integral component of membrane [GO:0016021]; transmembrane transport [GO:0055085]	PF07690;	NULL	1 out of 5	NULL	KID68791;	NULL
MAN_09829	0	NA	NA	NA	NA	NA	0	0	0	0	0	0	0	0	KID60694.1	562	steroid monooxygenase, partial	MAN_09829	A0A0B4FWQ5	A0A0B4FWQ5_METAN	unreviewed	Steroid monooxygenase (Fragment)	Metarhizium anisopliae ARSEF 549	562	GO:0004497	monooxygenase activity [GO:0004497]	PF07992;	NULL	1 out of 5	NULL	KID60694;	NULL
MAN_05957	2619.23	3.1779	0.0878534	36.1728	1.62868e-286	1.2018e-284	4711.77	4630.59	4856.63	4669.54	586.349	537.041	440.22	521.684	KID64946.1	821	Transcription factor, fungi, partial	MAN_05957	A0A0B4FGI5	A0A0B4FGI5_METAN	unreviewed	Transcription factor, fungi (Fragment)	Metarhizium anisopliae ARSEF 549	821	GO:0000981; GO:0003677; GO:0005634; GO:0006351; GO:0008270	nucleus [GO:0005634]; DNA binding [GO:0003677]; RNA polymerase II transcription factor activity, sequence-specific DNA binding [GO:0000981]; zinc ion binding [GO:0008270]; transcription, DNA-templated [GO:0006351]	PF04082;PF00172;	NULL	1 out of 5	NULL	KID64946;	NULL
MAN_02727	2005.07	3.05644	0.0844984	36.1716	1.70331e-286	1.24782e-284	3452.1	3429.02	3904.7	3534.11	470.717	417.818	395.997	436.111	KID70213.1	444	PLC-like phosphodiesterase, TIM beta/alpha-barrel domain protein, partial	MAN_02727	A0A0B4FID3	A0A0B4FID3_METAN	unreviewed	PLC-like phosphodiesterase, TIM beta/alpha-barrel domain protein (Fragment)	Metarhizium anisopliae ARSEF 549	444	GO:0006629; GO:0008081; GO:0016021	integral component of membrane [GO:0016021]; phosphoric diester hydrolase activity [GO:0008081]; lipid metabolic process [GO:0006629]	NULL	NULL	1 out of 5	NULL	KID70213;	NULL
MAN_03138	1355.46	2.57099	0.0712014	36.1088	1.65236e-285	1.20186e-283	2232.87	2314.82	2394.95	2339.55	381.69	392.04	397.002	390.748	KID68282.1	326	4-nitrophenylphosphatase, partial	MAN_03138	A0A0B4FK88	A0A0B4FK88_METAN	unreviewed	4-nitrophenylphosphatase (Fragment)	Metarhizium anisopliae ARSEF 549	326	NULL	NULL	PF13344;	NULL	1 out of 5	NULL	KID68282;	K01101
MAN_08300	6752.92	3.79491	0.105134	36.0959	2.62685e-285	1.89711e-283	12169.5	13025.6	13376.2	11822.1	756.217	834.562	1043.26	995.942	KID62296.1	1067	NAD+ dependent glutamate dehydrogenase, partial	MAN_08300	A0A0B4F8Y8	A0A0B4F8Y8_METAN	unreviewed	NAD+ dependent glutamate dehydrogenase (Fragment)	Metarhizium anisopliae ARSEF 549	1067	GO:0004352; GO:0019551	glutamate dehydrogenase (NAD+) activity [GO:0004352]; glutamate catabolic process to 2-oxoglutarate [GO:0019551]	PF05088;PF00208;	NULL	1 out of 5	NULL	KID62296;	K15371
MAN_06952	2342.54	-2.55836	0.0709123	-36.0779	5.04685e-285	3.61916e-283	661.434	659.499	721.506	680.739	3867.04	3810.84	4253.45	4085.84	KID63781.1	526	kinesin, partial	MAN_06952	A0A0B4FD23	A0A0B4FD23_METAN	unreviewed	Kinesin-like protein (Fragment)	Metarhizium anisopliae ARSEF 549	526	GO:0003777; GO:0005524; GO:0005874; GO:0008017; GO:0072383	microtubule [GO:0005874]; ATP binding [GO:0005524]; microtubule binding [GO:0008017]; microtubule motor activity [GO:0003777]; plus-end-directed vesicle transport along microtubule [GO:0072383]	PF00225;	NULL	2 out of 5	NULL	KID63781;	NULL
MAN_02570	6227.07	2.99607	0.0831184	36.0458	1.60723e-284	1.14451e-282	11434	11359	10481.4	10993.5	1232.05	1324.34	1424.18	1568.15	KID70056.1	542	Malate synthase, glyoxysomal, partial	MAN_02570	A0A0B4FWL7	A0A0B4FWL7_METAN	unreviewed	Malate synthase (EC 2.3.3.9) (Fragment)	Metarhizium anisopliae ARSEF 549	542	GO:0004474; GO:0006097; GO:0006099	malate synthase activity [GO:0004474]; glyoxylate cycle [GO:0006097]; tricarboxylic acid cycle [GO:0006099]	PF01274;	NULL	2 out of 5	NULL	KID70056;	K01638
MAN_03939	1809.82	2.78402	0.077314	36.0093	5.98817e-284	4.23455e-282	3018.16	3138.73	3388.43	3098.54	432.855	445.744	466.352	489.723	KID67181.1	620	Na(+)/H(+) antiporter 2, partial	MAN_03939	A0A0B4FN93	A0A0B4FN93_METAN	unreviewed	Na(+)/H(+) antiporter 2 (Fragment)	Metarhizium anisopliae ARSEF 549	620	GO:0015299; GO:0016021	integral component of membrane [GO:0016021]; solute:proton antiporter activity [GO:0015299]	PF00999;	NULL	1 out of 5	NULL	KID67181;	NULL
MAN_08312	12595.9	3.96894	0.110406	35.9486	5.33082e-283	3.74371e-281	24802.5	24660.8	23581.8	21674.1	1875.7	1307.16	1470.42	1394.94	KID62308.1	296	uricase, partial	MAN_08312	A0A0B4EW79	A0A0B4EW79_METAN	unreviewed	Uricase (EC 1.7.3.3) (Fragment)	Metarhizium anisopliae ARSEF 549	296	GO:0004846; GO:0006144	urate oxidase activity [GO:0004846]; purine nucleobase metabolic process [GO:0006144]	PF01014;	NULL	2 out of 5	NULL	KID62308;	K00365
MAN_00734	2983.25	2.54997	0.0714276	35.7	3.95674e-279	2.75969e-277	5013.42	5528.71	5050.54	4792.13	891.292	899.007	837.222	853.665	KID71135.1	761	Serine/Threonine protein kinase, partial	MAN_00734	A0A0B4FAL9	A0A0B4FAL9_METAN	unreviewed	Serine/Threonine protein kinase (Fragment)	Metarhizium anisopliae ARSEF 549	761	GO:0004674; GO:0005524	ATP binding [GO:0005524]; protein serine/threonine kinase activity [GO:0004674]	PF00069;	NULL	1 out of 5	NULL	KID71135;	NULL
MAN_03099	3367.62	2.57266	0.0723038	35.5813	2.72754e-277	1.88942e-275	5792.81	5464.83	5824.93	5981.46	887.199	1002.12	1045.27	942.33	KID68243.1	324	taurine catabolism dioxygenase TauD, partial	MAN_03099	A0A0B4FCM2	A0A0B4FCM2_METAN	unreviewed	Taurine catabolism dioxygenase TauD (Fragment)	Metarhizium anisopliae ARSEF 549	324	GO:0051213	dioxygenase activity [GO:0051213]	PF02668;	NULL	1 out of 5	NULL	KID68243;	NULL
MAN_04306	1687.11	-4.57875	0.12885	-35.5356	1.38737e-276	9.54566e-275	114.592	132.464	127.176	166.925	2950.17	3404.84	2947.87	3652.82	KID67548.1	127	hypothetical protein MAN_04306, partial	MAN_04306	A0A0B4FAI4	A0A0B4FAI4_METAN	unreviewed	Uncharacterized protein (Fragment)	Metarhizium anisopliae ARSEF 549	127	NULL	NULL	NULL	NULL	1 out of 5	NULL	KID67548;	NULL
MAN_03632	14901	3.00144	0.0846107	35.4736	1.25687e-275	8.58977e-274	26713.5	26927.7	26535.8	25797.7	3111.85	3067.58	3163.96	3889.95	KID68776.1	323	thiazole biosynthetic enzyme variant 1, partial	MAN_03632	A0A0B4FST8	A0A0B4FST8_METAN	unreviewed	Thiazole biosynthetic enzyme variant 1 (Fragment)	Metarhizium anisopliae ARSEF 549	323	GO:0006950; GO:0009228; GO:0016491	oxidoreductase activity [GO:0016491]; response to stress [GO:0006950]; thiamine biosynthetic process [GO:0009228]	NULL	NULL	1 out of 5	NULL	KID68776;	K03146
MAN_10522	3588.32	3.35087	0.0947965	35.3481	1.07342e-273	7.28709e-272	6635.41	6346.04	5997.44	7164.71	571	633.709	622.138	736.131	KID59716.1	357	2-nitropropane dioxygenase precursor, partial	MAN_10522	A0A0B4F1L2	A0A0B4F1L2_METAN	unreviewed	2-nitropropane dioxygenase (Fragment)	Metarhizium anisopliae ARSEF 549	357	GO:0018580; GO:0051213	dioxygenase activity [GO:0051213]; nitronate monooxygenase activity [GO:0018580]	PF03060;	NULL	1 out of 5	NULL	KID59716;	K00459
MAN_09977	4085.15	4.26742	0.120746	35.3422	1.32163e-273	8.9127e-272	7660.84	7965.66	7663.33	7778.51	344.851	408.151	519.621	340.229	KID60444.1	886	transcription factor AbaA, partial	MAN_09977	A0A0B4FW38	A0A0B4FW38_METAN	unreviewed	Transcription factor AbaA (Fragment)	Metarhizium anisopliae ARSEF 549	886	GO:0003700	transcription factor activity, sequence-specific DNA binding [GO:0003700]	PF01285;	NULL	1 out of 5	NULL	KID60444;	K09448
MAN_09476	0	NA	NA	NA	NA	NA	0	0	0	0	0	0	0	0	KID61192.1	370	alcohol dehydrogenase 2, partial	MAN_09476	A0A0B4F001	A0A0B4F001_METAN	unreviewed	Alcohol dehydrogenase 2 (Fragment)	Metarhizium anisopliae ARSEF 549	370	GO:0016491	oxidoreductase activity [GO:0016491]	PF08240;PF00107;	NULL	1 out of 5	NULL	KID61192;	K13953
MAN_02569	2433.67	3.3986	0.09639	35.2588	2.51245e-272	1.67218e-270	4321.65	4507.52	4572.06	4380.9	389.876	500.522	364.84	431.987	KID70055.1	1198	Serine/threonine-protein kinase domain protein, partial	MAN_02569	A0A0B4F7M9	A0A0B4F7M9_METAN	unreviewed	Serine/threonine-protein kinase domain protein (Fragment)	Metarhizium anisopliae ARSEF 549	1198	GO:0004672; GO:0005524	ATP binding [GO:0005524]; protein kinase activity [GO:0004672]	PF16797;PF00069;	NULL	1 out of 5	NULL	KID70055;	NULL
MAN_08446	905.644	-3.72835	0.105842	-35.2257	8.07997e-272	5.34275e-270	113.75	110.856	137.25	147.798	1647.51	1697.05	1718.67	1672.28	KID62442.1	452	Zinc/iron permease, partial	MAN_08446	A0A0B4F3R0	A0A0B4F3R0_METAN	unreviewed	Zinc/iron permease (Fragment)	Metarhizium anisopliae ARSEF 549	452	GO:0016021; GO:0046873	integral component of membrane [GO:0016021]; metal ion transmembrane transporter activity [GO:0046873]	PF02535;	SIGNAL 1 18 {ECO:0000256|SAM:SignalP}.	1 out of 5	NULL	KID62442;	K14709
MAN_00131	1796.88	4.57351	0.130113	35.1504	1.14546e-270	7.52528e-269	3458.84	3698.65	2887.28	3750.59	166.797	155.742	142.72	114.441	KID70532.1	271	hypothetical protein MAN_00131, partial	MAN_00131	A0A0B4FS41	A0A0B4FS41_METAN	unreviewed	Uncharacterized protein (Fragment)	Metarhizium anisopliae ARSEF 549	271	GO:0016021	integral component of membrane [GO:0016021]	PF01988;	NULL	1 out of 5	NULL	KID70532;	NULL
MAN_10149	3760.41	2.14305	0.0610203	35.1202	3.31179e-270	2.1618e-268	6183.78	6296.25	6031.44	6017.11	1370.2	1471.49	1299.55	1413.5	KID60119.1	444	glycine cleavage system T protein, partial	MAN_10149	A0A0B4FV45	A0A0B4FV45_METAN	unreviewed	Aminomethyltransferase (EC 2.1.2.10) (Glycine cleavage system T protein) (Fragment)	Metarhizium anisopliae ARSEF 549	444	GO:0004047; GO:0005739; GO:0006546; GO:0008483	mitochondrion [GO:0005739]; aminomethyltransferase activity [GO:0004047]; transaminase activity [GO:0008483]; glycine catabolic process [GO:0006546]	PF01571;PF08669;	NULL	2 out of 5	NULL	KID60119;	K00605
MAN_06149	159.613	10.7121	1.03563	10.3435	4.47781e-25	1.7129e-24	327.768	260.23	380.27	308.637	0	0	0	0	KID65138.1	380	Alcohol dehydrogenase superfamily, zinc-type, partial	MAN_06149	A0A0B4F3T6	A0A0B4F3T6_METAN	unreviewed	Alcohol dehydrogenase superfamily, zinc-type (Fragment)	Metarhizium anisopliae ARSEF 549	380	GO:0008270; GO:0016021; GO:0016491	integral component of membrane [GO:0016021]; oxidoreductase activity [GO:0016491]; zinc ion binding [GO:0008270]	PF08240;PF00107;	NULL	1 out of 5	NULL	KID65138;	NULL
MAN_05716	3470.08	-4.04501	0.116027	-34.8626	2.74175e-266	1.76704e-264	378.323	350.418	410.49	446.871	6306.58	6165.23	5843.47	7859.28	KID66057.1	239	hypothetical protein MAN_05716, partial	MAN_05716	A0A0B4FDX2	A0A0B4FDX2_METAN	unreviewed	Uncharacterized protein (Fragment)	Metarhizium anisopliae ARSEF 549	239	NULL	NULL	NULL	NULL	1 out of 5	NULL	KID66057;	NULL
MAN_09253	1603.22	3.05783	0.0878283	34.816	1.39504e-265	8.93437e-264	2955.81	2939.56	2792.85	2762.95	313.129	315.78	387.957	357.756	KID61488.1	587	MFS transporter, partial	MAN_09253	A0A0B4ETT5	A0A0B4ETT5_METAN	unreviewed	MFS transporter (Fragment)	Metarhizium anisopliae ARSEF 549	587	GO:0016021; GO:0055085	integral component of membrane [GO:0016021]; transmembrane transport [GO:0055085]	PF07690;	NULL	1 out of 5	NULL	KID61488;	NULL
MAN_02517	1285.22	2.99725	0.086342	34.7137	4.89078e-264	3.11268e-262	2210.12	2289.46	2399.98	2237.83	256.848	314.706	296.495	276.307	KID70003.1	1121	heme peroxidase, partial	MAN_02517	A0A0B4FHS6	A0A0B4FHS6_METAN	unreviewed	Heme peroxidase (Fragment)	Metarhizium anisopliae ARSEF 549	1121	GO:0004601; GO:0005506; GO:0006979; GO:0016705; GO:0020037; GO:0031408	heme binding [GO:0020037]; iron ion binding [GO:0005506]; oxidoreductase activity, acting on paired donors, with incorporation or reduction of molecular oxygen [GO:0016705]; peroxidase activity [GO:0004601]; oxylipin biosynthetic process [GO:0031408]; response to oxidative stress [GO:0006979]	PF03098;	NULL	1 out of 5	NULL	KID70003;	NULL
MAN_07730	921.52	6.42515	0.185169	34.6989	8.17437e-264	5.17016e-262	1739.95	1720.15	1956.75	1870.08	18.4194	32.2225	18.0912	16.4959	KID63529.1	170	hypothetical protein MAN_07730, partial	MAN_07730	A0A0B4G550	A0A0B4G550_METAN	unreviewed	Uncharacterized protein (Fragment)	Metarhizium anisopliae ARSEF 549	170	GO:0016021	integral component of membrane [GO:0016021]	PF08592;	NULL	1 out of 5	NULL	KID63529;	NULL
MAN_06319	1400.06	-3.71587	0.107142	-34.6818	1.48277e-263	9.32038e-262	214.018	181.315	166.211	226.044	2675.92	2519.8	2424.23	2792.97	KID65308.1	378	hypothetical protein MAN_06319, partial	MAN_06319	A0A0B4F494	A0A0B4F494_METAN	unreviewed	Uncharacterized protein (Fragment)	Metarhizium anisopliae ARSEF 549	378	GO:0016021	integral component of membrane [GO:0016021]	NULL	NULL	1 out of 5	NULL	KID65308;	NULL
MAN_09632	1568.36	-3.12146	0.0900507	-34.6633	2.81134e-263	1.75631e-261	353.888	297.808	334.94	306.898	2662.62	2930.1	2658.41	3002.26	KID60904.1	549	glucose transporter, partial	MAN_09632	A0A0B4FXB6	A0A0B4FXB6_METAN	unreviewed	Glucose transporter (Fragment)	Metarhizium anisopliae ARSEF 549	549	GO:0008643; GO:0016021; GO:0022891	integral component of membrane [GO:0016021]; substrate-specific transmembrane transporter activity [GO:0022891]; carbohydrate transport [GO:0008643]	PF00083;	NULL	1 out of 5	NULL	KID60904;	NULL
MAN_02550	1406.22	3.82732	0.110505	34.6348	7.57266e-263	4.70198e-261	2709.77	2845.62	2475.53	2477.79	201.59	205.15	148.75	185.579	KID70036.1	517	MYB DNA-binding domain containing protein, partial	MAN_02550	A0A0B4FWK5	A0A0B4FWK5_METAN	unreviewed	MYB DNA-binding domain containing protein (Fragment)	Metarhizium anisopliae ARSEF 549	517	GO:0003677	DNA binding [GO:0003677]	PF00249;	NULL	1 out of 5	NULL	KID70036;	NULL
MAN_07357	5817.65	4.52364	0.130616	34.6332	8.00004e-263	4.93723e-261	11756.7	11319.5	10997.6	10528.4	364.294	444.67	519.621	610.35	KID63156.1	528	Amine oxidase, partial	MAN_07357	A0A0B4FBK3	A0A0B4FBK3_METAN	unreviewed	Amine oxidase (Fragment)	Metarhizium anisopliae ARSEF 549	528	GO:0016491	oxidoreductase activity [GO:0016491]	PF01593;	SIGNAL 1 22 {ECO:0000256|SAM:SignalP}.	1 out of 5	NULL	KID63156;	K13366
MAN_09951	16310	-2.49151	0.0722614	-34.4792	1.64631e-260	1.0099e-258	4956.96	5101.26	4564.5	5072.07	28494.7	27008.9	29923.9	25357.3	KID60418.1	511	immunogenic protein, partial	MAN_09951	A0A0B4EQC3	A0A0B4EQC3_METAN	unreviewed	Immunogenic protein (Fragment)	Metarhizium anisopliae ARSEF 549	511	NULL	NULL	NULL	NULL	1 out of 5	NULL	KID60418;	NULL
MAN_03906	3711.79	3.2034	0.092934	34.4697	2.28601e-260	1.39392e-258	6915.99	6442.8	6386.53	7041.26	768.496	622.968	692.492	823.766	KID67148.1	335	NAD(P)-binding domain protein, partial	MAN_03906	A0A0B4F9C2	A0A0B4F9C2_METAN	unreviewed	NAD(P)-binding domain protein (Fragment)	Metarhizium anisopliae ARSEF 549	335	GO:0003824; GO:0050662	catalytic activity [GO:0003824]; coenzyme binding [GO:0050662]	PF01370;	NULL	1 out of 5	NULL	KID67148;	NULL
MAN_09240	1413.42	3.7709	0.109552	34.4211	1.22123e-259	7.40223e-258	2473.85	2657.73	2862.1	2542.12	188.287	210.52	217.095	155.68	KID61475.1	266	hypothetical protein MAN_09240, partial	MAN_09240	A0A0B4EH78	A0A0B4EH78_METAN	unreviewed	Uncharacterized protein (Fragment)	Metarhizium anisopliae ARSEF 549	266	NULL	NULL	NULL	NULL	1 out of 5	NULL	KID61475;	NULL
MAN_01905	1534.13	2.65352	0.077271	34.3405	1.95539e-258	1.17821e-256	2619.62	2540.29	2658.11	2772.51	410.342	396.336	459.316	416.522	KID69391.1	674	Low temperature requirement A, partial	MAN_01905	A0A0B4FUL7	A0A0B4FUL7_METAN	unreviewed	Low temperature requirement A (Fragment)	Metarhizium anisopliae ARSEF 549	674	GO:0016021	integral component of membrane [GO:0016021]	NULL	NULL	1 out of 5	NULL	KID69391;	NULL
MAN_08931	749.671	-4.6231	0.134708	-34.3193	4.04369e-258	2.42217e-256	54.7684	54.4886	52.8853	70.4213	1419.31	1552.05	1300.56	1492.88	KID61692.1	341	capsule polysaccharide biosynthesis protein, partial	MAN_08931	A0A0B4F1G6	A0A0B4F1G6_METAN	unreviewed	Capsule polysaccharide biosynthesis protein (Fragment)	Metarhizium anisopliae ARSEF 549	341	NULL	NULL	NULL	SIGNAL 1 23 {ECO:0000256|SAM:SignalP}.	1 out of 5	NULL	KID61692;	NULL
MAN_02238	5092.12	-5.03651	0.147315	-34.1888	3.54869e-256	2.11323e-254	225.814	317.537	273.241	386.882	9048	9870.82	9035.57	11579.1	KID69724.1	221	hypothetical protein MAN_02238, partial	MAN_02238	A0A0B4GNE0	A0A0B4GNE0_METAN	unreviewed	Uncharacterized protein (Fragment)	Metarhizium anisopliae ARSEF 549	221	GO:0016021	integral component of membrane [GO:0016021]	NULL	NULL	1 out of 5	NULL	KID69724;	NULL
MAN_10183	1236.82	-3.38058	0.0989425	-34.1672	7.43919e-256	4.40426e-254	192.111	224.53	231.688	220.827	2203.16	2349.02	2048.33	2424.9	KID60153.1	266	hypothetical protein MAN_10183, partial	MAN_10183	A0A0B4EPJ9	A0A0B4EPJ9_METAN	unreviewed	Uncharacterized protein (Fragment)	Metarhizium anisopliae ARSEF 549	266	GO:0016021	integral component of membrane [GO:0016021]	NULL	NULL	1 out of 5	NULL	KID60153;	NULL
MAN_01050	10605.2	-2.69739	0.0790578	-34.1192	3.83146e-255	2.25525e-253	2579.17	2751.67	2830.62	3171.57	17954.8	17232.6	19023.9	19297.2	KID71451.1	3464	hypothetical protein MAN_01050, partial	MAN_01050	A0A0B4G0G8	A0A0B4G0G8_METAN	unreviewed	Uncharacterized protein (Fragment)	Metarhizium anisopliae ARSEF 549	3464	NULL	NULL	NULL	NULL	1 out of 5	NULL	KID71451;	NULL
MAN_05375	1070.58	3.11919	0.0916724	34.0253	9.40438e-254	5.50372e-252	1875.61	1904.28	2029.79	1870.95	194.427	237.372	216.09	236.098	KID65716.1	449	Cytochrome P450, partial	MAN_05375	A0A0B4FIR1	A0A0B4FIR1_METAN	unreviewed	Cytochrome P450 (Fragment)	Metarhizium anisopliae ARSEF 549	449	GO:0005506; GO:0016705; GO:0020037	heme binding [GO:0020037]; iron ion binding [GO:0005506]; oxidoreductase activity, acting on paired donors, with incorporation or reduction of molecular oxygen [GO:0016705]	PF00067;	NULL	1 out of 5	NULL	KID65716;	NULL
MAN_08934	2895.84	-5.38241	0.158785	-33.8976	7.23352e-252	4.1964e-250	107.852	96.7642	162.433	177.357	5946.38	5102.97	5953.02	5619.96	KID61695.1	346	3-ketodihydrosphingosine reductase tsc10, partial	MAN_08934	A0A0B4EHU2	A0A0B4EHU2_METAN	unreviewed	3-ketodihydrosphingosine reductase tsc10 (Fragment)	Metarhizium anisopliae ARSEF 549	346	GO:0016021	integral component of membrane [GO:0016021]	PF00106;	NULL	1 out of 5	NULL	KID61695;	K04708
MAN_07802	906.985	-4.10967	0.121238	-33.8975	7.25293e-252	4.1964e-250	97.7406	96.7642	79.3279	119.977	1722.21	1588.57	1857.37	1693.93	KID62586.1	503	choline transport protein, partial	MAN_07802	A0A0B4F9X7	A0A0B4F9X7_METAN	unreviewed	Choline transport protein (Fragment)	Metarhizium anisopliae ARSEF 549	503	GO:0015171; GO:0016021	integral component of membrane [GO:0016021]; amino acid transmembrane transporter activity [GO:0015171]	PF13520;	NULL	1 out of 5	NULL	KID62586;	K19564
MAN_03310	3652.24	2.27292	0.0671775	33.8346	6.11602e-251	3.51861e-249	6141.65	6330.07	5998.7	5738.9	1319.03	1212.64	1300.56	1176.37	KID68454.1	1343	ABC multidrug transporter Mdr1, partial	MAN_03310	A0A0B4GJH0	A0A0B4GJH0_METAN	unreviewed	ABC multidrug transporter Mdr1 (Fragment)	Metarhizium anisopliae ARSEF 549	1343	GO:0005524; GO:0016021; GO:0042626	integral component of membrane [GO:0016021]; ATP binding [GO:0005524]; ATPase activity, coupled to transmembrane movement of substances [GO:0042626]	PF00664;PF00005;	NULL	1 out of 5	NULL	KID68454;	K05658
MAN_07645	12656.4	-5.2728	0.156215	-33.7536	9.47616e-250	5.42111e-248	565.379	617.224	479.745	886.787	22890.1	25914.4	22631.1	27266.8	KID63444.1	361	D-alanine--D-alanine ligase, partial	MAN_07645	A0A0B4G4T4	A0A0B4G4T4_METAN	unreviewed	D-alanine--D-alanine ligase (Fragment)	Metarhizium anisopliae ARSEF 549	361	GO:0005524; GO:0008716; GO:0046872	ATP binding [GO:0005524]; D-alanine-D-alanine ligase activity [GO:0008716]; metal ion binding [GO:0046872]	PF07478;	NULL	1 out of 5	NULL	KID63444;	NULL
MAN_00627	2271.3	2.14641	0.063622	33.7369	1.66675e-249	9.48186e-248	3854.01	3768.17	3607.53	3592.36	810.452	835.636	875.415	826.859	KID71028.1	379	oxidoreductase, 2-nitropropane dioxygenase family, partial	MAN_00627	A0A0B4FKT1	A0A0B4FKT1_METAN	unreviewed	Oxidoreductase, 2-nitropropane dioxygenase family (Fragment)	Metarhizium anisopliae ARSEF 549	379	GO:0018580; GO:0051213	dioxygenase activity [GO:0051213]; nitronate monooxygenase activity [GO:0018580]	PF03060;	NULL	1 out of 5	NULL	KID71028;	NULL
MAN_02093	2177.94	3.42314	0.101495	33.7272	2.30965e-249	1.30662e-247	3821.15	3866.81	4135.12	4113.99	337.688	450.041	370.87	327.857	KID69579.1	353	PQ loop repeat protein, partial	MAN_02093	A0A0B4GMZ5	A0A0B4GMZ5_METAN	unreviewed	PQ loop repeat protein (Fragment)	Metarhizium anisopliae ARSEF 549	353	GO:0016021	integral component of membrane [GO:0016021]	PF04193;	NULL	1 out of 5	NULL	KID69579;	NULL
MAN_02986	4480.49	2.13245	0.0633779	33.6465	3.50241e-248	1.97044e-246	7204.15	7076.94	7521.04	7384.67	1682.3	1762.57	1531.72	1680.52	KID68130.1	360	adenylosuccinate synthetase, partial	MAN_02986	A0A0B4F1U4	A0A0B4F1U4_METAN	unreviewed	Adenylosuccinate synthetase (Fragment)	Metarhizium anisopliae ARSEF 549	360	GO:0004019; GO:0005525; GO:0006164	adenylosuccinate synthase activity [GO:0004019]; GTP binding [GO:0005525]; purine nucleotide biosynthetic process [GO:0006164]	PF00709;	NULL	1 out of 5	NULL	KID68130;	K01939
MAN_10501	1783.64	-4.14187	0.123381	-33.5697	4.64101e-247	2.59667e-245	171.889	183.194	214.059	198.223	2988.03	3149.21	4072.54	3291.97	KID59695.1	745	hypothetical protein MAN_10501, partial	MAN_10501	A0A0B4EBW5	A0A0B4EBW5_METAN	unreviewed	Uncharacterized protein (Fragment)	Metarhizium anisopliae ARSEF 549	745	NULL	NULL	NULL	NULL	1 out of 5	NULL	KID59695;	NULL
MAN_00040	794.329	3.73523	0.111276	33.5672	5.04425e-247	2.80687e-245	1402.07	1530.38	1460.64	1517.97	104.376	96.6674	110.558	131.967	KID70441.1	609	Major facilitator superfamily domain, general substrate transporter, partial	MAN_00040	A0A0B4FXN4	A0A0B4FXN4_METAN	unreviewed	Major facilitator superfamily domain, general substrate transporter (Fragment)	Metarhizium anisopliae ARSEF 549	609	GO:0016021; GO:0055085	integral component of membrane [GO:0016021]; transmembrane transport [GO:0055085]	PF07690;	NULL	1 out of 5	NULL	KID70441;	NULL
MAN_06504	3019.06	-3.19896	0.0953143	-33.5622	5.96778e-247	3.30271e-245	561.166	633.195	533.889	640.747	5930.01	4928.96	5792.21	5132.3	KID64330.1	404	proteinrelated to secreted protein-Streptomyces sviceus, partial	MAN_06504	A0A0B4EQM3	A0A0B4EQM3_METAN	unreviewed	Proteinrelated to secreted protein-Streptomyces sviceus (Fragment)	Metarhizium anisopliae ARSEF 549	404	GO:0016829; GO:0042597	periplasmic space [GO:0042597]; lyase activity [GO:0016829]	PF05426;	SIGNAL 1 19 {ECO:0000256|SAM:SignalP}.	1 out of 5	NULL	KID64330;	NULL
MAN_01589	1802.56	5.3931	0.160892	33.52	2.46824e-246	1.3586e-244	3274.31	3356.68	3990.32	3463.68	65.491	111.705	99.5018	58.7668	KID69075.1	533	cytochrome P450 oxidoreductase GliC, partial	MAN_01589	A0A0B4F4S2	A0A0B4F4S2_METAN	unreviewed	Cytochrome P450 oxidoreductase GliC (Fragment)	Metarhizium anisopliae ARSEF 549	533	GO:0005506; GO:0016021; GO:0016705; GO:0020037	integral component of membrane [GO:0016021]; heme binding [GO:0020037]; iron ion binding [GO:0005506]; oxidoreductase activity, acting on paired donors, with incorporation or reduction of molecular oxygen [GO:0016705]	PF00067;	NULL	1 out of 5	NULL	KID69075;	NULL
MAN_08719	7068.38	-4.12577	0.123122	-33.5095	3.5083e-246	1.9207e-244	695.98	667.015	771.873	928.518	12328.7	15312.1	11634.7	14208.2	KID62040.1	283	hypothetical protein MAN_08719, partial	MAN_08719	A0A0B4EIY2	A0A0B4EIY2_METAN	unreviewed	Uncharacterized protein (Fragment)	Metarhizium anisopliae ARSEF 549	283	GO:0016021	integral component of membrane [GO:0016021]	NULL	NULL	1 out of 5	NULL	KID62040;	NULL
MAN_09397	37977.9	10.776	0.321604	33.5072	3.78332e-246	2.06019e-244	74608.9	75694	81114.7	72232.3	30.6989	67.6672	50.2534	24.7439	KID61113.1	535	cytochrome P450 oxidoreductase OrdA-like protein, partial	MAN_09397	A0A0B4ESL7	A0A0B4ESL7_METAN	unreviewed	Cytochrome P450 oxidoreductase OrdA-like protein (Fragment)	Metarhizium anisopliae ARSEF 549	535	GO:0004497; GO:0005506; GO:0016705; GO:0020037	heme binding [GO:0020037]; iron ion binding [GO:0005506]; monooxygenase activity [GO:0004497]; oxidoreductase activity, acting on paired donors, with incorporation or reduction of molecular oxygen [GO:0016705]	PF00067;	NULL	1 out of 5	NULL	KID61113;	K21295
MAN_02683	2306.08	2.52704	0.0755177	33.4629	1.66983e-245	9.0446e-244	4164.93	4061.28	3564.72	3928.81	684.586	702.45	659.325	682.519	KID70169.1	310	Vitamin B6 biosynthesis protein, partial	MAN_02683	A0A0B4GPT7	A0A0B4GPT7_METAN	unreviewed	Vitamin B6 biosynthesis protein (Fragment)	Metarhizium anisopliae ARSEF 549	310	GO:0003824; GO:0042823	catalytic activity [GO:0003824]; pyridoxal phosphate biosynthetic process [GO:0042823]	PF01680;	NULL	1 out of 5	NULL	KID70169;	K06215
MAN_03051	659.579	3.56542	0.106785	33.3888	1.99136e-244	1.07291e-242	1226.81	1255.12	1210.07	1173.69	108.47	104.186	106.537	91.7587	KID68195.1	452	sulfide quinone-reductase, partial	MAN_03051	A0A0B4F1Z7	A0A0B4F1Z7_METAN	unreviewed	Sulfide quinone-reductase (Fragment)	Metarhizium anisopliae ARSEF 549	452	GO:0016491	oxidoreductase activity [GO:0016491]	PF07992;	NULL	1 out of 5	NULL	KID68195;	K17218
MAN_02405	3919.2	2.41974	0.0725682	33.3443	8.80729e-244	4.72024e-242	6625.29	6464.41	6891.45	6436.16	1376.34	1180.42	1157.84	1221.73	KID69891.1	574	Sulfate adenylyltransferase, partial	MAN_02405	A0A0B4FW20	A0A0B4FW20_METAN	unreviewed	Sulfate adenylyltransferase (Fragment)	Metarhizium anisopliae ARSEF 549	574	GO:0000096; GO:0000103; GO:0004020; GO:0004781; GO:0005524	adenylylsulfate kinase activity [GO:0004020]; ATP binding [GO:0005524]; sulfate adenylyltransferase (ATP) activity [GO:0004781]; sulfate assimilation [GO:0000103]; sulfur amino acid metabolic process [GO:0000096]	PF01747;PF14306;	NULL	1 out of 5	NULL	KID69891;	K00958
MAN_06253	1122.61	4.76423	0.124344	38.3149	0	0	2270.78	2217.12	2054.97	2119.59	69.5842	63.3709	85.4308	100.007	KID65242.1	327	Alcohol dehydrogenase superfamily, zinc-type, partial	MAN_06253	A0A0B4FBY0	A0A0B4FBY0_METAN	unreviewed	Alcohol dehydrogenase superfamily, zinc-type (Fragment)	Metarhizium anisopliae ARSEF 549	327	GO:0016491	oxidoreductase activity [GO:0016491]	PF00107;	NULL	1 out of 5	NULL	KID65242;	NULL
MAN_09105	1181.38	-2.57589	0.077419	-33.2721	9.77988e-243	5.1869e-241	337.036	337.265	357.605	327.763	2097.76	2089.09	1951.84	1952.71	KID61340.1	1620	hypothetical protein MAN_09105, partial	MAN_09105	A0A0B4EGS2	A0A0B4EGS2_METAN	unreviewed	Uncharacterized protein (Fragment)	Metarhizium anisopliae ARSEF 549	1620	NULL	NULL	NULL	NULL	1 out of 5	NULL	KID61340;	NULL
MAN_00698	11537	1.88675	0.0568506	33.1879	1.61155e-241	8.50279e-240	18959.1	18674.5	17910.5	17105.4	4852.48	5008.45	5037.4	4747.74	KID71099.1	692	cytochrome P450 oxidoreductase, partial	MAN_00698	A0A0B4GSQ2	A0A0B4GSQ2_METAN	unreviewed	Cytochrome P450 oxidoreductase (Fragment)	Metarhizium anisopliae ARSEF 549	692	GO:0003958; GO:0010181; GO:0016021	integral component of membrane [GO:0016021]; FMN binding [GO:0010181]; NADPH-hemoprotein reductase activity [GO:0003958]	PF00667;PF00258;PF00175;	NULL	1 out of 5	NULL	KID71099;	K00327
MAN_07724	1577.86	8.44349	0.254579	33.1665	3.27173e-241	1.71732e-239	3115.06	3013.78	3254.96	3202.86	5.11649	10.7408	10.0507	10.31	KID63523.1	110	hypothetical protein MAN_07724, partial	MAN_07724	A0A0B4EZF4	A0A0B4EZF4_METAN	unreviewed	Uncharacterized protein (Fragment)	Metarhizium anisopliae ARSEF 549	110	NULL	NULL	NULL	SIGNAL 1 18 {ECO:0000256|SAM:SignalP}.	1 out of 5	NULL	KID63523;	NULL
MAN_09963	5361.75	3.50735	0.105845	33.1368	8.7667e-241	4.57801e-239	10711.9	9913.16	9077.38	9724.22	1059.11	825.969	771.893	810.363	KID60430.1	318	thioredoxin reductase, partial	MAN_09963	A0A0B4EE51	A0A0B4EE51_METAN	unreviewed	Thioredoxin reductase (EC 1.8.1.9) (Fragment)	Metarhizium anisopliae ARSEF 549	318	GO:0004791; GO:0005737; GO:0019430	cytoplasm [GO:0005737]; thioredoxin-disulfide reductase activity [GO:0004791]; removal of superoxide radicals [GO:0019430]	PF07992;	NULL	2 out of 5	NULL	KID60430;	K00384
MAN_06294	9915.52	2.86607	0.086532	33.1215	1.45551e-240	7.56199e-239	16756.6	16060	18980.8	17960	2273.77	2167.5	2463.42	2662.03	KID65283.1	527	Histidine phosphatase superfamily, clade-2, partial	MAN_06294	A0A0B4F463	A0A0B4F463_METAN	unreviewed	Histidine phosphatase superfamily, clade-2 (Fragment)	Metarhizium anisopliae ARSEF 549	527	GO:0003993	acid phosphatase activity [GO:0003993]	PF00328;	NULL	1 out of 5	NULL	KID65283;	NULL
MAN_05061	3722.12	1.96484	0.0594903	33.0279	3.22648e-239	1.66778e-237	6144.17	6014.41	5915.59	5630.23	1577.92	1537.01	1491.52	1466.08	KID66780.1	707	Peptidase M49, dipeptidyl-peptidase III, partial	MAN_05061	A0A0B4EY05	A0A0B4EY05_METAN	unreviewed	Peptidase M49, dipeptidyl-peptidase III (Fragment)	Metarhizium anisopliae ARSEF 549	707	GO:0005737; GO:0008239; GO:0046872	cytoplasm [GO:0005737]; dipeptidyl-peptidase activity [GO:0008239]; metal ion binding [GO:0046872]	NULL	NULL	1 out of 5	NULL	KID66780;	K01277
MAN_09095	1412.62	-5.624	0.170301	-33.0238	3.69625e-239	1.90095e-237	49.7129	42.2756	56.6628	75.6377	3103.66	2961.25	2193.06	2818.74	KID61330.1	874	SNF2-related protein, partial	MAN_09095	A0A0B4EGR2	A0A0B4EGR2_METAN	unreviewed	SNF2-related protein (Fragment)	Metarhizium anisopliae ARSEF 549	874	GO:0005524	ATP binding [GO:0005524]	PF00271;PF00176;	NULL	1 out of 5	NULL	KID61330;	NULL
MAN_09507	1566.53	2.51041	0.0761779	32.9546	3.63362e-238	1.85935e-236	2713.99	2795.83	2627.89	2523	486.066	477.967	432.18	475.289	KID60779.1	516	Pyridoxal phosphate-dependent decarboxylase, partial	MAN_09507	A0A0B4FWZ1	A0A0B4FWZ1_METAN	unreviewed	Pyridoxal phosphate-dependent decarboxylase (Fragment)	Metarhizium anisopliae ARSEF 549	516	GO:0016831; GO:0019752; GO:0030170	carboxy-lyase activity [GO:0016831]; pyridoxal phosphate binding [GO:0030170]; carboxylic acid metabolic process [GO:0019752]	PF00282;	NULL	1 out of 5	NULL	KID60779;	K01580
MAN_04071	924.169	3.04161	0.0925661	32.8588	8.53293e-237	4.34454e-235	1729	1686.33	1537.45	1639.69	211.823	194.409	208.049	186.61	KID67313.1	699	integral membrane protein, partial	MAN_04071	A0A0B4F9R7	A0A0B4F9R7_METAN	unreviewed	Integral membrane protein (Fragment)	Metarhizium anisopliae ARSEF 549	699	NULL	NULL	NULL	NULL	1 out of 5	NULL	KID67313;	NULL
MAN_08336	47888.1	2.2291	0.0679071	32.8257	2.53315e-236	1.28334e-234	80414.4	81531.8	79113.8	74696.1	17246.7	17959.7	16943.4	15198.9	KID62332.1	785	Aconitase/isopropylmalate dehydratase, partial	MAN_08336	A0A0B4F3E1	A0A0B4F3E1_METAN	unreviewed	Aconitate hydratase, mitochondrial (Aconitase) (EC 4.2.1.-) (Fragment)	Metarhizium anisopliae ARSEF 549	785	GO:0003994; GO:0005739; GO:0006099; GO:0046872; GO:0051539	mitochondrion [GO:0005739]; 4 iron, 4 sulfur cluster binding [GO:0051539]; aconitate hydratase activity [GO:0003994]; metal ion binding [GO:0046872]; tricarboxylic acid cycle [GO:0006099]	PF00330;PF00694;	NULL	2 out of 5	NULL	KID62332;	K01681
MAN_08436	1177.31	3.3616	0.102416	32.8231	2.75349e-236	1.38806e-234	2186.52	2099.69	2271.55	2025.7	237.405	222.335	199.004	176.3	KID62432.1	348	acetyl esterase, partial	MAN_08436	A0A0B4F3P8	A0A0B4F3P8_METAN	unreviewed	Acetyl esterase (Fragment)	Metarhizium anisopliae ARSEF 549	348	GO:0016788	hydrolase activity, acting on ester bonds [GO:0016788]	PF00657;	SIGNAL 1 17 {ECO:0000256|SAM:SignalP}.	1 out of 5	NULL	KID62432;	NULL
MAN_10347	759.237	-4.82941	0.147409	-32.7619	2.05242e-235	1.02954e-233	39.6018	56.3675	44.0711	65.2049	1435.69	1632.61	1392.02	1408.34	KID59895.1	379	hypothetical protein MAN_10347, partial	MAN_10347	A0A0B4ECI4	A0A0B4ECI4_METAN	unreviewed	Uncharacterized protein (Fragment)	Metarhizium anisopliae ARSEF 549	379	GO:0016021	integral component of membrane [GO:0016021]	NULL	NULL	1 out of 5	NULL	KID59895;	NULL
MAN_02125	7424.1	-4.77125	0.145722	-32.742	3.94365e-235	1.96854e-233	493.758	482.881	477.227	642.486	10983.1	15755.7	13350.3	17207.3	KID69611.1	369	chitinase 18-11, partial	MAN_02125	A0A0B4FV97	A0A0B4FV97_METAN	unreviewed	Chitinase 18-11 (Fragment)	Metarhizium anisopliae ARSEF 549	369	GO:0005975; GO:0008061	chitin binding [GO:0008061]; carbohydrate metabolic process [GO:0005975]	PF00704;	SIGNAL 1 17 {ECO:0000256|SAM:SignalP}.	1 out of 5	NULL	KID69611;	NULL
MAN_03567	1649.27	2.19162	0.0670202	32.7008	1.51941e-234	7.54737e-233	2767.91	2722.55	2634.19	2699.48	627.281	578.93	565.854	597.978	KID68711.1	117	hypothetical protein MAN_03567, partial	MAN_03567	A0A0B4FSM2	A0A0B4FSM2_METAN	unreviewed	Uncharacterized protein (Fragment)	Metarhizium anisopliae ARSEF 549	117	NULL	NULL	NULL	SIGNAL 1 18 {ECO:0000256|SAM:SignalP}.	1 out of 5	NULL	KID68711;	NULL
MAN_03412	1663.02	2.4319	0.074462	32.6597	5.83942e-234	2.88654e-232	2883.35	2887.89	2721.07	2731.65	563.837	510.189	522.636	483.537	KID68556.1	146	hypothetical protein MAN_03412, partial	MAN_03412	A0A0B4FS53	A0A0B4FS53_METAN	unreviewed	Uncharacterized protein (Fragment)	Metarhizium anisopliae ARSEF 549	146	NULL	NULL	NULL	NULL	1 out of 5	NULL	KID68556;	NULL
MAN_04369	4132.43	-2.71568	0.0831717	-32.6515	7.62433e-234	3.75066e-232	1147.61	1124.53	950.676	1138.91	7080.2	7352.09	6611.34	7654.11	KID67611.1	520	hypothetical protein MAN_04369, partial	MAN_04369	A0A0B4FPK2	A0A0B4FPK2_METAN	unreviewed	Uncharacterized protein (Fragment)	Metarhizium anisopliae ARSEF 549	520	GO:0016021	integral component of membrane [GO:0016021]	NULL	SIGNAL 1 26 {ECO:0000256|SAM:SignalP}.	1 out of 5	NULL	KID67611;	NULL
MAN_06010	2459.44	2.67737	0.0820008	32.6505	7.8712e-234	3.85348e-232	4583.7	4348.75	3860.62	4221.8	720.401	654.116	659.325	626.846	KID64999.1	491	arrestin (or S-antigen), partial	MAN_06010	A0A0B4G9E6	A0A0B4G9E6_METAN	unreviewed	Arrestin (Or S-antigen) (Fragment)	Metarhizium anisopliae ARSEF 549	491	NULL	NULL	PF13002;	NULL	1 out of 5	NULL	KID64999;	K20059
MAN_00462	9264.07	-3.90631	0.119904	-32.5786	8.24988e-233	4.01955e-231	1141.71	1050.31	1157.18	1284.1	14483.8	18403.3	15623.8	20968.4	KID70863.1	483	mannan endo-1,6-alpha-mannosidase-like protein, partial	MAN_00462	A0A0B4FK96	A0A0B4FK96_METAN	unreviewed	Mannan endo-1,6-alpha-mannosidase-like protein (Fragment)	Metarhizium anisopliae ARSEF 549	483	GO:0008496; GO:0016052	mannan endo-1,6-alpha-mannosidase activity [GO:0008496]; carbohydrate catabolic process [GO:0016052]	PF03663;	NULL	1 out of 5	NULL	KID70863;	K08257
MAN_07389	1152.92	2.89912	0.089219	32.4945	1.27611e-231	6.18792e-230	2017.16	1900.52	2190.96	2024.83	250.708	276.039	271.369	291.772	KID63188.1	387	NADH oxidase, partial	MAN_07389	A0A0B4EYK6	A0A0B4EYK6_METAN	unreviewed	NADH oxidase (Fragment)	Metarhizium anisopliae ARSEF 549	387	GO:0010181; GO:0016491	FMN binding [GO:0010181]; oxidoreductase activity [GO:0016491]	PF00724;	NULL	1 out of 5	NULL	KID63188;	NULL
MAN_06208	10287.4	-4.91599	0.151702	-32.4055	2.29314e-230	1.10668e-228	575.49	538.309	615.736	907.652	17614	20307.7	18876.2	22864.4	KID65197.1	361	Kelch repeat protein, partial	MAN_06208	A0A0B4FBV8	A0A0B4FBV8_METAN	unreviewed	Kelch repeat protein (Fragment)	Metarhizium anisopliae ARSEF 549	361	NULL	NULL	NULL	NULL	1 out of 5	NULL	KID65197;	NULL
MAN_10230	1590.97	3.10775	0.0959608	32.3857	4.36988e-230	2.09898e-228	2993.73	2939.56	2524.64	2946.39	333.595	337.262	359.815	292.803	KID59980.1	866	Cutinase transcription factor 1 beta, partial	MAN_10230	A0A0B4ECU0	A0A0B4ECU0_METAN	unreviewed	Cutinase transcription factor 1 beta (Fragment)	Metarhizium anisopliae ARSEF 549	866	GO:0000981; GO:0003677; GO:0005634; GO:0006351; GO:0008270	nucleus [GO:0005634]; DNA binding [GO:0003677]; RNA polymerase II transcription factor activity, sequence-specific DNA binding [GO:0000981]; zinc ion binding [GO:0008270]; transcription, DNA-templated [GO:0006351]	PF04082;PF00172;	NULL	1 out of 5	NULL	KID59980;	NULL
MAN_02889	976.346	-4.49207	0.1394	-32.2242	8.08765e-228	3.8665e-226	69.9351	79.8539	67.9953	112.152	1926.87	1950.53	1714.65	1888.78	KID68033.1	345	hypothetical protein MAN_02889, partial	MAN_02889	A0A0B4FC39	A0A0B4FC39_METAN	unreviewed	Uncharacterized protein (Fragment)	Metarhizium anisopliae ARSEF 549	345	NULL	NULL	NULL	NULL	1 out of 5	NULL	KID68033;	NULL
MAN_09804	5071.21	4.45789	0.106658	41.7961	0	0	9349.39	9298.75	10429.7	9725.09	393.97	540.263	382.931	449.514	KID60669.1	338	quinoprotein amine dehydrogenase beta chain-like protein, partial	MAN_09804	A0A0B4FWN1	A0A0B4FWN1_METAN	unreviewed	Quinoprotein amine dehydrogenase beta chain-like protein (Fragment)	Metarhizium anisopliae ARSEF 549	338	NULL	NULL	NULL	SIGNAL 1 17 {ECO:0000256|SAM:SignalP}.	1 out of 5	NULL	KID60669;	NULL
MAN_10311	1282.69	3.23265	0.131761	24.5342	6.37023e-133	1.26448e-131	2301.96	2175.78	2524.64	2272.61	320.292	235.224	196.993	234.036	KID59859.1	1593	ABC transporter-like protein, partial	MAN_10311	A0A0B4FUF0	A0A0B4FUF0_METAN	unreviewed	ABC transporter-like protein (Fragment)	Metarhizium anisopliae ARSEF 549	1593	GO:0005215; GO:0005524; GO:0016021; GO:0016887	integral component of membrane [GO:0016021]; ATP binding [GO:0005524]; ATPase activity [GO:0016887]; transporter activity [GO:0005215]	PF00005;	NULL	1 out of 5	NULL	KID59859;	NULL
MAN_06359	2732.4	-2.80114	0.0873021	-32.0856	6.99899e-226	3.29957e-224	684.184	605.95	736.616	718.123	4719.45	4525.11	4595.17	5274.58	KID65348.1	224	Glutathione S-transferase/chloride channel, partial	MAN_06359	A0A0B4F4E3	A0A0B4F4E3_METAN	unreviewed	Glutathione S-transferase/chloride channel (Fragment)	Metarhizium anisopliae ARSEF 549	224	GO:0016740	transferase activity [GO:0016740]	PF00043;PF13417;	NULL	1 out of 5	NULL	KID65348;	K00799
MAN_00588	1062.48	-4.14094	0.129069	-32.0832	7.56742e-226	3.55111e-224	113.75	115.553	104.511	120.846	1768.26	1965.57	2408.14	1903.22	KID70989.1	481	sun, partial	MAN_00588	A0A0B4GSB3	A0A0B4GSB3_METAN	unreviewed	Sun (Fragment)	Metarhizium anisopliae ARSEF 549	481	NULL	NULL	PF03856;	SIGNAL 1 22 {ECO:0000256|SAM:SignalP}.	1 out of 5	NULL	KID70989;	NULL
MAN_02302	2698.71	2.19102	0.0683292	32.0656	1.32926e-225	6.20909e-224	4215.48	4220.04	4658.94	4617.38	983.389	979.563	986.977	927.896	KID69788.1	340	Mitochondrial carrier domain protein, partial	MAN_02302	A0A0B4FH45	A0A0B4FH45_METAN	unreviewed	Mitochondrial carrier domain protein (Fragment)	Metarhizium anisopliae ARSEF 549	340	GO:0016021; GO:0055085	integral component of membrane [GO:0016021]; transmembrane transport [GO:0055085]	PF00153;	NULL	1 out of 5	NULL	KID69788;	NULL
MAN_01331	4329.54	-3.55323	0.111007	-32.009	8.16027e-225	3.79434e-223	597.397	722.443	705.137	695.519	6660.64	8808.55	7546.06	8900.59	KID71732.1	1006	ATPase, AAA-type, core, partial	MAN_01331	A0A0B4FVI5	A0A0B4FVI5_METAN	unreviewed	ATPase, AAA-type, core (Fragment)	Metarhizium anisopliae ARSEF 549	1006	GO:0005524	ATP binding [GO:0005524]	PF00004;	NULL	1 out of 5	NULL	KID71732;	NULL
MAN_05431	61707	1.88387	0.0588633	32.0041	9.55863e-225	4.42434e-223	98490.5	97133.4	101377	91412.9	24934.7	26189.3	26343.9	27774	KID65772.1	164	DNase1 protein, partial	MAN_05431	A0A0B4FD60	A0A0B4FD60_METAN	unreviewed	DNase1 protein (Fragment)	Metarhizium anisopliae ARSEF 549	164	NULL	NULL	NULL	SIGNAL 1 19 {ECO:0000256|SAM:SignalP}.	1 out of 5	NULL	KID65772;	NULL
MAN_07880	618.074	3.51587	0.11001	31.9595	3.98919e-224	1.8381e-222	1074.3	1194.05	1126.96	1151.95	98.2366	93.4452	101.512	104.131	KID62664.1	540	CAIB/BAIF family protein, partial	MAN_07880	A0A0B4G2J6	A0A0B4G2J6_METAN	unreviewed	CAIB/BAIF family protein (Fragment)	Metarhizium anisopliae ARSEF 549	540	GO:0003824	catalytic activity [GO:0003824]	PF02515;	NULL	1 out of 5	NULL	KID62664;	NULL
MAN_04943	929.369	2.73105	0.085491	31.9455	6.23389e-224	2.85944e-222	1591.65	1611.17	1597.89	1660.55	225.125	253.483	232.171	262.904	KID66662.1	498	cellulase, partial	MAN_04943	A0A0B4FFM5	A0A0B4FFM5_METAN	unreviewed	Cellulase (Fragment)	Metarhizium anisopliae ARSEF 549	498	GO:0004553; GO:0005975; GO:0016021	integral component of membrane [GO:0016021]; hydrolase activity, hydrolyzing O-glycosyl compounds [GO:0004553]; carbohydrate metabolic process [GO:0005975]	PF00150;	NULL	1 out of 5	NULL	KID66662;	K01179
MAN_08584	5028.58	4.1914	0.13031	32.1647	5.49875e-227	2.61653e-225	10588.8	10557.6	8251.36	8743.54	630.351	414.596	521.631	520.653	KID61905.1	71	pyruvate dehydrogenase kinase, partial	MAN_08584	A0A0B4EIG1	A0A0B4EIG1_METAN	unreviewed	Pyruvate dehydrogenase kinase (Fragment)	Metarhizium anisopliae ARSEF 549	71	GO:0016301	kinase activity [GO:0016301]	PF05922;	NULL	1 out of 5	NULL	KID61905;	NULL
MAN_08482	7496.5	-5.37686	0.168513	-31.9078	2.08391e-223	9.4734e-222	335.351	290.292	328.644	453.826	10710.9	16873.8	13394.6	17584.7	KID62478.1	974	hypothetical protein MAN_08482, partial	MAN_08482	A0A0B4EWR6	A0A0B4EWR6_METAN	unreviewed	Uncharacterized protein (Fragment)	Metarhizium anisopliae ARSEF 549	974	NULL	NULL	NULL	SIGNAL 1 22 {ECO:0000256|SAM:SignalP}.	1 out of 5	NULL	KID62478;	NULL
MAN_08475	1985.33	-2.38562	0.0747937	-31.896	3.03723e-223	1.37458e-221	601.61	665.136	683.731	605.102	3491.49	3191.1	3407.18	3237.33	KID62471.1	278	Membrane fusion mating protein FIG1, partial	MAN_08475	A0A0B4F9I1	A0A0B4F9I1_METAN	unreviewed	Membrane fusion mating protein FIG1 (Fragment)	Metarhizium anisopliae ARSEF 549	278	GO:0000753; GO:0016021	integral component of membrane [GO:0016021]; cell morphogenesis involved in conjugation with cellular fusion [GO:0000753]	PF12351;	NULL	1 out of 5	NULL	KID62471;	NULL
MAN_05231	729.608	-6.39599	0.200658	-31.875	5.92161e-223	2.66813e-221	16.8518	8.45512	16.3692	26.082	1383.5	1556.35	1350.81	1478.45	KID65572.1	356	catalase, partial	MAN_05231	A0A0B4FCT1	A0A0B4FCT1_METAN	unreviewed	Catalase (Fragment)	Metarhizium anisopliae ARSEF 549	356	GO:0004096; GO:0006979; GO:0020037	catalase activity [GO:0004096]; heme binding [GO:0020037]; response to oxidative stress [GO:0006979]	PF00199;	NULL	1 out of 5	NULL	KID65572;	K03781
MAN_06583	0	NA	NA	NA	NA	NA	0	0	0	0	0	0	0	0	KID64409.1	470	Polyketide synthase, KR, partial	MAN_06583	A0A0B4G7N9	A0A0B4G7N9_METAN	unreviewed	Polyketide synthase, KR (Fragment)	Metarhizium anisopliae ARSEF 549	470	NULL	NULL	PF08659;	NULL	1 out of 5	NULL	KID64409;	NULL
MAN_10574	552.372	5.03122	0.158563	31.7301	5.97832e-221	2.67005e-219	1039.76	1170.56	1032.52	1045.02	35.8154	31.1484	31.1571	32.9919	KID59530.1	275	extracellular serine-rich protein, partial	MAN_10574	A0A0B4EBH3	A0A0B4EBH3_METAN	unreviewed	Extracellular serine-rich protein (Fragment)	Metarhizium anisopliae ARSEF 549	275	NULL	NULL	NULL	SIGNAL 1 23 {ECO:0000256|SAM:SignalP}.	1 out of 5	NULL	KID59530;	NULL
MAN_00868	1093.91	7.75666	0.244649	31.7053	1.31229e-220	5.83541e-219	2235.39	2235.91	2065.04	2174.37	14.3262	13.9631	5.02534	7.21697	KID71269.1	113	hypothetical protein MAN_00868, partial	MAN_00868	A0A0B4GT80	A0A0B4GT80_METAN	unreviewed	Uncharacterized protein (Fragment)	Metarhizium anisopliae ARSEF 549	113	NULL	NULL	NULL	SIGNAL 1 19 {ECO:0000256|SAM:SignalP}.	1 out of 5	NULL	KID71269;	NULL
MAN_01312	28548.2	2.66167	0.0839531	31.7043	1.35726e-220	6.00914e-219	50011.2	49618.4	49561.1	48028.2	8726.68	6875.2	8323.98	7240.69	KID71713.1	391	Pyridine nucleotide-disulfide oxidoreductase, FAD/NAD(P)-binding domain protein, partial	MAN_01312	A0A0B4FMS3	A0A0B4FMS3_METAN	unreviewed	Pyridine nucleotide-disulfide oxidoreductase, FAD/NAD(P)-binding domain protein (Fragment)	Metarhizium anisopliae ARSEF 549	391	GO:0016491	oxidoreductase activity [GO:0016491]	PF07992;	SIGNAL 1 18 {ECO:0000256|SAM:SignalP}.	1 out of 5	NULL	KID71713;	NULL
MAN_04308	3891.01	-2.22722	0.0702716	-31.6944	1.85341e-220	8.17023e-219	1375.95	1323.7	1377.54	1400.6	6211.42	7056.72	6039.46	6342.69	KID67550.1	972	C6 finger domain-containing protein, partial	MAN_04308	A0A0B4F054	A0A0B4F054_METAN	unreviewed	C6 finger domain-containing protein (Fragment)	Metarhizium anisopliae ARSEF 549	972	GO:0000981; GO:0005634; GO:0008270	nucleus [GO:0005634]; RNA polymerase II transcription factor activity, sequence-specific DNA binding [GO:0000981]; zinc ion binding [GO:0008270]	NULL	NULL	1 out of 5	NULL	KID67550;	NULL
MAN_04092	1078.46	-4.58635	0.144721	-31.6909	2.07357e-220	9.10135e-219	58.1388	92.0669	95.6972	100.85	1839.89	2067.61	2199.09	2174.37	KID67334.1	328	hypothetical protein MAN_04092, partial	MAN_04092	A0A0B4GGD1	A0A0B4GGD1_METAN	unreviewed	Uncharacterized protein (Fragment)	Metarhizium anisopliae ARSEF 549	328	GO:0016021	integral component of membrane [GO:0016021]	NULL	SIGNAL 1 27 {ECO:0000256|SAM:SignalP}.	1 out of 5	NULL	KID67334;	NULL
MAN_05125	1038.19	2.63386	0.0833777	31.5895	5.15356e-219	2.2523e-217	1780.4	1764.3	1843.43	1764.88	265.034	300.743	274.384	312.392	KID66844.1	420	extensin, partial	MAN_05125	A0A0B4GF31	A0A0B4GF31_METAN	unreviewed	Extensin (Fragment)	Metarhizium anisopliae ARSEF 549	420	GO:0046983	protein dimerization activity [GO:0046983]	PF00010;	NULL	1 out of 5	NULL	KID66844;	NULL
MAN_05336	2196.33	2.02927	0.064298	31.5604	1.29034e-218	5.61519e-217	3633.25	3439.36	3547.09	3493.24	917.898	877.525	827.172	835.107	KID65677.1	1095	cation-transporting ATPase pma1, partial	MAN_05336	A0A0B4FCZ5	A0A0B4FCZ5_METAN	unreviewed	Cation-transporting ATPase pma1 (Fragment)	Metarhizium anisopliae ARSEF 549	1095	GO:0005524; GO:0016021; GO:0016787	integral component of membrane [GO:0016021]; ATP binding [GO:0005524]; hydrolase activity [GO:0016787]	PF00689;PF00690;	NULL	1 out of 5	NULL	KID65677;	K01539
MAN_09396	1028.3	7.09075	0.224681	31.5593	1.33842e-218	5.79963e-217	1841.9	2012.32	2393.69	1918.76	12.2796	9.66674	13.0659	24.7439	KID61112.1	286	hypothetical protein MAN_09396, partial	MAN_09396	A0A0B4EZS4	A0A0B4EZS4_METAN	unreviewed	Uncharacterized protein (Fragment)	Metarhizium anisopliae ARSEF 549	286	NULL	NULL	NULL	NULL	1 out of 5	NULL	KID61112;	NULL
MAN_04082	42925.3	-2.12905	0.0678652	-31.3717	4.91637e-216	2.12133e-214	16230.8	15876.8	15659.1	16129.1	66481.6	65045.4	70628.2	77351.5	KID67324.1	320	covalently-linked cell wall protein, partial	MAN_04082	A0A0B4GGC3	A0A0B4GGC3_METAN	unreviewed	Covalently-linked cell wall protein (Fragment)	Metarhizium anisopliae ARSEF 549	320	GO:0005199; GO:0005618	cell wall [GO:0005618]; structural constituent of cell wall [GO:0005199]	PF00399;	NULL	1 out of 5	NULL	KID67324;	NULL
MAN_09390	64111.9	11.2933	0.360091	31.3624	6.5878e-216	2.83053e-214	120505	127071	139028	126087	32.7455	80.5562	64.3244	26.8059	KID61106.1	3997	Beta-ketoacyl synthase, partial	MAN_09390	A0A0B4F5H5	A0A0B4F5H5_METAN	unreviewed	Beta-ketoacyl synthase (Fragment)	Metarhizium anisopliae ARSEF 549	3997	GO:0003824; GO:0008152; GO:0031177	catalytic activity [GO:0003824]; phosphopantetheine binding [GO:0031177]; metabolic process [GO:0008152]	PF00698;PF00501;PF00668;PF16197;PF00109;PF02801;PF08659;PF07993;PF00550;PF14765;	NULL	1 out of 5	NULL	KID61106;	K15390
MAN_00451	652.806	-5.09068	0.162432	-31.3405	1.31123e-215	5.6102e-214	26.1203	35.6994	37.7752	49.5557	1164.51	1380.2	1216.13	1312.46	KID70852.1	196	extracellular serine-rich protein, partial	MAN_00451	A0A0B4FT16	A0A0B4FT16_METAN	unreviewed	Extracellular serine-rich protein (Fragment)	Metarhizium anisopliae ARSEF 549	196	NULL	NULL	NULL	SIGNAL 1 19 {ECO:0000256|SAM:SignalP}.	1 out of 5	NULL	KID70852;	NULL
MAN_01587	4172.58	5.00333	0.159761	31.3177	2.68122e-215	1.14238e-213	8024.84	8121.61	8336.98	7888.05	155.541	258.854	325.642	269.09	KID69073.1	1701	AMP-dependent synthetase/ligase, partial	MAN_01587	A0A0B4FF67	A0A0B4FF67_METAN	unreviewed	AMP-dependent synthetase/ligase (Fragment)	Metarhizium anisopliae ARSEF 549	1701	GO:0008152; GO:0016874	ligase activity [GO:0016874]; metabolic process [GO:0008152]	PF00501;PF00668;PF00550;	NULL	1 out of 5	NULL	KID69073;	NULL
MAN_00971	2118.52	2.78097	0.0892576	31.1566	4.12358e-213	1.7496e-211	3954.28	3747.5	3579.83	3513.24	479.927	560.671	508.565	604.164	KID71372.1	186	preli/msf1, partial	MAN_00971	A0A0B4FUH7	A0A0B4FUH7_METAN	unreviewed	Preli/msf1 (Fragment)	Metarhizium anisopliae ARSEF 549	186	NULL	NULL	PF04707;	NULL	1 out of 5	NULL	KID71372;	NULL
MAN_04020	610.874	3.70854	0.119037	31.1546	4.39537e-213	1.85718e-211	1161.09	1165.87	1116.89	1095.44	76.7473	104.186	89.4511	77.3247	KID67262.1	579	amidase, partial	MAN_04020	A0A0B4FHC2	A0A0B4FHC2_METAN	unreviewed	Amidase (Fragment)	Metarhizium anisopliae ARSEF 549	579	NULL	NULL	PF01425;	SIGNAL 1 20 {ECO:0000256|SAM:SignalP}.	1 out of 5	NULL	KID67262;	K01426
MAN_09594	595.746	-3.35384	0.107865	-31.0931	2.99018e-212	1.25822e-210	107.852	114.614	99.4747	101.72	1070.37	1157.86	1058.34	1055.74	KID60866.1	179	hypothetical protein MAN_09594, partial	MAN_09594	A0A0B4F4P8	A0A0B4F4P8_METAN	unreviewed	Uncharacterized protein (Fragment)	Metarhizium anisopliae ARSEF 549	179	GO:0016021	integral component of membrane [GO:0016021]	NULL	NULL	1 out of 5	NULL	KID60866;	NULL
MAN_02871	1694.03	-2.41224	0.0776765	-31.0549	9.78926e-212	4.10222e-210	553.582	477.245	576.701	538.158	2806.9	2963.39	2765.95	2870.29	KID68015.1	190	hypothetical protein MAN_02871, partial	MAN_02871	A0A0B4F1G7	A0A0B4F1G7_METAN	unreviewed	Uncharacterized protein (Fragment)	Metarhizium anisopliae ARSEF 549	190	NULL	NULL	NULL	SIGNAL 1 17 {ECO:0000256|SAM:SignalP}.	1 out of 5	NULL	KID68015;	NULL
MAN_08622	5880.92	2.31103	0.0744209	31.0535	1.02305e-211	4.26957e-210	9347.71	9430.28	11027.8	9352.12	1981.1	2036.46	1940.79	1931.06	KID61943.1	622	carnitine acetyl transferase, partial	MAN_08622	A0A0B4EV57	A0A0B4EV57_METAN	unreviewed	Carnitine acetyl transferase (Fragment)	Metarhizium anisopliae ARSEF 549	622	GO:0016746	transferase activity, transferring acyl groups [GO:0016746]	PF00755;	NULL	1 out of 5	NULL	KID61943;	K00624
MAN_10467	1516.43	-4.73974	0.152642	-31.0513	1.09511e-211	4.55162e-210	97.7406	86.4301	137.25	119.108	3303.2	2330.76	2923.74	3133.2	KID59661.1	500	vacuolar ATP synthase subunit B (V-ATPase 57 kDa subunit), partial	MAN_10467	A0A0B4F1H0	A0A0B4F1H0_METAN	unreviewed	Vacuolar ATP synthase subunit B (V-ATPase 57 kDa subunit) (Fragment)	Metarhizium anisopliae ARSEF 549	500	GO:0005524; GO:0015991; GO:0016820; GO:0033180; GO:0046034	proton-transporting V-type ATPase, V1 domain [GO:0033180]; ATP binding [GO:0005524]; hydrolase activity, acting on acid anhydrides, catalyzing transmembrane movement of substances [GO:0016820]; ATP hydrolysis coupled proton transport [GO:0015991]; ATP metabolic process [GO:0046034]	PF00006;PF02874;	NULL	1 out of 5	NULL	KID59661;	K02147
MAN_05952	2331.5	-4.37334	0.141235	-30.9651	1.593e-210	6.59411e-209	188.74	199.165	195.172	273.861	4818.71	4898.89	3571.01	4506.48	KID64941.1	237	hypothetical protein MAN_05952, partial	MAN_05952	A0A0B4FGH9	A0A0B4FGH9_METAN	unreviewed	Uncharacterized protein (Fragment)	Metarhizium anisopliae ARSEF 549	237	NULL	NULL	NULL	NULL	1 out of 5	NULL	KID64941;	NULL
MAN_06282	3127.25	-3.38285	0.10935	-30.9359	3.93355e-210	1.62168e-208	525.777	483.821	552.777	625.967	4908.76	5474.6	6309.82	6136.49	KID65271.1	823	Glycosyl hydrolase 92, partial	MAN_06282	A0A0B4FHF9	A0A0B4FHF9_METAN	unreviewed	Glycosyl hydrolase 92 (Fragment)	Metarhizium anisopliae ARSEF 549	823	GO:0016787; GO:0030246	carbohydrate binding [GO:0030246]; hydrolase activity [GO:0016787]	PF07971;	SIGNAL 1 23 {ECO:0000256|SAM:SignalP}.	1 out of 5	NULL	KID65271;	NULL
MAN_03237	6107.79	2.15173	0.0695666	30.9305	4.64828e-210	1.90861e-208	10179.3	9935.71	9638.97	10131.1	2191.9	2442.46	2306.63	2036.22	KID68381.1	603	5-aminolevulinate synthase, partial	MAN_03237	A0A0B4FRM4	A0A0B4FRM4_METAN	unreviewed	5-aminolevulinate synthase (EC 2.3.1.37) (5-aminolevulinic acid synthase) (Delta-ALA synthase) (Delta-aminolevulinate synthase) (Fragment)	Metarhizium anisopliae ARSEF 549	603	GO:0003870; GO:0005759; GO:0006782; GO:0030170	mitochondrial matrix [GO:0005759]; 5-aminolevulinate synthase activity [GO:0003870]; pyridoxal phosphate binding [GO:0030170]; protoporphyrinogen IX biosynthetic process [GO:0006782]	PF00155;	NULL	2 out of 5	NULL	KID68381;	K00643
MAN_02675	5993.81	2.85353	0.0922568	30.9303	4.67544e-210	1.91205e-208	10713.5	10149.9	10439.8	10819.7	1369.17	1280.31	1457.35	1720.73	KID70161.1	137	DUF636 domain-containing protein, partial	MAN_02675	A0A0B4FWW2	A0A0B4FWW2_METAN	unreviewed	DUF636 domain-containing protein (Fragment)	Metarhizium anisopliae ARSEF 549	137	GO:0008152; GO:0016846	carbon-sulfur lyase activity [GO:0016846]; metabolic process [GO:0008152]	PF04828;	NULL	1 out of 5	NULL	KID70161;	NULL
MAN_09392	36196.7	10.0095	0.324162	30.8781	2.35067e-209	9.57475e-208	68613	67787.5	79710.7	73181.6	35.8154	105.26	53.2686	86.6037	KID61108.1	160	Dimeric alpha-beta barrel, partial	MAN_09392	A0A0B4ESL4	A0A0B4ESL4_METAN	unreviewed	Dimeric alpha-beta barrel (Fragment)	Metarhizium anisopliae ARSEF 549	160	NULL	NULL	PF07110;	NULL	1 out of 5	NULL	KID61108;	NULL
MAN_02274	626.28	-4.30965	0.139616	-30.8678	3.2313e-209	1.31093e-207	59.824	73.2777	42.8119	61.7273	1201.35	1306.08	1116.63	1148.53	KID69760.1	220	RNA recognition motif containing protein, partial	MAN_02274	A0A0B4F6P2	A0A0B4F6P2_METAN	unreviewed	RNA recognition motif containing protein (Fragment)	Metarhizium anisopliae ARSEF 549	220	NULL	NULL	NULL	NULL	1 out of 5	NULL	KID69760;	NULL
MAN_04443	1530.75	2.85816	0.0926572	30.8466	6.21346e-209	2.51078e-207	2775.5	2857.83	2558.64	2569.07	331.548	396.336	346.749	410.336	KID67685.1	525	Major facilitator superfamily domain, general substrate transporter, partial	MAN_04443	A0A0B4F0G8	A0A0B4F0G8_METAN	unreviewed	Major facilitator superfamily domain, general substrate transporter (Fragment)	Metarhizium anisopliae ARSEF 549	525	GO:0016021; GO:0055085	integral component of membrane [GO:0016021]; transmembrane transport [GO:0055085]	PF07690;	NULL	1 out of 5	NULL	KID67685;	NULL
MAN_07929	1891.22	2.35236	0.0763394	30.8146	1.67249e-208	6.73161e-207	3381.32	3046.66	3097.57	3125.49	604.769	678.82	589.975	605.195	KID62713.1	495	Indoleamine 2,3-dioxygenase subfamily, partial	MAN_07929	A0A0B4EXA7	A0A0B4EXA7_METAN	unreviewed	Indoleamine 2,3-dioxygenase subfamily (Fragment)	Metarhizium anisopliae ARSEF 549	495	GO:0020037; GO:0051213	dioxygenase activity [GO:0051213]; heme binding [GO:0020037]	PF01231;	NULL	1 out of 5	NULL	KID62713;	K00463
MAN_08141	1586.95	-2.39256	0.0777491	-30.7728	6.0511e-208	2.42592e-206	513.981	505.428	498.633	512.076	2427.26	2689.5	2841.33	2707.4	KID62925.1	1005	cell cycle serine/threonine-protein kinase CDC5/MSD2, partial	MAN_08141	A0A0B4ELG6	A0A0B4ELG6_METAN	unreviewed	Cell cycle serine/threonine-protein kinase CDC5/MSD2 (Fragment)	Metarhizium anisopliae ARSEF 549	1005	GO:0004672; GO:0005524	ATP binding [GO:0005524]; protein kinase activity [GO:0004672]	PF00069;	NULL	1 out of 5	NULL	KID62925;	NULL
MAN_02596	6801.7	2.19674	0.0714078	30.7633	8.12944e-208	3.24636e-206	10832.4	10976.6	11634.8	11227.4	2683.09	2211.54	2433.27	2414.59	KID70082.1	342	hypothetical protein MAN_02596, partial	MAN_02596	A0A0B4FQQ9	A0A0B4FQQ9_METAN	unreviewed	Uncharacterized protein (Fragment)	Metarhizium anisopliae ARSEF 549	342	GO:0016021	integral component of membrane [GO:0016021]	NULL	SIGNAL 1 24 {ECO:0000256|SAM:SignalP}.	1 out of 5	NULL	KID70082;	NULL
MAN_00621	2498.34	-3.77168	0.122633	-30.7559	1.02047e-207	4.05915e-206	353.046	393.633	287.091	326.894	3842.48	4615.33	4933.88	5234.37	KID71022.1	251	prp 4 CRoW domain-containing protein, partial	MAN_00621	A0A0B4FTJ5	A0A0B4FTJ5_METAN	unreviewed	Prp 4 CRoW domain-containing protein (Fragment)	Metarhizium anisopliae ARSEF 549	251	NULL	NULL	NULL	SIGNAL 1 21 {ECO:0000256|SAM:SignalP}.	1 out of 5	NULL	KID71022;	NULL
MAN_10445	2624.27	-2.19195	0.0713513	-30.7205	3.02738e-207	1.19953e-205	921.795	949.792	941.861	956.339	4103.42	4244.77	4144.9	4731.24	KID59804.1	610	ferric reductase, partial	MAN_10445	A0A0B4FU93	A0A0B4FU93_METAN	unreviewed	Ferric reductase (Fragment)	Metarhizium anisopliae ARSEF 549	610	GO:0016021; GO:0016491	integral component of membrane [GO:0016021]; oxidoreductase activity [GO:0016491]	PF08022;PF01794;PF08030;	NULL	1 out of 5	NULL	KID59804;	NULL
MAN_09272	2280.54	-3.74043	0.12184	-30.6996	5.7598e-207	2.27334e-205	323.555	275.261	293.387	375.58	4988.58	4046.07	4191.14	3750.76	KID60988.1	237	hypothetical protein MAN_09272, partial	MAN_09272	A0A0B4ES62	A0A0B4ES62_METAN	unreviewed	Uncharacterized protein (Fragment)	Metarhizium anisopliae ARSEF 549	237	NULL	NULL	NULL	SIGNAL 1 19 {ECO:0000256|SAM:SignalP}.	1 out of 5	NULL	KID60988;	NULL
MAN_04370	911.01	-2.79657	0.0911621	-30.6769	1.15784e-206	4.55224e-205	223.287	232.046	231.688	230.391	1444.9	1669.12	1609.12	1647.53	KID67612.1	993	DNA helicase, UvrD/REP type, partial	MAN_04370	A0A0B4FID5	A0A0B4FID5_METAN	unreviewed	DNA helicase, UvrD/REP type (Fragment)	Metarhizium anisopliae ARSEF 549	993	GO:0003677; GO:0004003; GO:0005524	ATP binding [GO:0005524]; ATP-dependent DNA helicase activity [GO:0004003]; DNA binding [GO:0003677]	PF00580;PF13361;	NULL	1 out of 5	NULL	KID67612;	K03657
MAN_05746	2683.57	-5.88256	0.191818	-30.6674	1.54981e-206	6.06988e-205	59.824	63.8831	98.2155	136.496	4934.34	5196.41	5624.36	5354.99	KID66087.1	265	Chloroperoxidase, partial	MAN_05746	A0A0B4FDZ2	A0A0B4FDZ2_METAN	unreviewed	Chloroperoxidase (Fragment)	Metarhizium anisopliae ARSEF 549	265	GO:0004601	peroxidase activity [GO:0004601]	PF01328;	NULL	1 out of 5	NULL	KID66087;	NULL
MAN_03199	683.893	-6.05001	0.197293	-30.6652	1.65834e-206	6.47008e-205	29.4907	16.9102	12.5917	19.9962	1445.92	1374.83	1154.82	1416.59	KID68343.1	329	(2R)-phospho-3-sulfolactate synthase, ComA, partial	MAN_03199	A0A0B4FCY0	A0A0B4FCY0_METAN	unreviewed	(2R)-phospho-3-sulfolactate synthase, ComA (Fragment)	Metarhizium anisopliae ARSEF 549	329	GO:0003824	catalytic activity [GO:0003824]	PF02679;	NULL	1 out of 5	NULL	KID68343;	NULL
MAN_05732	6946.7	3.0501	0.0995026	30.6534	2.37884e-206	9.24568e-205	12231.1	11688.7	12873.8	12794.1	1514.48	1404.9	1781.99	1284.62	KID66073.1	537	hexose transporter-like protein, partial	MAN_05732	A0A0B4F6G9	A0A0B4F6G9_METAN	unreviewed	Hexose transporter-like protein (Fragment)	Metarhizium anisopliae ARSEF 549	537	GO:0016021; GO:0022891	integral component of membrane [GO:0016021]; substrate-specific transmembrane transporter activity [GO:0022891]	PF00083;	NULL	1 out of 5	NULL	KID66073;	K08139
MAN_05884	1102.37	4.42433	0.144662	30.5839	2.00365e-205	7.75785e-204	2218.54	2313.88	1898.83	1994.4	96.19	132.112	77.3903	87.6347	KID64873.1	160	hypothetical protein MAN_05884, partial	MAN_05884	A0A0B4F2Z6	A0A0B4F2Z6_METAN	unreviewed	Uncharacterized protein (Fragment)	Metarhizium anisopliae ARSEF 549	160	GO:0016021	integral component of membrane [GO:0016021]	PF08592;	NULL	1 out of 5	NULL	KID64873;	NULL
MAN_01151	1113.37	-3.34593	0.109421	-30.5783	2.3763e-205	9.16587e-204	165.99	212.317	190.135	228.652	2183.72	1968.79	1902.6	2054.78	KID71552.1	588	amidohydrolase 3, partial	MAN_01151	A0A0B4FV27	A0A0B4FV27_METAN	unreviewed	Amidohydrolase 3 (Fragment)	Metarhizium anisopliae ARSEF 549	588	GO:0016810	hydrolase activity, acting on carbon-nitrogen (but not peptide) bonds [GO:0016810]	PF07969;	SIGNAL 1 42 {ECO:0000256|SAM:SignalP}.	1 out of 5	NULL	KID71552;	NULL
MAN_05608	538.387	-5.04347	0.165093	-30.5493	5.77861e-205	2.22051e-203	21.0648	38.5178	27.7018	39.1229	1089.81	1037.56	975.922	1077.39	KID65949.1	288	amino acid transporter arg-13, partial	MAN_05608	A0A0B4GCB4	A0A0B4GCB4_METAN	unreviewed	Amino acid transporter arg-13 (Fragment)	Metarhizium anisopliae ARSEF 549	288	GO:0006810; GO:0016021	integral component of membrane [GO:0016021]; transport [GO:0006810]	PF00153;	NULL	1 out of 5	NULL	KID65949;	K15114
MAN_04274	8480.86	-1.9984	0.0655112	-30.5047	2.26019e-204	8.65244e-203	3292.85	3351.99	3463.98	3474.12	13186.2	12958.8	13207.6	14911.3	KID67516.1	572	d-3-phosphoglycerate dehydrogenase, partial	MAN_04274	A0A0B4FP87	A0A0B4FP87_METAN	unreviewed	D-3-phosphoglycerate dehydrogenase (EC 1.1.1.95) (Fragment)	Metarhizium anisopliae ARSEF 549	572	GO:0004617; GO:0006564; GO:0051287	NAD binding [GO:0051287]; phosphoglycerate dehydrogenase activity [GO:0004617]; L-serine biosynthetic process [GO:0006564]	PF00389;PF02826;	NULL	2 out of 5	NULL	KID67516;	K00058
MAN_09935	6203.01	3.32828	0.10917	30.487	3.87269e-204	1.47699e-202	10876.2	10648.8	11865.2	11741.2	1395.78	1027.9	1083.46	985.632	KID60402.1	231	Hypoxia induced protein, domain protein, partial	MAN_09935	A0A0B4EXH9	A0A0B4EXH9_METAN	unreviewed	Hypoxia induced protein, domain protein (Fragment)	Metarhizium anisopliae ARSEF 549	231	GO:0016021	integral component of membrane [GO:0016021]	PF04588;	NULL	1 out of 5	NULL	KID60402;	NULL
MAN_00996	1072.38	2.86041	0.0938333	30.484	4.24866e-204	1.61433e-202	1906.78	1805.64	1974.38	1853.56	243.545	282.484	229.156	283.524	KID71397.1	306	phospholipid methyltransferase, partial	MAN_00996	A0A0B4FUK3	A0A0B4FUK3_METAN	unreviewed	Phospholipid methyltransferase (Fragment)	Metarhizium anisopliae ARSEF 549	306	GO:0008168	methyltransferase activity [GO:0008168]	NULL	NULL	1 out of 5	NULL	KID71397;	NULL
MAN_03996	19478.7	-1.43257	0.0470423	-30.4528	1.09966e-203	4.16278e-202	10378.2	10784	10272.3	10687.5	27600.4	28483.6	29437.5	28186.4	KID67238.1	449	Tubulin alpha chain, partial	MAN_03996	A0A0B4F9J9	A0A0B4F9J9_METAN	unreviewed	Tubulin alpha chain (Fragment)	Metarhizium anisopliae ARSEF 549	449	GO:0003924; GO:0005200; GO:0005525; GO:0005874; GO:0007017	microtubule [GO:0005874]; GTP binding [GO:0005525]; GTPase activity [GO:0003924]; structural constituent of cytoskeleton [GO:0005200]; microtubule-based process [GO:0007017]	PF00091;PF03953;	NULL	2 out of 5	NULL	KID67238;	K07374
MAN_09387	36541.8	2.18822	0.0719625	30.4077	4.33891e-203	1.63641e-201	56548.8	56706.6	65902.6	60574.5	12652	13824.5	12518.1	13607.1	KID61103.1	826	methionine aminopeptidase, partial	MAN_09387	A0A0B4ESK9	A0A0B4ESK9_METAN	unreviewed	Methionine aminopeptidase (EC 3.4.11.18) (Fragment)	Metarhizium anisopliae ARSEF 549	826	GO:0004177; GO:0008235; GO:0046872	aminopeptidase activity [GO:0004177]; metal ion binding [GO:0046872]; metalloexopeptidase activity [GO:0008235]	PF00561;PF00557;	NULL	2 out of 5	NULL	KID61103;	K01265
MAN_10302	4494.99	3.92132	0.129008	30.3959	6.22739e-203	2.33998e-201	8500.9	8552.82	8344.54	8334.93	724.495	568.19	440.22	493.847	KID59850.1	516	hypothetical protein MAN_10302, partial	MAN_10302	A0A0B4ECC5	A0A0B4ECC5_METAN	unreviewed	Uncharacterized protein (Fragment)	Metarhizium anisopliae ARSEF 549	516	NULL	NULL	NULL	NULL	1 out of 5	NULL	KID59850;	NULL
MAN_02696	5981.8	3.51448	0.116276	30.2252	1.10474e-200	4.13588e-199	10702.6	11714.1	10559.4	11027.5	727.565	1011.79	998.033	1113.48	KID70182.1	747	hypothetical protein MAN_02696, partial	MAN_02696	A0A0B4FR12	A0A0B4FR12_METAN	unreviewed	Uncharacterized protein (Fragment)	Metarhizium anisopliae ARSEF 549	747	NULL	NULL	PF03370;	NULL	1 out of 5	NULL	KID70182;	NULL
MAN_03993	1429.79	-4.50403	0.149116	-30.205	2.03849e-200	7.60365e-199	115.435	89.2485	108.289	167.794	2878.54	2791.54	2698.61	2588.83	KID67235.1	422	aldose 1-epimerase, partial	MAN_03993	A0A0B4EZC7	A0A0B4EZC7_METAN	unreviewed	Aldose 1-epimerase (Fragment)	Metarhizium anisopliae ARSEF 549	422	GO:0005975; GO:0016853; GO:0030246	carbohydrate binding [GO:0030246]; isomerase activity [GO:0016853]; carbohydrate metabolic process [GO:0005975]	PF01263;	SIGNAL 1 22 {ECO:0000256|SAM:SignalP}.	1 out of 5	NULL	KID67235;	K01785
MAN_08351	6463.05	4.95889	0.164237	30.1934	2.88926e-200	1.07377e-198	12203.2	12314.4	13019.8	12556.7	587.373	303.965	389.967	328.888	KID62347.1	545	integral membrane protein, partial	MAN_08351	A0A0B4F3F9	A0A0B4F3F9_METAN	unreviewed	Integral membrane protein (Fragment)	Metarhizium anisopliae ARSEF 549	545	GO:0016021	integral component of membrane [GO:0016021]	PF10348;PF10355;	NULL	1 out of 5	NULL	KID62347;	NULL
MAN_01926	1368.49	-4.90991	0.162731	-30.1719	5.54329e-200	2.05263e-198	76.6758	67.641	90.6605	117.369	2323.91	3039.65	2329.75	2902.25	KID69412.1	542	Peptidase aspartic, partial	MAN_01926	A0A0B4FNQ3	A0A0B4FNQ3_METAN	unreviewed	Peptidase aspartic (Fragment)	Metarhizium anisopliae ARSEF 549	542	GO:0016021	integral component of membrane [GO:0016021]	PF00026;	SIGNAL 1 28 {ECO:0000256|SAM:SignalP}.	1 out of 5	NULL	KID69412;	NULL
MAN_00479	9836.49	2.64691	0.0877893	30.1507	1.04959e-199	3.87244e-198	16872	16542.9	17931.9	16510.8	2673.88	3028.91	2827.26	2304.28	KID70880.1	251	C-4 sterol methyl oxidase, partial	MAN_00479	A0A0B4F9U0	A0A0B4F9U0_METAN	unreviewed	C-4 sterol methyl oxidase (Fragment)	Metarhizium anisopliae ARSEF 549	251	GO:0005506; GO:0008610; GO:0016491	iron ion binding [GO:0005506]; oxidoreductase activity [GO:0016491]; lipid biosynthetic process [GO:0008610]	PF04116;	NULL	1 out of 5	NULL	KID70880;	K07750
MAN_10489	929.645	-3.13145	0.103945	-30.1261	2.20904e-199	8.12083e-198	190.426	169.102	196.431	206.048	1730.4	1646.57	1797.06	1501.13	KID59683.1	1772	hypothetical protein MAN_10489, partial	MAN_10489	A0A0B4EN57	A0A0B4EN57_METAN	unreviewed	Uncharacterized protein (Fragment)	Metarhizium anisopliae ARSEF 549	1772	NULL	NULL	NULL	SIGNAL 1 18 {ECO:0000256|SAM:SignalP}.	1 out of 5	NULL	KID59683;	NULL
MAN_05696	728.857	-3.40659	0.113242	-30.0824	8.23398e-199	3.01606e-197	122.176	129.645	135.991	116.499	1289.35	1214.79	1336.74	1485.67	KID66037.1	513	hutH-like protein, partial	MAN_05696	A0A0B4FDV6	A0A0B4FDV6_METAN	unreviewed	Histidine ammonia-lyase (EC 4.3.1.3) (Fragment)	Metarhizium anisopliae ARSEF 549	513	GO:0004397; GO:0005737; GO:0019556; GO:0019557	cytoplasm [GO:0005737]; histidine ammonia-lyase activity [GO:0004397]; histidine catabolic process to glutamate and formamide [GO:0019556]; histidine catabolic process to glutamate and formate [GO:0019557]	PF00221;	NULL	2 out of 5	NULL	KID66037;	K01745
MAN_09380	35349.4	10.6123	0.352814	30.0789	9.13487e-199	3.33406e-197	68878.5	68884.8	76487.2	68364.3	32.7455	73.0376	52.2636	22.6819	KID61096.1	397	O-methyltransferase, family 2, partial	MAN_09380	A0A0B4F5G8	A0A0B4F5G8_METAN	unreviewed	O-methyltransferase, family 2 (Fragment)	Metarhizium anisopliae ARSEF 549	397	GO:0008171	O-methyltransferase activity [GO:0008171]	PF00891;	NULL	1 out of 5	NULL	KID61096;	NULL
MAN_04590	587.919	12.5944	1.02422	12.2966	9.44607e-35	4.67392e-34	1135.81	1187.47	1240.29	1139.78	0	0	0	0	KID66309.1	430	P450 monooxygenase, partial	MAN_04590	A0A0B4GDG5	A0A0B4GDG5_METAN	unreviewed	p450 monooxygenase (Fragment)	Metarhizium anisopliae ARSEF 549	430	GO:0004497; GO:0009820; GO:0016765	monooxygenase activity [GO:0004497]; transferase activity, transferring alkyl or aryl (other than methyl) groups [GO:0016765]; alkaloid metabolic process [GO:0009820]	PF11991;	NULL	1 out of 5	NULL	KID66309;	NULL
MAN_01268	14614.3	-2.21316	0.0738796	-29.9563	3.63744e-197	1.31815e-195	5254.4	5240.3	4914.55	5328.54	21189.4	24620.1	24862.4	25504.8	KID71669.1	537	myo-inositol-phosphate synthase, partial	MAN_01268	A0A0B4GUJ8	A0A0B4GUJ8_METAN	unreviewed	Myo-inositol-phosphate synthase (Fragment)	Metarhizium anisopliae ARSEF 549	537	GO:0004512; GO:0006021; GO:0008654	inositol-3-phosphate synthase activity [GO:0004512]; inositol biosynthetic process [GO:0006021]; phospholipid biosynthetic process [GO:0008654]	PF01658;PF07994;	NULL	1 out of 5	NULL	KID71669;	K01858
MAN_07167	121.374	-7.69988	0.90769	-8.48295	2.19562e-17	6.69601e-17	0	0	0	4.34699	266.057	324.373	123.623	252.594	KID63996.1	633	Heat shock protein Hsp70, partial	MAN_07167	A0A0B4FDP0	A0A0B4FDP0_METAN	unreviewed	Heat shock protein Hsp70 (Fragment)	Metarhizium anisopliae ARSEF 549	633	NULL	NULL	NULL	NULL	1 out of 5	NULL	KID63996;	NULL
MAN_09870	1256.29	-2.84211	0.0949511	-29.9323	7.47022e-197	2.68796e-195	314.287	302.505	305.979	306.898	2007.71	2306.05	2061.4	2445.52	KID60337.1	429	amidohydrolase, partial	MAN_09870	A0A0B4EXB0	A0A0B4EXB0_METAN	unreviewed	Amidohydrolase (Fragment)	Metarhizium anisopliae ARSEF 549	429	GO:0016810	hydrolase activity, acting on carbon-nitrogen (but not peptide) bonds [GO:0016810]	PF01979;	NULL	1 out of 5	NULL	KID60337;	NULL
MAN_02689	747.038	3.14891	0.105275	29.9113	1.40233e-196	5.02815e-195	1309.39	1230.69	1473.23	1358	153.495	150.372	156.791	144.339	KID70175.1	258	acetyltransferase, partial	MAN_02689	A0A0B4F7V9	A0A0B4F7V9_METAN	unreviewed	Acetyltransferase (Fragment)	Metarhizium anisopliae ARSEF 549	258	GO:0008080	N-acetyltransferase activity [GO:0008080]	PF13673;	NULL	1 out of 5	NULL	KID70175;	NULL
MAN_05475	3530.19	3.54711	0.118597	29.9089	1.50562e-196	5.37955e-195	6042.22	6027.56	7432.9	6513.54	459.461	595.042	656.31	514.467	KID65816.1	494	Oligopeptide transporter OPT superfamily, partial	MAN_05475	A0A0B4FJ03	A0A0B4FJ03_METAN	unreviewed	Oligopeptide transporter OPT superfamily (Fragment)	Metarhizium anisopliae ARSEF 549	494	GO:0016021; GO:0055085	integral component of membrane [GO:0016021]; transmembrane transport [GO:0055085]	PF03169;	NULL	1 out of 5	NULL	KID65816;	NULL
MAN_10326	1316.54	-2.39329	0.0801488	-29.8606	6.38811e-196	2.27448e-194	426.351	393.633	397.899	463.39	2117.2	2231.94	2217.18	2284.69	KID59874.1	490	hypothetical protein MAN_10326, partial	MAN_10326	A0A0B4FUG5	A0A0B4FUG5_METAN	unreviewed	Uncharacterized protein (Fragment)	Metarhizium anisopliae ARSEF 549	490	NULL	NULL	NULL	NULL	1 out of 5	NULL	KID59874;	NULL
MAN_03596	1144.77	-3.49419	0.117033	-29.8563	7.26825e-196	2.57883e-194	177.787	191.649	162.433	212.133	2389.4	1904.35	2177.98	1942.4	KID68740.1	354	hypothetical protein MAN_03596, partial	MAN_03596	A0A0B4F3M2	A0A0B4F3M2_METAN	unreviewed	Uncharacterized protein (Fragment)	Metarhizium anisopliae ARSEF 549	354	NULL	NULL	NULL	NULL	1 out of 5	NULL	KID68740;	NULL
MAN_04102	1322.75	3.406	0.114416	29.7686	9.95086e-195	3.51839e-193	2325.55	2083.72	2738.7	2522.13	199.543	232.002	244.232	236.098	KID67344.1	548	Amino acid/polyamine transporter I, partial	MAN_04102	A0A0B4GGE0	A0A0B4GGE0_METAN	unreviewed	Amino acid/polyamine transporter I (Fragment)	Metarhizium anisopliae ARSEF 549	548	GO:0015171; GO:0016021	integral component of membrane [GO:0016021]; amino acid transmembrane transporter activity [GO:0015171]	PF13520;	NULL	1 out of 5	NULL	KID67344;	NULL
MAN_05534	16.1393	0.212594	0.522297	0.407036	0.683981	0.719226	18.537	18.7892	6.29587	25.2126	10.233	23.6298	15.076	11.341	KID65875.1	305	C2H2 conidiation transcription factor FlbC, partial	MAN_05534	A0A0B4EV96	A0A0B4EV96_METAN	unreviewed	C2H2 conidiation transcription factor FlbC (Fragment)	Metarhizium anisopliae ARSEF 549	305	GO:0003676	nucleic acid binding [GO:0003676]	NULL	NULL	1 out of 5	NULL	KID65875;	NULL
MAN_05356	2154.36	-2.45296	0.0825029	-29.7319	2.97619e-194	1.04505e-192	669.86	633.195	698.841	661.612	3793.36	3383.36	3984.09	3410.54	KID65697.1	631	Serine/threonine-protein kinase domain protein, partial	MAN_05356	A0A0B4FD08	A0A0B4FD08_METAN	unreviewed	Serine/threonine-protein kinase domain protein (Fragment)	Metarhizium anisopliae ARSEF 549	631	GO:0004672; GO:0005524	ATP binding [GO:0005524]; protein kinase activity [GO:0004672]	PF00069;	NULL	1 out of 5	NULL	KID65697;	K08838
MAN_09112	2453.01	2.70144	0.0909072	29.7165	4.70396e-194	1.64606e-192	4423.6	4281.11	4057.06	4246.14	594.536	770.117	643.244	608.288	KID61347.1	883	aminodeoxychorismate synthase, partial	MAN_09112	A0A0B4F0G2	A0A0B4F0G2_METAN	unreviewed	Aminodeoxychorismate synthase (Fragment)	Metarhizium anisopliae ARSEF 549	883	GO:0009058	biosynthetic process [GO:0009058]	PF04715;PF00425;PF00117;	NULL	1 out of 5	NULL	KID61347;	K13950
MAN_07649	2930.96	-3.46276	0.116588	-29.7007	7.51219e-194	2.61975e-192	430.564	546.765	426.86	543.374	6246.21	5329.6	5039.41	4884.86	KID63448.1	636	sugar transporter, partial	MAN_07649	A0A0B4EZA8	A0A0B4EZA8_METAN	unreviewed	Sugar transporter (Fragment)	Metarhizium anisopliae ARSEF 549	636	GO:0008643; GO:0016021; GO:0022891	integral component of membrane [GO:0016021]; substrate-specific transmembrane transporter activity [GO:0022891]; carbohydrate transport [GO:0008643]	PF00083;	NULL	1 out of 5	NULL	KID63448;	NULL
MAN_10798	4058.95	2.74803	0.0925973	29.6772	1.50999e-193	5.24785e-192	7517.6	7386.96	6624.51	6735.23	1177.82	939.822	965.871	1123.79	KID59306.1	154	Superoxide dismutase (Cu/Zn) / chaperone, partial	MAN_10798	A0A0B4F0B8	A0A0B4F0B8_METAN	unreviewed	Superoxide dismutase (Cu/Zn) / chaperone (Fragment)	Metarhizium anisopliae ARSEF 549	154	GO:0004784; GO:0046872	metal ion binding [GO:0046872]; superoxide dismutase activity [GO:0004784]	PF00080;	NULL	1 out of 5	NULL	KID59306;	K04565
MAN_04806	2274.82	4.18483	0.141205	29.6367	5.03852e-193	1.74514e-191	4396.64	4435.18	4461.25	3957.5	324.385	196.557	230.161	196.92	KID66525.1	422	acid phosphatase, partial	MAN_04806	A0A0B4EXA8	A0A0B4EXA8_METAN	unreviewed	Acid phosphatase (Fragment)	Metarhizium anisopliae ARSEF 549	422	GO:0008152; GO:0016788	hydrolase activity, acting on ester bonds [GO:0016788]; metabolic process [GO:0008152]	PF04185;	SIGNAL 1 18 {ECO:0000256|SAM:SignalP}.	1 out of 5	NULL	KID66525;	NULL
MAN_04192	23792.7	1.42507	0.0481578	29.5916	1.91626e-192	6.61468e-191	34167.1	34429.3	34733	35361.9	12572.2	13574.3	12590.5	12913.2	KID67434.1	480	cross-pathway control 1, partial	MAN_04192	A0A0B4GGN1	A0A0B4GGN1_METAN	unreviewed	Cross-pathway control 1 (Fragment)	Metarhizium anisopliae ARSEF 549	480	GO:0003700	transcription factor activity, sequence-specific DNA binding [GO:0003700]	PF07716;	NULL	1 out of 5	NULL	KID67434;	NULL
MAN_08873	1972.31	3.60583	0.121875	29.5863	2.24004e-192	7.7062e-191	3717.51	3543.64	3632.71	3686.25	344.851	357.669	243.227	252.594	KID61634.1	518	Low affinity iron permease, Fet4, partial	MAN_08873	A0A0B4FZH8	A0A0B4FZH8_METAN	unreviewed	Low affinity iron permease, Fet4 (Fragment)	Metarhizium anisopliae ARSEF 549	518	GO:0016021; GO:0055085	integral component of membrane [GO:0016021]; transmembrane transport [GO:0055085]	PF04120;	NULL	1 out of 5	NULL	KID61634;	K19792
MAN_07549	13027.4	1.7477	0.0590778	29.5831	2.46633e-192	8.45611e-191	20245.8	20467	20022.1	19571	5500.22	5971.9	6200.27	6240.62	KID63348.1	666	acetyl-coenzyme A synthetase, partial	MAN_07549	A0A0B4EZ09	A0A0B4EZ09_METAN	unreviewed	Acetyl-coenzyme A synthetase (EC 6.2.1.1) (Fragment)	Metarhizium anisopliae ARSEF 549	666	GO:0003987; GO:0005524; GO:0016208; GO:0019427	acetate-CoA ligase activity [GO:0003987]; AMP binding [GO:0016208]; ATP binding [GO:0005524]; acetyl-CoA biosynthetic process from acetate [GO:0019427]	PF16177;PF00501;PF13193;	NULL	2 out of 5	NULL	KID63348;	K01895
MAN_00464	631.536	-3.58862	0.121532	-29.5281	1.25638e-191	4.2932e-190	87.6295	94.8852	88.1421	115.63	1061.16	1178.27	1214.12	1212.45	KID70865.1	658	Copper amine oxidase, partial	MAN_00464	A0A0B4F9S7	A0A0B4F9S7_METAN	unreviewed	Amine oxidase (EC 1.4.3.-) (Fragment)	Metarhizium anisopliae ARSEF 549	658	GO:0005507; GO:0008131; GO:0009308; GO:0048038	copper ion binding [GO:0005507]; primary amine oxidase activity [GO:0008131]; quinone binding [GO:0048038]; amine metabolic process [GO:0009308]	PF01179;PF02727;PF09248;	SIGNAL 1 22 {ECO:0000256|SAM:SignalP}.	2 out of 5	NULL	KID70865;	K00276
MAN_03032	3485.62	-2.07347	0.0703167	-29.4876	4.14933e-191	1.41313e-189	1311.91	1285.18	1371.24	1385.82	5271.01	6086.82	5432.4	5740.59	KID68176.1	685	hypothetical protein MAN_03032, partial	MAN_03032	A0A0B4FQY9	A0A0B4FQY9_METAN	unreviewed	Uncharacterized protein (Fragment)	Metarhizium anisopliae ARSEF 549	685	GO:0000226; GO:0015630; GO:0016021	integral component of membrane [GO:0016021]; microtubule cytoskeleton [GO:0015630]; microtubule cytoskeleton organization [GO:0000226]	NULL	NULL	1 out of 5	NULL	KID68176;	NULL
MAN_06428	1686.49	-5.04051	0.171227	-29.4376	1.81355e-190	6.15578e-189	101.111	98.6431	75.5504	119.977	2613.5	3333.95	2906.66	4242.55	KID64254.1	428	endoglucanase, partial	MAN_06428	A0A0B4G779	A0A0B4G779_METAN	unreviewed	Endoglucanase (Fragment)	Metarhizium anisopliae ARSEF 549	428	NULL	NULL	NULL	NULL	1 out of 5	NULL	KID64254;	NULL
MAN_04224	15883.5	-1.70408	0.0579843	-29.3886	7.67403e-190	2.59617e-188	7372.67	7510.97	7124.4	7828.94	23763	23574	25867.5	24026.3	KID67466.1	448	beta-tubulin, partial	MAN_04224	A0A0B4FP38	A0A0B4FP38_METAN	unreviewed	Tubulin beta chain (Fragment)	Metarhizium anisopliae ARSEF 549	448	GO:0003924; GO:0005200; GO:0005525; GO:0005737; GO:0005874; GO:0007017	cytoplasm [GO:0005737]; microtubule [GO:0005874]; GTP binding [GO:0005525]; GTPase activity [GO:0003924]; structural constituent of cytoskeleton [GO:0005200]; microtubule-based process [GO:0007017]	PF00091;PF03953;	NULL	2 out of 5	NULL	KID67466;	K07375
MAN_02715	851.228	-5.37163	0.182877	-29.373	1.21603e-189	4.10029e-188	25.2777	39.4572	41.5527	54.7721	1635.23	1921.53	1397.05	1694.96	KID70201.1	505	MFS transporter, partial	MAN_02715	A0A0B4FX00	A0A0B4FX00_METAN	unreviewed	MFS transporter (Fragment)	Metarhizium anisopliae ARSEF 549	505	GO:0016021; GO:0055085	integral component of membrane [GO:0016021]; transmembrane transport [GO:0055085]	PF07690;	NULL	1 out of 5	NULL	KID70201;	NULL
MAN_05701	5699.72	1.86966	0.0636856	29.3576	1.911e-189	6.42236e-188	9365.4	9178.5	8622.82	8633.13	2349.49	2611.09	2482.52	2354.8	KID66042.1	601	isocitrate lyase, partial	MAN_05701	A0A0B4FDV9	A0A0B4FDV9_METAN	unreviewed	Isocitrate lyase (Fragment)	Metarhizium anisopliae ARSEF 549	601	GO:0004451; GO:0019752	isocitrate lyase activity [GO:0004451]; carboxylic acid metabolic process [GO:0019752]	PF00463;	NULL	1 out of 5	NULL	KID66042;	K01637
MAN_03792	825.633	3.98112	0.112665	35.3358	1.65827e-273	1.11093e-271	1581.54	1520.98	1431.68	1677.07	101.306	104.186	94.4765	93.8206	KID67034.1	373	Alcohol dehydrogenase superfamily, zinc-type, partial	MAN_03792	A0A0B4GFS4	A0A0B4GFS4_METAN	unreviewed	Alcohol dehydrogenase superfamily, zinc-type (Fragment)	Metarhizium anisopliae ARSEF 549	373	GO:0016491	oxidoreductase activity [GO:0016491]	NULL	NULL	1 out of 5	NULL	KID67034;	NULL
MAN_06117	3403.35	-4.4637	0.15213	-29.3414	3.07754e-189	1.02749e-187	256.99	289.353	239.243	392.099	6147.97	5810.79	7924.97	6165.36	KID65106.1	743	neutral ceramidase precursor, partial	MAN_06117	A0A0B4FH27	A0A0B4FH27_METAN	unreviewed	Neutral ceramidase (Fragment)	Metarhizium anisopliae ARSEF 549	743	NULL	NULL	PF04734;PF17048;	SIGNAL 1 26 {ECO:0000256|SAM:SignalP}.	1 out of 5	NULL	KID65106;	K12349
MAN_04989	2756.09	-2.54867	0.0875032	-29.1266	1.65556e-186	5.50934e-185	749.064	768.477	773.132	925.91	4802.34	4944	4730.86	4354.93	KID66708.1	759	Transient receptor potential (TRP) domain containing protein, partial	MAN_04989	A0A0B4F875	A0A0B4F875_METAN	unreviewed	Transient receptor potential (TRP) domain containing protein (Fragment)	Metarhizium anisopliae ARSEF 549	759	GO:0016021	integral component of membrane [GO:0016021]	PF06011;PF14558;	SIGNAL 1 27 {ECO:0000256|SAM:SignalP}.	1 out of 5	NULL	KID66708;	NULL
MAN_07818	654.704	5.69527	0.195685	29.1043	3.16644e-186	1.05029e-184	1300.96	1225.99	1274.28	1337.14	13.3029	22.5557	20.1014	43.3018	KID62602.1	282	bZIP transcription factor, partial	MAN_07818	A0A0B4F4B4	A0A0B4F4B4_METAN	unreviewed	BZIP transcription factor (Fragment)	Metarhizium anisopliae ARSEF 549	282	NULL	NULL	NULL	NULL	1 out of 5	NULL	KID62602;	NULL
MAN_02213	946.529	3.1782	0.109221	29.0989	3.70497e-186	1.22493e-184	1751.75	1660.02	1684.77	1723.15	205.683	150.372	217.095	179.393	KID69699.1	448	hypothetical protein MAN_02213, partial	MAN_02213	A0A0B4GNA9	A0A0B4GNA9_METAN	unreviewed	Uncharacterized protein (Fragment)	Metarhizium anisopliae ARSEF 549	448	NULL	NULL	NULL	NULL	1 out of 5	NULL	KID69699;	NULL
MAN_01882	6183.4	-1.97761	0.0679781	-29.0919	4.54104e-186	1.49649e-184	2577.49	2359.92	2447.83	2629.06	9376.47	10385.3	9387.34	10303.8	KID69368.1	632	Flavoprotein transmembrane component, partial	MAN_01882	A0A0B4FFY9	A0A0B4FFY9_METAN	unreviewed	Flavoprotein transmembrane component (Fragment)	Metarhizium anisopliae ARSEF 549	632	GO:0000293; GO:0016021	integral component of membrane [GO:0016021]; ferric-chelate reductase activity [GO:0000293]	PF08022;PF01794;PF08030;	NULL	1 out of 5	NULL	KID69368;	NULL
MAN_07525	607.777	-4.94305	0.169992	-29.0782	6.77519e-186	2.22554e-184	37.074	31.9416	27.7018	53.9027	1245.35	1293.2	1090.5	1082.55	KID63324.1	213	amine oxidase, partial	MAN_07525	A0A0B4G4G4	A0A0B4G4G4_METAN	unreviewed	Amine oxidase (Fragment)	Metarhizium anisopliae ARSEF 549	213	GO:0016491	oxidoreductase activity [GO:0016491]	NULL	NULL	1 out of 5	NULL	KID63324;	NULL
MAN_07561	1854.4	-3.52875	0.121564	-29.0279	2.9218e-185	9.56678e-184	313.444	263.048	271.981	332.11	2925.61	3495.06	3220.24	4013.67	KID63360.1	441	proteinrelated to glucan 1, 4-alpha-glucosidase, partial	MAN_07561	A0A0B4EMR4	A0A0B4EMR4_METAN	unreviewed	Proteinrelated to glucan 1, 4-alpha-glucosidase (Fragment)	Metarhizium anisopliae ARSEF 549	441	NULL	NULL	NULL	NULL	1 out of 5	NULL	KID63360;	NULL
MAN_05657	1303.57	2.68188	0.092438	29.0128	4.54103e-185	1.48209e-183	2175.57	2074.32	2442.8	2329.99	318.246	373.781	343.734	370.128	KID65998.1	251	short-chain dehydrogenase, partial	MAN_05657	A0A0B4F698	A0A0B4F698_METAN	unreviewed	Short-chain dehydrogenase (Fragment)	Metarhizium anisopliae ARSEF 549	251	GO:0016491	oxidoreductase activity [GO:0016491]	PF00106;	NULL	1 out of 5	NULL	KID65998;	NULL
MAN_00674	1878.26	0.475629	0.10262	4.63486	3.57176e-06	6.55692e-06	2138.5	2119.42	2287.92	2195.23	1734.49	1459.68	1322.67	1768.16	KID71075.1	727	C2H2 finger domain protein, partial	MAN_00674	A0A0B4FAH0	A0A0B4FAH0_METAN	unreviewed	C2H2 finger domain protein (Fragment)	Metarhizium anisopliae ARSEF 549	727	GO:0003677; GO:0005634; GO:0006351; GO:0008270	nucleus [GO:0005634]; DNA binding [GO:0003677]; zinc ion binding [GO:0008270]; transcription, DNA-templated [GO:0006351]	PF04082;	NULL	1 out of 5	NULL	KID71075;	NULL
MAN_01131	2428.78	-4.62488	0.159661	-28.9669	1.71977e-184	5.57722e-183	162.62	200.105	132.213	258.211	4251.8	4456.37	5145.95	4823	KID71532.1	179	GPI anchored serine-threonine rich protein, partial	MAN_01131	A0A0B4FV03	A0A0B4FV03_METAN	unreviewed	GPI anchored serine-threonine rich protein (Fragment)	Metarhizium anisopliae ARSEF 549	179	NULL	NULL	NULL	SIGNAL 1 17 {ECO:0000256|SAM:SignalP}.	1 out of 5	NULL	KID71532;	NULL
MAN_07026	451.838	4.00489	0.138278	28.9626	1.94988e-184	6.30337e-183	845.119	855.846	894.013	807.671	44.0018	61.2227	55.2788	51.5498	KID63855.1	181	basic leucine zipper transcription factor domain-containing protein, partial	MAN_07026	A0A0B4EP72	A0A0B4EP72_METAN	unreviewed	Basic leucine zipper transcription factor domain-containing protein (Fragment)	Metarhizium anisopliae ARSEF 549	181	GO:0003700	transcription factor activity, sequence-specific DNA binding [GO:0003700]	NULL	NULL	1 out of 5	NULL	KID63855;	NULL
MAN_00086	1681.7	-4.85561	0.168136	-28.879	2.19022e-183	7.05791e-182	77.5184	98.6431	108.289	164.316	3216.22	3311.4	3099.63	3377.54	KID70487.1	246	hypothetical protein MAN_00086, partial	MAN_00086	A0A0B4FRY8	A0A0B4FRY8_METAN	unreviewed	Uncharacterized protein (Fragment)	Metarhizium anisopliae ARSEF 549	246	GO:0016021	integral component of membrane [GO:0016021]	NULL	SIGNAL 1 19 {ECO:0000256|SAM:SignalP}.	1 out of 5	NULL	KID70487;	NULL
MAN_05146	8261.86	-3.26934	0.113462	-28.8146	1.40952e-182	4.5278e-181	1358.26	1527.56	1581.52	1744.01	13260.9	15511.9	13371.4	17739.3	KID66865.1	988	Methyltransferase type 11, partial	MAN_05146	A0A0B4EY91	A0A0B4EY91_METAN	unreviewed	Methyltransferase type 11 (Fragment)	Metarhizium anisopliae ARSEF 549	988	GO:0008168	methyltransferase activity [GO:0008168]	PF08241;	NULL	1 out of 5	NULL	KID66865;	NULL
MAN_10466	1223.62	-2.709	0.0940932	-28.7906	2.81312e-182	9.00818e-181	296.592	292.171	358.864	353.845	2261.49	2051.5	2077.48	2097.05	KID59660.1	881	Pyridoxal phosphate-dependent decarboxylase, partial	MAN_10466	A0A0B4EBT7	A0A0B4EBT7_METAN	unreviewed	Pyridoxal phosphate-dependent decarboxylase (Fragment)	Metarhizium anisopliae ARSEF 549	881	GO:0016831; GO:0019752; GO:0030170	carboxy-lyase activity [GO:0016831]; pyridoxal phosphate binding [GO:0030170]; carboxylic acid metabolic process [GO:0019752]	PF00248;PF00282;	NULL	1 out of 5	NULL	KID59660;	K01580
MAN_01279	5358.33	3.20789	0.111502	28.7698	5.11901e-182	1.63407e-180	9457.24	8808.36	9244.85	11169.2	1149.16	1177.19	890.491	970.167	KID71680.1	350	chitosanase precursor, partial	MAN_01279	A0A0B4FCC7	A0A0B4FCC7_METAN	unreviewed	Endo-chitosanase (EC 3.2.1.132) (Fragment)	Metarhizium anisopliae ARSEF 549	350	GO:0000272; GO:0005576; GO:0016977	extracellular region [GO:0005576]; chitosanase activity [GO:0016977]; polysaccharide catabolic process [GO:0000272]	PF07335;	SIGNAL 1 20 {ECO:0000256|RuleBase:RU361208}.	2 out of 5	NULL	KID71680;	NULL
MAN_08792	4323.11	-3.18793	0.110836	-28.7626	6.3022e-182	2.00548e-180	832.48	824.844	860.015	902.436	7976.6	8880.51	6161.07	8146.93	KID61553.1	432	hypothetical protein MAN_08792, partial	MAN_08792	A0A0B4EU29	A0A0B4EU29_METAN	unreviewed	Uncharacterized protein (Fragment)	Metarhizium anisopliae ARSEF 549	432	NULL	NULL	PF14388;	SIGNAL 1 18 {ECO:0000256|SAM:SignalP}.	1 out of 5	NULL	KID61553;	NULL
MAN_10799	7886.74	-1.45676	0.0507498	-28.7048	3.32662e-181	1.05529e-179	4093.31	4315.87	4109.94	4327	11902	11194.1	11523.1	11628.6	KID59307.1	885	RNA-induced silencing complex, nuclease component Tudor-SN, partial	MAN_10799	A0A0B4EU47	A0A0B4EU47_METAN	unreviewed	RNA-induced silencing complex, nuclease component Tudor-SN (Fragment)	Metarhizium anisopliae ARSEF 549	885	GO:0016442; GO:0031047	RISC complex [GO:0016442]; gene silencing by RNA [GO:0031047]	PF00565;PF00567;	NULL	1 out of 5	NULL	KID59307;	K15979
MAN_01403	18821.2	2.43066	0.0848669	28.6409	2.08291e-180	6.58704e-179	30558.3	30047.6	34138.7	32266.9	5560.6	6740.94	5858.55	5398.3	KID71804.1	106	Cytochrome c domain protein, partial	MAN_01403	A0A0B4GUY6	A0A0B4GUY6_METAN	unreviewed	Cytochrome c domain protein (Fragment)	Metarhizium anisopliae ARSEF 549	106	GO:0005739; GO:0009055; GO:0020037; GO:0046872; GO:0055114; GO:0070469	mitochondrion [GO:0005739]; respiratory chain [GO:0070469]; electron carrier activity [GO:0009055]; heme binding [GO:0020037]; metal ion binding [GO:0046872]; oxidation-reduction process [GO:0055114]	PF00034;	NULL	2 out of 5	NULL	KID71804;	K08738
MAN_06284	727.349	-3.58603	0.125392	-28.5985	7.02194e-180	2.21376e-178	123.018	80.7934	117.103	126.063	1368.15	1349.05	1286.49	1368.13	KID65273.1	499	FAD dependent oxidoreductase, partial	MAN_06284	A0A0B4F453	A0A0B4F453_METAN	unreviewed	FAD dependent oxidoreductase (Fragment)	Metarhizium anisopliae ARSEF 549	499	GO:0016491	oxidoreductase activity [GO:0016491]	PF01266;	NULL	1 out of 5	NULL	KID65273;	NULL
MAN_07464	4184.67	2.91977	0.10218	28.5749	1.37964e-179	4.33607e-178	7482.21	7819.11	7347.27	6921.28	869.803	1031.12	1150.8	855.727	KID63263.1	374	inositolphosphorylceramide-B C-26 hydroxylase, partial	MAN_07464	A0A0B4EYS9	A0A0B4EYS9_METAN	unreviewed	Inositolphosphorylceramide-B C-26 hydroxylase (Fragment)	Metarhizium anisopliae ARSEF 549	374	GO:0005506; GO:0008610; GO:0016021; GO:0020037; GO:0080132	integral component of membrane [GO:0016021]; fatty acid alpha-hydroxylase activity [GO:0080132]; heme binding [GO:0020037]; iron ion binding [GO:0005506]; lipid biosynthetic process [GO:0008610]	PF00173;PF04116;	NULL	1 out of 5	NULL	KID63263;	K19703
MAN_05661	2469.73	-2.52539	0.088459	-28.5486	2.92048e-179	9.15053e-178	765.915	656.681	726.543	773.765	4458.51	3955.85	4539.9	3880.67	KID66002.1	592	ascorbase and Cu-oxidase, partial	MAN_05661	A0A0B4FDN7	A0A0B4FDN7_METAN	unreviewed	Ascorbase and Cu-oxidase (Fragment)	Metarhizium anisopliae ARSEF 549	592	GO:0005507; GO:0016491	copper ion binding [GO:0005507]; oxidoreductase activity [GO:0016491]	PF00394;PF07731;PF07732;	NULL	1 out of 5	NULL	KID66002;	NULL
MAN_06562	683.379	-5.01447	0.175761	-28.5301	4.95833e-179	1.54879e-177	30.3333	41.3361	32.7385	58.2497	1220.79	1518.75	1210.1	1354.73	KID64388.1	1205	Ankyrin repeat-containing domain protein, partial	MAN_06562	A0A0B4F1S0	A0A0B4F1S0_METAN	unreviewed	Ankyrin repeat-containing domain protein (Fragment)	Metarhizium anisopliae ARSEF 549	1205	GO:0003824; GO:0009116	catalytic activity [GO:0003824]; nucleoside metabolic process [GO:0009116]	PF00023;PF12796;PF01048;	NULL	1 out of 5	NULL	KID64388;	NULL
MAN_05817	2823.89	-2.30039	0.0806453	-28.5248	5.76522e-179	1.79533e-177	950.443	1011.8	997.265	855.488	4464.65	4573.44	4624.32	5113.74	KID64806.1	557	NADPH oxidase, partial	MAN_05817	A0A0B4FG51	A0A0B4FG51_METAN	unreviewed	NADPH oxidase (Fragment)	Metarhizium anisopliae ARSEF 549	557	GO:0016021; GO:0016491	integral component of membrane [GO:0016021]; oxidoreductase activity [GO:0016491]	PF08022;PF01794;PF08030;	NULL	1 out of 5	NULL	KID64806;	K08008
MAN_02954	1771.03	-4.1982	0.147551	-28.4526	4.52282e-178	1.40414e-176	182.842	146.555	161.174	239.085	2934.82	3084.76	3797.15	3621.89	KID68098.1	374	catalytic protein, partial	MAN_02954	A0A0B4FC86	A0A0B4FC86_METAN	unreviewed	Catalytic protein (Fragment)	Metarhizium anisopliae ARSEF 549	374	NULL	NULL	PF12697;	SIGNAL 1 16 {ECO:0000256|SAM:SignalP}.	1 out of 5	NULL	KID68098;	NULL
MAN_02069	1284.43	-2.36781	0.0832587	-28.4392	6.62037e-178	2.04909e-176	404.444	455.637	394.121	412.095	1983.15	2207.24	2242.31	2176.43	KID69555.1	837	Cytochrome b561/ferric reductase transmembrane, partial	MAN_02069	A0A0B4F671	A0A0B4F671_METAN	unreviewed	Cytochrome b561/ferric reductase transmembrane (Fragment)	Metarhizium anisopliae ARSEF 549	837	GO:0016021; GO:0055114	integral component of membrane [GO:0016021]; oxidation-reduction process [GO:0055114]	NULL	NULL	1 out of 5	NULL	KID69555;	NULL
MAN_04554	5598.01	-2.49586	0.0878858	-28.3989	2.08896e-177	6.44602e-176	1712.15	1694.78	1533.67	1799.66	9015.25	8495.99	10380.3	10152.2	KID66273.1	620	N-acetylglucosaminidase, partial	MAN_04554	A0A0B4F6X8	A0A0B4F6X8_METAN	unreviewed	N-acetylglucosaminidase (Fragment)	Metarhizium anisopliae ARSEF 549	620	GO:0004563; GO:0005975	beta-N-acetylhexosaminidase activity [GO:0004563]; carbohydrate metabolic process [GO:0005975]	PF00728;PF14845;	SIGNAL 1 20 {ECO:0000256|SAM:SignalP}.	1 out of 5	NULL	KID66273;	K12373
MAN_05695	565.137	-4.56132	0.160655	-28.392	2.53943e-177	7.8124e-176	48.8703	36.6389	46.5894	51.2945	941.434	1053.67	1072.41	1270.19	KID66036.1	279	methyltransferase type 12, partial	MAN_05695	A0A0B4FJS4	A0A0B4FJS4_METAN	unreviewed	Methyltransferase type 12 (Fragment)	Metarhizium anisopliae ARSEF 549	279	GO:0008168	methyltransferase activity [GO:0008168]	NULL	NULL	1 out of 5	NULL	KID66036;	NULL
MAN_05848	4006.01	-2.26515	0.0798366	-28.3723	4.44285e-177	1.3627e-175	1323.71	1392.28	1391.39	1411.9	6046.66	7477.76	6458.57	6545.79	KID64837.1	840	serine-rich protein, partial	MAN_05848	A0A0B4FAS1	A0A0B4FAS1_METAN	unreviewed	Serine-rich protein (Fragment)	Metarhizium anisopliae ARSEF 549	840	GO:0016021	integral component of membrane [GO:0016021]	NULL	NULL	1 out of 5	NULL	KID64837;	NULL
MAN_01447	2819.83	-2.86955	0.10123	-28.3468	9.16324e-177	2.80208e-175	599.082	743.111	663.584	709.429	4372.55	5624.97	4880.61	4965.28	KID71848.1	1607	WD domain, G-beta repeat protein, partial	MAN_01447	A0A0B4FN71	A0A0B4FN71_METAN	unreviewed	WD domain, G-beta repeat protein (Fragment)	Metarhizium anisopliae ARSEF 549	1607	GO:0003712; GO:0008134	transcription cofactor activity [GO:0003712]; transcription factor binding [GO:0008134]	NULL	NULL	1 out of 5	NULL	KID71848;	NULL
MAN_05369	1341.53	2.88778	0.101932	28.3304	1.45908e-176	4.44844e-175	2352.51	2240.61	2399.98	2462.14	317.222	272.817	306.546	380.438	KID65710.1	599	Bicarbonate transporter, eukaryotic, partial	MAN_05369	A0A0B4EUU2	A0A0B4EUU2_METAN	unreviewed	Bicarbonate transporter, eukaryotic (Fragment)	Metarhizium anisopliae ARSEF 549	599	GO:0005452; GO:0016021	integral component of membrane [GO:0016021]; inorganic anion exchanger activity [GO:0005452]	PF00955;	NULL	1 out of 5	NULL	KID65710;	NULL
MAN_03957	42586	2.53224	0.0893913	28.3276	1.5801e-176	4.80303e-175	74131.2	70918.7	70405.4	75018.7	10955.4	12215.5	14669	12374	KID67199.1	1381	Plasma membrane ATPase (Proton pump), partial	MAN_03957	A0A0B4GG32	A0A0B4GG32_METAN	unreviewed	Plasma membrane ATPase (Proton pump) (Fragment)	Metarhizium anisopliae ARSEF 549	1381	GO:0005524; GO:0006754; GO:0016021; GO:0016887	integral component of membrane [GO:0016021]; ATP binding [GO:0005524]; ATPase activity [GO:0016887]; ATP biosynthetic process [GO:0006754]	PF00690;	NULL	1 out of 5	NULL	KID67199;	K01535
MAN_02411	594.014	-4.18461	0.147799	-28.3129	2.39995e-176	7.27342e-175	64.0369	51.6702	50.3669	79.1153	1001.81	1182.56	1210.1	1112.44	KID69897.1	251	Protein kinase-like domain protein, partial	MAN_02411	A0A0B4FQ52	A0A0B4FQ52_METAN	unreviewed	Protein kinase-like domain protein (Fragment)	Metarhizium anisopliae ARSEF 549	251	GO:0016301	kinase activity [GO:0016301]	NULL	NULL	1 out of 5	NULL	KID69897;	NULL
MAN_02099	1361.23	-4.42817	0.156604	-28.2762	6.78417e-176	2.04995e-174	81.7313	117.432	138.509	147.798	2680.02	2490.8	2949.88	2283.66	KID69585.1	323	hypothetical protein MAN_02099, partial	MAN_02099	A0A0B4F694	A0A0B4F694_METAN	unreviewed	Uncharacterized protein (Fragment)	Metarhizium anisopliae ARSEF 549	323	NULL	NULL	NULL	NULL	1 out of 5	NULL	KID69585;	NULL
MAN_00697	1174.19	-4.23457	0.149786	-28.2708	7.90376e-176	2.38118e-174	114.592	102.401	95.6972	158.231	2041.48	2607.87	2166.93	2106.33	KID71098.1	542	RNA binding protein MSSP-2, partial	MAN_00697	A0A0B4FKZ5	A0A0B4FKZ5_METAN	unreviewed	RNA binding protein MSSP-2 (Fragment)	Metarhizium anisopliae ARSEF 549	542	GO:0003723	RNA binding [GO:0003723]	PF00076;	NULL	1 out of 5	NULL	KID71098;	NULL
MAN_02355	4638.81	-4.84151	0.171361	-28.2532	1.2986e-175	3.90078e-174	282.268	237.683	279.536	449.479	8075.86	9052.37	8068.69	10664.6	KID69841.1	259	malate dehydrogenase, partial	MAN_02355	A0A0B4FVX1	A0A0B4FVX1_METAN	unreviewed	Malate dehydrogenase (Fragment)	Metarhizium anisopliae ARSEF 549	259	NULL	NULL	PF11937;	SIGNAL 1 17 {ECO:0000256|SAM:SignalP}.	1 out of 5	NULL	KID69841;	NULL
MAN_08732	3804.48	-3.99895	0.141711	-28.219	3.42049e-175	1.02146e-173	371.583	383.299	488.559	549.46	8571.14	7024.5	6111.82	6935.51	KID62053.1	655	hypothetical protein MAN_08732, partial	MAN_08732	A0A0B4EVJ9	A0A0B4EVJ9_METAN	unreviewed	Uncharacterized protein (Fragment)	Metarhizium anisopliae ARSEF 549	655	NULL	NULL	NULL	NULL	1 out of 5	NULL	KID62053;	NULL
MAN_09616	1595.33	2.6464	0.0937809	28.219	3.42057e-175	1.02146e-173	2819.31	2740.4	2678.26	2766.43	377.597	452.189	419.114	509.312	KID60888.1	761	beta-1,3-glucanase precursor, partial	MAN_09616	A0A0B4ERU0	A0A0B4ERU0_METAN	unreviewed	Beta-1,3-glucanase (Fragment)	Metarhizium anisopliae ARSEF 549	761	NULL	NULL	PF12708;	SIGNAL 1 20 {ECO:0000256|SAM:SignalP}.	1 out of 5	NULL	KID60888;	NULL
MAN_10800	13611.7	2.91102	0.103185	28.2117	4.1986e-175	1.25013e-173	23979.3	26687.2	20888.4	24559.6	3565.17	2890.36	2863.44	3460.02	KID59308.1	329	transaldolase, partial	MAN_10800	A0A0B4ELY8	A0A0B4ELY8_METAN	unreviewed	Transaldolase (EC 2.2.1.2) (Fragment)	Metarhizium anisopliae ARSEF 549	329	GO:0004801; GO:0005737; GO:0005975; GO:0006098	cytoplasm [GO:0005737]; sedoheptulose-7-phosphate:D-glyceraldehyde-3-phosphate glyceronetransferase activity [GO:0004801]; carbohydrate metabolic process [GO:0005975]; pentose-phosphate shunt [GO:0006098]	PF00923;	NULL	2 out of 5	NULL	KID59308;	K00616
MAN_02194	4181.52	-2.7777	0.0985064	-28.1982	6.1532e-175	1.82677e-173	1040.6	1029.65	1006.08	1178.9	7070.99	7393.98	6351.03	8380.97	KID69680.1	199	hypothetical protein MAN_02194, partial	MAN_02194	A0A0B4F6H0	A0A0B4F6H0_METAN	unreviewed	Uncharacterized protein (Fragment)	Metarhizium anisopliae ARSEF 549	199	NULL	NULL	NULL	NULL	1 out of 5	NULL	KID69680;	NULL
MAN_10147	1602.15	3.98438	0.141394	28.1792	1.05257e-174	3.11579e-173	3066.19	2948.02	2859.58	3181.13	237.405	216.965	134.679	173.207	KID60117.1	236	hypothetical protein MAN_10147, partial	MAN_10147	A0A0B4EWP2	A0A0B4EWP2_METAN	unreviewed	Uncharacterized protein (Fragment)	Metarhizium anisopliae ARSEF 549	236	NULL	NULL	NULL	NULL	1 out of 5	NULL	KID60117;	NULL
MAN_04831	9390.01	1.71562	0.0609439	28.1508	2.34346e-174	6.91694e-173	15122.8	14585.1	13519.7	14357.3	4274.31	4323.18	4278.58	4659.07	KID66550.1	478	Histidine phosphatase superfamily, clade-2, partial	MAN_04831	A0A0B4EXG1	A0A0B4EXG1_METAN	unreviewed	Histidine phosphatase superfamily, clade-2 (Fragment)	Metarhizium anisopliae ARSEF 549	478	GO:0003993; GO:0016021	integral component of membrane [GO:0016021]; acid phosphatase activity [GO:0003993]	PF00328;	SIGNAL 1 20 {ECO:0000256|SAM:SignalP}.	1 out of 5	NULL	KID66550;	NULL
MAN_09264	3977.48	-4.15234	0.147716	-28.1103	7.33084e-174	2.15751e-172	394.333	418.998	399.158	480.778	9574.99	8096.43	5766.08	6689.1	KID60980.1	762	hypothetical protein MAN_09264, partial	MAN_09264	A0A0B4EFQ8	A0A0B4EFQ8_METAN	unreviewed	Uncharacterized protein (Fragment)	Metarhizium anisopliae ARSEF 549	762	NULL	NULL	NULL	NULL	1 out of 5	NULL	KID60980;	NULL
MAN_02690	1670.49	-4.66078	0.165808	-28.1094	7.51254e-174	2.20462e-172	98.5832	104.28	122.14	182.574	2889.79	3104.1	3232.3	3630.14	KID70176.1	885	subtilisin-like serine protease PR1C, partial	MAN_02690	A0A0B4FWX4	A0A0B4FWX4_METAN	unreviewed	Subtilisin-like serine protease PR1C (Fragment)	Metarhizium anisopliae ARSEF 549	885	GO:0004252; GO:0005618; GO:0016020	cell wall [GO:0005618]; membrane [GO:0016020]; serine-type endopeptidase activity [GO:0004252]	PF06280;PF02225;PF00082;	SIGNAL 1 19 {ECO:0000256|SAM:SignalP}.	1 out of 5	NULL	KID70176;	NULL
MAN_09801	564.089	4.75321	0.169249	28.0842	1.52978e-173	4.47637e-172	1037.23	1094.47	1241.54	978.074	51.1649	46.1855	35.1774	28.8679	KID60666.1	578	Pyoverdine biosynthesis, partial	MAN_09801	A0A0B4F451	A0A0B4F451_METAN	unreviewed	Pyoverdine biosynthesis (Fragment)	Metarhizium anisopliae ARSEF 549	578	NULL	NULL	PF05141;	NULL	1 out of 5	NULL	KID60666;	NULL
MAN_04765	863.479	2.47058	0.0880861	28.0473	4.3068e-173	1.25662e-171	1498.97	1446.77	1479.53	1426.68	280.384	258.854	235.186	281.462	KID66484.1	183	3-hydroxyanthranilate 3,4-dioxygenase, partial	MAN_04765	A0A0B4GE20	A0A0B4GE20_METAN	unreviewed	3-hydroxyanthranilate 3,4-dioxygenase (Fragment)	Metarhizium anisopliae ARSEF 549	183	GO:0000334; GO:0005506	3-hydroxyanthranilate 3,4-dioxygenase activity [GO:0000334]; iron ion binding [GO:0005506]	PF06052;	NULL	1 out of 5	NULL	KID66484;	K00452
MAN_06679	494.436	-6.29908	0.224989	-27.9973	1.75088e-172	5.09407e-171	9.2685	9.39458	13.8509	17.388	1011.02	938.748	1038.24	917.587	KID64505.1	518	subtilisin-like serine protease, partial	MAN_06679	A0A0B4ER93	A0A0B4ER93_METAN	unreviewed	Subtilisin-like serine protease (Fragment)	Metarhizium anisopliae ARSEF 549	518	GO:0008233	peptidase activity [GO:0008233]	NULL	SIGNAL 1 26 {ECO:0000256|SAM:SignalP}.	1 out of 5	NULL	KID64505;	NULL
MAN_07523	557.167	-4.30526	0.153829	-27.9874	2.31095e-172	6.7044e-171	47.1851	45.094	62.9587	60.8579	975.202	1225.53	1072.41	968.105	KID63322.1	443	Major facilitator superfamily domain, general substrate transporter, partial	MAN_07523	A0A0B4F697	A0A0B4F697_METAN	unreviewed	Major facilitator superfamily domain, general substrate transporter (Fragment)	Metarhizium anisopliae ARSEF 549	443	GO:0016021; GO:0055085	integral component of membrane [GO:0016021]; transmembrane transport [GO:0055085]	PF07690;	NULL	1 out of 5	NULL	KID63322;	NULL
MAN_06250	4101.8	1.89921	0.0678966	27.9722	3.54531e-172	1.02562e-170	6425.6	6324.43	6715.17	6411.82	1792.82	1871.05	1675.45	1598.04	KID65239.1	554	GMP synthase, partial	MAN_06250	A0A0B4GA86	A0A0B4GA86_METAN	unreviewed	GMP synthase (Fragment)	Metarhizium anisopliae ARSEF 549	554	GO:0003922; GO:0005524; GO:0006177; GO:0016462	ATP binding [GO:0005524]; GMP synthase (glutamine-hydrolyzing) activity [GO:0003922]; pyrophosphatase activity [GO:0016462]; GMP biosynthetic process [GO:0006177]	PF00117;PF00958;PF02540;	NULL	1 out of 5	NULL	KID65239;	K01951
MAN_03757	9959.37	3.97145	0.142088	27.9505	6.4975e-172	1.87433e-170	18604.4	17865.7	19296.8	19132.9	1500.15	1269.57	831.192	1174.3	KID68901.1	296	Oxidoreductase FAD/NAD(P)-binding protein, partial	MAN_03757	A0A0B4FT66	A0A0B4FT66_METAN	unreviewed	Oxidoreductase FAD/NAD(P)-binding protein (Fragment)	Metarhizium anisopliae ARSEF 549	296	GO:0016491	oxidoreductase activity [GO:0016491]	PF00970;PF00175;	NULL	1 out of 5	NULL	KID68901;	K00326
MAN_04589	252.311	11.3759	1.02726	11.074	1.67698e-28	7.1242e-28	501.342	501.671	474.708	540.766	0	0	0	0	KID66308.1	496	P450 monooxygenase, partial	MAN_04589	A0A0B4F712	A0A0B4F712_METAN	unreviewed	p450 monooxygenase (Fragment)	Metarhizium anisopliae ARSEF 549	496	GO:0004497; GO:0005506; GO:0016705; GO:0020037	heme binding [GO:0020037]; iron ion binding [GO:0005506]; monooxygenase activity [GO:0004497]; oxidoreductase activity, acting on paired donors, with incorporation or reduction of molecular oxygen [GO:0016705]	PF00067;	SIGNAL 1 21 {ECO:0000256|SAM:SignalP}.	1 out of 5	NULL	KID66308;	NULL
MAN_09042	4683.11	2.32724	0.0834945	27.873	5.67219e-171	1.62704e-169	7825.99	7670.67	7999.53	7743.73	1501.18	1678.79	1701.58	1343.39	KID61277.1	490	mevalonate kinase, partial	MAN_09042	A0A0B4F083	A0A0B4F083_METAN	unreviewed	Mevalonate kinase (MK) (EC 2.7.1.36) (Fragment)	Metarhizium anisopliae ARSEF 549	490	GO:0004496; GO:0005524; GO:0005737; GO:0016126; GO:0019287	cytoplasm [GO:0005737]; ATP binding [GO:0005524]; mevalonate kinase activity [GO:0004496]; isopentenyl diphosphate biosynthetic process, mevalonate pathway [GO:0019287]; sterol biosynthetic process [GO:0016126]	PF08544;PF00288;	NULL	2 out of 5	NULL	KID61277;	K00869
MAN_01215	396.235	-5.09255	0.18291	-27.8419	1.35068e-170	3.86347e-169	27.8055	28.1837	16.3692	16.5186	729.611	793.747	766.867	790.774	KID71616.1	709	PIF1 helicase-like protein, partial	MAN_01215	A0A0B4G111	A0A0B4G111_METAN	unreviewed	PIF1 helicase-like protein (Fragment)	Metarhizium anisopliae ARSEF 549	709	GO:0004386	helicase activity [GO:0004386]	PF15456;	NULL	1 out of 5	NULL	KID71616;	NULL
MAN_10358	3035.34	3.20532	0.115155	27.8348	1.64704e-170	4.69798e-169	5745.63	5260.96	5104.69	5795.41	473.787	664.857	553.793	683.55	KID59906.1	253	Glutamine amidotransferase type 1, partial	MAN_10358	A0A0B4F244	A0A0B4F244_METAN	unreviewed	Glutamine amidotransferase type 1 (Fragment)	Metarhizium anisopliae ARSEF 549	253	GO:0006541; GO:0016740	transferase activity [GO:0016740]; glutamine metabolic process [GO:0006541]	PF00117;	NULL	1 out of 5	NULL	KID59906;	NULL
MAN_09378	1962.43	-5.48096	0.196952	-27.8289	1.93759e-170	5.51132e-169	69.9351	60.1253	89.4013	124.324	4900.57	3739.95	3147.88	3567.25	KID61094.1	646	laccase, partial	MAN_09378	A0A0B4FXV9	A0A0B4FXV9_METAN	unreviewed	Laccase (Fragment)	Metarhizium anisopliae ARSEF 549	646	GO:0005507; GO:0016491	copper ion binding [GO:0005507]; oxidoreductase activity [GO:0016491]	PF00394;PF07731;PF07732;	SIGNAL 1 19 {ECO:0000256|SAM:SignalP}.	1 out of 5	NULL	KID61094;	NULL
MAN_01680	1401.18	2.74783	0.0990246	27.7489	1.79468e-169	5.09059e-168	2307.86	2409.71	2619.08	2421.28	333.595	335.114	430.169	352.601	KID69166.1	639	C6 zinc finger domain protein, partial	MAN_01680	A0A0B4FU00	A0A0B4FU00_METAN	unreviewed	C6 zinc finger domain protein (Fragment)	Metarhizium anisopliae ARSEF 549	639	NULL	NULL	NULL	NULL	1 out of 5	NULL	KID69166;	NULL
MAN_08103	4110.49	1.76361	0.0635706	27.7425	2.14601e-169	6.07024e-168	6315.22	6362.01	6352.53	6372.69	1978.03	1925.83	1877.47	1700.11	KID62887.1	888	binuclear zinc transcription factor, partial	MAN_08103	A0A0B4F510	A0A0B4F510_METAN	unreviewed	Binuclear zinc transcription factor (Fragment)	Metarhizium anisopliae ARSEF 549	888	GO:0000981; GO:0003677; GO:0005634; GO:0006351; GO:0008270	nucleus [GO:0005634]; DNA binding [GO:0003677]; RNA polymerase II transcription factor activity, sequence-specific DNA binding [GO:0000981]; zinc ion binding [GO:0008270]; transcription, DNA-templated [GO:0006351]	PF04082;PF00172;	NULL	1 out of 5	NULL	KID62887;	NULL
MAN_05355	2689.79	-2.0767	0.0748898	-27.7301	3.026e-169	8.53567e-168	1085.26	968.581	1096.74	975.465	4077.84	4514.37	4535.88	4264.2	KID65696.1	1247	Src-like protein, partial	MAN_05355	A0A0B4FIP4	A0A0B4FIP4_METAN	unreviewed	Src-like protein (Fragment)	Metarhizium anisopliae ARSEF 549	1247	NULL	NULL	PF07653;PF01841;	NULL	1 out of 5	NULL	KID65696;	NULL
MAN_04174	523.704	-3.30925	0.119396	-27.7167	4.39663e-169	1.23676e-167	105.324	97.7036	94.438	86.0705	980.319	1023.6	879.435	922.742	KID67416.1	499	outer membrane autotransporter, partial	MAN_04174	A0A0B4FNY0	A0A0B4FNY0_METAN	unreviewed	Outer membrane autotransporter (Fragment)	Metarhizium anisopliae ARSEF 549	499	NULL	NULL	PF13449;	SIGNAL 1 20 {ECO:0000256|SAM:SignalP}.	1 out of 5	NULL	KID67416;	NULL
MAN_01399	20475.2	1.72374	0.062259	27.6865	1.01469e-168	2.84643e-167	32092.6	32734.5	29784.5	31121.9	9604.67	9298.33	10189.4	8975.85	KID71800.1	447	Succinyl-CoA synthetase, beta subunit, partial	MAN_01399	A0A0B4FCP6	A0A0B4FCP6_METAN	unreviewed	Succinate-CoA ligase subunit beta (EC 6.2.1.-) (Fragment)	Metarhizium anisopliae ARSEF 549	447	GO:0005524; GO:0006099; GO:0016874; GO:0046872	ATP binding [GO:0005524]; ligase activity [GO:0016874]; metal ion binding [GO:0046872]; tricarboxylic acid cycle [GO:0006099]	PF08442;PF00549;	NULL	2 out of 5	NULL	KID71800;	K01900
MAN_04575	2102.04	3.90953	0.141302	27.6679	1.69929e-168	4.75382e-167	4006.52	3847.08	4054.54	3859.26	365.317	228.78	233.176	221.664	KID66294.1	541	hypothetical protein MAN_04575, partial	MAN_04575	A0A0B4GDF3	A0A0B4GDF3_METAN	unreviewed	Uncharacterized protein (Fragment)	Metarhizium anisopliae ARSEF 549	541	NULL	NULL	NULL	NULL	1 out of 5	NULL	KID66294;	NULL
MAN_07697	1301.89	2.02181	0.0730833	27.6645	1.86824e-168	5.21214e-167	2031.49	2057.41	2121.71	2147.41	533.138	472.596	530.676	520.653	KID63496.1	586	Leucine Rich Repeat domain protein, partial	MAN_07697	A0A0B4FC63	A0A0B4FC63_METAN	unreviewed	Leucine Rich Repeat domain protein (Fragment)	Metarhizium anisopliae ARSEF 549	586	NULL	NULL	NULL	NULL	1 out of 5	NULL	KID63496;	NULL
MAN_02762	1142.67	2.78587	0.100809	27.635	4.2258e-168	1.17572e-166	2011.27	2171.09	1866.09	1935.28	264.011	263.15	299.51	330.95	KID67906.1	958	hypothetical protein MAN_02762, partial	MAN_02762	A0A0B4FQC7	A0A0B4FQC7_METAN	unreviewed	Uncharacterized protein (Fragment)	Metarhizium anisopliae ARSEF 549	958	GO:0016021	integral component of membrane [GO:0016021]	PF06738;PF12821;	NULL	1 out of 5	NULL	KID67906;	NULL
MAN_03144	666.047	-6.70673	0.242737	-27.6296	4.91356e-168	1.36335e-166	6.74073	5.63675	13.8509	24.3432	1219.77	1482.23	1264.38	1311.43	KID68288.1	542	Major facilitator superfamily domain, general substrate transporter, partial	MAN_03144	A0A0B4FCR6	A0A0B4FCR6_METAN	unreviewed	Autophagy-related protein (Fragment)	Metarhizium anisopliae ARSEF 549	542	GO:0005774; GO:0006865; GO:0006914; GO:0016021	integral component of membrane [GO:0016021]; vacuolar membrane [GO:0005774]; amino acid transport [GO:0006865]; autophagy [GO:0006914]	PF11700;	NULL	2 out of 5	NULL	KID68288;	NULL
MAN_04105	988.826	2.47713	0.0896634	27.627	5.26866e-168	1.4579e-166	1670.02	1601.78	1767.88	1667.51	326.432	273.891	320.617	282.493	KID67347.1	569	hypothetical protein MAN_04105, partial	MAN_04105	A0A0B4FHJ9	A0A0B4FHJ9_METAN	unreviewed	Uncharacterized protein (Fragment)	Metarhizium anisopliae ARSEF 549	569	NULL	NULL	NULL	NULL	1 out of 5	NULL	KID67347;	NULL
MAN_07856	8497.65	-3.26476	0.118355	-27.5845	1.70543e-167	4.70634e-166	1768.6	1591.44	1366.2	1676.2	13258.9	14007.1	15817.8	18495	KID62640.1	135	hypothetical protein MAN_07856, partial	MAN_07856	A0A0B4EKN6	A0A0B4EKN6_METAN	unreviewed	Uncharacterized protein (Fragment)	Metarhizium anisopliae ARSEF 549	135	NULL	NULL	NULL	SIGNAL 1 18 {ECO:0000256|SAM:SignalP}.	1 out of 5	NULL	KID62640;	NULL
MAN_01085	2589.4	-2.42572	0.0879861	-27.5694	2.59256e-167	7.13515e-166	761.702	850.209	836.091	804.194	4043.05	4441.33	4928.86	4049.75	KID71486.1	1373	hypothetical protein MAN_01085, partial	MAN_01085	A0A0B4G0J9	A0A0B4G0J9_METAN	unreviewed	Uncharacterized protein (Fragment)	Metarhizium anisopliae ARSEF 549	1373	GO:0005543; GO:0005938; GO:0032065	cell cortex [GO:0005938]; phospholipid binding [GO:0005543]; cortical protein anchoring [GO:0032065]	PF12814;	NULL	1 out of 5	NULL	KID71486;	NULL
MAN_04315	700.59	-3.25201	0.117989	-27.562	3.18086e-167	8.73066e-166	129.759	139.979	143.546	120.846	1136.88	1249.16	1245.28	1439.27	KID67557.1	55	hypothetical protein MAN_04315, partial	MAN_04315	A0A0B4FI91	A0A0B4FI91_METAN	unreviewed	Uncharacterized protein (Fragment)	Metarhizium anisopliae ARSEF 549	55	GO:0016021	integral component of membrane [GO:0016021]	NULL	NULL	1 out of 5	NULL	KID67557;	NULL
MAN_00164	5851.38	1.89533	0.0689107	27.5041	1.56763e-166	4.29119e-165	9406.69	9710.24	8870.87	8905.25	2704.58	2468.24	2418.2	2326.96	KID70565.1	563	Zinc/iron permease, partial	MAN_00164	A0A0B4F923	A0A0B4F923_METAN	unreviewed	Zinc/iron permease (Fragment)	Metarhizium anisopliae ARSEF 549	563	GO:0016021; GO:0046873	integral component of membrane [GO:0016021]; metal ion transmembrane transporter activity [GO:0046873]	PF02535;	NULL	1 out of 5	NULL	KID70565;	NULL
MAN_01977	934.777	2.81484	0.102369	27.497	1.90755e-166	5.20766e-165	1686.02	1538.83	1562.63	1759.66	250.708	228.78	200.009	251.563	KID69463.1	279	hypothetical protein MAN_01977, partial	MAN_01977	A0A0B4FG83	A0A0B4FG83_METAN	unreviewed	Uncharacterized protein (Fragment)	Metarhizium anisopliae ARSEF 549	279	NULL	NULL	NULL	NULL	1 out of 5	NULL	KID69463;	NULL
MAN_02283	4794.29	-0.295209	0.0651124	-4.53383	5.79235e-06	1.05159e-05	4516.29	4414.51	4135.12	4153.99	5499.2	5399.41	5353	4882.8	KID69769.1	799	C2H2 finger domain protein, partial	MAN_02283	A0A0B4GNJ1	A0A0B4GNJ1_METAN	unreviewed	C2H2 finger domain protein (Fragment)	Metarhizium anisopliae ARSEF 549	799	GO:0003677; GO:0005634; GO:0006351; GO:0008270	nucleus [GO:0005634]; DNA binding [GO:0003677]; zinc ion binding [GO:0008270]; transcription, DNA-templated [GO:0006351]	PF04082;	NULL	1 out of 5	NULL	KID69769;	NULL
MAN_02680	6500.79	1.41274	0.0514246	27.472	3.79162e-166	1.0296e-164	9775.74	9605.02	9222.18	9202.59	3528.33	3468.21	3530.81	3673.44	KID70166.1	390	mRNA binding post-transcriptional regulator, partial	MAN_02680	A0A0B4FWW6	A0A0B4FWW6_METAN	unreviewed	mRNA binding post-transcriptional regulator (Fragment)	Metarhizium anisopliae ARSEF 549	390	GO:0003723	RNA binding [GO:0003723]	PF00076;	NULL	1 out of 5	NULL	KID70166;	NULL
MAN_04513	732.774	-3.09878	0.112855	-27.458	5.57813e-166	1.51069e-164	165.148	161.587	130.954	152.145	1216.7	1306.08	1258.35	1471.23	KID67755.1	259	hypothetical protein MAN_04513, partial	MAN_04513	A0A0B4F0L9	A0A0B4F0L9_METAN	unreviewed	Uncharacterized protein (Fragment)	Metarhizium anisopliae ARSEF 549	259	NULL	NULL	NULL	NULL	1 out of 5	NULL	KID67755;	NULL
MAN_02072	361.897	-4.05847	0.147876	-27.4451	7.94291e-166	2.14543e-164	33.7036	42.2756	39.0344	48.6863	683.563	680.968	685.457	681.488	KID69558.1	411	O-methyltransferase, partial	MAN_02072	A0A0B4FGJ0	A0A0B4FGJ0_METAN	unreviewed	O-methyltransferase (Fragment)	Metarhizium anisopliae ARSEF 549	411	GO:0008171	O-methyltransferase activity [GO:0008171]	PF00891;	NULL	1 out of 5	NULL	KID69558;	NULL
MAN_05613	2308.53	10.1239	0.370168	27.3495	1.09469e-164	2.949e-163	4683.12	4378.81	4985.07	4404.37	0	10.7408	3.01521	3.09299	KID65954.1	657	glycosyl transferase, group 2 family protein, partial	MAN_05613	A0A0B4GCB8	A0A0B4GCB8_METAN	unreviewed	Glycosyl transferase, group 2 family protein (Fragment)	Metarhizium anisopliae ARSEF 549	657	GO:0016021; GO:0016740	integral component of membrane [GO:0016021]; transferase activity [GO:0016740]	NULL	NULL	1 out of 5	NULL	KID65954;	NULL
MAN_00639	5239.1	-3.91164	0.143526	-27.2539	1.49333e-163	4.01228e-162	614.249	579.646	624.55	792.022	12483.2	8180.21	10010.5	8628.41	KID71040.1	1239	DUF221 domain-containing protein, partial	MAN_00639	A0A0B4FAE2	A0A0B4FAE2_METAN	unreviewed	DUF221 domain-containing protein (Fragment)	Metarhizium anisopliae ARSEF 549	1239	GO:0016021	integral component of membrane [GO:0016021]	PF14703;PF12621;PF02714;PF13967;	NULL	1 out of 5	NULL	KID71040;	K21989
MAN_00809	535.36	3.62605	0.133081	27.247	1.80306e-163	4.83174e-162	935.276	954.489	1053.93	1018.94	82.8871	69.8154	99.5018	68.0457	KID71210.1	460	Major Facilitator Superfamily protein, partial	MAN_00809	A0A0B4FAT3	A0A0B4FAT3_METAN	unreviewed	Major Facilitator Superfamily protein (Fragment)	Metarhizium anisopliae ARSEF 549	460	GO:0016021; GO:0055085	integral component of membrane [GO:0016021]; transmembrane transport [GO:0055085]	PF07690;	NULL	1 out of 5	NULL	KID71210;	NULL
MAN_10708	1663.04	-1.78505	0.0655363	-27.2376	2.33389e-163	6.23779e-162	760.017	742.172	734.098	754.638	2451.82	2555.24	2606.14	2700.18	KID59403.1	1856	reverse transcriptase, partial	MAN_10708	A0A0B4EM88	A0A0B4EM88_METAN	unreviewed	Reverse transcriptase (Fragment)	Metarhizium anisopliae ARSEF 549	1856	GO:0003676; GO:0003964; GO:0004523	nucleic acid binding [GO:0003676]; RNA-directed DNA polymerase activity [GO:0003964]; RNA-DNA hybrid ribonuclease activity [GO:0004523]	PF14529;PF00078;	NULL	1 out of 5	NULL	KID59403;	NULL
MAN_00962	779.433	-2.76586	0.101622	-27.2173	4.05477e-163	1.08088e-161	208.12	174.739	203.986	212.133	1313.91	1443.57	1260.36	1418.65	KID71363.1	513	glycerol kinase, partial	MAN_00962	A0A0B4FLP8	A0A0B4FLP8_METAN	unreviewed	Glycerol kinase (Fragment)	Metarhizium anisopliae ARSEF 549	513	GO:0004370; GO:0005975; GO:0006072	glycerol kinase activity [GO:0004370]; carbohydrate metabolic process [GO:0005975]; glycerol-3-phosphate metabolic process [GO:0006072]	PF02782;PF00370;	NULL	1 out of 5	NULL	KID71363;	K00864
MAN_04470	4357.46	2.11938	0.107242	19.7625	6.25681e-87	7.45183e-86	6786.23	7138	7324.61	7089.08	1263.77	1755.05	1771.94	1731.04	KID67712.1	1527	ABC transporter ABCl1, partial	MAN_04470	A0A0B4FIM3	A0A0B4FIM3_METAN	unreviewed	ABC transporter ABCl1 (Fragment)	Metarhizium anisopliae ARSEF 549	1527	GO:0005524; GO:0016021; GO:0042626	integral component of membrane [GO:0016021]; ATP binding [GO:0005524]; ATPase activity, coupled to transmembrane movement of substances [GO:0042626]	PF01061;PF00005;PF14510;PF06422;	NULL	1 out of 5	NULL	KID67712;	NULL
MAN_01308	17477.3	2.9403	0.108579	27.0797	1.70551e-161	4.52272e-160	30859.1	29406	30978.2	32459	4380.74	3630.4	3348.89	4755.98	KID71709.1	199	hypothetical protein MAN_01308, partial	MAN_01308	A0A0B4GUP0	A0A0B4GUP0_METAN	unreviewed	Uncharacterized protein (Fragment)	Metarhizium anisopliae ARSEF 549	199	NULL	NULL	NULL	NULL	1 out of 5	NULL	KID71709;	NULL
MAN_10676	1196.35	3.52886	0.131221	26.8925	2.68573e-159	7.10359e-158	2104.79	2075.26	2364.73	2263.91	193.403	137.483	230.161	201.044	KID59506.1	364	hypothetical protein MAN_10676, partial	MAN_10676	A0A0B4F0Z3	A0A0B4F0Z3_METAN	unreviewed	Uncharacterized protein (Fragment)	Metarhizium anisopliae ARSEF 549	364	GO:0016021	integral component of membrane [GO:0016021]	NULL	NULL	1 out of 5	NULL	KID59506;	NULL
MAN_04629	2651.35	-3.96565	0.147622	-26.8635	5.85995e-159	1.5459e-157	317.657	261.169	331.163	366.017	4066.58	4973	4530.85	6364.34	KID66348.1	202	hypothetical protein MAN_04629, partial	MAN_04629	A0A0B4F758	A0A0B4F758_METAN	unreviewed	Uncharacterized protein (Fragment)	Metarhizium anisopliae ARSEF 549	202	GO:0016021	integral component of membrane [GO:0016021]	NULL	NULL	1 out of 5	NULL	KID66348;	NULL
MAN_04005	8725.33	-1.97325	0.0734953	-26.8486	8.75185e-159	2.30284e-157	3302.11	3464.72	3594.94	3807.97	12723.7	13786.9	14797.6	14324.7	KID67247.1	1955	chromosome segregation ATPase family protein, partial	MAN_04005	A0A0B4FHA8	A0A0B4FHA8_METAN	unreviewed	Chromosome segregation ATPase family protein (Fragment)	Metarhizium anisopliae ARSEF 549	1955	NULL	NULL	NULL	NULL	1 out of 5	NULL	KID67247;	NULL
MAN_00481	2413.08	2.01783	0.0751748	26.8418	1.05105e-158	2.75845e-157	3800.93	3624.43	4006.69	4049.66	872.873	1004.27	946.775	999.035	KID70882.1	365	C4-dicarboxylate transporter/malic acid transport protein, partial	MAN_00481	A0A0B4FT47	A0A0B4FT47_METAN	unreviewed	C4-dicarboxylate transporter/malic acid transport protein (Fragment)	Metarhizium anisopliae ARSEF 549	365	GO:0016021; GO:0055085	integral component of membrane [GO:0016021]; transmembrane transport [GO:0055085]	PF03595;	NULL	1 out of 5	NULL	KID70882;	NULL
MAN_07049	2711.26	-2.20287	0.0820747	-26.8398	1.11043e-158	2.90681e-157	900.73	999.583	878.903	1087.62	4363.34	4605.67	4314.76	4539.48	KID63878.1	637	hypothetical protein MAN_07049, partial	MAN_07049	A0A0B4F0H0	A0A0B4F0H0_METAN	unreviewed	Uncharacterized protein (Fragment)	Metarhizium anisopliae ARSEF 549	637	NULL	NULL	NULL	NULL	1 out of 5	NULL	KID63878;	NULL
MAN_05541	2663.08	-2.48201	0.0926187	-26.7982	3.39263e-158	8.85823e-157	744.008	759.082	881.421	852.88	4519.9	5048.19	4091.63	4407.51	KID65882.1	761	hypothetical protein MAN_05541, partial	MAN_05541	A0A0B4FDD9	A0A0B4FDD9_METAN	unreviewed	Uncharacterized protein (Fragment)	Metarhizium anisopliae ARSEF 549	761	NULL	NULL	PF10373;	NULL	1 out of 5	NULL	KID65882;	NULL
MAN_03811	19896.6	1.83188	0.0683598	26.7977	3.43763e-158	8.95278e-157	31797.7	30344.5	31208.6	30915.8	8000.14	8766.66	9645.64	8493.35	KID67053.1	324	Mitochondrial substrate/solute carrier, partial	MAN_03811	A0A0B4F948	A0A0B4F948_METAN	unreviewed	Mitochondrial substrate/solute carrier (Fragment)	Metarhizium anisopliae ARSEF 549	324	GO:0006810; GO:0016021	integral component of membrane [GO:0016021]; transport [GO:0006810]	PF00153;	NULL	1 out of 5	NULL	KID67053;	K15102
MAN_03921	568.459	-3.96604	0.148096	-26.7802	5.49792e-158	1.4282e-156	63.1943	74.2172	59.1811	75.6377	877.989	1092.34	1126.68	1178.43	KID67163.1	349	hypothetical protein MAN_03921, partial	MAN_03921	A0A0B4F9D3	A0A0B4F9D3_METAN	unreviewed	Uncharacterized protein (Fragment)	Metarhizium anisopliae ARSEF 549	349	GO:0016021	integral component of membrane [GO:0016021]	NULL	SIGNAL 1 20 {ECO:0000256|SAM:SignalP}.	1 out of 5	NULL	KID67163;	NULL
MAN_06443	736.281	-5.57965	0.208652	-26.7414	1.55532e-157	4.02998e-156	26.1203	25.3654	27.7018	40.8617	1823.52	1553.12	1215.13	1178.43	KID64269.1	374	Triacylglycerol lipase, partial	MAN_06443	A0A0B4G794	A0A0B4G794_METAN	unreviewed	Triacylglycerol lipase (Fragment)	Metarhizium anisopliae ARSEF 549	374	GO:0006629; GO:0016787	hydrolase activity [GO:0016787]; lipid metabolic process [GO:0006629]	PF01764;	SIGNAL 1 25 {ECO:0000256|SAM:SignalP}.	1 out of 5	NULL	KID64269;	NULL
MAN_04319	1866.97	1.87399	0.0702566	26.6735	9.56541e-157	2.4722e-155	3115.9	3008.14	2846.99	2762.95	827.848	783.006	796.014	794.898	KID67561.1	473	Heme A synthase/Protoheme IX farnesyltransferase, partial	MAN_04319	A0A0B4FPF7	A0A0B4FPF7_METAN	unreviewed	Heme A synthase/Protoheme IX farnesyltransferase (Fragment)	Metarhizium anisopliae ARSEF 549	473	GO:0006784; GO:0016021; GO:0016627; GO:0016740	integral component of membrane [GO:0016021]; oxidoreductase activity, acting on the CH-CH group of donors [GO:0016627]; transferase activity [GO:0016740]; heme a biosynthetic process [GO:0006784]	PF02628;	NULL	1 out of 5	NULL	KID67561;	K02259
MAN_06283	1426.13	-4.37979	0.164414	-26.6388	2.41036e-156	6.21386e-155	100.268	120.251	112.066	188.66	2492.75	2990.25	2585.04	2819.77	KID65272.1	545	Major facilitator superfamily domain, general substrate transporter, partial	MAN_06283	A0A0B4FBZ5	A0A0B4FBZ5_METAN	unreviewed	Major facilitator superfamily domain, general substrate transporter (Fragment)	Metarhizium anisopliae ARSEF 549	545	GO:0016021; GO:0055085	integral component of membrane [GO:0016021]; transmembrane transport [GO:0055085]	PF07690;	NULL	1 out of 5	NULL	KID65272;	NULL
MAN_09581	3599.75	-3.13646	0.117885	-26.6062	5.75064e-156	1.47876e-154	725.471	698.017	712.692	803.324	5250.54	6500.35	6295.75	7811.86	KID60853.1	721	hypothetical protein MAN_09581, partial	MAN_09581	A0A0B4ERP2	A0A0B4ERP2_METAN	unreviewed	Uncharacterized protein (Fragment)	Metarhizium anisopliae ARSEF 549	721	NULL	NULL	NULL	NULL	1 out of 5	NULL	KID60853;	NULL
MAN_02486	1154.93	2.91674	0.109662	26.5975	7.25647e-156	1.86128e-154	2059.29	1849.79	2222.44	2027.44	242.522	309.336	291.47	237.129	KID69972.1	458	Major facilitator superfamily domain, general substrate transporter, partial	MAN_02486	A0A0B4FQD0	A0A0B4FQD0_METAN	unreviewed	Major facilitator superfamily domain, general substrate transporter (Fragment)	Metarhizium anisopliae ARSEF 549	458	GO:0016021; GO:0055085	integral component of membrane [GO:0016021]; transmembrane transport [GO:0055085]	PF07690;	NULL	1 out of 5	NULL	KID69972;	NULL
MAN_06013	854.839	-3.29968	0.124216	-26.564	1.771e-155	4.53117e-154	147.453	157.829	139.768	183.443	1358.94	1537.01	1533.73	1780.53	KID65002.1	365	4-hydroxyphenylpyruvate dioxygenase, partial	MAN_06013	A0A0B4FB86	A0A0B4FB86_METAN	unreviewed	4-hydroxyphenylpyruvate dioxygenase (Fragment)	Metarhizium anisopliae ARSEF 549	365	GO:0051213	dioxygenase activity [GO:0051213]	PF01261;	NULL	1 out of 5	NULL	KID65002;	K00457
MAN_01058	2736.13	-3.63661	0.136944	-26.5555	2.21746e-155	5.65926e-154	383.379	448.121	386.566	410.356	3883.41	5517.56	4710.76	6148.86	KID71459.1	1290	hypothetical protein MAN_01058, partial	MAN_01058	A0A0B4GTV3	A0A0B4GTV3_METAN	unreviewed	Uncharacterized protein (Fragment)	Metarhizium anisopliae ARSEF 549	1290	GO:0016021	integral component of membrane [GO:0016021]	NULL	SIGNAL 1 17 {ECO:0000256|SAM:SignalP}.	1 out of 5	NULL	KID71459;	NULL
MAN_07467	931.58	2.41173	0.0909802	26.5083	7.76809e-155	1.97756e-153	1699.51	1572.65	1473.23	1527.53	319.269	295.373	276.394	288.679	KID63266.1	613	NAD(P)-binding domain protein, partial	MAN_07467	A0A0B4FBR9	A0A0B4FBR9_METAN	unreviewed	NAD(P)-binding domain protein (Fragment)	Metarhizium anisopliae ARSEF 549	613	GO:0003857; GO:0006631	3-hydroxyacyl-CoA dehydrogenase activity [GO:0003857]; fatty acid metabolic process [GO:0006631]	PF00725;PF02737;	NULL	1 out of 5	NULL	KID63266;	NULL
MAN_05792	2187.4	2.48572	0.0937831	26.505	8.48225e-155	2.15398e-153	4033.48	3589.67	3579.83	3645.39	584.303	618.671	747.771	700.046	KID64781.1	385	hypothetical protein MAN_05792, partial	MAN_05792	A0A0B4FG29	A0A0B4FG29_METAN	unreviewed	Uncharacterized protein (Fragment)	Metarhizium anisopliae ARSEF 549	385	GO:0016021	integral component of membrane [GO:0016021]	PF14610;	SIGNAL 1 18 {ECO:0000256|SAM:SignalP}.	1 out of 5	NULL	KID64781;	NULL
MAN_06578	1851.92	-4.7692	0.179938	-26.5046	8.5745e-155	2.17199e-153	149.981	107.098	104.511	159.969	4777.78	2976.28	3471.51	3068.24	KID64404.1	532	Cytochrome P450, partial	MAN_06578	A0A0B4G7N4	A0A0B4G7N4_METAN	unreviewed	Cytochrome P450 (Fragment)	Metarhizium anisopliae ARSEF 549	532	GO:0004497; GO:0005506; GO:0016021; GO:0016705; GO:0020037	integral component of membrane [GO:0016021]; heme binding [GO:0020037]; iron ion binding [GO:0005506]; monooxygenase activity [GO:0004497]; oxidoreductase activity, acting on paired donors, with incorporation or reduction of molecular oxygen [GO:0016705]	PF00067;	NULL	1 out of 5	NULL	KID64404;	NULL
MAN_08289	3907.62	1.82571	0.0689672	26.4722	2.02572e-154	5.1186e-153	6304.27	6114.93	5940.78	6022.33	1816.35	1721.75	1794.05	1546.49	KID62285.1	688	acetoacetyl-CoA synthase, partial	MAN_08289	A0A0B4EJG7	A0A0B4EJG7_METAN	unreviewed	Acetoacetyl-CoA synthase (Fragment)	Metarhizium anisopliae ARSEF 549	688	GO:0006629; GO:0030729	acetoacetate-CoA ligase activity [GO:0030729]; lipid metabolic process [GO:0006629]	PF00501;PF13193;	NULL	1 out of 5	NULL	KID62285;	K01907
MAN_00149	2110.79	-2.22125	0.0839148	-26.4703	2.12947e-154	5.36743e-153	710.304	698.957	752.985	819.843	3421.91	3282.4	3817.25	3382.7	KID70550.1	1036	kinesin, partial	MAN_00149	A0A0B4F913	A0A0B4F913_METAN	unreviewed	Kinesin (Fragment)	Metarhizium anisopliae ARSEF 549	1036	GO:0003777; GO:0005524; GO:0007018; GO:0008017	ATP binding [GO:0005524]; microtubule binding [GO:0008017]; microtubule motor activity [GO:0003777]; microtubule-based movement [GO:0007018]	PF00225;	NULL	1 out of 5	NULL	KID70550;	K10401
MAN_04353	1346.82	-3.07033	0.116107	-26.444	4.2727e-154	1.0743e-152	267.101	246.138	314.793	319.939	2203.16	2423.13	2239.29	2761.01	KID67595.1	260	DSBA-like thioredoxin domain protein, partial	MAN_04353	A0A0B4F091	A0A0B4F091_METAN	unreviewed	DSBA-like thioredoxin domain protein (Fragment)	Metarhizium anisopliae ARSEF 549	260	GO:0004519; GO:0006289; GO:0009411; GO:0015035	endonuclease activity [GO:0004519]; protein disulfide oxidoreductase activity [GO:0015035]; nucleotide-excision repair [GO:0006289]; response to UV [GO:0009411]	PF01323;	NULL	1 out of 5	NULL	KID67595;	NULL
MAN_03297	730.474	2.32284	0.0878989	26.4263	6.83906e-154	1.71532e-152	1172.04	1267.33	1245.32	1185.86	231.265	254.558	249.257	238.16	KID68441.1	258	FMN-binding split barrel, partial	MAN_03297	A0A0B4FRT9	A0A0B4FRT9_METAN	unreviewed	FMN-binding split barrel (Fragment)	Metarhizium anisopliae ARSEF 549	258	GO:0048037	cofactor binding [GO:0048037]	PF04299;	NULL	1 out of 5	NULL	KID68441;	K07734
MAN_03466	10788.6	-1.94263	0.0735206	-26.423	7.46355e-154	1.86736e-152	4449.72	4482.15	4355.48	4528.7	15226.7	18048.9	16733.4	18483.7	KID68610.1	487	hypothetical protein MAN_03466, partial	MAN_03466	A0A0B4F3C1	A0A0B4F3C1_METAN	unreviewed	Uncharacterized protein (Fragment)	Metarhizium anisopliae ARSEF 549	487	GO:0016021	integral component of membrane [GO:0016021]	NULL	NULL	1 out of 5	NULL	KID68610;	NULL
MAN_07451	3755.29	1.98884	0.0753601	26.3911	1.73199e-153	4.32276e-152	6175.35	6241.76	5498.81	6079.71	1393.73	1469.34	1561.88	1621.76	KID63250.1	281	Basic-leucine zipper (bZIP) transcription factor, partial	MAN_07451	A0A0B4EMF0	A0A0B4EMF0_METAN	unreviewed	Basic-leucine zipper (BZIP) transcription factor (Fragment)	Metarhizium anisopliae ARSEF 549	281	GO:0003700	transcription factor activity, sequence-specific DNA binding [GO:0003700]	PF07716;	NULL	1 out of 5	NULL	KID63250;	NULL
MAN_03345	2110.88	-2.22097	0.0843506	-26.3302	8.64364e-153	2.15203e-151	742.323	713.988	747.949	778.112	3103.66	3373.69	3795.14	3632.2	KID68489.1	423	serine/threonine-protein kinase Eg2, partial	MAN_03345	A0A0B4GJL4	A0A0B4GJL4_METAN	unreviewed	Serine/threonine-protein kinase Eg2 (Fragment)	Metarhizium anisopliae ARSEF 549	423	GO:0004674; GO:0005524; GO:0007049	ATP binding [GO:0005524]; protein serine/threonine kinase activity [GO:0004674]; cell cycle [GO:0007049]	PF00069;	NULL	1 out of 5	NULL	KID68489;	K08850
MAN_08618	1420.33	-2.35671	0.0895082	-26.3296	8.79657e-153	2.18477e-151	455.842	514.823	453.302	432.091	2193.95	2357.61	2597.1	2357.89	KID61939.1	579	hypothetical protein MAN_08618, partial	MAN_08618	A0A0B4G0E6	A0A0B4G0E6_METAN	unreviewed	Uncharacterized protein (Fragment)	Metarhizium anisopliae ARSEF 549	579	GO:0016021	integral component of membrane [GO:0016021]	NULL	NULL	1 out of 5	NULL	KID61939;	NULL
MAN_07994	5185.3	-4.01445	0.152509	-26.3228	1.05265e-152	2.60807e-151	584.758	524.218	601.885	705.952	7727.94	10476.6	8277.75	12583.3	KID62778.1	624	sialidase, partial	MAN_07994	A0A0B4EXF9	A0A0B4EXF9_METAN	unreviewed	Sialidase (Fragment)	Metarhizium anisopliae ARSEF 549	624	NULL	NULL	NULL	NULL	1 out of 5	NULL	KID62778;	NULL
MAN_10139	1801.5	2.73909	0.104121	26.3067	1.60673e-152	3.97121e-151	3214.49	3214.82	3195.78	2909.01	530.068	511.263	383.936	452.607	KID60109.1	205	Dimeric alpha-beta barrel, partial	MAN_10139	A0A0B4FV35	A0A0B4FV35_METAN	unreviewed	Dimeric alpha-beta barrel (Fragment)	Metarhizium anisopliae ARSEF 549	205	NULL	NULL	PF03992;	NULL	1 out of 5	NULL	KID60109;	NULL
MAN_08944	1141.71	2.01912	0.0769833	26.2281	1.27149e-151	3.13502e-150	1841.9	1831.94	1755.29	1896.16	476.857	472.596	434.19	424.77	KID61705.1	302	Anamorsin, partial	MAN_08944	A0A0B4EHV0	A0A0B4EHV0_METAN	unreviewed	Anamorsin (Fragment)	Metarhizium anisopliae ARSEF 549	302	GO:0005758; GO:0006915; GO:0016226; GO:0046872; GO:0051537	mitochondrial intermembrane space [GO:0005758]; 2 iron, 2 sulfur cluster binding [GO:0051537]; metal ion binding [GO:0046872]; apoptotic process [GO:0006915]; iron-sulfur cluster assembly [GO:0016226]	PF05093;PF16803;	NULL	2 out of 5	NULL	KID61705;	NULL
MAN_09088	619.988	-5.25406	0.200474	-26.2082	2.14421e-151	5.27404e-150	32.8611	32.881	30.2202	30.429	1346.66	1402.75	861.344	1222.76	KID61323.1	560	hypothetical protein MAN_09088, partial	MAN_09088	A0A0B4ET72	A0A0B4ET72_METAN	unreviewed	Uncharacterized protein (Fragment)	Metarhizium anisopliae ARSEF 549	560	GO:0016021	integral component of membrane [GO:0016021]	NULL	NULL	1 out of 5	NULL	KID61323;	NULL
MAN_06481	3008.25	1.90352	0.072638	26.2056	2.29489e-151	5.63104e-150	4808.67	4655.01	4895.66	4632.16	1257.63	1135.31	1361.87	1319.67	KID64307.1	451	(R)-benzylsuccinyl-CoA dehydrogenase, partial	MAN_06481	A0A0B4F983	A0A0B4F983_METAN	unreviewed	(R)-benzylsuccinyl-CoA dehydrogenase (Fragment)	Metarhizium anisopliae ARSEF 549	451	GO:0016627; GO:0050660	flavin adenine dinucleotide binding [GO:0050660]; oxidoreductase activity, acting on the CH-CH group of donors [GO:0016627]	PF00441;PF02770;PF02771;	NULL	1 out of 5	NULL	KID64307;	K00249
MAN_05047	1474.04	-2.53631	0.0967884	-26.2047	2.34899e-151	5.74994e-150	412.87	446.243	411.75	461.651	2263.53	2686.28	2343.82	2766.16	KID66766.1	606	cell division control protein Cdc6, partial	MAN_05047	A0A0B4FLW4	A0A0B4FLW4_METAN	unreviewed	Cell division control protein Cdc6 (Fragment)	Metarhizium anisopliae ARSEF 549	606	GO:0006270; GO:0051301	cell division [GO:0051301]; DNA replication initiation [GO:0006270]	PF13401;PF09079;	NULL	1 out of 5	NULL	KID66766;	K02213
MAN_05045	3378.79	-3.09423	0.118297	-26.1564	8.33076e-151	2.03434e-149	683.341	706.472	677.435	765.071	5355.94	6273.72	5175.1	7393.27	KID66764.1	732	hypothetical protein MAN_05045, partial	MAN_05045	A0A0B4GEW1	A0A0B4GEW1_METAN	unreviewed	Uncharacterized protein (Fragment)	Metarhizium anisopliae ARSEF 549	732	NULL	NULL	NULL	NULL	1 out of 5	NULL	KID66764;	NULL
MAN_04855	2678.03	-1.60955	0.0615362	-26.1561	8.40029e-151	2.04641e-149	1265.57	1299.27	1397.68	1329.31	4047.14	4194.29	3886.6	4004.39	KID66574.1	1186	Serine/threonine-protein kinase domain protein, partial	MAN_04855	A0A0B4GEF0	A0A0B4GEF0_METAN	unreviewed	Serine/threonine-protein kinase domain protein (Fragment)	Metarhizium anisopliae ARSEF 549	1186	GO:0004674; GO:0005524	ATP binding [GO:0005524]; protein serine/threonine kinase activity [GO:0004674]	PF00498;PF00069;	NULL	1 out of 5	NULL	KID66574;	NULL
MAN_05416	1918.91	-2.12298	0.081192	-26.1476	1.04882e-150	2.54897e-149	734.74	714.927	706.396	709.429	2753.69	3208.28	3329.79	3194.03	KID65757.1	628	hypothetical protein MAN_05416, partial	MAN_05416	A0A0B4FD49	A0A0B4FD49_METAN	unreviewed	Uncharacterized protein (Fragment)	Metarhizium anisopliae ARSEF 549	628	NULL	NULL	NULL	SIGNAL 1 16 {ECO:0000256|SAM:SignalP}.	1 out of 5	NULL	KID65757;	NULL
MAN_06522	1738.48	2.60977	0.0998848	26.1278	1.76318e-150	4.27488e-149	3195.11	3000.63	2835.66	2918.57	438.995	447.892	489.468	581.482	KID64348.1	509	Taurine catabolism dioxygenase TauD/TfdA, partial	MAN_06522	A0A0B4F1M5	A0A0B4F1M5_METAN	unreviewed	Taurine catabolism dioxygenase TauD/TfdA (Fragment)	Metarhizium anisopliae ARSEF 549	509	GO:0051213	dioxygenase activity [GO:0051213]	PF06155;PF02668;	NULL	1 out of 5	NULL	KID64348;	NULL
MAN_06309	668.301	4.22812	0.161839	26.1255	1.87124e-150	4.5261e-149	1233.55	1404.49	1197.47	1240.63	64.4677	52.63	97.4917	55.6738	KID65298.1	916	subtilisin-like serine protease PR1C, partial	MAN_06309	A0A0B4F481	A0A0B4F481_METAN	unreviewed	Subtilisin-like serine protease PR1C (Fragment)	Metarhizium anisopliae ARSEF 549	916	GO:0004252; GO:0005618; GO:0016020	cell wall [GO:0005618]; membrane [GO:0016020]; serine-type endopeptidase activity [GO:0004252]	PF06280;PF00082;	SIGNAL 1 21 {ECO:0000256|SAM:SignalP}.	1 out of 5	NULL	KID65298;	NULL
MAN_05929	2626.22	1.75251	0.0671387	26.1029	3.3809e-150	8.15823e-149	4100.05	4117.64	4014.24	3969.67	1134.84	1201.9	1314.63	1156.78	KID64918.1	366	Fatty acid hydroxylase, partial	MAN_05929	A0A0B4F337	A0A0B4F337_METAN	unreviewed	Fatty acid hydroxylase (Fragment)	Metarhizium anisopliae ARSEF 549	366	GO:0005506; GO:0008610; GO:0016021; GO:0016491	integral component of membrane [GO:0016021]; iron ion binding [GO:0005506]; oxidoreductase activity [GO:0016491]; lipid biosynthetic process [GO:0008610]	PF04116;	NULL	1 out of 5	NULL	KID64918;	K04713
MAN_05522	8325.82	2.24939	0.0862249	26.0875	5.06039e-150	1.2182e-148	13875.8	13911.5	13640.6	13603.5	2967.56	3344.69	2568.96	2693.99	KID65863.1	1074	Glycine cleavage system P protein, homodimeric, partial	MAN_05522	A0A0B4F5W3	A0A0B4F5W3_METAN	unreviewed	Glycine cleavage system P protein (EC 1.4.4.2) (Fragment)	Metarhizium anisopliae ARSEF 549	1074	GO:0004375; GO:0005739; GO:0006546	mitochondrion [GO:0005739]; glycine dehydrogenase (decarboxylating) activity [GO:0004375]; glycine catabolic process [GO:0006546]	PF02347;	NULL	2 out of 5	NULL	KID65863;	K00281
MAN_04286	662.635	2.44143	0.093824	26.0214	2.83773e-149	6.81523e-148	1096.21	1144.26	1148.37	1088.49	188.287	206.224	226.14	203.106	KID67528.1	399	short-chain dehydrogenase, partial	MAN_04286	A0A0B4FAF8	A0A0B4FAF8_METAN	unreviewed	Short-chain dehydrogenase (Fragment)	Metarhizium anisopliae ARSEF 549	399	NULL	NULL	PF00106;	NULL	1 out of 5	NULL	KID67528;	NULL
MAN_03879	538.512	-3.72453	0.143236	-26.0027	4.61465e-149	1.10567e-147	81.7313	60.1253	79.3279	81.7235	983.389	1118.12	861.344	1042.34	KID67121.1	142	hypothetical protein MAN_03879, partial	MAN_03879	A0A0B4FN37	A0A0B4FN37_METAN	unreviewed	Uncharacterized protein (Fragment)	Metarhizium anisopliae ARSEF 549	142	NULL	NULL	NULL	NULL	1 out of 5	NULL	KID67121;	NULL
MAN_00619	1901.56	-2.51872	0.0968784	-25.9987	5.11681e-149	1.22311e-147	519.036	582.464	599.366	561.632	3703.31	3286.69	3005.16	2954.83	KID71020.1	604	WD40 repeat-like-containing domain protein, partial	MAN_00619	A0A0B4FA97	A0A0B4FA97_METAN	unreviewed	WD40 repeat-like-containing domain protein (Fragment)	Metarhizium anisopliae ARSEF 549	604	NULL	NULL	PF00400;	NULL	1 out of 5	NULL	KID71020;	NULL
MAN_07835	435.283	3.10733	0.119523	25.9977	5.25455e-149	1.25309e-147	781.925	806.055	742.912	789.414	98.2366	83.7784	98.4967	81.4487	KID62619.1	1647	Amino acid adenylation, partial	MAN_07835	A0A0B4G2F7	A0A0B4G2F7_METAN	unreviewed	Amino acid adenylation (Fragment)	Metarhizium anisopliae ARSEF 549	1647	GO:0003824; GO:0008152	catalytic activity [GO:0003824]; metabolic process [GO:0008152]	PF00501;PF00668;PF00550;	NULL	1 out of 5	NULL	KID62619;	NULL
MAN_03621	929.465	2.60682	0.100287	25.9935	5.85847e-149	1.39385e-147	1586.6	1541.65	1631.89	1626.65	236.382	280.335	231.166	301.051	KID68765.1	987	hypothetical protein MAN_03621, partial	MAN_03621	A0A0B4F3P5	A0A0B4F3P5_METAN	unreviewed	Uncharacterized protein (Fragment)	Metarhizium anisopliae ARSEF 549	987	GO:0016021	integral component of membrane [GO:0016021]	PF10334;PF10337;	NULL	1 out of 5	NULL	KID68765;	NULL
MAN_09938	8093.54	-1.81664	0.0699057	-25.9871	6.93556e-149	1.64626e-147	3677.07	3644.16	3603.75	3392.39	12586.6	11766.6	13877	12200.8	KID60405.1	587	WD-repeat containing protein slp1, partial	MAN_09938	A0A0B4EE26	A0A0B4EE26_METAN	unreviewed	WD-repeat containing protein slp1 (Fragment)	Metarhizium anisopliae ARSEF 549	587	GO:0010997; GO:0097027; GO:1904668	anaphase-promoting complex binding [GO:0010997]; ubiquitin-protein transferase activator activity [GO:0097027]; positive regulation of ubiquitin protein ligase activity [GO:1904668]	PF12894;PF00400;	NULL	1 out of 5	NULL	KID60405;	K03363
MAN_09258	707.36	-4.59112	0.17671	-25.9811	8.10083e-149	1.91839e-147	64.0369	62.0042	41.5527	55.6415	1194.19	1339.38	1165.88	1736.2	KID61493.1	512	arginyl-tRNA synthetase, partial	MAN_09258	A0A0B4ETU1	A0A0B4ETU1_METAN	unreviewed	Arginyl-tRNA synthetase (Fragment)	Metarhizium anisopliae ARSEF 549	512	GO:0004814; GO:0005524; GO:0006420	arginine-tRNA ligase activity [GO:0004814]; ATP binding [GO:0005524]; arginyl-tRNA aminoacylation [GO:0006420]	PF05746;PF00750;	NULL	1 out of 5	NULL	KID61493;	K01887
MAN_03848	4505.15	1.74336	0.0671514	25.9617	1.34241e-148	3.17163e-147	6581.48	6709.61	7198.69	7262.96	1928.92	2129.91	2060.39	2169.22	KID67090.1	1021	transcription factor SPT20, partial	MAN_03848	A0A0B4EZ22	A0A0B4EZ22_METAN	unreviewed	Transcription factor SPT20 (Fragment)	Metarhizium anisopliae ARSEF 549	1021	GO:0000124; GO:0003712	SAGA complex [GO:0000124]; transcription cofactor activity [GO:0003712]	PF12090;	NULL	1 out of 5	NULL	KID67090;	K11361
MAN_03192	4727.05	1.77731	0.0684825	25.9527	1.69407e-148	3.99322e-147	7125.79	7196.25	7660.81	7294.26	2258.42	2106.28	2235.27	1939.3	KID68336.1	498	Zinc finger, MYND-type, partial	MAN_03192	A0A0B4FRH5	A0A0B4FRH5_METAN	unreviewed	Zinc finger, MYND-type (Fragment)	Metarhizium anisopliae ARSEF 549	498	NULL	NULL	PF13824;	NULL	1 out of 5	NULL	KID68336;	K17656
MAN_01731	530.726	-4.41127	0.170228	-25.9139	4.6493e-148	1.09339e-146	51.3981	46.9729	47.8486	44.3393	1248.42	854.97	1032.21	919.649	KID69217.1	220	hypothetical protein MAN_01731, partial	MAN_01731	A0A0B4FN40	A0A0B4FN40_METAN	unreviewed	Uncharacterized protein (Fragment)	Metarhizium anisopliae ARSEF 549	220	NULL	NULL	NULL	NULL	1 out of 5	NULL	KID69217;	NULL
MAN_09420	1554.44	2.95286	0.114005	25.9011	6.47044e-148	1.51817e-146	2846.27	2573.18	2653.08	2940.31	291.64	352.299	346.749	431.987	KID61136.1	360	ubiquitin/metalloprotease fusion protein, partial	MAN_09420	A0A0B4F5J9	A0A0B4F5J9_METAN	unreviewed	Ubiquitin/metalloprotease fusion protein (Fragment)	Metarhizium anisopliae ARSEF 549	360	GO:0008237	metallopeptidase activity [GO:0008237]	PF08325;	NULL	1 out of 5	NULL	KID61136;	NULL
MAN_08366	2483.72	-2.04342	0.0788962	-25.9001	6.65106e-148	1.55696e-146	1034.7	984.552	868.829	985.898	3964.25	4197.51	3696.64	4137.39	KID62362.1	545	glyoxalase family protein, partial	MAN_08366	A0A0B4F3H3	A0A0B4F3H3_METAN	unreviewed	Glyoxalase family protein (Fragment)	Metarhizium anisopliae ARSEF 549	545	NULL	NULL	NULL	NULL	1 out of 5	NULL	KID62362;	NULL
MAN_04070	3147.09	-1.5534	0.0600403	-25.8726	1.35443e-147	3.16333e-146	1550.37	1612.11	1634.41	1603.17	4935.36	4513.29	4533.87	4794.13	KID67312.1	564	hypothetical protein MAN_04070, partial	MAN_04070	A0A0B4FHG7	A0A0B4FHG7_METAN	unreviewed	Uncharacterized protein (Fragment)	Metarhizium anisopliae ARSEF 549	564	NULL	NULL	NULL	NULL	1 out of 5	NULL	KID67312;	NULL
MAN_06379	3703.62	-3.12851	0.120932	-25.8701	1.44492e-147	3.36696e-146	685.869	693.32	824.758	838.1	5447.01	7149.09	6306.81	7684.01	KID65368.1	1079	Dynamin, GTPase domain protein, partial	MAN_06379	A0A0B4F4G6	A0A0B4F4G6_METAN	unreviewed	Dynamin, GTPase domain protein (Fragment)	Metarhizium anisopliae ARSEF 549	1079	NULL	NULL	PF00350;	NULL	1 out of 5	NULL	KID65368;	NULL
MAN_02741	1.13054	3.58022	2.65095	1.35054	0.176843	0.210846	0	4.69729	0	4.34699	0	0	0	0	KID70227.1	368	Alcohol dehydrogenase superfamily, zinc-type, partial	MAN_02741	A0A0B4FR56	A0A0B4FR56_METAN	unreviewed	Alcohol dehydrogenase superfamily, zinc-type (Fragment)	Metarhizium anisopliae ARSEF 549	368	GO:0016491	oxidoreductase activity [GO:0016491]	PF08240;	NULL	1 out of 5	NULL	KID70227;	NULL
MAN_07950	74542.3	11.4508	0.443055	25.8451	2.75879e-147	6.39927e-146	147952	134685	159695	153793	42.9785	102.038	34.1723	34.0229	KID62734.1	256	hypothetical protein MAN_07950, partial	MAN_07950	A0A0B4G2R2	A0A0B4G2R2_METAN	unreviewed	Uncharacterized protein (Fragment)	Metarhizium anisopliae ARSEF 549	256	NULL	NULL	NULL	SIGNAL 1 18 {ECO:0000256|SAM:SignalP}.	1 out of 5	NULL	KID62734;	NULL
MAN_07633	563.872	-4.50677	0.174499	-25.8269	4.42887e-147	1.02498e-145	45.4999	48.8518	49.1077	46.9475	856.5	1175.05	990.998	1298.02	KID63432.1	219	hypothetical protein MAN_07633, partial	MAN_07633	A0A0B4F6L9	A0A0B4F6L9_METAN	unreviewed	Uncharacterized protein (Fragment)	Metarhizium anisopliae ARSEF 549	219	NULL	NULL	PF14478;	NULL	1 out of 5	NULL	KID63432;	NULL
MAN_01230	512.056	2.99549	0.11619	25.781	1.44845e-146	3.34457e-145	915.054	879.333	982.155	864.182	107.446	100.964	124.629	122.689	KID71631.1	258	collagen-like protein Mcl1, partial	MAN_01230	A0A0B4G125	A0A0B4G125_METAN	unreviewed	Collagen-like protein Mcl1 (Fragment)	Metarhizium anisopliae ARSEF 549	258	NULL	NULL	NULL	SIGNAL 1 20 {ECO:0000256|SAM:SignalP}.	1 out of 5	NULL	KID71631;	NULL
MAN_04385	1379.02	2.22789	0.0866704	25.7054	1.01798e-145	2.34527e-144	2468.79	2126.93	2294.21	2201.32	437.971	491.93	494.494	516.529	KID67627.1	272	phytanoyl-CoA dioxygenase, partial	MAN_04385	A0A0B4FIE9	A0A0B4FIE9_METAN	unreviewed	Phytanoyl-CoA dioxygenase (Fragment)	Metarhizium anisopliae ARSEF 549	272	GO:0051213	dioxygenase activity [GO:0051213]	PF10294;	NULL	1 out of 5	NULL	KID67627;	K17878
MAN_06315	671.161	-3.51463	0.136851	-25.6822	1.84725e-145	4.24618e-144	80.8888	106.159	120.881	126.063	1170.65	1151.42	1252.32	1360.91	KID65304.1	388	O-methyl transferase B, partial	MAN_06315	A0A0B4GAF5	A0A0B4GAF5_METAN	unreviewed	O-methyl transferase B (Fragment)	Metarhizium anisopliae ARSEF 549	388	GO:0008171	O-methyltransferase activity [GO:0008171]	PF00891;	NULL	1 out of 5	NULL	KID65304;	NULL
MAN_01172	2215.69	-2.08675	0.0813537	-25.6503	4.19262e-145	9.61563e-144	802.147	882.151	863.793	831.145	3730.94	3650.81	3790.11	3174.44	KID71573.1	1150	C6 zinc finger domain-containing protein, partial	MAN_01172	A0A0B4FMG0	A0A0B4FMG0_METAN	unreviewed	C6 zinc finger domain-containing protein (Fragment)	Metarhizium anisopliae ARSEF 549	1150	GO:0000981; GO:0005634; GO:0008270	nucleus [GO:0005634]; RNA polymerase II transcription factor activity, sequence-specific DNA binding [GO:0000981]; zinc ion binding [GO:0008270]	PF00172;	NULL	1 out of 5	NULL	KID71573;	NULL
MAN_03742	20969.1	3.47811	0.135606	25.6486	4.38416e-145	1.00323e-143	40468	39158.5	36358.6	37952.7	4275.34	3892.47	2620.21	3027	KID68886.1	542	aerobactin siderophore biosynthesis protein iucB, partial	MAN_03742	A0A0B4FT51	A0A0B4FT51_METAN	unreviewed	Aerobactin siderophore biosynthesis protein iucB (Fragment)	Metarhizium anisopliae ARSEF 549	542	NULL	NULL	NULL	NULL	1 out of 5	NULL	KID68886;	NULL
MAN_07652	3369.64	2.29378	0.089489	25.632	6.71634e-145	1.53346e-143	5641.15	5493.95	5418.22	5836.27	988.505	1312.53	1103.57	1162.96	KID63451.1	489	Amino acid transporter, transmembrane, partial	MAN_07652	A0A0B4FC17	A0A0B4FC17_METAN	unreviewed	Amino acid transporter, transmembrane (Fragment)	Metarhizium anisopliae ARSEF 549	489	GO:0016021	integral component of membrane [GO:0016021]	PF01490;	NULL	1 out of 5	NULL	KID63451;	NULL
MAN_05645	1804.94	-2.79157	0.108921	-25.6294	7.17586e-145	1.63472e-143	468.481	434.969	463.376	455.565	2609.41	3409.14	3030.28	3568.28	KID65986.1	914	S8 family Peptidase, partial	MAN_05645	A0A0B4FJI2	A0A0B4FJI2_METAN	unreviewed	S8 family Peptidase (Fragment)	Metarhizium anisopliae ARSEF 549	914	GO:0004252	serine-type endopeptidase activity [GO:0004252]	PF00082;	NULL	1 out of 5	NULL	KID65986;	NULL
MAN_04207	4588.74	-1.92622	0.0753264	-25.5716	3.15813e-144	7.17841e-143	1794.72	1882.67	1949.2	2021.35	7488.49	7598.06	6503.8	7471.63	KID67449.1	778	glycosyl hydrolase, family 92 protein, partial	MAN_04207	A0A0B4GGP6	A0A0B4GGP6_METAN	unreviewed	Glycosyl hydrolase, family 92 protein (Fragment)	Metarhizium anisopliae ARSEF 549	778	GO:0016787; GO:0030246	carbohydrate binding [GO:0030246]; hydrolase activity [GO:0016787]	PF07971;	SIGNAL 1 22 {ECO:0000256|SAM:SignalP}.	1 out of 5	NULL	KID67449;	NULL
MAN_01427	11741.3	3.54081	0.100864	35.1048	5.69401e-270	3.69312e-268	21026.9	20713.2	22928.3	21828.9	1638.3	2104.13	1617.16	2073.33	KID71828.1	353	alcohol dehydrogenase I, partial	MAN_01427	A0A0B4FN46	A0A0B4FN46_METAN	unreviewed	Alcohol dehydrogenase I (Fragment)	Metarhizium anisopliae ARSEF 549	353	GO:0008270; GO:0016491	oxidoreductase activity [GO:0016491]; zinc ion binding [GO:0008270]	PF08240;PF00107;	NULL	1 out of 5	NULL	KID71828;	K13953
MAN_02676	7178.87	1.90277	0.0745356	25.5283	9.55809e-144	2.16289e-142	11128.9	10717.3	11704	11763	3256.13	3119.14	3045.36	2697.09	KID70162.1	393	Isocitrate dehydrogenase	MAN_02676	A0A0B4FQY3	A0A0B4FQY3_METAN	unreviewed	Isocitrate dehydrogenase [NAD] subunit, mitochondrial (Fragment)	Metarhizium anisopliae ARSEF 549	393	GO:0000287; GO:0004449; GO:0005739; GO:0006099; GO:0051287	mitochondrion [GO:0005739]; isocitrate dehydrogenase (NAD+) activity [GO:0004449]; magnesium ion binding [GO:0000287]; NAD binding [GO:0051287]; tricarboxylic acid cycle [GO:0006099]	PF00180;	NULL	1 out of 5	NULL	KID70162;	K00030
MAN_02976	906.283	2.89969	0.113663	25.5112	1.48177e-143	3.34565e-142	1614.4	1539.77	1648.26	1591.87	199.543	170.779	238.201	247.439	KID68120.1	254	class I alpha-mannosidase, partial	MAN_02976	A0A0B4F1T8	A0A0B4F1T8_METAN	unreviewed	Class I alpha-mannosidase (Fragment)	Metarhizium anisopliae ARSEF 549	254	NULL	NULL	PF06041;	NULL	1 out of 5	NULL	KID68120;	NULL
MAN_03018	4998.87	1.79432	0.0704295	25.4768	3.56106e-143	8.02263e-142	8098.14	7675.37	7639.4	7627.24	2124.37	2410.24	2062.4	2353.76	KID68162.1	517	cystathionine beta-synthase, partial	MAN_03018	A0A0B4FJX5	A0A0B4FJX5_METAN	unreviewed	Cystathionine beta-synthase (EC 4.2.1.22) (Fragment)	Metarhizium anisopliae ARSEF 549	517	GO:0004122; GO:0005737; GO:0006535; GO:0019343	cytoplasm [GO:0005737]; cystathionine beta-synthase activity [GO:0004122]; cysteine biosynthetic process from serine [GO:0006535]; cysteine biosynthetic process via cystathionine [GO:0019343]	PF00571;PF00291;	NULL	2 out of 5	NULL	KID68162;	K01697
MAN_01336	16960.8	2.44337	0.0959518	25.4645	4.87839e-143	1.09661e-141	27663.1	28411.1	30747.7	27792.1	4688.75	5783.93	4667.54	5932.35	KID71737.1	105	hypothetical protein MAN_01336, partial	MAN_01336	A0A0B4FVJ0	A0A0B4FVJ0_METAN	unreviewed	Uncharacterized protein (Fragment)	Metarhizium anisopliae ARSEF 549	105	NULL	NULL	NULL	NULL	1 out of 5	NULL	KID71737;	NULL
MAN_01346	4616.9	2.59094	0.101754	25.4626	5.11404e-143	1.14705e-141	7618.71	7782.47	8372.24	7903.7	1469.46	1487.6	1165.88	1135.13	KID71747.1	275	hypothetical protein MAN_01346, partial	MAN_01346	A0A0B4FVJ9	A0A0B4FVJ9_METAN	unreviewed	Uncharacterized protein (Fragment)	Metarhizium anisopliae ARSEF 549	275	GO:0016021	integral component of membrane [GO:0016021]	NULL	NULL	1 out of 5	NULL	KID71747;	NULL
MAN_08693	3200.2	1.77063	0.0695451	25.4602	5.44943e-143	1.2196e-141	5057.23	4790.3	5037.95	4913.84	1513.46	1360.86	1362.87	1565.05	KID62014.1	407	alpha/beta hydrolase, partial	MAN_08693	A0A0B4G0L9	A0A0B4G0L9_METAN	unreviewed	Alpha/beta hydrolase (Fragment)	Metarhizium anisopliae ARSEF 549	407	GO:0016021; GO:0016787	integral component of membrane [GO:0016021]; hydrolase activity [GO:0016787]	PF12697;	NULL	1 out of 5	NULL	KID62014;	NULL
MAN_05032	699.125	-2.82248	0.110876	-25.4562	6.02547e-143	1.34556e-141	172.731	174.739	190.135	157.361	1278.1	1154.64	1351.82	1113.48	KID66751.1	492	mucin, partial	MAN_05032	A0A0B4FLV3	A0A0B4FLV3_METAN	unreviewed	Mucin (Fragment)	Metarhizium anisopliae ARSEF 549	492	NULL	NULL	NULL	NULL	1 out of 5	NULL	KID66751;	NULL
MAN_01561	693.081	-5.25575	0.207043	-25.3848	3.7125e-142	8.27229e-141	25.2777	20.6681	40.2935	55.6415	1211.58	1466.12	1313.62	1411.43	KID71962.1	300	hypothetical protein MAN_01561, partial	MAN_01561	A0A0B4FW58	A0A0B4FW58_METAN	unreviewed	Uncharacterized protein (Fragment)	Metarhizium anisopliae ARSEF 549	300	GO:0016021	integral component of membrane [GO:0016021]	NULL	NULL	1 out of 5	NULL	KID71962;	NULL
MAN_03607	5320.46	1.44086	0.0567827	25.375	4.76326e-142	1.05904e-140	7927.1	7661.28	7810.65	7707.22	2995.19	2839.87	2943.85	2678.53	KID68751.1	292	t-SNARE, partial	MAN_03607	A0A0B4FSR2	A0A0B4FSR2_METAN	unreviewed	t-SNARE (Fragment)	Metarhizium anisopliae ARSEF 549	292	GO:0016021; GO:0016192	integral component of membrane [GO:0016021]; vesicle-mediated transport [GO:0016192]	PF05739;PF00804;	NULL	1 out of 5	NULL	KID68751;	K08486
MAN_08076	2313.17	1.36753	0.0539755	25.3362	1.2769e-141	2.83282e-140	3344.24	3299.38	3402.29	3291.54	1320.05	1291.05	1280.46	1276.37	KID62860.1	816	Transcription factor, fungi, partial	MAN_08076	A0A0B4EL98	A0A0B4EL98_METAN	unreviewed	Transcription factor, fungi (Fragment)	Metarhizium anisopliae ARSEF 549	816	GO:0000981; GO:0003677; GO:0005634; GO:0006351; GO:0008270	nucleus [GO:0005634]; DNA binding [GO:0003677]; RNA polymerase II transcription factor activity, sequence-specific DNA binding [GO:0000981]; zinc ion binding [GO:0008270]; transcription, DNA-templated [GO:0006351]	PF04082;	NULL	1 out of 5	NULL	KID62860;	NULL
MAN_03429	5724.55	2.80492	0.110788	25.3179	2.02675e-141	4.4866e-140	9225.53	9931.95	10850.3	10056.3	1160.42	1381.27	1691.53	1499.07	KID68573.1	1325	MDR efflux pump ABC3, partial	MAN_03429	A0A0B4FDP4	A0A0B4FDP4_METAN	unreviewed	MDR efflux pump ABC3 (Fragment)	Metarhizium anisopliae ARSEF 549	1325	GO:0005524; GO:0016021; GO:0042626	integral component of membrane [GO:0016021]; ATP binding [GO:0005524]; ATPase activity, coupled to transmembrane movement of substances [GO:0042626]	PF00664;PF00005;	NULL	1 out of 5	NULL	KID68573;	NULL
MAN_04627	8546.05	2.04572	0.0809343	25.2764	5.81428e-141	1.28431e-139	13250.6	12693	15238.5	13857.3	3042.26	3323.21	3593.12	3370.33	KID66346.1	67	hypothetical protein MAN_04627, partial	MAN_04627	A0A0B4FKJ0	A0A0B4FKJ0_METAN	unreviewed	Uncharacterized protein (Fragment)	Metarhizium anisopliae ARSEF 549	67	GO:0016021	integral component of membrane [GO:0016021]	NULL	NULL	1 out of 5	NULL	KID66346;	NULL
MAN_01915	32.0765	-4.64462	0.686618	-6.7645	1.33775e-11	3.23263e-11	0	6.57621	3.77752	0	92.0968	34.3706	72.3649	47.4258	KID69401.1	225	Heat shock protein DnaJ, partial	MAN_01915	A0A0B4FUM5	A0A0B4FUM5_METAN	unreviewed	Heat shock protein DnaJ (Fragment)	Metarhizium anisopliae ARSEF 549	225	NULL	NULL	PF00226;	NULL	1 out of 5	NULL	KID69401;	NULL
MAN_06453	1288.47	-2.78564	0.110318	-25.251	1.10534e-140	2.43103e-139	315.972	334.447	305.979	347.759	1883.89	2264.17	2295.58	2559.96	KID64279.1	740	WD domain protein, partial	MAN_06453	A0A0B4G7A2	A0A0B4G7A2_METAN	unreviewed	WD domain protein (Fragment)	Metarhizium anisopliae ARSEF 549	740	NULL	NULL	PF00400;	NULL	1 out of 5	NULL	KID64279;	NULL
MAN_07539	3156.43	1.88861	0.0749183	25.2089	3.19837e-140	7.01917e-139	4988.14	4918.06	4875.52	5099.89	1347.68	1286.75	1231.21	1504.22	KID63338.1	396	NADP:D-xylose dehydrogenase, partial	MAN_07539	A0A0B4EYZ9	A0A0B4EYZ9_METAN	unreviewed	NADP:D-xylose dehydrogenase (Fragment)	Metarhizium anisopliae ARSEF 549	396	GO:0016491	oxidoreductase activity [GO:0016491]	PF01408;	NULL	1 out of 5	NULL	KID63338;	NULL
MAN_09734	590.944	4.59109	0.182262	25.1895	5.22724e-140	1.14471e-138	1123.17	1128.29	1070.3	1218.03	36.8387	30.0743	71.3599	49.4878	KID60599.1	394	agmatinase, partial	MAN_09734	A0A0B4FWI3	A0A0B4FWI3_METAN	unreviewed	Agmatinase (Fragment)	Metarhizium anisopliae ARSEF 549	394	GO:0016813; GO:0046872	hydrolase activity, acting on carbon-nitrogen (but not peptide) bonds, in linear amidines [GO:0016813]; metal ion binding [GO:0046872]	PF00491;	SIGNAL 1 22 {ECO:0000256|SAM:SignalP}.	1 out of 5	NULL	KID60599;	K01480
MAN_08172	2781.29	3.6124	0.143445	25.1831	6.13129e-140	1.33981e-138	5292.32	4542.28	5236.9	5496.34	459.461	541.338	352.779	328.888	KID62168.1	462	Major Facilitator Superfamily protein, partial	MAN_08172	A0A0B4EVT9	A0A0B4EVT9_METAN	unreviewed	Major Facilitator Superfamily protein (Fragment)	Metarhizium anisopliae ARSEF 549	462	GO:0016021; GO:0055085	integral component of membrane [GO:0016021]; transmembrane transport [GO:0055085]	PF07690;	NULL	1 out of 5	NULL	KID62168;	NULL
MAN_07414	7070.37	1.27647	0.0506883	25.1826	6.21041e-140	1.35419e-138	10031	10021.2	10123.8	9859.85	3927.42	4307.07	4144.9	4147.7	KID63213.1	569	Zinc knuckle domain containing protein, partial	MAN_07414	A0A0B4EYN1	A0A0B4EYN1_METAN	unreviewed	Zinc knuckle domain containing protein (Fragment)	Metarhizium anisopliae ARSEF 549	569	GO:0000398; GO:0008270; GO:0045131	pre-mRNA branch point binding [GO:0045131]; zinc ion binding [GO:0008270]; mRNA splicing, via spliceosome [GO:0000398]	PF00013;PF16275;PF00098;	NULL	1 out of 5	NULL	KID63213;	K13095
MAN_05036	2124.47	-2.85615	0.113567	-25.1495	1.4325e-139	3.1169e-138	480.277	456.577	564.11	563.37	3196.78	3833.4	4289.63	3611.58	KID66755.1	718	hypothetical protein MAN_05036, partial	MAN_05036	A0A0B4EXY3	A0A0B4EXY3_METAN	unreviewed	Uncharacterized protein (Fragment)	Metarhizium anisopliae ARSEF 549	718	NULL	NULL	NULL	NULL	1 out of 5	NULL	KID66755;	NULL
MAN_08111	2022.89	-3.60953	0.143557	-25.1434	1.66702e-139	3.61947e-138	287.324	294.05	322.348	322.547	4914.9	3022.47	3538.85	3480.64	KID62895.1	537	cytochrome P450 52A11, partial	MAN_08111	A0A0B4ELD4	A0A0B4ELD4_METAN	unreviewed	Cytochrome P450 52A11 (Fragment)	Metarhizium anisopliae ARSEF 549	537	GO:0004497; GO:0005506; GO:0016705; GO:0020037	heme binding [GO:0020037]; iron ion binding [GO:0005506]; monooxygenase activity [GO:0004497]; oxidoreductase activity, acting on paired donors, with incorporation or reduction of molecular oxygen [GO:0016705]	PF00067;	NULL	1 out of 5	NULL	KID62895;	NULL
MAN_01259	1044.15	2.16452	0.0861317	25.1304	2.3142e-139	5.01394e-138	1779.55	1709.81	1664.63	1675.33	425.692	380.225	343.734	374.252	KID71660.1	243	O-methyltransferase, family 3, partial	MAN_01259	A0A0B4FCB2	A0A0B4FCB2_METAN	unreviewed	O-methyltransferase, family 3 (Fragment)	Metarhizium anisopliae ARSEF 549	243	GO:0008171	O-methyltransferase activity [GO:0008171]	PF01596;	NULL	1 out of 5	NULL	KID71660;	NULL
MAN_05213	1623.12	2.53142	0.100766	25.1218	2.87125e-139	6.20762e-138	2684.5	2628.6	2809.22	2948.13	416.482	444.67	491.479	561.893	KID65554.1	537	Amidohydrolase 3, partial	MAN_05213	A0A0B4GB94	A0A0B4GB94_METAN	unreviewed	Amidohydrolase 3 (Fragment)	Metarhizium anisopliae ARSEF 549	537	GO:0016810	hydrolase activity, acting on carbon-nitrogen (but not peptide) bonds [GO:0016810]	PF07969;	NULL	1 out of 5	NULL	KID65554;	NULL
MAN_03869	1320.19	-2.37737	0.0947859	-25.0815	7.91916e-139	1.70849e-137	423.823	416.18	447.006	419.05	1917.66	2188.98	2356.89	2391.91	KID67111.1	689	carboxylesterase family protein, partial	MAN_03869	A0A0B4FN29	A0A0B4FN29_METAN	unreviewed	Carboxylesterase family protein (Fragment)	Metarhizium anisopliae ARSEF 549	689	NULL	NULL	NULL	NULL	1 out of 5	NULL	KID67111;	NULL
MAN_04118	531.46	-2.73076	0.108878	-25.0809	8.02962e-139	1.72866e-137	149.981	132.464	135.991	137.365	977.249	922.637	839.232	956.764	KID67360.1	609	hypothetical protein MAN_04118, partial	MAN_04118	A0A0B4EZI2	A0A0B4EZI2_METAN	unreviewed	Uncharacterized protein (Fragment)	Metarhizium anisopliae ARSEF 549	609	NULL	NULL	NULL	NULL	1 out of 5	NULL	KID67360;	NULL
MAN_05877	3509.92	-1.95565	0.0780528	-25.0555	1.52213e-138	3.27001e-137	1520.88	1515.35	1383.83	1333.66	5118.53	5604.56	6004.28	5598.31	KID64866.1	1156	Breast cancer suppressor protein BRCT, partial	MAN_05877	A0A0B4FGA6	A0A0B4FGA6_METAN	unreviewed	Breast cancer suppressor protein BRCT (Fragment)	Metarhizium anisopliae ARSEF 549	1156	NULL	NULL	NULL	NULL	1 out of 5	NULL	KID64866;	NULL
MAN_10503	2145.31	1.96518	0.078469	25.044	2.02947e-138	4.35075e-137	3333.29	3206.37	3553.39	3570.62	832.964	908.674	945.77	811.394	KID59697.1	612	Amino acid/polyamine transporter I, partial	MAN_10503	A0A0B4EVD5	A0A0B4EVD5_METAN	unreviewed	Amino acid/polyamine transporter I (Fragment)	Metarhizium anisopliae ARSEF 549	612	GO:0015171; GO:0016021	integral component of membrane [GO:0016021]; amino acid transmembrane transporter activity [GO:0015171]	PF00324;	NULL	1 out of 5	NULL	KID59697;	K16261
MAN_04628	1815.07	2.07166	0.0827283	25.0417	2.15138e-138	4.60242e-137	2821	2854.07	3124.01	2931.61	750.077	691.709	616.107	732.007	KID66347.1	448	sulfate transporter, partial	MAN_04628	A0A0B4FEP8	A0A0B4FEP8_METAN	unreviewed	Sulfate transporter (Fragment)	Metarhizium anisopliae ARSEF 549	448	GO:0015098; GO:0016021	integral component of membrane [GO:0016021]; molybdate ion transmembrane transporter activity [GO:0015098]	PF16983;	NULL	1 out of 5	NULL	KID66347;	NULL
MAN_07364	792.546	2.65296	0.105943	25.0414	2.1653e-138	4.62249e-137	1474.53	1341.55	1354.87	1298.88	223.079	245.965	182.923	218.571	KID63163.1	334	gluconolactonase precursor, partial	MAN_07364	A0A0B4EYI1	A0A0B4EYI1_METAN	unreviewed	Gluconolactonase (Fragment)	Metarhizium anisopliae ARSEF 549	334	NULL	NULL	PF08450;	NULL	1 out of 5	NULL	KID63163;	K01053
MAN_06380	674.915	-4.09	0.163355	-25.0374	2.39355e-138	5.09906e-137	64.8795	60.1253	62.9587	109.544	1237.17	1289.97	1228.19	1346.48	KID65369.1	346	hypothetical protein MAN_06380, partial	MAN_06380	A0A0B4GAL8	A0A0B4GAL8_METAN	unreviewed	Uncharacterized protein (Fragment)	Metarhizium anisopliae ARSEF 549	346	GO:0016021	integral component of membrane [GO:0016021]	NULL	NULL	1 out of 5	NULL	KID65369;	NULL
MAN_05702	6244.68	2.18167	0.0871662	25.0289	2.96679e-138	6.30707e-137	10726.2	10736.1	9513.05	9958.09	1947.34	2433.87	2230.25	2412.53	KID66043.1	474	methylcitrate synthase precursor, partial	MAN_05702	A0A0B4F6F4	A0A0B4F6F4_METAN	unreviewed	Citrate synthase (Fragment)	Metarhizium anisopliae ARSEF 549	474	GO:0006099; GO:0046912	transferase activity, transferring acyl groups, acyl groups converted into alkyl on transfer [GO:0046912]; tricarboxylic acid cycle [GO:0006099]	PF00285;	NULL	1 out of 5	NULL	KID66043;	K01647
MAN_09889	40405.4	-1.605	0.0641689	-25.0122	4.50715e-138	9.56174e-137	20223.9	20417.2	19012.3	20315.2	56188.2	59114.3	64670.1	63302.1	KID60356.1	392	HEX1-like protein, partial	MAN_09889	A0A0B4F3B7	A0A0B4F3B7_METAN	unreviewed	HEX1-like protein (Fragment)	Metarhizium anisopliae ARSEF 549	392	GO:0003746; GO:0043022; GO:0045901	ribosome binding [GO:0043022]; translation elongation factor activity [GO:0003746]; positive regulation of translational elongation [GO:0045901]	NULL	NULL	1 out of 5	NULL	KID60356;	NULL
MAN_00295	824.396	8.17696	0.326948	25.0099	4.76759e-138	1.00932e-136	1662.43	1437.37	1669.66	1803.13	2.04659	5.37041	12.0608	3.09299	KID70696.1	295	hypothetical protein MAN_00295, partial	MAN_00295	A0A0B4FYH0	A0A0B4FYH0_METAN	unreviewed	Uncharacterized protein (Fragment)	Metarhizium anisopliae ARSEF 549	295	NULL	NULL	NULL	NULL	1 out of 5	NULL	KID70696;	NULL
MAN_09451	757.782	-2.82838	0.113092	-25.0096	4.8048e-138	1.01509e-136	182.842	173.8	197.69	194.745	1382.47	1461.83	1332.72	1136.16	KID61167.1	535	glycosyltransferase family 31, partial	MAN_09451	A0A0B4EZX8	A0A0B4EZX8_METAN	unreviewed	Glycosyltransferase family 31 (Fragment)	Metarhizium anisopliae ARSEF 549	535	GO:0016020; GO:0016757	membrane [GO:0016020]; transferase activity, transferring glycosyl groups [GO:0016757]	PF02434;	SIGNAL 1 25 {ECO:0000256|SAM:SignalP}.	1 out of 5	NULL	KID61167;	NULL
MAN_00631	376.837	1.77875	0.136061	13.0732	4.68807e-39	2.56246e-38	555.268	559.917	559.073	659.874	207.729	161.112	145.735	165.99	KID71032.1	733	ABC transporter-like protein, partial	MAN_00631	A0A0B4FTL6	A0A0B4FTL6_METAN	unreviewed	ABC transporter-like protein (Fragment)	Metarhizium anisopliae ARSEF 549	733	GO:0005524; GO:0016887	ATP binding [GO:0005524]; ATPase activity [GO:0016887]	PF00005;PF12848;	NULL	1 out of 5	NULL	KID71032;	NULL
MAN_08277	798.201	-5.50107	0.220195	-24.9828	9.41137e-138	1.98008e-136	32.8611	21.6075	30.2202	52.1639	1350.75	1617.57	1286.49	1993.95	KID62273.1	203	SCP-like extracellular protein, partial	MAN_08277	A0A0B4EW43	A0A0B4EW43_METAN	unreviewed	SCP-like extracellular protein (Fragment)	Metarhizium anisopliae ARSEF 549	203	GO:0005576; GO:0016021	extracellular region [GO:0005576]; integral component of membrane [GO:0016021]	PF00188;	SIGNAL 1 19 {ECO:0000256|SAM:SignalP}.	1 out of 5	NULL	KID62273;	NULL
MAN_03576	15065.7	1.94043	0.0777097	24.9703	1.28568e-137	2.69941e-136	24097.3	23670.6	24694.9	23152.1	7113.96	6113.68	5718.84	5964.31	KID68720.1	292	Spermine synthase, partial	MAN_03576	A0A0B4F3K3	A0A0B4F3K3_METAN	unreviewed	Spermine synthase (Fragment)	Metarhizium anisopliae ARSEF 549	292	GO:0006596; GO:0016740	transferase activity [GO:0016740]; polyamine biosynthetic process [GO:0006596]	PF17284;	NULL	1 out of 5	NULL	KID68720;	K00797
MAN_05809	1098.72	3.19192	0.127857	24.9648	1.47518e-137	3.0909e-136	2059.29	2257.52	1723.81	1882.25	200.566	181.52	231.166	253.625	KID64798.1	330	dihydrodipicolinate synthetase family protein, partial	MAN_05809	A0A0B4F2S5	A0A0B4F2S5_METAN	unreviewed	Dihydrodipicolinate synthetase family protein (Fragment)	Metarhizium anisopliae ARSEF 549	330	GO:0008152; GO:0016829	lyase activity [GO:0016829]; metabolic process [GO:0008152]	PF00701;	NULL	1 out of 5	NULL	KID64798;	NULL
MAN_04388	1088.73	1.72912	0.0693429	24.9358	3.04804e-137	6.37335e-136	1710.46	1681.63	1665.89	1633.6	520.858	490.856	507.56	499.002	KID67630.1	332	2-nitropropane dioxygenase, partial	MAN_04388	A0A0B4F0B9	A0A0B4F0B9_METAN	unreviewed	2-nitropropane dioxygenase (Fragment)	Metarhizium anisopliae ARSEF 549	332	GO:0018580; GO:0051213	dioxygenase activity [GO:0051213]; nitronate monooxygenase activity [GO:0018580]	PF03060;	NULL	1 out of 5	NULL	KID67630;	NULL
MAN_04466	921.661	-2.18699	0.0877186	-24.9319	3.35713e-137	7.00526e-136	328.611	355.115	285.832	353.845	1541.09	1526.27	1484.49	1498.04	KID67708.1	392	S-adenosyl-L-methionine-dependent methyltransferase, partial	MAN_04466	A0A0B4FAX0	A0A0B4FAX0_METAN	unreviewed	S-adenosyl-L-methionine-dependent methyltransferase (Fragment)	Metarhizium anisopliae ARSEF 549	392	GO:0008168	methyltransferase activity [GO:0008168]	NULL	NULL	1 out of 5	NULL	KID67708;	NULL
MAN_04754	20853.6	1.76036	0.070742	24.8842	1.10397e-136	2.29891e-135	32646.2	34032.8	30507.2	31620.9	8887.34	9402.52	9239.6	10492.4	KID66473.1	1155	pyruvate carboxylase, partial	MAN_04754	A0A0B4F7K6	A0A0B4F7K6_METAN	unreviewed	Pyruvate carboxylase (Fragment)	Metarhizium anisopliae ARSEF 549	1155	GO:0004075; GO:0004736; GO:0005524; GO:0006090; GO:0006094; GO:0009374; GO:0046872	ATP binding [GO:0005524]; biotin binding [GO:0009374]; biotin carboxylase activity [GO:0004075]; metal ion binding [GO:0046872]; pyruvate carboxylase activity [GO:0004736]; gluconeogenesis [GO:0006094]; pyruvate metabolic process [GO:0006090]	PF02785;PF00289;PF00364;PF02786;PF00682;PF02436;	NULL	2 out of 5	NULL	KID66473;	K01958
MAN_03067	508.668	4.30768	0.173196	24.8717	1.50622e-136	3.13017e-135	1001.84	921.608	997.265	953.73	56.2814	24.7039	60.3041	53.6118	KID68211.1	174	Membrane associated eicosanoid/glutathione metabolism-like domain protein, partial	MAN_03067	A0A0B4FR27	A0A0B4FR27_METAN	unreviewed	Membrane associated eicosanoid/glutathione metabolism-like domain protein (Fragment)	Metarhizium anisopliae ARSEF 549	174	GO:0016021	integral component of membrane [GO:0016021]	PF01124;	NULL	1 out of 5	NULL	KID68211;	NULL
MAN_10189	2252.28	1.76752	0.0711167	24.8538	2.35374e-136	4.8815e-135	3431.03	3512.63	3525.68	3457.6	1051.95	1112.75	933.709	992.849	KID60159.1	331	Cyclin PHO80-like protein, partial	MAN_10189	A0A0B4FV85	A0A0B4FV85_METAN	unreviewed	Cyclin PHO80-like protein (Fragment)	Metarhizium anisopliae ARSEF 549	331	GO:0000079; GO:0019901	protein kinase binding [GO:0019901]; regulation of cyclin-dependent protein serine/threonine kinase activity [GO:0000079]	PF08613;	NULL	1 out of 5	NULL	KID60159;	NULL
MAN_00968	1167.3	2.39461	0.0963566	24.8516	2.48644e-136	5.14622e-135	1966.61	1841.34	2082.67	1955.28	336.665	432.855	348.759	374.252	KID71369.1	554	hypothetical protein MAN_00968, partial	MAN_00968	A0A0B4GTK3	A0A0B4GTK3_METAN	unreviewed	Uncharacterized protein (Fragment)	Metarhizium anisopliae ARSEF 549	554	GO:0016021	integral component of membrane [GO:0016021]	NULL	NULL	1 out of 5	NULL	KID71369;	NULL
MAN_02926	28993.9	-2.28322	0.0919379	-24.8344	3.81542e-136	7.88081e-135	9469.88	9255.54	10368	10438.9	55829.1	45372.5	42911.4	48306.3	KID68070.1	299	hypothetical protein MAN_02926, partial	MAN_02926	A0A0B4F1Q1	A0A0B4F1Q1_METAN	unreviewed	Uncharacterized protein (Fragment)	Metarhizium anisopliae ARSEF 549	299	NULL	NULL	NULL	SIGNAL 1 19 {ECO:0000256|SAM:SignalP}.	1 out of 5	NULL	KID68070;	NULL
MAN_03931	4134.27	2.00789	0.0810219	24.782	1.40069e-135	2.8873e-134	6751.68	6521.72	6676.14	6537.88	1745.75	1805.53	1429.21	1606.29	KID67173.1	252	Calcipressin family protein, partial	MAN_03931	A0A0B4F9E1	A0A0B4F9E1_METAN	unreviewed	Calcipressin family protein (Fragment)	Metarhizium anisopliae ARSEF 549	252	GO:0003676; GO:0005622; GO:0019722	intracellular [GO:0005622]; nucleic acid binding [GO:0003676]; calcium-mediated signaling [GO:0019722]	PF04847;	NULL	1 out of 5	NULL	KID67173;	NULL
MAN_06320	337.282	-5.13819	0.207355	-24.7796	1.48634e-135	3.05766e-134	14.3241	14.0919	21.4059	25.2126	723.471	647.672	581.935	670.147	KID65309.1	473	trichodiene oxygenase, partial	MAN_06320	A0A0B4GAF8	A0A0B4GAF8_METAN	unreviewed	Trichodiene oxygenase (Fragment)	Metarhizium anisopliae ARSEF 549	473	GO:0004497; GO:0005506; GO:0016705; GO:0020037	heme binding [GO:0020037]; iron ion binding [GO:0005506]; monooxygenase activity [GO:0004497]; oxidoreductase activity, acting on paired donors, with incorporation or reduction of molecular oxygen [GO:0016705]	PF00067;	NULL	1 out of 5	NULL	KID65309;	NULL
MAN_06745	339.993	4.94398	0.199628	24.7659	2.08876e-135	4.28828e-134	731.369	637.892	581.738	683.347	17.3961	19.3335	24.1216	24.7439	KID64571.1	432	Globin, partial	MAN_06745	A0A0B4FFI9	A0A0B4FFI9_METAN	unreviewed	Globin (Fragment)	Metarhizium anisopliae ARSEF 549	432	GO:0005344; GO:0016491; GO:0020037; GO:0046872	heme binding [GO:0020037]; metal ion binding [GO:0046872]; oxidoreductase activity [GO:0016491]; oxygen transporter activity [GO:0005344]	PF00042;PF00175;	NULL	1 out of 5	NULL	KID64571;	NULL
MAN_06793	1838.6	2.31285	0.0935528	24.7224	6.14511e-135	1.25907e-133	3170.67	3097.39	2862.1	3114.19	662.073	532.745	580.93	688.705	KID64619.1	439	sarcosine oxidase, partial	MAN_06793	A0A0B4G8A5	A0A0B4G8A5_METAN	unreviewed	Sarcosine oxidase (Fragment)	Metarhizium anisopliae ARSEF 549	439	GO:0016491	oxidoreductase activity [GO:0016491]	PF01266;	NULL	1 out of 5	NULL	KID64619;	NULL
MAN_04614	356.398	5.22343	0.211467	24.7009	1.04653e-134	2.13992e-133	765.915	626.618	643.437	740.728	18.4194	18.2594	13.0659	24.7439	KID66333.1	282	enoyl-CoA hydratase/isomerase family protein, partial	MAN_04614	A0A0B4F738	A0A0B4F738_METAN	unreviewed	Enoyl-CoA hydratase/isomerase family protein (Fragment)	Metarhizium anisopliae ARSEF 549	282	GO:0008152; GO:0016853	isomerase activity [GO:0016853]; metabolic process [GO:0008152]	PF00378;	NULL	1 out of 5	NULL	KID66333;	NULL
MAN_00771	1676.17	-1.78291	0.0721816	-24.7003	1.06052e-134	2.16418e-133	730.527	773.174	744.171	771.157	2446.7	2506.91	2668.46	2768.22	KID71172.1	809	Inhibitor of Apoptosis domain containing protein, partial	MAN_00771	A0A0B4FTY2	A0A0B4FTY2_METAN	unreviewed	Inhibitor of Apoptosis domain containing protein (Fragment)	Metarhizium anisopliae ARSEF 549	809	NULL	NULL	PF00653;	NULL	1 out of 5	NULL	KID71172;	NULL
MAN_01212	1423.33	1.80949	0.073332	24.6753	1.9698e-134	4.0117e-133	2283.42	2256.58	2185.92	2133.5	682.539	597.19	639.224	608.288	KID71613.1	277	allantoin catabolism protein, partial	MAN_01212	A0A0B4FMJ1	A0A0B4FMJ1_METAN	unreviewed	Allantoin catabolism protein (Fragment)	Metarhizium anisopliae ARSEF 549	277	NULL	NULL	PF07883;PF05899;	NULL	1 out of 5	NULL	KID71613;	K14977
MAN_01588	6385.02	2.3995	0.0972492	24.6737	2.04925e-134	4.16518e-133	11086.8	10604.6	11098.4	10152	1710.95	1968.79	2092.55	2366.14	KID69074.1	414	O-methyltransferase, family 2, partial	MAN_01588	A0A0B4GLF5	A0A0B4GLF5_METAN	unreviewed	O-methyltransferase, family 2 (Fragment)	Metarhizium anisopliae ARSEF 549	414	GO:0008171	O-methyltransferase activity [GO:0008171]	PF16864;PF00891;	NULL	1 out of 5	NULL	KID69074;	NULL
MAN_09678	1143.52	-5.22554	0.211876	-24.6632	2.65757e-134	5.39084e-133	45.4999	50.7307	50.3669	90.4175	2823.28	2387.69	1721.68	1978.48	KID60543.1	235	ThiJ/PfpI family protein, partial	MAN_09678	A0A0B4EQU8	A0A0B4EQU8_METAN	unreviewed	ThiJ/PfpI family protein (Fragment)	Metarhizium anisopliae ARSEF 549	235	NULL	NULL	PF01965;	NULL	1 out of 5	NULL	KID60543;	NULL
MAN_09255	472.842	-5.6767	0.230182	-24.6617	2.75446e-134	5.57628e-133	16.8518	12.213	10.0734	31.2984	870.826	982.785	807.07	1051.62	KID61490.1	172	hypothetical protein MAN_09255, partial	MAN_09255	A0A0B4EH91	A0A0B4EH91_METAN	unreviewed	Uncharacterized protein (Fragment)	Metarhizium anisopliae ARSEF 549	172	NULL	NULL	NULL	SIGNAL 1 16 {ECO:0000256|SAM:SignalP}.	1 out of 5	NULL	KID61490;	NULL
MAN_04999	1290.98	2.08656	0.0846439	24.6511	3.58533e-134	7.24394e-133	2157.03	2057.41	2134.3	2010.92	426.715	517.708	519.621	504.157	KID66718.1	592	Major facilitator superfamily domain, general substrate transporter, partial	MAN_04999	A0A0B4F884	A0A0B4F884_METAN	unreviewed	Major facilitator superfamily domain, general substrate transporter (Fragment)	Metarhizium anisopliae ARSEF 549	592	GO:0016021; GO:0055085	integral component of membrane [GO:0016021]; transmembrane transport [GO:0055085]	PF07690;	NULL	1 out of 5	NULL	KID66718;	NULL
MAN_04155	1524.65	-1.59846	0.0649056	-24.6275	6.41007e-134	1.29255e-132	722.101	743.111	771.873	792.022	2303.44	2294.24	2237.28	2333.14	KID67397.1	692	Kinetochore protein Ndc80, partial	MAN_04155	A0A0B4FHP4	A0A0B4FHP4_METAN	unreviewed	Kinetochore protein Ndc80 (Fragment)	Metarhizium anisopliae ARSEF 549	692	NULL	NULL	PF03801;	NULL	1 out of 5	NULL	KID67397;	K11547
MAN_09894	2991.67	2.8708	0.116592	24.6226	7.23649e-134	1.45631e-132	5117.9	5522.13	5321.27	5093.81	566.907	685.265	751.791	874.285	KID60361.1	495	Glycosyl transferase, family 2, partial	MAN_09894	A0A0B4F3C2	A0A0B4F3C2_METAN	unreviewed	Glycosyl transferase, family 2 (Fragment)	Metarhizium anisopliae ARSEF 549	495	GO:0016021; GO:0016740	integral component of membrane [GO:0016021]; transferase activity [GO:0016740]	NULL	NULL	1 out of 5	NULL	KID60361;	NULL
MAN_02870	1869.55	-1.67293	0.0679511	-24.6196	7.78246e-134	1.56309e-132	880.508	928.184	876.384	885.048	3039.19	2844.17	2698.61	2804.31	KID68014.1	536	vacuolar Zn-iron permease, partial	MAN_02870	A0A0B4GI66	A0A0B4GI66_METAN	unreviewed	Vacuolar Zn-iron permease (Fragment)	Metarhizium anisopliae ARSEF 549	536	GO:0016021; GO:0046873	integral component of membrane [GO:0016021]; metal ion transmembrane transporter activity [GO:0046873]	PF02535;	NULL	1 out of 5	NULL	KID68014;	K07238
MAN_08343	1990.31	-2.50827	0.101901	-24.6148	8.77537e-134	1.75905e-132	577.175	585.282	564.11	652.049	2830.44	3636.84	3443.37	3633.23	KID62339.1	638	hypothetical protein MAN_08343, partial	MAN_08343	A0A0B4G1L5	A0A0B4G1L5_METAN	unreviewed	Uncharacterized protein (Fragment)	Metarhizium anisopliae ARSEF 549	638	NULL	NULL	PF10263;PF17283;	NULL	1 out of 5	NULL	KID62339;	NULL
MAN_01925	2638.15	-2.22246	0.0903524	-24.5977	1.33718e-133	2.67514e-132	982.461	919.729	907.864	912.869	4077.84	5057.85	4129.83	4116.77	KID69411.1	477	DUF563 domain protein, partial	MAN_01925	A0A0B4FUN4	A0A0B4FUN4_METAN	unreviewed	DUF563 domain protein (Fragment)	Metarhizium anisopliae ARSEF 549	477	GO:0016757	transferase activity, transferring glycosyl groups [GO:0016757]	PF04577;	NULL	1 out of 5	NULL	KID69411;	K18134
MAN_02101	922.689	-3.9803	0.161842	-24.5937	1.47549e-133	2.94606e-132	105.324	120.251	99.4747	113.891	2043.53	2018.2	1309.6	1571.24	KID69587.1	336	hypothetical protein MAN_02101, partial	MAN_02101	A0A0B4FPA2	A0A0B4FPA2_METAN	unreviewed	Uncharacterized protein (Fragment)	Metarhizium anisopliae ARSEF 549	336	NULL	NULL	NULL	NULL	1 out of 5	NULL	KID69587;	NULL
MAN_05910	2272.35	-2.74833	0.111909	-24.5586	3.50413e-133	6.98289e-132	551.897	567.433	613.217	623.359	3312.41	4129.85	3730.82	4649.79	KID64899.1	180	Ubiquitin-conjugating enzyme, active site protein, partial	MAN_05910	A0A0B4G940	A0A0B4G940_METAN	unreviewed	Ubiquitin-conjugating enzyme, active site protein (Fragment)	Metarhizium anisopliae ARSEF 549	180	GO:0005524	ATP binding [GO:0005524]	PF00179;	NULL	1 out of 5	NULL	KID64899;	K06688
MAN_04523	497.085	3.08809	0.125746	24.5581	3.54205e-133	7.04466e-132	884.721	822.965	873.866	976.335	85.957	114.927	105.532	112.379	KID66242.1	411	hypothetical protein MAN_04523, partial	MAN_04523	A0A0B4FEE2	A0A0B4FEE2_METAN	unreviewed	Uncharacterized protein (Fragment)	Metarhizium anisopliae ARSEF 549	411	NULL	NULL	PF12697;	NULL	1 out of 5	NULL	KID66242;	NULL
MAN_09708	1101.18	1.48659	0.105427	14.1006	3.76422e-45	2.3516e-44	1564.69	1622.44	1679.74	1625.78	681.516	611.153	505.55	518.591	KID60573.1	1478	ABC transporter family protein, partial	MAN_09708	A0A0B4EQX5	A0A0B4EQX5_METAN	unreviewed	ABC transporter family protein (Fragment)	Metarhizium anisopliae ARSEF 549	1478	GO:0005524; GO:0016021; GO:0042626	integral component of membrane [GO:0016021]; ATP binding [GO:0005524]; ATPase activity, coupled to transmembrane movement of substances [GO:0042626]	PF00664;PF00005;	NULL	1 out of 5	NULL	KID60573;	NULL
MAN_04103	935.941	4.13109	0.16862	24.4993	1.50093e-132	2.97353e-131	1706.25	1614.93	1886.24	1875.29	93.1201	125.668	62.3143	123.72	KID67345.1	337	hypothetical protein MAN_04103, partial	MAN_04103	A0A0B4EZH6	A0A0B4EZH6_METAN	unreviewed	Uncharacterized protein (Fragment)	Metarhizium anisopliae ARSEF 549	337	GO:0016021	integral component of membrane [GO:0016021]	NULL	NULL	1 out of 5	NULL	KID67345;	NULL
MAN_00605	3307.5	1.69592	0.0692601	24.4863	2.06698e-132	4.08701e-131	5244.29	5422.55	4781.08	4770.39	1540.06	1579.98	1607.1	1514.53	KID71006.1	267	Ubiquitin, partial	MAN_00605	A0A0B4FZ61	A0A0B4FZ61_METAN	unreviewed	Ubiquitin (Fragment)	Metarhizium anisopliae ARSEF 549	267	NULL	NULL	NULL	NULL	1 out of 5	NULL	KID71006;	NULL
MAN_06234	1526.83	-3.14726	0.128652	-24.4634	3.62655e-132	7.15681e-131	334.509	293.111	261.908	346.021	2272.74	2776.5	2693.58	3236.3	KID65223.1	243	hypothetical protein MAN_06234, partial	MAN_06234	A0A0B4F401	A0A0B4F401_METAN	unreviewed	Uncharacterized protein (Fragment)	Metarhizium anisopliae ARSEF 549	243	GO:0016021	integral component of membrane [GO:0016021]	NULL	SIGNAL 1 18 {ECO:0000256|SAM:SignalP}.	1 out of 5	NULL	KID65223;	NULL
MAN_06133	340.249	-5.05703	0.206775	-24.4567	4.26829e-132	8.40696e-131	21.0648	14.0919	25.1835	19.9962	625.235	597.19	776.918	642.311	KID65122.1	128	hypothetical protein MAN_06133, partial	MAN_06133	A0A0B4FBR3	A0A0B4FBR3_METAN	unreviewed	Uncharacterized protein (Fragment)	Metarhizium anisopliae ARSEF 549	128	NULL	NULL	NULL	SIGNAL 1 16 {ECO:0000256|SAM:SignalP}.	1 out of 5	NULL	KID65122;	NULL
MAN_04746	4674.58	-3.25445	0.133176	-24.4373	6.8683e-132	1.35019e-130	878.823	891.546	865.052	911.13	6138.76	9353.11	8380.26	9977.98	KID66465.1	848	SAM and PH domain-containing protein, partial	MAN_04746	A0A0B4EX15	A0A0B4EX15_METAN	unreviewed	SAM and PH domain-containing protein (Fragment)	Metarhizium anisopliae ARSEF 549	848	NULL	NULL	PF00169;PF07647;	NULL	1 out of 5	NULL	KID66465;	NULL
MAN_08146	1065.64	2.68638	0.110078	24.4043	1.53878e-131	3.01915e-130	1715.52	1845.1	1927.79	1890.07	234.335	324.373	270.363	317.547	KID62930.1	339	serine family amino acid catabolism- protein, partial	MAN_08146	A0A0B4ELH5	A0A0B4ELH5_METAN	unreviewed	Serine family amino acid catabolism-protein (Fragment)	Metarhizium anisopliae ARSEF 549	339	GO:0006520; GO:0030170	pyridoxal phosphate binding [GO:0030170]; cellular amino acid metabolic process [GO:0006520]	PF00291;	NULL	1 out of 5	NULL	KID62930;	K17989
MAN_06006	1266.57	9.35057	0.383596	24.3761	3.0682e-131	6.00837e-130	2413.18	2347.71	2746.26	2609.94	5.11649	5.37041	5.02534	0	KID64995.1	260	NAD(P)-binding domain protein, partial	MAN_06006	A0A0B4ESR0	A0A0B4ESR0_METAN	unreviewed	NAD(P)-binding domain protein (Fragment)	Metarhizium anisopliae ARSEF 549	260	GO:0016491	oxidoreductase activity [GO:0016491]	NULL	NULL	1 out of 5	NULL	KID64995;	NULL
MAN_07385	707.623	2.78101	0.114155	24.3618	4.34951e-131	8.50116e-130	1274.84	1152.71	1181.1	1332.79	164.751	182.594	159.806	212.385	KID63184.1	209	NADPH-dependent FMN reductase, partial	MAN_07385	A0A0B4G430	A0A0B4G430_METAN	unreviewed	NADPH-dependent FMN reductase (Fragment)	Metarhizium anisopliae ARSEF 549	209	GO:0016491	oxidoreductase activity [GO:0016491]	PF03358;	NULL	1 out of 5	NULL	KID63184;	NULL
MAN_08657	1687.12	1.9021	0.0784001	24.2615	5.00326e-130	9.76019e-129	2534.51	2743.22	2848.25	2523.86	722.448	659.487	752.796	712.418	KID61978.1	714	Fungal transcriptional regulatory protein, partial	MAN_08657	A0A0B4EV95	A0A0B4EV95_METAN	unreviewed	Fungal transcriptional regulatory protein (Fragment)	Metarhizium anisopliae ARSEF 549	714	GO:0000981; GO:0005634; GO:0008270	nucleus [GO:0005634]; RNA polymerase II transcription factor activity, sequence-specific DNA binding [GO:0000981]; zinc ion binding [GO:0008270]	PF00172;	NULL	1 out of 5	NULL	KID61978;	NULL
MAN_08169	1977.51	3.74862	0.154592	24.2484	6.86758e-130	1.33714e-128	3580.17	3473.18	4029.35	3641.91	378.62	264.224	200.009	252.594	KID62165.1	150	hypothetical protein MAN_08169, partial	MAN_08169	A0A0B4EJ63	A0A0B4EJ63_METAN	unreviewed	Uncharacterized protein (Fragment)	Metarhizium anisopliae ARSEF 549	150	NULL	NULL	NULL	SIGNAL 1 19 {ECO:0000256|SAM:SignalP}.	1 out of 5	NULL	KID62165;	NULL
MAN_01305	1701.17	2.31654	0.0955744	24.2381	8.8242e-130	1.71482e-128	2935.59	2856.89	2859.58	2682.1	667.19	543.486	497.509	567.048	KID71706.1	795	mucoidy inhibitor-like protein, partial	MAN_01305	A0A0B4G197	A0A0B4G197_METAN	unreviewed	Mucoidy inhibitor-like protein (Fragment)	Metarhizium anisopliae ARSEF 549	795	NULL	NULL	PF13598;PF13600;	NULL	1 out of 5	NULL	KID71706;	NULL
MAN_08144	1139.16	-2.89865	0.119604	-24.2355	9.41037e-130	1.82525e-128	298.277	279.958	248.057	249.517	1746.77	2214.76	1822.19	2253.76	KID62928.1	146	PRO41 protein, partial	MAN_08144	A0A0B4EXU4	A0A0B4EXU4_METAN	unreviewed	PRO41 protein (Fragment)	Metarhizium anisopliae ARSEF 549	146	GO:0016021	integral component of membrane [GO:0016021]	NULL	NULL	1 out of 5	NULL	KID62928;	NULL
MAN_08425	1633.94	1.8141	0.0749291	24.2109	1.70977e-129	3.31e-128	2550.52	2594.78	2478.05	2554.29	714.262	673.45	804.055	702.108	KID62421.1	616	MFS multidrug transporter, partial	MAN_08425	A0A0B4F9C4	A0A0B4F9C4_METAN	unreviewed	MFS multidrug transporter (Fragment)	Metarhizium anisopliae ARSEF 549	616	GO:0016021; GO:0055085	integral component of membrane [GO:0016021]; transmembrane transport [GO:0055085]	PF07690;	NULL	1 out of 5	NULL	KID62421;	NULL
MAN_07098	2194.26	-2.11911	0.0875869	-24.1944	2.54938e-129	4.92607e-128	827.425	781.629	799.575	874.615	3183.48	3544.47	3552.92	3989.95	KID63927.1	668	Oxidoreductase, molybdopterin-binding domain protein, partial	MAN_07098	A0A0B4F840	A0A0B4F840_METAN	unreviewed	Oxidoreductase, molybdopterin-binding domain protein (Fragment)	Metarhizium anisopliae ARSEF 549	668	GO:0016491; GO:0030151; GO:0042128	molybdenum ion binding [GO:0030151]; oxidoreductase activity [GO:0016491]; nitrate assimilation [GO:0042128]	PF00173;PF03404;PF00174;	NULL	1 out of 5	NULL	KID63927;	K00387
MAN_02826	1421.11	-2.78174	0.114997	-24.1897	2.85594e-129	5.50796e-128	345.462	342.902	352.568	401.662	2076.27	2678.76	2365.93	2805.34	KID67970.1	462	kinetochore protein nuf2, partial	MAN_02826	A0A0B4F193	A0A0B4F193_METAN	unreviewed	Kinetochore protein nuf2 (Fragment)	Metarhizium anisopliae ARSEF 549	462	GO:0000278; GO:0000775	chromosome, centromeric region [GO:0000775]; mitotic cell cycle [GO:0000278]	PF03800;	NULL	1 out of 5	NULL	KID67970;	K11548
MAN_03066	3532.91	-2.93455	0.121353	-24.1819	3.44966e-129	6.64044e-128	847.647	820.147	734.098	865.052	5268.96	5629.27	7702.85	6395.27	KID68210.1	887	Glycoside hydrolase, family 3, partial	MAN_03066	A0A0B4F209	A0A0B4F209_METAN	unreviewed	Beta-glucosidase (EC 3.2.1.21) (Fragment)	Metarhizium anisopliae ARSEF 549	887	GO:0008422; GO:0030245; GO:0102483	beta-glucosidase activity [GO:0008422]; scopolin beta-glucosidase activity [GO:0102483]; cellulose catabolic process [GO:0030245]	PF14310;PF00933;PF01915;	SIGNAL 1 19 {ECO:0000256|SAM:SignalP}.	2 out of 5	NULL	KID68210;	K05349
MAN_00635	396.288	-3.65659	0.15124	-24.1774	3.84836e-129	7.39394e-128	54.7684	58.2464	73.032	49.5557	687.656	838.858	685.457	722.728	KID71036.1	526	glycosyltransferase family 31 protein, partial	MAN_00635	A0A0B4FZ83	A0A0B4FZ83_METAN	unreviewed	Glycosyltransferase family 31 protein (Fragment)	Metarhizium anisopliae ARSEF 549	526	GO:0016740	transferase activity [GO:0016740]	NULL	NULL	1 out of 5	NULL	KID71036;	NULL
MAN_04660	3425.02	2.51738	0.104153	24.1702	4.58341e-129	8.78961e-128	6005.15	6162.84	5579.4	5578.93	1241.26	891.488	968.886	972.229	KID66379.1	528	Major facilitator superfamily domain, general substrate transporter, partial	MAN_04660	A0A0B4GDM7	A0A0B4GDM7_METAN	unreviewed	Major facilitator superfamily domain, general substrate transporter (Fragment)	Metarhizium anisopliae ARSEF 549	528	GO:0016021; GO:0055085	integral component of membrane [GO:0016021]; transmembrane transport [GO:0055085]	PF07690;	NULL	1 out of 5	NULL	KID66379;	NULL
MAN_09504	7906.15	1.92007	0.0795269	24.1436	8.7178e-129	1.66867e-127	12427.4	12348.2	12703.8	12549.8	3752.43	3370.47	2965.96	3131.14	KID60776.1	979	Lethal giant larvae (Lgl)-like protein, partial	MAN_09504	A0A0B4F4G2	A0A0B4F4G2_METAN	unreviewed	Lethal giant larvae (Lgl)-like protein (Fragment)	Metarhizium anisopliae ARSEF 549	979	NULL	NULL	PF08596;	NULL	1 out of 5	NULL	KID60776;	K08518
MAN_02257	3218.05	-2.25204	0.0934102	-24.1092	2.00191e-128	3.82466e-127	1089.47	1029.65	1232.73	1118.05	4657.03	5932.16	5271.59	5413.76	KID69743.1	1464	DNA-directed DNA polymerase, family B, pol2, partial	MAN_02257	A0A0B4FGZ4	A0A0B4FGZ4_METAN	unreviewed	DNA polymerase (EC 2.7.7.7) (Fragment)	Metarhizium anisopliae ARSEF 549	1464	GO:0000166; GO:0001882; GO:0003677; GO:0003887; GO:0005634; GO:0006270; GO:0008408; GO:0046872; GO:0051539	nucleus [GO:0005634]; 3'-5' exonuclease activity [GO:0008408]; 4 iron, 4 sulfur cluster binding [GO:0051539]; DNA binding [GO:0003677]; DNA-directed DNA polymerase activity [GO:0003887]; metal ion binding [GO:0046872]; nucleoside binding [GO:0001882]; nucleotide binding [GO:0000166]; DNA replication initiation [GO:0006270]	PF12254;PF00136;PF03104;PF08996;	NULL	2 out of 5	NULL	KID69743;	K02320
MAN_10459	1205.83	-2.58148	0.107245	-24.0709	5.03997e-128	9.61087e-127	365.685	376.723	282.055	352.106	1827.61	2126.68	2156.88	2158.91	KID59818.1	1367	hypothetical protein MAN_10459, partial	MAN_10459	A0A0B4ENI3	A0A0B4ENI3_METAN	unreviewed	Uncharacterized protein (Fragment)	Metarhizium anisopliae ARSEF 549	1367	NULL	NULL	NULL	NULL	1 out of 5	NULL	KID59818;	NULL
MAN_09595	1614.65	3.06221	0.127274	24.0599	6.57209e-128	1.25091e-126	2984.46	2838.1	2777.74	2935.96	434.901	281.41	293.48	371.159	KID60867.1	221	glutathione-s-transferase theta, gst, partial	MAN_09595	A0A0B4EYV3	A0A0B4EYV3_METAN	unreviewed	Glutathione-s-transferase theta, gst (Fragment)	Metarhizium anisopliae ARSEF 549	221	GO:0016740	transferase activity [GO:0016740]	PF00043;PF02798;	NULL	1 out of 5	NULL	KID60867;	K00799
MAN_04035	1036.48	-2.39606	0.0996881	-24.0355	1.18298e-127	2.24744e-126	319.342	325.992	352.568	327.763	1798.96	1627.23	1576.95	1963.02	KID67277.1	325	F-box domain-containing protein, partial	MAN_04035	A0A0B4FHD6	A0A0B4FHD6_METAN	unreviewed	F-box domain-containing protein (Fragment)	Metarhizium anisopliae ARSEF 549	325	NULL	NULL	PF00646;	NULL	1 out of 5	NULL	KID67277;	NULL
MAN_10349	1285.23	3.11218	0.129605	24.0127	2.04673e-127	3.88117e-126	2406.44	2402.19	2236.29	2171.76	323.362	196.557	286.445	258.78	KID59897.1	587	Transmembrane amino acid transporter family protein, partial	MAN_10349	A0A0B4EVY8	A0A0B4EVY8_METAN	unreviewed	Transmembrane amino acid transporter family protein (Fragment)	Metarhizium anisopliae ARSEF 549	587	GO:0016021	integral component of membrane [GO:0016021]	PF01490;	NULL	1 out of 5	NULL	KID59897;	NULL
MAN_00808	1775.01	4.56696	0.190218	24.0091	2.23237e-127	4.22532e-126	3195.95	3067.33	3781.3	3581.05	220.009	111.705	141.715	101.038	KID71209.1	252	hypothetical protein MAN_00808, partial	MAN_00808	A0A0B4GT10	A0A0B4GT10_METAN	unreviewed	Uncharacterized protein (Fragment)	Metarhizium anisopliae ARSEF 549	252	GO:0016021	integral component of membrane [GO:0016021]	NULL	NULL	1 out of 5	NULL	KID71209;	NULL
MAN_06108	648.555	3.05291	0.12749	23.9462	1.01202e-126	1.91196e-125	1101.27	1229.75	1104.29	1195.42	135.075	111.705	136.689	174.238	KID65097.1	240	YcaC amidohydrolase, partial	MAN_06108	A0A0B4FBN5	A0A0B4FBN5_METAN	unreviewed	YcaC amidohydrolase (Fragment)	Metarhizium anisopliae ARSEF 549	240	GO:0008152; GO:0016787	hydrolase activity [GO:0016787]; metabolic process [GO:0008152]	PF00857;	SIGNAL 1 17 {ECO:0000256|SAM:SignalP}.	1 out of 5	NULL	KID65097;	NULL
MAN_07661	628.501	2.75077	0.114999	23.9198	1.90576e-126	3.59377e-125	1170.36	1144.26	1040.08	1023.28	174.984	135.334	179.907	159.804	KID63460.1	205	hypothetical protein MAN_07661, partial	MAN_07661	A0A0B4EN15	A0A0B4EN15_METAN	unreviewed	Uncharacterized protein (Fragment)	Metarhizium anisopliae ARSEF 549	205	NULL	NULL	NULL	SIGNAL 1 18 {ECO:0000256|SAM:SignalP}.	1 out of 5	NULL	KID63460;	NULL
MAN_07107	7020.79	-2.71772	0.0907614	-29.9436	5.33227e-197	1.92548e-195	1755.12	1733.3	1959.27	1965.71	11293.1	12200.5	11273.9	13985.5	KID63936.1	244	Heat shock protein DnaJ, partial	MAN_07107	A0A0B4FDH5	A0A0B4FDH5_METAN	unreviewed	Heat shock protein DnaJ (Fragment)	Metarhizium anisopliae ARSEF 549	244	GO:0016021	integral component of membrane [GO:0016021]	PF00226;	NULL	1 out of 5	NULL	KID63936;	NULL
MAN_09976	2464.27	-3.56788	0.149388	-23.8833	4.56748e-126	8.58131e-125	355.573	389.875	356.346	430.352	3424.98	4917.15	4113.75	5726.15	KID60443.1	446	hypothetical protein MAN_09976, partial	MAN_09976	A0A0B4EQF6	A0A0B4EQF6_METAN	unreviewed	Uncharacterized protein (Fragment)	Metarhizium anisopliae ARSEF 549	446	NULL	NULL	NULL	SIGNAL 1 28 {ECO:0000256|SAM:SignalP}.	1 out of 5	NULL	KID60443;	NULL
MAN_07345	641.998	-2.67208	0.112098	-23.837	1.38146e-125	2.59069e-124	146.611	181.315	176.284	193.007	1040.69	1142.82	1061.35	1193.89	KID63144.1	484	DNA replication regulator SLD2, partial	MAN_07345	A0A0B4G3Z3	A0A0B4G3Z3_METAN	unreviewed	DNA replication regulator SLD2 (Fragment)	Metarhizium anisopliae ARSEF 549	484	NULL	NULL	PF11719;	NULL	1 out of 5	NULL	KID63144;	NULL
MAN_00801	410.174	-3.15366	0.132499	-23.8013	3.23554e-125	6.05652e-124	77.5184	89.2485	84.3646	80.8541	659.004	827.043	744.756	718.604	KID71202.1	349	hypothetical protein MAN_00801, partial	MAN_00801	A0A0B4FU08	A0A0B4FU08_METAN	unreviewed	Uncharacterized protein (Fragment)	Metarhizium anisopliae ARSEF 549	349	GO:0016021	integral component of membrane [GO:0016021]	NULL	NULL	1 out of 5	NULL	KID71202;	NULL
MAN_03627	2151.85	-4.81441	0.202482	-23.7769	5.78535e-125	1.08096e-123	155.037	130.585	107.03	195.615	2656.48	4807.59	4754.98	4407.51	KID68771.1	673	MedA, partial	MAN_03627	A0A0B4FST2	A0A0B4FST2_METAN	unreviewed	MedA (Fragment)	Metarhizium anisopliae ARSEF 549	673	NULL	NULL	NULL	NULL	1 out of 5	NULL	KID68771;	NULL
MAN_04780	2457.12	-3.44142	0.125194	-27.4888	2.38763e-166	6.50088e-165	395.175	368.268	450.784	444.263	5296.59	3724.92	4872.57	4104.4	KID66499.1	356	C2H2 finger domain protein FlbC, partial	MAN_04780	A0A0B4GE45	A0A0B4GE45_METAN	unreviewed	C2H2 finger domain protein FlbC (Fragment)	Metarhizium anisopliae ARSEF 549	356	GO:0003676	nucleic acid binding [GO:0003676]	NULL	NULL	1 out of 5	NULL	KID66499;	NULL
MAN_09776	1595.89	-1.59502	0.0671511	-23.7527	1.02919e-124	1.91595e-123	805.517	826.723	744.171	795.5	2339.26	2370.5	2373.97	2511.51	KID60641.1	812	Glycosyl hydrolase 92, partial	MAN_09776	A0A0B4F432	A0A0B4F432_METAN	unreviewed	Glycosyl hydrolase 92 (Fragment)	Metarhizium anisopliae ARSEF 549	812	GO:0016787; GO:0030246	carbohydrate binding [GO:0030246]; hydrolase activity [GO:0016787]	PF07971;	SIGNAL 1 19 {ECO:0000256|SAM:SignalP}.	1 out of 5	NULL	KID60641;	NULL
MAN_04441	1510.4	2.15259	0.090667	23.7417	1.3389e-124	2.48796e-123	2353.36	2389.04	2601.45	2521.26	474.81	568.19	610.077	564.986	KID67683.1	358	ATP synthase F0, partial	MAN_04441	A0A0B4FAU1	A0A0B4FAU1_METAN	unreviewed	ATP synthase F0 (Fragment)	Metarhizium anisopliae ARSEF 549	358	GO:0016021	integral component of membrane [GO:0016021]	NULL	NULL	1 out of 5	NULL	KID67683;	NULL
MAN_03608	921.011	3.18668	0.134396	23.7112	2.76565e-124	5.1298e-123	1622.83	1542.59	1720.03	1753.58	237.405	180.446	165.836	145.37	KID68752.1	318	short-chain dehydrogenase, partial	MAN_03608	A0A0B4FLN8	A0A0B4FLN8_METAN	unreviewed	Short-chain dehydrogenase (Fragment)	Metarhizium anisopliae ARSEF 549	318	NULL	NULL	PF00106;	NULL	1 out of 5	NULL	KID68752;	NULL
MAN_04246	2406.94	-2.15039	0.0907283	-23.7015	3.48152e-124	6.44587e-123	842.591	822.026	970.822	907.652	3437.26	4152.4	3973.04	4149.76	KID67488.1	1589	DNA replication factor Dna2, partial	MAN_04246	A0A0B4FAA1	A0A0B4FAA1_METAN	unreviewed	DNA replication factor Dna2 (Fragment)	Metarhizium anisopliae ARSEF 549	1589	GO:0017108; GO:0033567; GO:0043142	5'-flap endonuclease activity [GO:0017108]; single-stranded DNA-dependent ATPase activity [GO:0043142]; DNA replication, Okazaki fragment processing [GO:0033567]	PF01930;PF08696;	NULL	1 out of 5	NULL	KID67488;	K10742
MAN_01255	1221.45	-3.54043	0.149421	-23.6943	4.1247e-124	7.62284e-123	193.796	191.649	212.8	176.488	1798.96	2425.28	1953.85	2818.74	KID71656.1	645	hypothetical protein MAN_01255, partial	MAN_01255	A0A0B4G148	A0A0B4G148_METAN	unreviewed	Uncharacterized protein (Fragment)	Metarhizium anisopliae ARSEF 549	645	NULL	NULL	NULL	NULL	1 out of 5	NULL	KID71656;	NULL
MAN_07097	1278.23	1.95916	0.0827451	23.6771	6.2084e-124	1.14529e-122	2182.31	2089.35	1939.13	1922.24	511.649	561.745	527.661	491.785	KID63926.1	320	F-box domain protein, partial	MAN_07097	A0A0B4FDG6	A0A0B4FDG6_METAN	unreviewed	F-box domain protein (Fragment)	Metarhizium anisopliae ARSEF 549	320	NULL	NULL	PF12014;	NULL	1 out of 5	NULL	KID63926;	NULL
MAN_03312	478.157	-2.73414	0.115493	-23.6736	6.74462e-124	1.24196e-122	123.018	125.887	130.954	120.846	763.38	848.525	792.999	919.649	KID68456.1	397	RYP2-like protein, partial	MAN_03312	A0A0B4FRV4	A0A0B4FRV4_METAN	unreviewed	RYP2-like protein (Fragment)	Metarhizium anisopliae ARSEF 549	397	NULL	NULL	PF11754;	NULL	1 out of 5	NULL	KID68456;	NULL
MAN_00467	1494.11	-2.68772	0.11356	-23.6677	7.75376e-124	1.42521e-122	332.824	394.572	449.525	432.091	2400.66	2571.35	2422.22	2949.68	KID70868.1	336	SUR7 protein, partial	MAN_00467	A0A0B4FKA3	A0A0B4FKA3_METAN	unreviewed	SUR7 protein (Fragment)	Metarhizium anisopliae ARSEF 549	336	GO:0005886; GO:0016021	integral component of membrane [GO:0016021]; plasma membrane [GO:0005886]	PF06687;	NULL	1 out of 5	NULL	KID70868;	NULL
MAN_10155	1243.95	-1.66008	0.0702406	-23.6342	1.71405e-123	3.14489e-122	634.471	583.403	601.885	572.064	1882.87	1932.27	1914.66	1830.02	KID60125.1	348	DNA repair protein RAD51, partial	MAN_10155	A0A0B4ED95	A0A0B4ED95_METAN	unreviewed	DNA repair protein RAD51 (Fragment)	Metarhizium anisopliae ARSEF 549	348	GO:0000150; GO:0000724; GO:0003690; GO:0003697; GO:0005524; GO:0005634; GO:0008094; GO:1990426	nucleus [GO:0005634]; ATP binding [GO:0005524]; DNA-dependent ATPase activity [GO:0008094]; double-stranded DNA binding [GO:0003690]; recombinase activity [GO:0000150]; single-stranded DNA binding [GO:0003697]; double-strand break repair via homologous recombination [GO:0000724]; mitotic recombination-dependent replication fork processing [GO:1990426]	PF08423;	NULL	2 out of 5	NULL	KID60125;	K04482
MAN_09944	7780.14	3.10918	0.1318	23.5901	4.8698e-123	8.91892e-122	13973.5	13287.7	14717.2	13799.1	2163.25	1443.57	1482.48	1374.32	KID60411.1	331	SUR7 protein, partial	MAN_09944	A0A0B4F3G5	A0A0B4F3G5_METAN	unreviewed	SUR7 protein (Fragment)	Metarhizium anisopliae ARSEF 549	331	GO:0005886; GO:0016021	integral component of membrane [GO:0016021]; plasma membrane [GO:0005886]	PF06687;	NULL	1 out of 5	NULL	KID60411;	NULL
MAN_02587	2881.31	-2.10384	0.0892032	-23.5848	5.51705e-123	1.00862e-121	1005.21	1133.93	1064	1146.74	4360.27	5063.22	4227.32	5049.82	KID70073.1	303	Phospholipase C/P1 nuclease, core, partial	MAN_02587	A0A0B4FI15	A0A0B4FI15_METAN	unreviewed	Phospholipase C/P1 nuclease, core (Fragment)	Metarhizium anisopliae ARSEF 549	303	GO:0003676; GO:0004519; GO:0006308	endonuclease activity [GO:0004519]; nucleic acid binding [GO:0003676]; DNA catabolic process [GO:0006308]	PF02265;	SIGNAL 1 20 {ECO:0000256|SAM:SignalP}.	1 out of 5	NULL	KID70073;	NULL
MAN_01396	2177.71	2.2022	0.0934815	23.5576	1.0484e-122	1.91324e-121	3789.13	3606.58	3387.18	3528.02	895.385	807.71	705.558	702.108	KID71797.1	287	iron sulfur assembly protein 1, partial	MAN_01396	A0A0B4FVP8	A0A0B4FVP8_METAN	unreviewed	Iron sulfur assembly protein 1 (Fragment)	Metarhizium anisopliae ARSEF 549	287	GO:0005198; GO:0051536; GO:0097428	iron-sulfur cluster binding [GO:0051536]; structural molecule activity [GO:0005198]; protein maturation by iron-sulfur cluster transfer [GO:0097428]	PF01521;	NULL	1 out of 5	NULL	KID71797;	K22063
MAN_00549	1387.2	2.04624	0.0869756	23.5266	2.17953e-122	3.97033e-121	2111.53	2233.09	2287.92	2302.17	613.978	543.486	511.58	493.847	KID70950.1	407	FAD dependent oxidoreductase, partial	MAN_00549	A0A0B4FA15	A0A0B4FA15_METAN	unreviewed	FAD dependent oxidoreductase (Fragment)	Metarhizium anisopliae ARSEF 549	407	GO:0016491	oxidoreductase activity [GO:0016491]	PF01266;	NULL	1 out of 5	NULL	KID70950;	NULL
MAN_06382	478.794	-5.55642	0.236425	-23.5019	3.9047e-122	7.10028e-121	15.1666	14.0919	17.6284	32.1678	1064.23	706.746	967.881	1012.44	KID64208.1	533	cytochrome P450 oxidoreductase OrdA-like protein, partial	MAN_06382	A0A0B4F194	A0A0B4F194_METAN	unreviewed	Cytochrome P450 oxidoreductase OrdA-like protein (Fragment)	Metarhizium anisopliae ARSEF 549	533	GO:0004497; GO:0005506; GO:0016705; GO:0020037	heme binding [GO:0020037]; iron ion binding [GO:0005506]; monooxygenase activity [GO:0004497]; oxidoreductase activity, acting on paired donors, with incorporation or reduction of molecular oxygen [GO:0016705]	PF00067;	NULL	1 out of 5	NULL	KID64208;	NULL
MAN_09171	864.208	1.98448	0.0844892	23.488	5.4145e-122	9.82815e-121	1403.76	1339.67	1401.46	1373.65	357.131	383.447	324.637	329.919	KID61406.1	443	MFS monocarboxylate transporter, partial	MAN_09171	A0A0B4F6B6	A0A0B4F6B6_METAN	unreviewed	MFS monocarboxylate transporter (Fragment)	Metarhizium anisopliae ARSEF 549	443	GO:0016021; GO:0055085	integral component of membrane [GO:0016021]; transmembrane transport [GO:0055085]	PF07690;	NULL	1 out of 5	NULL	KID61406;	K02835
MAN_01126	4279.29	3.28193	0.139921	23.4557	1.15723e-121	2.09682e-120	7755.21	7712.01	7934.05	7642.01	1075.49	668.079	801.04	646.435	KID71527.1	314	F-box domain-containing protein, partial	MAN_01126	A0A0B4FUY3	A0A0B4FUY3_METAN	unreviewed	F-box domain-containing protein (Fragment)	Metarhizium anisopliae ARSEF 549	314	NULL	NULL	NULL	NULL	1 out of 5	NULL	KID71527;	NULL
MAN_03527	565.913	-2.85625	0.121803	-23.4497	1.32992e-121	2.40543e-120	144.926	145.616	108.289	146.928	1055.02	975.267	1055.32	895.936	KID68671.1	392	integral membrane protein, partial	MAN_03527	A0A0B4FSG2	A0A0B4FSG2_METAN	unreviewed	Integral membrane protein (Fragment)	Metarhizium anisopliae ARSEF 549	392	GO:0016021	integral component of membrane [GO:0016021]	NULL	NULL	1 out of 5	NULL	KID68671;	NULL
MAN_07329	679.896	2.54133	0.108579	23.4054	3.76331e-121	6.79465e-120	1184.68	1225.05	1038.82	1192.82	184.194	184.742	201.014	227.85	KID63128.1	383	DEHA2B11506p-like protein, partial	MAN_07329	A0A0B4EYF7	A0A0B4EYF7_METAN	unreviewed	DEHA2B11506p-like protein (Fragment)	Metarhizium anisopliae ARSEF 549	383	GO:0016021	integral component of membrane [GO:0016021]	PF04172;	NULL	1 out of 5	NULL	KID63128;	NULL
MAN_09419	5539.41	1.7905	0.0765121	23.4015	4.12855e-121	7.44089e-120	8763.79	8295.41	8763.84	8554.88	2733.23	2335.06	2252.36	2616.67	KID61135.1	406	nitrilase, partial	MAN_09419	A0A0B4EG68	A0A0B4EG68_METAN	unreviewed	Nitrilase (Fragment)	Metarhizium anisopliae ARSEF 549	406	GO:0006807; GO:0016810	hydrolase activity, acting on carbon-nitrogen (but not peptide) bonds [GO:0016810]; nitrogen compound metabolic process [GO:0006807]	PF00795;	NULL	1 out of 5	NULL	KID61135;	K01501
MAN_00051	3474.92	-2.2633	0.096729	-23.3984	4.43924e-121	7.98671e-120	1261.36	1130.17	1118.15	1279.75	4883.18	6252.23	5732.91	6141.64	KID70452.1	367	hypothetical protein MAN_00051, partial	MAN_00051	A0A0B4FRV3	A0A0B4FRV3_METAN	unreviewed	Uncharacterized protein (Fragment)	Metarhizium anisopliae ARSEF 549	367	GO:0016021	integral component of membrane [GO:0016021]	NULL	NULL	1 out of 5	NULL	KID70452;	NULL
MAN_09389	82765.2	11.4526	0.489638	23.39	5.4045e-121	9.70617e-120	161051	160816	177861	162157	38.8853	119.223	43.218	35.0539	KID61105.1	273	methyltransferase SirN-like protein, partial	MAN_09389	A0A0B4EG45	A0A0B4EG45_METAN	unreviewed	Methyltransferase SirN-like protein (Fragment)	Metarhizium anisopliae ARSEF 549	273	GO:0008168	methyltransferase activity [GO:0008168]	NULL	NULL	1 out of 5	NULL	KID61105;	NULL
MAN_07837	1048.2	4.7723	0.204043	23.3887	5.57088e-121	9.98737e-120	2065.19	2180.48	1949.2	1895.29	62.4211	54.7782	123.623	54.6428	KID62621.1	513	cytochrome P450, partial	MAN_07837	A0A0B4F9Z8	A0A0B4F9Z8_METAN	unreviewed	Cytochrome P450 (Fragment)	Metarhizium anisopliae ARSEF 549	513	GO:0004497; GO:0005506; GO:0016705; GO:0020037	heme binding [GO:0020037]; iron ion binding [GO:0005506]; monooxygenase activity [GO:0004497]; oxidoreductase activity, acting on paired donors, with incorporation or reduction of molecular oxygen [GO:0016705]	PF00067;	NULL	1 out of 5	NULL	KID62621;	NULL
MAN_05724	11909.9	1.66642	0.0712643	23.3836	6.27098e-121	1.12227e-119	17967.4	18272.5	18628.2	17586.2	5102.16	5866.64	6214.34	5641.61	KID66065.1	804	Glycosyl transferase, family 2, partial	MAN_05724	A0A0B4EVY5	A0A0B4EVY5_METAN	unreviewed	Glycosyl transferase, family 2 (Fragment)	Metarhizium anisopliae ARSEF 549	804	GO:0016021; GO:0016740	integral component of membrane [GO:0016021]; transferase activity [GO:0016740]	PF13632;	NULL	1 out of 5	NULL	KID66065;	NULL
MAN_03861	4586.35	1.52509	0.065233	23.3792	6.95943e-121	1.2433e-119	6536.82	7003.66	6768.06	6920.41	2430.33	2542.35	2229.24	2259.94	KID67103.1	1412	regulator of deoxyribodipyrimidine photo-lyase PHR1, partial	MAN_03861	A0A0B4F986	A0A0B4F986_METAN	unreviewed	Regulator of deoxyribodipyrimidine photo-lyase PHR1 (Fragment)	Metarhizium anisopliae ARSEF 549	1412	GO:0005634; GO:0016829; GO:0046872	nucleus [GO:0005634]; lyase activity [GO:0016829]; metal ion binding [GO:0046872]	PF02373;PF02375;	NULL	1 out of 5	NULL	KID67103;	NULL
MAN_01044	876.978	2.92566	0.125171	23.3733	7.99431e-121	1.42568e-119	1615.25	1746.45	1278.06	1559.7	234.335	192.261	197.999	191.765	KID71445.1	177	NLP/P60 protein, partial	MAN_01044	A0A0B4FBF5	A0A0B4FBF5_METAN	unreviewed	NLP/P60 protein (Fragment)	Metarhizium anisopliae ARSEF 549	177	NULL	NULL	NULL	SIGNAL 1 19 {ECO:0000256|SAM:SignalP}.	1 out of 5	NULL	KID71445;	NULL
MAN_04214	6114.39	2.12675	0.0910167	23.3665	9.358e-121	1.66595e-119	9968.7	10093.5	9820.29	9918.1	2213.39	2695.95	2208.14	1997.04	KID67456.1	429	helix-loop-helix DNA-binding domain-containing protein, partial	MAN_04214	A0A0B4FP27	A0A0B4FP27_METAN	unreviewed	Helix-loop-helix DNA-binding domain-containing protein (Fragment)	Metarhizium anisopliae ARSEF 549	429	GO:0003677; GO:0046983	DNA binding [GO:0003677]; protein dimerization activity [GO:0046983]	PF00010;	NULL	1 out of 5	NULL	KID67456;	NULL
MAN_01310	2655.13	1.65421	0.070817	23.359	1.11707e-120	1.98519e-119	3836.32	3895.93	4312.67	4075.74	1190.09	1338.31	1276.44	1315.55	KID71711.1	381	Adenylosuccinate synthetase, partial	MAN_01310	A0A0B4G1A2	A0A0B4G1A2_METAN	unreviewed	Adenylosuccinate synthetase (Fragment)	Metarhizium anisopliae ARSEF 549	381	GO:0004019; GO:0005525; GO:0006164	adenylosuccinate synthase activity [GO:0004019]; GTP binding [GO:0005525]; purine nucleotide biosynthetic process [GO:0006164]	PF00709;	NULL	1 out of 5	NULL	KID71711;	K01939
MAN_00194	6799.75	2.27796	0.0976202	23.3349	1.96014e-120	3.47737e-119	11765.1	12028.8	10271.1	11033.5	2736.3	2289.94	2208.14	2065.09	KID70595.1	733	Flavocytochrome c, partial	MAN_00194	A0A0B4F942	A0A0B4F942_METAN	unreviewed	Flavocytochrome c (Fragment)	Metarhizium anisopliae ARSEF 549	733	GO:0000104	succinate dehydrogenase activity [GO:0000104]	PF00173;PF00890;	NULL	1 out of 5	NULL	KID70595;	NULL
MAN_05653	2587.85	3.99533	0.171247	23.3308	2.15787e-120	3.82149e-119	4954.44	5088.1	4878.04	4560	348.944	415.67	205.034	252.594	KID65994.1	150	hypothetical protein MAN_05653, partial	MAN_05653	A0A0B4GCH3	A0A0B4GCH3_METAN	unreviewed	Uncharacterized protein (Fragment)	Metarhizium anisopliae ARSEF 549	150	NULL	NULL	NULL	SIGNAL 1 19 {ECO:0000256|SAM:SignalP}.	1 out of 5	NULL	KID65994;	NULL
MAN_01411	693.346	-3.59271	0.154041	-23.3231	2.58733e-120	4.57409e-119	96.898	104.28	107.03	116.499	964.97	1350.12	1495.54	1311.43	KID71812.1	985	proteinrelated to gastric mucin, partial	MAN_01411	A0A0B4FVR4	A0A0B4FVR4_METAN	unreviewed	Proteinrelated to gastric mucin (Fragment)	Metarhizium anisopliae ARSEF 549	985	NULL	NULL	NULL	NULL	1 out of 5	NULL	KID71812;	NULL
MAN_04773	1877.27	-3.66178	0.157057	-23.3149	3.12849e-120	5.52121e-119	275.527	236.743	269.463	317.331	2536.75	3812.99	3286.57	4282.76	KID66492.1	226	hypothetical protein MAN_04773, partial	MAN_04773	A0A0B4FF45	A0A0B4FF45_METAN	unreviewed	Uncharacterized protein (Fragment)	Metarhizium anisopliae ARSEF 549	226	NULL	NULL	NULL	NULL	1 out of 5	NULL	KID66492;	NULL
MAN_06740	1001.98	3.62543	0.155649	23.2923	5.30749e-120	9.35056e-119	1782.08	1806.58	1949.2	1877.03	105.4	155.742	134.679	205.168	KID64566.1	1222	GTPase activating protein Rga6, partial	MAN_06740	A0A0B4FFI5	A0A0B4FFI5_METAN	unreviewed	GTPase activating protein Rga6 (Fragment)	Metarhizium anisopliae ARSEF 549	1222	GO:0007165	signal transduction [GO:0007165]	PF00620;	NULL	1 out of 5	NULL	KID64566;	NULL
MAN_05376	1218.27	1.77565	0.0762659	23.2824	6.68698e-120	1.17605e-118	1912.68	1842.28	1866.09	1922.24	586.349	525.226	580.93	510.343	KID65717.1	367	Methyltransferase type 11, partial	MAN_05376	A0A0B4FD21	A0A0B4FD21_METAN	unreviewed	Methyltransferase type 11 (Fragment)	Metarhizium anisopliae ARSEF 549	367	GO:0008168	methyltransferase activity [GO:0008168]	NULL	NULL	1 out of 5	NULL	KID65717;	NULL
MAN_09238	4497.06	-1.59352	0.0684618	-23.276	7.76194e-120	1.36276e-118	2243.82	2263.15	2224.96	2222.18	6257.46	6511.09	7383.23	6870.56	KID61473.1	509	DUF895 domain membrane protein, partial	MAN_09238	A0A0B4ETR4	A0A0B4ETR4_METAN	unreviewed	DUF895 domain membrane protein (Fragment)	Metarhizium anisopliae ARSEF 549	509	GO:0016021; GO:0055085	integral component of membrane [GO:0016021]; transmembrane transport [GO:0055085]	PF07690;	NULL	1 out of 5	NULL	KID61473;	NULL
MAN_02684	411.015	2.82042	0.12129	23.2536	1.30924e-119	2.29466e-118	730.527	679.228	700.1	770.287	95.1667	98.8156	97.4917	116.503	KID70170.1	225	Glutamine amidotransferase subunit PdxT, partial	MAN_02684	A0A0B4F7V7	A0A0B4F7V7_METAN	unreviewed	Glutamine amidotransferase subunit PdxT (Fragment)	Metarhizium anisopliae ARSEF 549	225	GO:0004359; GO:0006541; GO:0016740; GO:0042823	glutaminase activity [GO:0004359]; transferase activity [GO:0016740]; glutamine metabolic process [GO:0006541]; pyridoxal phosphate biosynthetic process [GO:0042823]	PF01174;	NULL	1 out of 5	NULL	KID70170;	K08681
MAN_08472	3695.25	-1.32493	0.0570163	-23.2377	1.89238e-119	3.31102e-118	2137.65	2021.71	2213.63	2063.95	5263.84	5482.12	5192.19	5186.94	KID62468.1	770	Glycoside hydrolase, superfamily, partial	MAN_08472	A0A0B4EWQ6	A0A0B4EWQ6_METAN	unreviewed	Glycoside hydrolase, superfamily (Fragment)	Metarhizium anisopliae ARSEF 549	770	GO:0004553; GO:0005975	hydrolase activity, hydrolyzing O-glycosyl compounds [GO:0004553]; carbohydrate metabolic process [GO:0005975]	PF00150;	NULL	1 out of 5	NULL	KID62468;	NULL
MAN_06193	2994.7	2.83919	0.122207	23.2326	2.13486e-119	3.72886e-118	5468.42	5037.37	5522.73	4992.09	951.667	665.931	649.274	670.147	KID65182.1	276	dienelactone hydrolase family protein, partial	MAN_06193	A0A0B4FBU8	A0A0B4FBU8_METAN	unreviewed	Dienelactone hydrolase family protein (Fragment)	Metarhizium anisopliae ARSEF 549	276	GO:0016787	hydrolase activity [GO:0016787]	PF01738;	NULL	1 out of 5	NULL	KID65182;	NULL
MAN_02585	758.635	3.27251	0.141066	23.1984	4.73003e-119	8.24758e-118	1411.34	1213.78	1662.11	1212.81	153.495	157.89	123.623	134.029	KID70071.1	180	hypothetical protein MAN_02585, partial	MAN_02585	A0A0B4FWM8	A0A0B4FWM8_METAN	unreviewed	Uncharacterized protein (Fragment)	Metarhizium anisopliae ARSEF 549	180	NULL	NULL	NULL	NULL	1 out of 5	NULL	KID70071;	NULL
MAN_07514	1077.43	-1.96973	0.0849232	-23.1943	5.19766e-119	9.04749e-118	429.722	406.785	483.522	436.438	1804.07	1600.38	1698.57	1759.91	KID63313.1	268	Small GTPase superfamily, Rho type, partial	MAN_07514	A0A0B4EYX3	A0A0B4EYX3_METAN	unreviewed	Small GTPase superfamily, Rho type (Fragment)	Metarhizium anisopliae ARSEF 549	268	GO:0003924; GO:0005525; GO:0005622; GO:0007264	intracellular [GO:0005622]; GTP binding [GO:0005525]; GTPase activity [GO:0003924]; small GTPase mediated signal transduction [GO:0007264]	PF00071;	NULL	1 out of 5	NULL	KID63313;	NULL
MAN_03027	7196.89	-2.0961	0.090459	-23.1718	8.76186e-119	1.52256e-117	2562.32	2559.08	2844.47	2949	10423.3	12645.2	10931.1	12660.6	KID68171.1	9393	Amino acid adenylation, partial	MAN_03027	A0A0B4FQY6	A0A0B4FQY6_METAN	unreviewed	Amino acid adenylation (Fragment)	Metarhizium anisopliae ARSEF 549	9393	GO:0003824; GO:0008152; GO:0031177	catalytic activity [GO:0003824]; phosphopantetheine binding [GO:0031177]; metabolic process [GO:0008152]	PF00501;PF00668;PF00550;	NULL	1 out of 5	NULL	KID68171;	NULL
MAN_03529	1381.84	1.83253	0.0792711	23.1172	3.10557e-118	5.38739e-117	2141.02	2137.27	2125.48	2226.53	556.674	664.857	570.879	632.001	KID68673.1	460	UDP-glucuronosyl/UDP-glucosyltransferase, partial	MAN_03529	A0A0B4FDW9	A0A0B4FDW9_METAN	unreviewed	UDP-glucuronosyl/UDP-glucosyltransferase (Fragment)	Metarhizium anisopliae ARSEF 549	460	GO:0008152; GO:0016758	transferase activity, transferring hexosyl groups [GO:0016758]; metabolic process [GO:0008152]	PF00201;	NULL	1 out of 5	NULL	KID68673;	NULL
MAN_04425	6006.12	-1.76706	0.0764826	-23.104	4.21885e-118	7.30621e-117	2673.54	2749.79	2687.08	2800.33	8140.33	9354.18	10025.6	9618.16	KID67667.1	876	Src-like protein, partial	MAN_04425	A0A0B4FII0	A0A0B4FII0_METAN	unreviewed	Src-like protein (Fragment)	Metarhizium anisopliae ARSEF 549	876	NULL	NULL	PF00611;PF00018;	NULL	1 out of 5	NULL	KID67667;	NULL
MAN_02974	2245.69	-1.73136	0.0749461	-23.1014	4.47917e-118	7.74386e-117	1011.11	1100.11	1043.85	1004.16	3792.34	3287.77	3319.74	3406.41	KID68118.1	805	hypothetical protein MAN_02974, partial	MAN_02974	A0A0B4FCA5	A0A0B4FCA5_METAN	unreviewed	Uncharacterized protein (Fragment)	Metarhizium anisopliae ARSEF 549	805	NULL	NULL	NULL	NULL	1 out of 5	NULL	KID68118;	NULL
MAN_01234	297.43	-3.93408	0.170538	-23.0686	9.56526e-118	1.6509e-116	42.9722	37.5783	39.0344	26.9514	568.953	617.597	523.641	522.715	KID71635.1	214	hypothetical protein MAN_01234, partial	MAN_01234	A0A0B4FC93	A0A0B4FC93_METAN	unreviewed	Uncharacterized protein (Fragment)	Metarhizium anisopliae ARSEF 549	214	NULL	NULL	NULL	SIGNAL 1 25 {ECO:0000256|SAM:SignalP}.	1 out of 5	NULL	KID71635;	NULL
MAN_06457	766.079	-3.03483	0.131613	-23.0588	1.20055e-117	2.06856e-116	166.833	175.679	156.137	166.925	1181.91	1413.49	1221.16	1646.5	KID64283.1	825	secreted aspartic proteinase, partial	MAN_06457	A0A0B4F1G1	A0A0B4F1G1_METAN	unreviewed	Secreted aspartic proteinase (Fragment)	Metarhizium anisopliae ARSEF 549	825	GO:0004190	aspartic-type endopeptidase activity [GO:0004190]	PF00026;	SIGNAL 1 17 {ECO:0000256|SAM:SignalP}.	1 out of 5	NULL	KID64283;	NULL
MAN_03645	16924.7	1.79329	0.0778176	23.0448	1.65695e-117	2.85013e-116	27573	27932.9	24760.4	24814.4	7746.36	7047.05	8315.94	7207.69	KID68789.1	335	malate dehydrogenase, partial	MAN_03645	A0A0B4GKG4	A0A0B4GKG4_METAN	unreviewed	Malate dehydrogenase (EC 1.1.1.37) (Fragment)	Metarhizium anisopliae ARSEF 549	335	GO:0005975; GO:0006099; GO:0006108; GO:0030060	L-malate dehydrogenase activity [GO:0030060]; carbohydrate metabolic process [GO:0005975]; malate metabolic process [GO:0006108]; tricarboxylic acid cycle [GO:0006099]	PF02866;PF00056;	NULL	2 out of 5	NULL	KID68789;	K00026
MAN_01382	3189.87	-3.13422	0.136163	-23.0182	3.06412e-117	5.26171e-116	576.332	614.405	742.912	678.131	4566.98	6289.83	5152.99	6897.36	KID71783.1	701	plasma membrane fusion protein PRM1, partial	MAN_01382	A0A0B4FMZ0	A0A0B4FMZ0_METAN	unreviewed	Plasma membrane fusion protein PRM1 (Fragment)	Metarhizium anisopliae ARSEF 549	701	GO:0016021; GO:0032220; GO:0043332	integral component of membrane [GO:0016021]; mating projection tip [GO:0043332]; plasma membrane fusion involved in cytogamy [GO:0032220]	NULL	NULL	1 out of 5	NULL	KID71783;	NULL
MAN_07152	609.306	-2.60662	0.113251	-23.0163	3.19849e-117	5.48321e-116	184.527	176.618	149.842	173.88	1165.54	940.896	1058.34	1024.81	KID63981.1	235	hypothetical protein MAN_07152, partial	MAN_07152	A0A0B4FDM1	A0A0B4FDM1_METAN	unreviewed	Uncharacterized protein (Fragment)	Metarhizium anisopliae ARSEF 549	235	NULL	NULL	NULL	NULL	1 out of 5	NULL	KID63981;	NULL
MAN_04073	466.506	-2.87625	0.125227	-22.9682	9.68702e-117	1.65786e-115	96.898	100.522	124.658	126.932	765.427	887.192	823.151	807.27	KID67315.1	454	O-methyltransferase, family 2, partial	MAN_04073	A0A0B4EZG7	A0A0B4EZG7_METAN	unreviewed	O-methyltransferase, family 2 (Fragment)	Metarhizium anisopliae ARSEF 549	454	GO:0008171	O-methyltransferase activity [GO:0008171]	PF00891;	NULL	1 out of 5	NULL	KID67315;	NULL
MAN_10384	2200.76	-2.16229	0.0941548	-22.9652	1.03762e-116	1.77284e-115	824.054	827.662	702.619	856.358	3773.92	3825.88	3145.87	3649.73	KID59743.1	393	hypothetical protein MAN_10384, partial	MAN_10384	A0A0B4ENB5	A0A0B4ENB5_METAN	unreviewed	Uncharacterized protein (Fragment)	Metarhizium anisopliae ARSEF 549	393	NULL	NULL	NULL	NULL	1 out of 5	NULL	KID59743;	NULL
MAN_08849	820.543	3.50892	0.160353	21.8825	3.81759e-106	5.75067e-105	1445.04	1404.49	1576.48	1607.52	123.819	190.113	105.532	111.348	KID61610.1	352	Alcohol dehydrogenase superfamily, zinc-type, partial	MAN_08849	A0A0B4EHL5	A0A0B4EHL5_METAN	unreviewed	Alcohol dehydrogenase superfamily, zinc-type (Fragment)	Metarhizium anisopliae ARSEF 549	352	GO:0016491	oxidoreductase activity [GO:0016491]	PF08240;PF00107;	NULL	1 out of 5	NULL	KID61610;	NULL
MAN_05372	367.589	-3.48049	0.1517	-22.9433	1.71763e-116	2.92485e-115	68.2499	54.4886	66.7362	53.0333	672.306	774.413	605.051	646.435	KID65713.1	403	Homeobox domain containing protein, partial	MAN_05372	A0A0B4F5G3	A0A0B4F5G3_METAN	unreviewed	Homeobox domain containing protein (Fragment)	Metarhizium anisopliae ARSEF 549	403	GO:0003677; GO:0005634	nucleus [GO:0005634]; DNA binding [GO:0003677]	PF00046;	NULL	1 out of 5	NULL	KID65713;	NULL
MAN_04233	567.926	2.39719	0.104492	22.9413	1.80017e-116	3.06029e-115	899.045	919.729	1002.3	998.07	167.821	174.001	202.019	180.424	KID67475.1	224	GNAT family acetyltransferase, partial	MAN_04233	A0A0B4EZT5	A0A0B4EZT5_METAN	unreviewed	GNAT family acetyltransferase (Fragment)	Metarhizium anisopliae ARSEF 549	224	GO:0008080	N-acetyltransferase activity [GO:0008080]	PF13673;	NULL	1 out of 5	NULL	KID67475;	NULL
MAN_05324	489.356	-6.60395	0.288025	-22.9284	2.42023e-116	4.10753e-115	6.74073	6.57621	7.55504	18.2574	701.982	1086.97	998.033	1088.73	KID65665.1	525	MATE efflux family protein, partial	MAN_05324	A0A0B4EUQ0	A0A0B4EUQ0_METAN	unreviewed	MATE efflux family protein (Fragment)	Metarhizium anisopliae ARSEF 549	525	GO:0015238; GO:0015297; GO:0016021	integral component of membrane [GO:0016021]; antiporter activity [GO:0015297]; drug transmembrane transporter activity [GO:0015238]	PF01554;	NULL	1 out of 5	NULL	KID65665;	K03327
MAN_02763	698.291	2.0571	0.089817	22.9033	4.30998e-116	7.30258e-115	1147.61	1127.35	1149.62	1079.79	246.615	263.15	280.414	291.772	KID67907.1	323	HPP family protein, partial	MAN_02763	A0A0B4FJ53	A0A0B4FJ53_METAN	unreviewed	HPP family protein (Fragment)	Metarhizium anisopliae ARSEF 549	323	GO:0016021	integral component of membrane [GO:0016021]	PF04982;	NULL	1 out of 5	NULL	KID67907;	NULL
MAN_10403	346.273	-3.3022	0.144249	-22.8924	5.53303e-116	9.35928e-115	69.9351	53.5491	76.8096	56.5109	575.093	657.338	622.138	658.807	KID59762.1	862	phosphoribosylaminoimidazole-succinocarboxamide synthase, partial	MAN_10403	A0A0B4EVJ0	A0A0B4EVJ0_METAN	unreviewed	Phosphoribosylaminoimidazole-succinocarboxamide synthase (Fragment)	Metarhizium anisopliae ARSEF 549	862	GO:0016021	integral component of membrane [GO:0016021]	PF11915;	NULL	1 out of 5	NULL	KID59762;	NULL
MAN_10393	1219.93	2.61775	0.114356	22.8913	5.67408e-116	9.58195e-115	2200.01	2060.23	2028.53	2103.94	410.342	272.817	357.804	325.795	KID59752.1	678	urea active transporter, partial	MAN_10393	A0A0B4EVI1	A0A0B4EVI1_METAN	unreviewed	Urea active transporter (Fragment)	Metarhizium anisopliae ARSEF 549	678	GO:0015204; GO:0016021	integral component of membrane [GO:0016021]; urea transmembrane transporter activity [GO:0015204]	PF00474;	NULL	1 out of 5	NULL	KID59752;	K20989
MAN_05949	850.96	-4.97854	0.218108	-22.826	2.53081e-115	4.26676e-114	33.7036	43.2151	50.3669	81.7235	1994.41	1703.49	1296.54	1604.23	KID64938.1	134	Calcium Channel Inhibitor, partial	MAN_05949	A0A0B4F357	A0A0B4F357_METAN	unreviewed	Calcium Channel Inhibitor (Fragment)	Metarhizium anisopliae ARSEF 549	134	GO:0005576; GO:0009405	extracellular region [GO:0005576]; pathogenesis [GO:0009405]	PF09044;	SIGNAL 1 16 {ECO:0000256|SAM:SignalP}.	1 out of 5	NULL	KID64938;	NULL
MAN_08228	3163.72	2.63772	0.115559	22.8259	2.53845e-115	4.27256e-114	6091.09	5819	4920.85	4974.7	1025.34	801.265	755.812	921.711	KID62224.1	121	thioredoxin M-type, partial	MAN_08228	A0A0B4G194	A0A0B4G194_METAN	unreviewed	Thioredoxin M-type (Fragment)	Metarhizium anisopliae ARSEF 549	121	GO:0005623; GO:0006662; GO:0015035; GO:0045454	cell [GO:0005623]; protein disulfide oxidoreductase activity [GO:0015035]; cell redox homeostasis [GO:0045454]; glycerol ether metabolic process [GO:0006662]	PF00085;	NULL	1 out of 5	NULL	KID62224;	K03671
MAN_02950	1115.31	-2.83708	0.124309	-22.8227	2.72797e-115	4.58398e-114	226.657	252.714	292.128	325.155	2122.32	1936.57	2052.35	1714.55	KID68094.1	425	aspartic proteinase, partial	MAN_02950	A0A0B4GIE9	A0A0B4GIE9_METAN	unreviewed	Aspartic proteinase (Fragment)	Metarhizium anisopliae ARSEF 549	425	GO:0004190	aspartic-type endopeptidase activity [GO:0004190]	PF00026;	SIGNAL 1 16 {ECO:0000256|SAM:SignalP}.	1 out of 5	NULL	KID68094;	NULL
MAN_08064	1951.79	2.01148	0.0881603	22.8162	3.17005e-115	5.31806e-114	2913.68	2881.32	3417.4	3299.37	755.194	845.303	762.847	739.224	KID62848.1	316	thioesterase family protein, partial	MAN_08064	A0A0B4EXM0	A0A0B4EXM0_METAN	unreviewed	Thioesterase family protein (Fragment)	Metarhizium anisopliae ARSEF 549	316	GO:0016021	integral component of membrane [GO:0016021]	PF03061;	NULL	1 out of 5	NULL	KID62848;	NULL
MAN_00790	10974.7	1.33278	0.0584703	22.7942	5.23858e-115	8.77376e-114	15968.8	15579	15557.1	15742.2	6436.54	6144.83	6591.24	5777.7	KID71191.1	233	Rieske	MAN_00790	A0A0B4FZQ5	A0A0B4FZQ5_METAN	unreviewed	Cytochrome b-c1 complex subunit Rieske, mitochondrial (EC 1.10.2.2) (Fragment)	Metarhizium anisopliae ARSEF 549	233	GO:0005743; GO:0008121; GO:0051537; GO:0070469	mitochondrial inner membrane [GO:0005743]; respiratory chain [GO:0070469]; 2 iron, 2 sulfur cluster binding [GO:0051537]; ubiquinol-cytochrome-c reductase activity [GO:0008121]	PF00355;PF02921;	NULL	2 out of 5	NULL	KID71191;	K00411
MAN_04553	2106.99	-2.80395	0.1231	-22.7778	7.62044e-115	1.2742e-113	529.147	551.462	459.598	568.587	3341.07	3170.69	3726.79	4508.55	KID66272.1	351	2-nitropropane dioxygenase, partial	MAN_04553	A0A0B4FEH3	A0A0B4FEH3_METAN	unreviewed	2-nitropropane dioxygenase (Fragment)	Metarhizium anisopliae ARSEF 549	351	GO:0018580; GO:0051213	dioxygenase activity [GO:0051213]; nitronate monooxygenase activity [GO:0018580]	PF03060;	NULL	1 out of 5	NULL	KID66272;	NULL
MAN_04493	2648.71	-2.25356	0.0989678	-22.7706	8.96759e-115	1.497e-113	958.869	880.272	837.35	993.723	4964.02	3892.47	4096.66	4566.28	KID67735.1	435	Methionine synthase, vitamin-B12 independent, partial	MAN_04493	A0A0B4F0K5	A0A0B4F0K5_METAN	unreviewed	Methionine synthase, vitamin-B12 independent (Fragment)	Metarhizium anisopliae ARSEF 549	435	GO:0003871; GO:0008270; GO:0009086	5-methyltetrahydropteroyltriglutamate-homocysteine S-methyltransferase activity [GO:0003871]; zinc ion binding [GO:0008270]; methionine biosynthetic process [GO:0009086]	PF01717;	NULL	1 out of 5	NULL	KID67735;	NULL
MAN_05639	1132.19	2.30683	0.101316	22.7685	9.40329e-115	1.56716e-113	1981.77	1841.34	1975.64	1736.19	355.084	365.188	353.784	448.483	KID65980.1	277	Alpha/beta hydrolase fold-1, partial	MAN_05639	A0A0B4EVL0	A0A0B4EVL0_METAN	unreviewed	Alpha/beta hydrolase fold-1 (Fragment)	Metarhizium anisopliae ARSEF 549	277	GO:0016787	hydrolase activity [GO:0016787]	PF00561;	NULL	1 out of 5	NULL	KID65980;	NULL
MAN_06148	777.156	2.9109	0.127955	22.7493	1.45791e-114	2.4258e-113	1339.72	1281.42	1516.04	1351.05	145.308	174.001	224.13	185.579	KID65137.1	498	Aldehyde/histidinol dehydrogenase, partial	MAN_06148	A0A0B4FBS1	A0A0B4FBS1_METAN	unreviewed	Aldehyde/histidinol dehydrogenase (Fragment)	Metarhizium anisopliae ARSEF 549	498	GO:0016491	oxidoreductase activity [GO:0016491]	PF00171;	NULL	1 out of 5	NULL	KID65137;	NULL
MAN_02451	7026.81	-6.0011	0.263973	-22.7337	2.07816e-114	3.45219e-113	160.935	174.739	185.098	342.543	12235.6	15603.2	13976.5	13535.9	KID69937.1	822	peptidylarginine deiminase-like enzyme, partial	MAN_02451	A0A0B4FQ95	A0A0B4FQ95_METAN	unreviewed	Peptidylarginine deiminase-like enzyme (Fragment)	Metarhizium anisopliae ARSEF 549	822	GO:0004668; GO:0009446	protein-arginine deiminase activity [GO:0004668]; putrescine biosynthetic process [GO:0009446]	PF04371;	NULL	1 out of 5	NULL	KID69937;	NULL
MAN_08964	474.706	-4.51058	0.198491	-22.7244	2.57276e-114	4.26685e-113	27.8055	50.7307	37.7752	43.4699	726.541	1034.34	817.121	1059.86	KID61725.1	356	UbiD family decarboxylase, partial	MAN_08964	A0A0B4EHW7	A0A0B4EHW7_METAN	unreviewed	UbiD family decarboxylase (Fragment)	Metarhizium anisopliae ARSEF 549	356	GO:0016021	integral component of membrane [GO:0016021]	NULL	NULL	1 out of 5	NULL	KID61725;	NULL
MAN_07630	4022.21	2.00785	0.0883885	22.7162	3.09724e-114	5.12833e-113	6456.78	6293.43	6581.7	6438.77	1880.82	1508.01	1580.97	1437.21	KID63429.1	745	plasma membrane channel protein (Aqy1), partial	MAN_07630	A0A0B4G4R8	A0A0B4G4R8_METAN	unreviewed	Plasma membrane channel protein (Aqy1) (Fragment)	Metarhizium anisopliae ARSEF 549	745	GO:0016021	integral component of membrane [GO:0016021]	PF04547;	NULL	1 out of 5	NULL	KID63429;	K19327
MAN_01517	68939.1	1.41078	0.0621752	22.6903	5.58333e-114	9.22971e-113	102305	100695	100943	96835.4	37360.6	36812	41173.6	35388.9	KID71918.1	315	Mitochondrial substrate/solute carrier, partial	MAN_01517	A0A0B4FNF0	A0A0B4FNF0_METAN	unreviewed	Mitochondrial substrate/solute carrier (Fragment)	Metarhizium anisopliae ARSEF 549	315	GO:0005215; GO:0005743; GO:0016021; GO:0055085	integral component of membrane [GO:0016021]; mitochondrial inner membrane [GO:0005743]; transporter activity [GO:0005215]; transmembrane transport [GO:0055085]	PF00153;	NULL	1 out of 5	NULL	KID71918;	K05863
MAN_04744	1713.21	-3.16917	0.139706	-22.6845	6.36924e-114	1.05118e-112	337.036	304.384	352.568	377.319	2429.31	3412.36	2777	3715.71	KID66463.1	401	hypothetical protein MAN_04744, partial	MAN_04744	A0A0B4F7J6	A0A0B4F7J6_METAN	unreviewed	Uncharacterized protein (Fragment)	Metarhizium anisopliae ARSEF 549	401	GO:0016021	integral component of membrane [GO:0016021]	NULL	SIGNAL 1 19 {ECO:0000256|SAM:SignalP}.	1 out of 5	NULL	KID66463;	NULL
MAN_03857	3771.87	2.24546	0.0990256	22.6755	7.81759e-114	1.28813e-112	6257.08	6572.45	5816.12	6273.58	1555.41	1267.42	1128.69	1304.21	KID67099.1	1382	xanthine dehydrogenase, partial	MAN_03857	A0A0B4GFW4	A0A0B4GFW4_METAN	unreviewed	Xanthine dehydrogenase (Fragment)	Metarhizium anisopliae ARSEF 549	1382	GO:0004854; GO:0004855; GO:0005506; GO:0009055; GO:0016614; GO:0050660; GO:0051537	2 iron, 2 sulfur cluster binding [GO:0051537]; electron carrier activity [GO:0009055]; flavin adenine dinucleotide binding [GO:0050660]; iron ion binding [GO:0005506]; oxidoreductase activity, acting on CH-OH group of donors [GO:0016614]; xanthine dehydrogenase activity [GO:0004854]; xanthine oxidase activity [GO:0004855]	PF01315;PF02738;PF03450;PF00941;PF00111;PF01799;	NULL	2 out of 5	NULL	KID67099;	K00106
MAN_04278	2039.21	-2.23912	0.0988574	-22.65	1.39657e-113	2.29745e-112	663.962	692.38	718.988	776.373	3080.13	3398.4	3096.62	3886.86	KID67520.1	600	pheromone-regulated membrane protein, partial	MAN_04278	A0A0B4EZZ3	A0A0B4EZZ3_METAN	unreviewed	Pheromone-regulated membrane protein (Fragment)	Metarhizium anisopliae ARSEF 549	600	GO:0005887; GO:0015079	integral component of plasma membrane [GO:0005887]; potassium ion transmembrane transporter activity [GO:0015079]	PF16944;	NULL	1 out of 5	NULL	KID67520;	NULL
MAN_07358	641.261	2.61966	0.115719	22.6382	1.82439e-113	2.99642e-112	1056.61	1068.16	1222.66	1065.01	167.821	184.742	155.786	209.292	KID63157.1	380	gaba permease, partial	MAN_07358	A0A0B4F5W2	A0A0B4F5W2_METAN	unreviewed	Gaba permease (Fragment)	Metarhizium anisopliae ARSEF 549	380	GO:0015171; GO:0016021	integral component of membrane [GO:0016021]; amino acid transmembrane transporter activity [GO:0015171]	PF13520;	NULL	1 out of 5	NULL	KID63157;	NULL
MAN_05423	3660.16	1.48126	0.0655768	22.5881	5.67307e-113	9.30256e-112	5288.1	5454.49	5500.07	5318.11	2008.73	1791.57	2063.41	1856.82	KID65764.1	478	Crotonase, core, partial	MAN_05423	A0A0B4GBU1	A0A0B4GBU1_METAN	unreviewed	3-hydroxyisobutyryl-CoA hydrolase, mitochondrial (EC 3.1.2.4) (3-hydroxyisobutyryl-coenzyme A hydrolase) (Fragment)	Metarhizium anisopliae ARSEF 549	478	GO:0003860; GO:0005739; GO:0006574	mitochondrion [GO:0005739]; 3-hydroxyisobutyryl-CoA hydrolase activity [GO:0003860]; valine catabolic process [GO:0006574]	PF16113;	NULL	2 out of 5	NULL	KID65764;	K05605
MAN_03477	6176.06	-1.57786	0.0698841	-22.5782	7.0922e-113	1.16109e-111	2951.6	3066.39	3095.05	3284.59	8666.31	9548.59	8837.57	9958.39	KID68621.1	1078	alpha-mannosidase, partial	MAN_03477	A0A0B4FSA9	A0A0B4FSA9_METAN	unreviewed	Alpha-mannosidase (EC 3.2.1.-) (Fragment)	Metarhizium anisopliae ARSEF 549	1078	GO:0004559; GO:0006013; GO:0030246; GO:0046872	alpha-mannosidase activity [GO:0004559]; carbohydrate binding [GO:0030246]; metal ion binding [GO:0046872]; mannose metabolic process [GO:0006013]	PF09261;PF01074;PF07748;	NULL	2 out of 5	NULL	KID68621;	K01191
MAN_08759	882.305	2.52342	0.111764	22.5781	7.10997e-113	1.16213e-111	1545.31	1525.68	1534.93	1406.69	217.962	263.15	250.262	314.454	KID62080.1	483	Ferroporti-1, partial	MAN_08759	A0A0B4EJ09	A0A0B4EJ09_METAN	unreviewed	Ferroporti-1 (Fragment)	Metarhizium anisopliae ARSEF 549	483	GO:0005381; GO:0016021	integral component of membrane [GO:0016021]; iron ion transmembrane transporter activity [GO:0005381]	PF06963;	NULL	1 out of 5	NULL	KID62080;	K14685
MAN_06658	247.198	-4.42823	0.196162	-22.5743	7.75048e-113	1.26479e-111	15.1666	23.4864	21.4059	27.8208	448.204	476.893	455.296	509.312	KID64484.1	1466	Ankyrin repeat-containing domain protein, partial	MAN_06658	A0A0B4G7W1	A0A0B4G7W1_METAN	unreviewed	Ankyrin repeat-containing domain protein (Fragment)	Metarhizium anisopliae ARSEF 549	1466	GO:0003824; GO:0009116	catalytic activity [GO:0003824]; nucleoside metabolic process [GO:0009116]	PF00023;PF12796;	NULL	1 out of 5	NULL	KID64484;	NULL
MAN_06007	2388	1.47472	0.0654342	22.5375	1.78002e-112	2.90016e-111	3483.27	3453.45	3568.5	3544.54	1166.56	1240.57	1336.74	1310.4	KID64996.1	330	Phosphatidylinositol-specific phospholipase, partial	MAN_06007	A0A0B4FGP9	A0A0B4FGP9_METAN	unreviewed	Phosphatidylinositol-specific phospholipase (Fragment)	Metarhizium anisopliae ARSEF 549	330	GO:0006629; GO:0008081	phosphoric diester hydrolase activity [GO:0008081]; lipid metabolic process [GO:0006629]	PF00388;	SIGNAL 1 18 {ECO:0000256|SAM:SignalP}.	1 out of 5	NULL	KID64996;	K01771
MAN_07486	3481.48	-3.28163	0.145641	-22.5324	1.99844e-112	3.25082e-111	606.666	673.591	672.398	645.094	4501.49	6994.42	6013.33	7744.84	KID63285.1	470	CCCH zinc finger DNA binding protein, partial	MAN_07486	A0A0B4EMI6	A0A0B4EMI6_METAN	unreviewed	CCCH zinc finger DNA binding protein (Fragment)	Metarhizium anisopliae ARSEF 549	470	GO:0046872	metal ion binding [GO:0046872]	NULL	NULL	1 out of 5	NULL	KID63285;	NULL
MAN_06752	3522.33	-1.48211	0.0658146	-22.5195	2.67611e-112	4.34622e-111	1881.51	1880.79	1859.8	1805.74	5022.34	5624.97	4886.64	5216.84	KID64578.1	1104	NAD(P) transhydrogenase, partial	MAN_06752	A0A0B4F2B6	A0A0B4F2B6_METAN	unreviewed	NAD(P) transhydrogenase (Fragment)	Metarhizium anisopliae ARSEF 549	1104	GO:0008746; GO:0015992; GO:0016021	integral component of membrane [GO:0016021]; NAD(P)+ transhydrogenase activity [GO:0008746]; proton transport [GO:0015992]	PF01262;PF05222;PF02233;PF12769;	NULL	1 out of 5	NULL	KID64578;	K00323
MAN_06772	855.273	2.67257	0.118704	22.5146	2.98358e-112	4.83786e-111	1568.06	1325.58	1557.6	1464.07	244.568	181.52	250.262	250.532	KID64598.1	475	MOSC, beta barrel, partial	MAN_06772	A0A0B4F2C8	A0A0B4F2C8_METAN	unreviewed	MOSC, beta barrel (Fragment)	Metarhizium anisopliae ARSEF 549	475	GO:0003824; GO:0030151; GO:0030170	catalytic activity [GO:0003824]; molybdenum ion binding [GO:0030151]; pyridoxal phosphate binding [GO:0030170]	PF03473;PF03476;	NULL	1 out of 5	NULL	KID64598;	NULL
MAN_04580	657.151	3.24274	0.144044	22.5121	3.15591e-112	5.10916e-111	1161.09	1051.25	1255.4	1287.58	126.889	95.5933	119.603	159.804	KID66299.1	541	acetylcholinesterase, partial	MAN_04580	A0A0B4GDF6	A0A0B4GDF6_METAN	unreviewed	Carboxylic ester hydrolase (EC 3.1.1.-) (Fragment)	Metarhizium anisopliae ARSEF 549	541	GO:0016787	hydrolase activity [GO:0016787]	PF00135;	NULL	1 out of 5	NULL	KID66299;	NULL
MAN_04131	558.51	-2.80185	0.124476	-22.5091	3.3786e-112	5.46099e-111	137.342	157.829	110.807	151.275	923.014	945.192	950.795	1091.82	KID67373.1	858	hypothetical protein MAN_04131, partial	MAN_04131	A0A0B4F9X3	A0A0B4F9X3_METAN	unreviewed	Uncharacterized protein (Fragment)	Metarhizium anisopliae ARSEF 549	858	NULL	NULL	NULL	NULL	1 out of 5	NULL	KID67373;	NULL
MAN_01243	2218.06	-2.63571	0.117185	-22.4918	4.98899e-112	8.05116e-111	595.712	681.107	531.371	648.571	3397.35	3853.81	3477.54	4559.06	KID71644.1	411	DUF124 domain-containing protein, partial	MAN_01243	A0A0B4GUH1	A0A0B4GUH1_METAN	unreviewed	Altered inheritance of mitochondria protein 24, mitochondrial (Fragment)	Metarhizium anisopliae ARSEF 549	411	GO:0005739	mitochondrion [GO:0005739]	PF01987;	NULL	1 out of 5	NULL	KID71644;	NULL
MAN_00753	1073.26	1.81473	0.0807925	22.4616	9.85352e-112	1.58763e-110	1667.49	1689.15	1594.11	1733.58	442.065	518.782	456.301	484.568	KID71154.1	403	mitochondrial carrier protein, partial	MAN_00753	A0A0B4GSV8	A0A0B4GSV8_METAN	unreviewed	Mitochondrial carrier protein (Fragment)	Metarhizium anisopliae ARSEF 549	403	GO:0006810; GO:0016021	integral component of membrane [GO:0016021]; transport [GO:0006810]	PF00153;	NULL	1 out of 5	NULL	KID71154;	NULL
MAN_10004	635.5	-2.82546	0.125791	-22.4615	9.87637e-112	1.5888e-110	164.305	147.495	166.211	151.275	956.783	1177.19	1280.46	1040.28	KID60471.1	1005	hypothetical protein MAN_10004, partial	MAN_10004	A0A0B4F3M0	A0A0B4F3M0_METAN	unreviewed	Uncharacterized protein (Fragment)	Metarhizium anisopliae ARSEF 549	1005	NULL	NULL	PF08101;	NULL	1 out of 5	NULL	KID60471;	NULL
MAN_03532	3580.54	1.32329	0.0589196	22.4593	1.03773e-111	1.66676e-110	5089.25	5171.72	5364.08	4842.55	1979.06	2056.87	2104.61	2036.22	KID68676.1	427	LEM3/CDC50 family protein, partial	MAN_03532	A0A0B4FSG7	A0A0B4FSG7_METAN	unreviewed	LEM3/CDC50 family protein (Fragment)	Metarhizium anisopliae ARSEF 549	427	GO:0016021	integral component of membrane [GO:0016021]	PF03381;	NULL	1 out of 5	NULL	KID68676;	NULL
MAN_04378	1748.83	-1.45591	0.064903	-22.4321	1.91231e-111	3.06662e-110	925.165	960.126	910.382	940.689	2595.08	2470.39	2486.54	2702.24	KID67620.1	516	Six-hairpin glycosidase, partial	MAN_04378	A0A0B4F0B0	A0A0B4F0B0_METAN	unreviewed	Six-hairpin glycosidase (Fragment)	Metarhizium anisopliae ARSEF 549	516	GO:0008152; GO:0016798	hydrolase activity, acting on glycosyl bonds [GO:0016798]; metabolic process [GO:0008152]	PF06824;	NULL	1 out of 5	NULL	KID67620;	K09704
MAN_04411	1661.4	-3.14777	0.140464	-22.4098	3.15601e-111	5.05308e-110	317.657	317.537	341.236	371.233	3676.71	3244.8	2356.89	2665.12	KID67653.1	364	ergot alkaloid biosynthetic protein B, partial	MAN_04411	A0A0B4FAR9	A0A0B4FAR9_METAN	unreviewed	Ergot alkaloid biosynthetic protein B (Fragment)	Metarhizium anisopliae ARSEF 549	364	NULL	NULL	PF10017;	NULL	1 out of 5	NULL	KID67653;	K20246
MAN_01104	14796.7	-1.66185	0.0742219	-22.3902	4.90013e-111	7.83328e-110	7353.29	7380.38	7192.4	6501.36	24069	21150.8	21108.5	23618.1	KID71505.1	316	GTP-binding protein EsdC, partial	MAN_01104	A0A0B4FBN0	A0A0B4FBN0_METAN	unreviewed	GTP-binding protein EsdC (Fragment)	Metarhizium anisopliae ARSEF 549	316	NULL	NULL	NULL	NULL	1 out of 5	NULL	KID71505;	NULL
MAN_04588	183.627	10.9161	1.02975	10.6007	2.95729e-26	1.17221e-25	345.462	346.66	375.234	401.662	0	0	0	0	KID66307.1	540	P450 monooxygenase, partial	MAN_04588	A0A0B4FEK8	A0A0B4FEK8_METAN	unreviewed	p450 monooxygenase (Fragment)	Metarhizium anisopliae ARSEF 549	540	GO:0004497; GO:0005506; GO:0016021; GO:0016705; GO:0020037	integral component of membrane [GO:0016021]; heme binding [GO:0020037]; iron ion binding [GO:0005506]; monooxygenase activity [GO:0004497]; oxidoreductase activity, acting on paired donors, with incorporation or reduction of molecular oxygen [GO:0016705]	PF00067;	NULL	1 out of 5	NULL	KID66307;	NULL
MAN_01694	1176.65	-2.22632	0.0995614	-22.3613	9.3733e-111	1.49371e-109	430.564	399.27	352.568	470.345	1955.52	2007.46	1787.01	2010.44	KID69180.1	438	Homeodomain-like protein, partial	MAN_01694	A0A0B4F502	A0A0B4F502_METAN	unreviewed	Homeodomain-like protein (Fragment)	Metarhizium anisopliae ARSEF 549	438	GO:0003677	DNA binding [GO:0003677]	PF04433;	NULL	1 out of 5	NULL	KID69180;	NULL
MAN_04267	6914.33	1.33821	0.0598477	22.3603	9.5871e-111	1.5254e-109	9918.14	9868.07	10068.3	9783.34	3580.52	3997.73	4037.36	4061.09	KID67509.1	147	ubiquinol-cytochrome c reductase complex subunit, partial	MAN_04267	A0A0B4GGV7	A0A0B4GGV7_METAN	unreviewed	Ubiquinol-cytochrome c reductase complex subunit (Fragment)	Metarhizium anisopliae ARSEF 549	147	GO:0005739; GO:0006122; GO:0008121	mitochondrion [GO:0005739]; ubiquinol-cytochrome-c reductase activity [GO:0008121]; mitochondrial electron transport, ubiquinol to cytochrome c [GO:0006122]	PF02320;	NULL	1 out of 5	NULL	KID67509;	K00416
MAN_04949	1482.35	-1.73395	0.0776052	-22.3432	1.40588e-110	2.23339e-109	705.249	640.71	737.875	659.874	2155.06	2424.2	2258.39	2277.47	KID66668.1	576	Protein kinase-like domain protein, partial	MAN_04949	A0A0B4F842	A0A0B4F842_METAN	unreviewed	Protein kinase-like domain protein (Fragment)	Metarhizium anisopliae ARSEF 549	576	GO:0004672; GO:0005524	ATP binding [GO:0005524]; protein kinase activity [GO:0004672]	NULL	NULL	1 out of 5	NULL	KID66668;	NULL
MAN_05845	1720.26	2.65442	0.118808	22.342	1.44432e-110	2.29089e-109	3095.68	2997.81	2787.81	2993.34	480.95	588.597	387.957	429.925	KID64834.1	493	Gti1/Pac2 family protein, partial	MAN_05845	A0A0B4G8W2	A0A0B4G8W2_METAN	unreviewed	Gti1/Pac2 family protein (Fragment)	Metarhizium anisopliae ARSEF 549	493	NULL	NULL	PF09729;	NULL	1 out of 5	NULL	KID64834;	K21631
MAN_06964	2629.39	2.59673	0.116254	22.3367	1.62701e-110	2.57665e-109	4553.36	4242.59	4572.06	4682.58	603.746	890.414	817.121	673.24	KID63793.1	705	Mitochondrial carrier domain protein, partial	MAN_06964	A0A0B4F092	A0A0B4F092_METAN	unreviewed	Mitochondrial carrier domain protein (Fragment)	Metarhizium anisopliae ARSEF 549	705	GO:0005509; GO:0016021; GO:0055085	integral component of membrane [GO:0016021]; calcium ion binding [GO:0005509]; transmembrane transport [GO:0055085]	PF13499;PF00153;	NULL	1 out of 5	NULL	KID63793;	K15105
MAN_09384	55845.2	10.8184	0.388106	27.8747	5.40027e-171	1.55342e-169	111404	111194	114857	109059	34.7921	89.1488	92.4663	30.9299	KID61100.1	909	steroid monooxygenase, partial	MAN_09384	A0A0B4EG42	A0A0B4EG42_METAN	unreviewed	Steroid monooxygenase (Fragment)	Metarhizium anisopliae ARSEF 549	909	GO:0004499; GO:0050660; GO:0050661	flavin adenine dinucleotide binding [GO:0050660]; N,N-dimethylaniline monooxygenase activity [GO:0004499]; NADP binding [GO:0050661]	PF00743;PF08242;	NULL	1 out of 5	NULL	KID61100;	NULL
MAN_05944	998.724	2.2152	0.0992286	22.3242	2.1505e-110	3.39512e-109	1585.76	1594.26	1751.51	1642.29	315.176	406.003	323.632	371.159	KID64933.1	289	MYB DNA-binding domain-containing protein, partial	MAN_05944	A0A0B4F350	A0A0B4F350_METAN	unreviewed	MYB DNA-binding domain-containing protein (Fragment)	Metarhizium anisopliae ARSEF 549	289	GO:0003677	DNA binding [GO:0003677]	NULL	NULL	1 out of 5	NULL	KID64933;	NULL
MAN_04929	3208.91	-2.09805	0.094112	-22.2931	4.31208e-110	6.79719e-109	1258.83	1113.26	1208.81	1278.89	4905.69	5780.71	4569.04	5556.04	KID66648.1	622	Basic-leucine zipper (bZIP) transcription factor, partial	MAN_04929	A0A0B4F824	A0A0B4F824_METAN	unreviewed	Basic-leucine zipper (BZIP) transcription factor (Fragment)	Metarhizium anisopliae ARSEF 549	622	GO:0003700	transcription factor activity, sequence-specific DNA binding [GO:0003700]	PF00170;	NULL	1 out of 5	NULL	KID66648;	NULL
MAN_05725	5458.17	1.63031	0.0731352	22.2917	4.44385e-110	6.99409e-109	8110.78	8569.74	8179.59	8143.66	2360.75	2887.13	2719.72	2693.99	KID66066.1	327	glycoside hydrolase family 12, partial	MAN_05725	A0A0B4FJU9	A0A0B4FJU9_METAN	unreviewed	Glycoside hydrolase family 12 (Fragment)	Metarhizium anisopliae ARSEF 549	327	GO:0000272; GO:0008810	cellulase activity [GO:0008810]; polysaccharide catabolic process [GO:0000272]	PF01670;	SIGNAL 1 20 {ECO:0000256|SAM:SignalP}.	1 out of 5	NULL	KID66066;	NULL
MAN_06573	278.319	4.39342	0.197142	22.2856	5.10001e-110	8.01441e-109	522.407	499.792	554.036	549.46	37.862	16.1112	21.1064	25.7749	KID64399.1	412	C6 finger domain-containing protein, partial	MAN_06573	A0A0B4G7N0	A0A0B4G7N0_METAN	unreviewed	C6 finger domain-containing protein (Fragment)	Metarhizium anisopliae ARSEF 549	412	GO:0000981; GO:0005634; GO:0008270	nucleus [GO:0005634]; RNA polymerase II transcription factor activity, sequence-specific DNA binding [GO:0000981]; zinc ion binding [GO:0008270]	PF11951;	NULL	1 out of 5	NULL	KID64399;	NULL
MAN_02623	2792.98	-1.68588	0.0756775	-22.2772	6.14749e-110	9.64559e-109	1359.94	1367.85	1241.54	1325.83	4521.95	4022.44	3973.04	4531.23	KID70109.1	542	Pal1 cell morphology protein, partial	MAN_02623	A0A0B4GPM3	A0A0B4GPM3_METAN	unreviewed	Pal1 cell morphology protein (Fragment)	Metarhizium anisopliae ARSEF 549	542	NULL	NULL	PF08316;	NULL	1 out of 5	NULL	KID70109;	NULL
MAN_05488	1295.49	-3.04772	0.13685	-22.2705	7.14156e-110	1.11881e-108	269.629	295.929	277.018	275.599	1718.12	2477.91	2360.91	2688.84	KID65829.1	1448	pfs, ankyrin repeats & 6-phosphofructo-2-kinase, partial	MAN_05488	A0A0B4GBZ9	A0A0B4GBZ9_METAN	unreviewed	Pfs, ankyrin repeats & 6-phosphofructo-2-kinase (Fragment)	Metarhizium anisopliae ARSEF 549	1448	GO:0016021; GO:0016301	integral component of membrane [GO:0016021]; kinase activity [GO:0016301]	PF12796;	SIGNAL 1 16 {ECO:0000256|SAM:SignalP}.	1 out of 5	NULL	KID65829;	NULL
MAN_08499	534.661	-4.06241	0.182511	-22.2584	9.34458e-110	1.46169e-108	45.4999	64.8226	44.0711	85.2011	973.156	1002.12	902.552	1159.87	KID61820.1	288	hypothetical protein MAN_08499, partial	MAN_08499	A0A0B4EI68	A0A0B4EI68_METAN	unreviewed	Uncharacterized protein (Fragment)	Metarhizium anisopliae ARSEF 549	288	GO:0016021	integral component of membrane [GO:0016021]	NULL	NULL	1 out of 5	NULL	KID61820;	NULL
MAN_07228	0	NA	NA	NA	NA	NA	0	0	0	0	0	0	0	0	KID64057.1	191	polyketide synthase, partial	MAN_07228	A0A0B4F8M8	A0A0B4F8M8_METAN	unreviewed	Polyketide synthase (Fragment)	Metarhizium anisopliae ARSEF 549	191	NULL	NULL	NULL	NULL	1 out of 5	NULL	KID64057;	NULL
MAN_04259	840.213	-4.31768	0.194197	-22.2335	1.62983e-109	2.54158e-108	63.1943	90.188	99.4747	70.4213	2208.28	1404.9	1458.35	1326.89	KID67501.1	622	glycoside hydrolase, partial	MAN_04259	A0A0B4FP68	A0A0B4FP68_METAN	unreviewed	Glycoside hydrolase (Fragment)	Metarhizium anisopliae ARSEF 549	622	GO:0004553; GO:0005975	hydrolase activity, hydrolyzing O-glycosyl compounds [GO:0004553]; carbohydrate metabolic process [GO:0005975]	PF00232;	SIGNAL 1 20 {ECO:0000256|SAM:SignalP}.	1 out of 5	NULL	KID67501;	NULL
MAN_04462	1933.88	1.61768	0.0727912	22.2235	2.0345e-109	3.16779e-108	3003.84	2877.56	2918.76	2869.02	887.199	894.711	1030.2	989.756	KID67704.1	327	cytochrome c heme lyase, partial	MAN_04462	A0A0B4GHC7	A0A0B4GHC7_METAN	unreviewed	Cytochrome c heme lyase (EC 4.4.1.17) (Fragment)	Metarhizium anisopliae ARSEF 549	327	GO:0004408; GO:0005743; GO:0046872	mitochondrial inner membrane [GO:0005743]; holocytochrome-c synthase activity [GO:0004408]; metal ion binding [GO:0046872]	PF01265;	NULL	2 out of 5	NULL	KID67704;	K01764
MAN_03280	517.609	-2.57535	0.115945	-22.2118	2.63982e-109	4.10401e-108	151.666	142.798	151.101	149.537	794.079	833.488	937.729	980.477	KID68424.1	508	GSG2, Protein Kinase, partial	MAN_03280	A0A0B4GJD2	A0A0B4GJD2_METAN	unreviewed	GSG2, Protein Kinase (Fragment)	Metarhizium anisopliae ARSEF 549	508	GO:0016301	kinase activity [GO:0016301]	NULL	NULL	1 out of 5	NULL	KID68424;	K16315
MAN_07741	1321.39	-2.00929	0.0905023	-22.2015	3.31894e-109	5.15194e-108	529.147	509.186	502.41	560.762	1885.94	2298.54	2225.22	2059.93	KID63540.1	1090	CHIP6 protein, partial	MAN_07741	A0A0B4ENE2	A0A0B4ENE2_METAN	unreviewed	CHIP6 protein (Fragment)	Metarhizium anisopliae ARSEF 549	1090	GO:0005975; GO:0016758; GO:0030259	transferase activity, transferring hexosyl groups [GO:0016758]; carbohydrate metabolic process [GO:0005975]; lipid glycosylation [GO:0030259]	PF03033;PF00201;	NULL	1 out of 5	NULL	KID63540;	NULL
MAN_04417	3281.64	-2.06638	0.093087	-22.1984	3.5622e-109	5.52113e-108	1284.11	1277.66	1206.29	1290.19	4708.19	5656.12	4838.4	5992.15	KID67659.1	375	cyclin, partial	MAN_04417	A0A0B4GH92	A0A0B4GH92_METAN	unreviewed	Cyclin (Fragment)	Metarhizium anisopliae ARSEF 549	375	NULL	NULL	PF00134;	NULL	1 out of 5	NULL	KID67659;	NULL
MAN_04280	405.832	-3.8974	0.175645	-22.189	4.38189e-109	6.78127e-108	30.3333	60.1253	52.8853	61.7273	774.636	750.784	816.116	700.046	KID67522.1	586	fatty acid desaturase, partial	MAN_04280	A0A0B4FI32	A0A0B4FI32_METAN	unreviewed	Fatty acid desaturase (Fragment)	Metarhizium anisopliae ARSEF 549	586	GO:0006629; GO:0016021; GO:0016491	integral component of membrane [GO:0016021]; oxidoreductase activity [GO:0016491]; lipid metabolic process [GO:0006629]	PF00173;PF00487;	NULL	1 out of 5	NULL	KID67522;	NULL
MAN_04395	7393.14	1.90972	0.0861193	22.1753	5.94588e-109	9.1877e-108	11990.9	12094.6	11542.8	11084	3493.54	3297.43	2827.26	2814.62	KID67637.1	479	Pyridoxal phosphate-dependent transferase, major domain protein, partial	MAN_04395	A0A0B4FIF7	A0A0B4FIF7_METAN	unreviewed	Pyridoxal phosphate-dependent transferase, major domain protein (Fragment)	Metarhizium anisopliae ARSEF 549	479	GO:0009058; GO:0016740; GO:0030170	pyridoxal phosphate binding [GO:0030170]; transferase activity [GO:0016740]; biosynthetic process [GO:0009058]	PF00155;	NULL	1 out of 5	NULL	KID67637;	K00814
MAN_02450	1241.42	-4.09116	0.184502	-22.1741	6.10274e-109	9.41579e-108	107.852	131.524	129.695	180.835	1699.7	2757.17	2175.97	2748.64	KID69936.1	589	secreted aspartic proteinase, partial	MAN_02450	A0A0B4FW60	A0A0B4FW60_METAN	unreviewed	Secreted aspartic proteinase (Fragment)	Metarhizium anisopliae ARSEF 549	589	GO:0004190	aspartic-type endopeptidase activity [GO:0004190]	PF00026;	NULL	1 out of 5	NULL	KID69936;	NULL
MAN_08624	978.07	-1.74057	0.0785439	-22.1605	8.25541e-109	1.27178e-107	470.166	465.032	441.97	424.267	1444.9	1546.68	1462.38	1569.18	KID61945.1	413	Carbohydrate/purine kinase, partial	MAN_08624	A0A0B4EIK6	A0A0B4EIK6_METAN	unreviewed	Carbohydrate/purine kinase (Fragment)	Metarhizium anisopliae ARSEF 549	413	GO:0016301	kinase activity [GO:0016301]	PF00294;	NULL	1 out of 5	NULL	KID61945;	NULL
MAN_10437	4771.88	2.40327	0.108567	22.1363	1.41442e-108	2.17568e-107	8187.46	8163.89	7823.24	7930.66	1230	1785.12	1645.3	1409.37	KID59796.1	1106	elongation factor 3, partial	MAN_10437	A0A0B4F1T6	A0A0B4F1T6_METAN	unreviewed	Elongation factor 3 (Fragment)	Metarhizium anisopliae ARSEF 549	1106	GO:0003746; GO:0005524; GO:0016887	ATP binding [GO:0005524]; ATPase activity [GO:0016887]; translation elongation factor activity [GO:0003746]	PF00005;PF00385;	NULL	1 out of 5	NULL	KID59796;	K03235
MAN_08871	888.668	-5.32368	0.240629	-22.124	1.85519e-108	2.84938e-107	45.4999	26.3048	32.7385	66.9437	1791.79	2315.72	1348.8	1481.54	KID61632.1	239	hypothetical protein MAN_08871, partial	MAN_08871	A0A0B4F1B0	A0A0B4F1B0_METAN	unreviewed	Uncharacterized protein (Fragment)	Metarhizium anisopliae ARSEF 549	239	NULL	NULL	NULL	SIGNAL 1 19 {ECO:0000256|SAM:SignalP}.	1 out of 5	NULL	KID61632;	NULL
MAN_05826	5472.03	-1.92785	0.0871657	-22.1171	2.16484e-108	3.31997e-107	2075.3	2184.24	2452.87	2401.28	7892.69	9508.85	8231.51	9029.46	KID64815.1	379	t-SNARE protein, partial	MAN_05826	A0A0B4ES51	A0A0B4ES51_METAN	unreviewed	t-SNARE protein (Fragment)	Metarhizium anisopliae ARSEF 549	379	GO:0016021; GO:0016192	integral component of membrane [GO:0016021]; vesicle-mediated transport [GO:0016192]	PF05739;PF00804;	NULL	1 out of 5	NULL	KID64815;	K08486
MAN_07058	1662.46	-1.94256	0.087837	-22.1155	2.24334e-108	3.43517e-107	644.582	716.806	701.359	684.217	2302.42	2686.28	2808.16	2755.85	KID63887.1	443	hypothetical protein MAN_07058, partial	MAN_07058	A0A0B4F7Y7	A0A0B4F7Y7_METAN	unreviewed	Uncharacterized protein (Fragment)	Metarhizium anisopliae ARSEF 549	443	NULL	NULL	NULL	NULL	1 out of 5	NULL	KID63887;	NULL
MAN_01986	2350.91	1.78898	0.0809284	22.1057	2.78443e-108	4.25734e-107	3633.25	3450.63	3893.36	3609.74	1011.02	1129.93	1126.68	952.64	KID69472.1	449	decaprenyl-diphosphate synthase subunit 1, partial	MAN_01986	A0A0B4FNW9	A0A0B4FNW9_METAN	unreviewed	Decaprenyl-diphosphate synthase subunit 1 (Fragment)	Metarhizium anisopliae ARSEF 549	449	GO:0008299; GO:0016740	transferase activity [GO:0016740]; isoprenoid biosynthetic process [GO:0008299]	PF00348;	NULL	1 out of 5	NULL	KID69472;	K05355
MAN_09864	491.643	3.02081	0.136697	22.0986	3.26122e-108	4.97887e-107	797.934	844.573	1036.3	823.321	118.703	109.556	93.4714	109.286	KID60331.1	347	Acyl CoA acyltransferase-like protein, partial	MAN_09864	A0A0B4F395	A0A0B4F395_METAN	unreviewed	Acyl CoA acyltransferase-like protein (Fragment)	Metarhizium anisopliae ARSEF 549	347	GO:0016746	transferase activity, transferring acyl groups [GO:0016746]	NULL	NULL	1 out of 5	NULL	KID60331;	NULL
MAN_08965	346.534	-4.80171	0.217447	-22.0822	4.68252e-108	7.13803e-107	16.0092	23.4864	20.1468	35.6453	546.441	737.895	648.269	744.379	KID61726.1	532	Permease, cytosine/purine, uracil, thiamine, allantoin, partial	MAN_08965	A0A0B4F7A9	A0A0B4F7A9_METAN	unreviewed	Permease, cytosine/purine, uracil, thiamine, allantoin (Fragment)	Metarhizium anisopliae ARSEF 549	532	GO:0005215; GO:0016021; GO:0055085	integral component of membrane [GO:0016021]; transporter activity [GO:0005215]; transmembrane transport [GO:0055085]	PF02133;	NULL	1 out of 5	NULL	KID61726;	NULL
MAN_07220	258.146	3.93223	0.17816	22.0713	5.96408e-108	9.07805e-107	464.268	462.213	499.892	512.076	31.7222	30.0743	41.2078	23.7129	KID64049.1	182	hypothetical protein MAN_07220, partial	MAN_07220	A0A0B4G6P3	A0A0B4G6P3_METAN	unreviewed	Uncharacterized protein (Fragment)	Metarhizium anisopliae ARSEF 549	182	NULL	NULL	PF13577;	SIGNAL 1 20 {ECO:0000256|SAM:SignalP}.	1 out of 5	NULL	KID64049;	NULL
MAN_00181	545.51	-3.36389	0.152417	-22.0703	6.09709e-108	9.26667e-107	100.268	102.401	78.0687	103.458	898.455	1045.08	1194.02	842.324	KID70582.1	358	DUF803 domain membrane protein, partial	MAN_00181	A0A0B4FS92	A0A0B4FS92_METAN	unreviewed	DUF803 domain membrane protein (Fragment)	Metarhizium anisopliae ARSEF 549	358	GO:0015095; GO:0016021	integral component of membrane [GO:0016021]; magnesium ion transmembrane transporter activity [GO:0015095]	PF05653;	NULL	1 out of 5	NULL	KID70582;	NULL
MAN_08880	12642.2	1.73448	0.0786566	22.0513	9.27897e-108	1.40816e-106	19467.2	19724.9	19576.4	18998.1	6000.62	6506.79	5104.74	5759.14	KID61641.1	502	Ran1-like protein kinase, partial	MAN_08880	A0A0B4F731	A0A0B4F731_METAN	unreviewed	Ran1-like protein kinase (Fragment)	Metarhizium anisopliae ARSEF 549	502	GO:0004672; GO:0005524	ATP binding [GO:0005524]; protein kinase activity [GO:0004672]	PF00069;	NULL	1 out of 5	NULL	KID61641;	NULL
MAN_01393	1149.6	2.30708	0.104943	21.9841	4.08778e-107	6.19432e-106	1830.95	1845.1	2096.52	1878.77	315.176	402.781	415.093	412.398	KID71794.1	575	Amino-acid permease inda1, partial	MAN_01393	A0A0B4GUX6	A0A0B4GUX6_METAN	unreviewed	Amino-acid permease inda1 (Fragment)	Metarhizium anisopliae ARSEF 549	575	GO:0015171; GO:0016021	integral component of membrane [GO:0016021]; amino acid transmembrane transporter activity [GO:0015171]	PF00324;	NULL	1 out of 5	NULL	KID71794;	K16261
MAN_04212	2015.1	-1.74399	0.0794797	-21.9426	1.01915e-106	1.54205e-105	887.249	965.763	894.013	958.077	2804.86	3316.77	3242.35	3051.75	KID67454.1	639	G1/S regulator, partial	MAN_04212	A0A0B4GGQ1	A0A0B4GGQ1_METAN	unreviewed	G1/S regulator (Fragment)	Metarhizium anisopliae ARSEF 549	639	GO:0003676; GO:0008270	nucleic acid binding [GO:0003676]; zinc ion binding [GO:0008270]	PF08630;PF07535;	NULL	1 out of 5	NULL	KID67454;	K02309
MAN_01102	1189.87	-1.93699	0.0883471	-21.9248	1.50717e-106	2.27708e-105	483.647	545.825	465.894	474.692	1723.23	1904.35	2022.2	1899.09	KID71503.1	697	hypothetical protein MAN_01102, partial	MAN_01102	A0A0B4FM69	A0A0B4FM69_METAN	unreviewed	Uncharacterized protein (Fragment)	Metarhizium anisopliae ARSEF 549	697	NULL	NULL	PF12709;	NULL	1 out of 5	NULL	KID71503;	NULL
MAN_02774	477.74	2.88538	0.131687	21.9108	2.04959e-106	3.09199e-105	797.091	854.907	870.089	845.056	128.935	85.9266	131.664	108.255	KID67918.1	570	Major facilitator superfamily domain, general substrate transporter, partial	MAN_02774	A0A0B4FBG0	A0A0B4FBG0_METAN	unreviewed	Major facilitator superfamily domain, general substrate transporter (Fragment)	Metarhizium anisopliae ARSEF 549	570	GO:0016021; GO:0055085	integral component of membrane [GO:0016021]; transmembrane transport [GO:0055085]	PF07690;	NULL	1 out of 5	NULL	KID67918;	NULL
MAN_07123	4261.76	2.8408	0.0967935	29.3491	2.45476e-189	8.22263e-188	8105.73	7857.63	7042.55	6911.72	906.642	1040.79	1038.24	1190.8	KID63952.1	503	retinal dehydrogenase 2, partial	MAN_07123	A0A0B4F876	A0A0B4F876_METAN	unreviewed	Retinal dehydrogenase 2 (Fragment)	Metarhizium anisopliae ARSEF 549	503	GO:0016491	oxidoreductase activity [GO:0016491]	PF00171;	NULL	1 out of 5	NULL	KID63952;	K00129
MAN_06141	514.605	-5.58174	0.255142	-21.877	4.30677e-106	6.47797e-105	16.8518	21.6075	8.81421	34.7759	850.36	947.341	1325.69	911.401	KID65130.1	469	Ergosterol biosynthesis ERG4/ERG24, partial	MAN_06141	A0A0B4ET87	A0A0B4ET87_METAN	unreviewed	Ergosterol biosynthesis ERG4/ERG24 (Fragment)	Metarhizium anisopliae ARSEF 549	469	GO:0016021; GO:0016628	integral component of membrane [GO:0016021]; oxidoreductase activity, acting on the CH-CH group of donors, NAD or NADP as acceptor [GO:0016628]	PF01222;	NULL	1 out of 5	NULL	KID65130;	K00223
MAN_10335	9632.86	-1.90322	0.0870923	-21.8529	7.29218e-106	1.09523e-104	3827.05	4247.29	4130.09	4053.14	13293.7	15898.6	17078.1	14535	KID59883.1	542	Regulator of G protein signaling superfamily, partial	MAN_10335	A0A0B4ENQ7	A0A0B4ENQ7_METAN	unreviewed	Regulator of G protein signaling superfamily (Fragment)	Metarhizium anisopliae ARSEF 549	542	GO:0016021	integral component of membrane [GO:0016021]	NULL	NULL	1 out of 5	NULL	KID59883;	NULL
MAN_01829	386.168	3.17325	0.14523	21.8499	7.79685e-106	1.1693e-104	738.11	687.683	648.474	705.952	70.6075	100.964	63.3193	74.2317	KID69315.1	144	Endoribonuclease L-PSP/chorismate mutase-like protein, partial	MAN_01829	A0A0B4F5B7	A0A0B4F5B7_METAN	unreviewed	Endoribonuclease L-PSP/chorismate mutase-like protein (Fragment)	Metarhizium anisopliae ARSEF 549	144	NULL	NULL	PF01042;	NULL	1 out of 5	NULL	KID69315;	NULL
MAN_05206	1614.14	-2.04366	0.0935573	-21.8439	8.88714e-106	1.33085e-104	597.397	669.833	589.293	662.482	2426.24	2560.61	2449.35	2957.93	KID65547.1	601	sulfite reductase flavoprotein alpha-component, partial	MAN_05206	A0A0B4FCR4	A0A0B4FCR4_METAN	unreviewed	Sulfite reductase flavoprotein alpha-component (Fragment)	Metarhizium anisopliae ARSEF 549	601	GO:0003958; GO:0010181	FMN binding [GO:0010181]; NADPH-hemoprotein reductase activity [GO:0003958]	PF00667;PF00258;PF00175;	NULL	1 out of 5	NULL	KID65547;	NULL
MAN_10190	799.051	1.76654	0.0809711	21.8169	1.60311e-105	2.39713e-104	1222.6	1210.96	1259.17	1247.59	352.014	372.707	339.713	387.655	KID60160.1	222	hypothetical protein MAN_10190, partial	MAN_10190	A0A0B4EDC2	A0A0B4EDC2_METAN	unreviewed	Uncharacterized protein (Fragment)	Metarhizium anisopliae ARSEF 549	222	NULL	NULL	NULL	SIGNAL 1 16 {ECO:0000256|SAM:SignalP}.	1 out of 5	NULL	KID60160;	NULL
MAN_06798	4502.73	1.86213	0.0854449	21.7933	2.68559e-105	4.00987e-104	6812.35	6548.96	7548.74	7341.2	2135.62	2042.9	1836.26	1755.79	KID64624.1	549	acetamidase, partial	MAN_06798	A0A0B4G8A9	A0A0B4G8A9_METAN	unreviewed	Acetamidase (Fragment)	Metarhizium anisopliae ARSEF 549	549	GO:0004040	amidase activity [GO:0004040]	PF01425;	NULL	1 out of 5	NULL	KID64624;	K01426
MAN_01245	177.917	-4.30685	0.316889	-13.591	4.52551e-42	2.64087e-41	10.1111	21.6075	13.8509	22.6044	201.59	421.04	299.51	433.018	KID71646.1	531	C2H2 finger domain-containing protein, partial	MAN_01245	A0A0B4G140	A0A0B4G140_METAN	unreviewed	C2H2 finger domain-containing protein (Fragment)	Metarhizium anisopliae ARSEF 549	531	NULL	NULL	NULL	NULL	1 out of 5	NULL	KID71646;	NULL
MAN_06280	126.197	2.64029	0.208173	12.6831	7.33598e-37	3.82299e-36	235.083	211.378	201.468	221.697	29.6756	40.8151	25.1267	44.3328	KID65269.1	320	Alcohol dehydrogenase superfamily, zinc-type, partial	MAN_06280	A0A0B4GAC1	A0A0B4GAC1_METAN	unreviewed	Alcohol dehydrogenase superfamily, zinc-type (Fragment)	Metarhizium anisopliae ARSEF 549	320	GO:0016491	oxidoreductase activity [GO:0016491]	PF08240;	NULL	1 out of 5	NULL	KID65269;	NULL
MAN_07420	1774.88	3.0389	0.139619	21.7657	4.90236e-105	7.2877e-104	3490.86	3238.31	2462.94	3466.29	326.432	352.299	400.017	461.886	KID63219.1	367	NAD(P)-binding domain protein, partial	MAN_07420	A0A0B4G463	A0A0B4G463_METAN	unreviewed	NAD(P)-binding domain protein (Fragment)	Metarhizium anisopliae ARSEF 549	367	GO:0016491	oxidoreductase activity [GO:0016491]	PF01408;PF02894;	NULL	1 out of 5	NULL	KID63219;	NULL
MAN_01756	3722.08	1.8808	0.0865087	21.7411	8.3847e-105	1.24463e-103	5979.03	5831.22	5318.75	6287.49	1458.2	1624.01	1501.57	1776.41	KID69242.1	153	Cupin family protein, partial	MAN_01756	A0A0B4FN66	A0A0B4FN66_METAN	unreviewed	Cupin family protein (Fragment)	Metarhizium anisopliae ARSEF 549	153	NULL	NULL	PF06172;	NULL	1 out of 5	NULL	KID69242;	K09705
MAN_03111	6591.39	-0.97587	0.0448896	-21.7394	8.71046e-105	1.2911e-103	4486.8	4472.76	4344.15	4466.97	8625.37	8809.62	8609.42	8916.05	KID68255.1	190	Small GTPase superfamily, ARF/SAR type, partial	MAN_03111	A0A0B4F248	A0A0B4F248_METAN	unreviewed	Small GTPase superfamily, ARF/SAR type (Fragment)	Metarhizium anisopliae ARSEF 549	190	GO:0005525; GO:0005783; GO:0005794; GO:0006886; GO:0016192	endoplasmic reticulum [GO:0005783]; Golgi apparatus [GO:0005794]; GTP binding [GO:0005525]; intracellular protein transport [GO:0006886]; vesicle-mediated transport [GO:0016192]	PF00025;	NULL	1 out of 5	NULL	KID68255;	K07953
MAN_05911	1623.41	-2.19371	0.100957	-21.7291	1.08975e-104	1.61292e-103	587.286	608.769	547.74	584.236	2343.35	2793.69	2469.45	3052.78	KID64900.1	535	Calcium/calmodulin-dependent/calcium-dependent protein kinase, partial	MAN_05911	A0A0B4ESE3	A0A0B4ESE3_METAN	unreviewed	Calcium/calmodulin-dependent/calcium-dependent protein kinase (Fragment)	Metarhizium anisopliae ARSEF 549	535	GO:0004672; GO:0005524	ATP binding [GO:0005524]; protein kinase activity [GO:0004672]	PF00069;	NULL	1 out of 5	NULL	KID64900;	K02216
MAN_03151	350.629	-3.4432	0.158749	-21.6896	2.57119e-104	3.80007e-103	41.287	57.3069	61.6995	76.5071	644.677	648.746	620.127	654.683	KID68295.1	523	Major facilitator superfamily domain, general substrate transporter, partial	MAN_03151	A0A0B4F279	A0A0B4F279_METAN	unreviewed	Major facilitator superfamily domain, general substrate transporter (Fragment)	Metarhizium anisopliae ARSEF 549	523	GO:0016021; GO:0055085	integral component of membrane [GO:0016021]; transmembrane transport [GO:0055085]	PF07690;	NULL	1 out of 5	NULL	KID68295;	NULL
MAN_06458	1850.89	1.6178	0.0746178	21.6812	3.08775e-104	4.55689e-103	2762.01	2772.34	2787.81	2845.54	952.69	928.007	804.055	954.702	KID64284.1	346	endonuclease/exonuclease/phosphatase family protein, partial	MAN_06458	A0A0B4G7A6	A0A0B4G7A6_METAN	unreviewed	Endonuclease/exonuclease/phosphatase family protein (Fragment)	Metarhizium anisopliae ARSEF 549	346	GO:0004519; GO:0004527	endonuclease activity [GO:0004519]; exonuclease activity [GO:0004527]	PF03372;	NULL	1 out of 5	NULL	KID64284;	K19619
MAN_04393	456.948	-4.16779	0.192272	-21.6766	3.41418e-104	5.03134e-103	44.6573	38.5178	45.3302	63.4661	653.887	964.526	850.288	994.911	KID67635.1	1035	hypothetical protein MAN_04393, partial	MAN_04393	A0A0B4F0C2	A0A0B4F0C2_METAN	unreviewed	Uncharacterized protein (Fragment)	Metarhizium anisopliae ARSEF 549	1035	NULL	NULL	NULL	NULL	1 out of 5	NULL	KID67635;	NULL
MAN_02798	919.002	-3.74513	0.172776	-21.6762	3.44508e-104	5.06954e-103	122.176	117.432	88.1421	179.096	1942.22	1683.09	1476.45	1743.41	KID67942.1	860	glycoside hydrolase family 92 protein, partial	MAN_02798	A0A0B4FJ84	A0A0B4FJ84_METAN	unreviewed	Glycoside hydrolase family 92 protein (Fragment)	Metarhizium anisopliae ARSEF 549	860	GO:0016787; GO:0030246	carbohydrate binding [GO:0030246]; hydrolase activity [GO:0016787]	PF07971;	SIGNAL 1 19 {ECO:0000256|SAM:SignalP}.	1 out of 5	NULL	KID67942;	NULL
MAN_00983	4745.71	1.29802	0.0599214	21.6621	4.67827e-104	6.87429e-103	7006.15	6699.27	6667.32	6616.12	2724.02	2699.17	2610.16	2943.49	KID71384.1	218	hypothetical protein MAN_00983, partial	MAN_00983	A0A0B4GTM1	A0A0B4GTM1_METAN	unreviewed	Uncharacterized protein (Fragment)	Metarhizium anisopliae ARSEF 549	218	NULL	NULL	NULL	NULL	1 out of 5	NULL	KID71384;	NULL
MAN_05072	2307.13	1.66844	0.0770836	21.6446	6.83727e-104	1.00323e-102	3459.68	3507	3670.49	3404.57	1071.39	997.823	1217.14	1128.94	KID66791.1	1090	sulfate transporter family protein, partial	MAN_05072	A0A0B4FLZ4	A0A0B4FLZ4_METAN	unreviewed	Sulfate transporter family protein (Fragment)	Metarhizium anisopliae ARSEF 549	1090	GO:0008271; GO:0016021	integral component of membrane [GO:0016021]; secondary active sulfate transmembrane transporter activity [GO:0008271]	PF00027;PF01740;PF00916;	NULL	1 out of 5	NULL	KID66791;	K03321
MAN_09791	907.62	-3.23434	0.149599	-21.6201	1.16291e-103	1.70387e-102	169.361	157.829	191.394	179.966	1267.87	1618.64	1623.19	2052.71	KID60656.1	336	hypothetical protein MAN_09791, partial	MAN_09791	A0A0B4F444	A0A0B4F444_METAN	unreviewed	Uncharacterized protein (Fragment)	Metarhizium anisopliae ARSEF 549	336	NULL	NULL	NULL	NULL	1 out of 5	NULL	KID60656;	NULL
MAN_05502	1074.17	1.87179	0.0865779	21.6197	1.17221e-103	1.71504e-102	1660.75	1785.91	1640.7	1662.29	465.6	426.411	516.605	435.08	KID65843.1	191	2Fe-2S iron-sulfur cluster binding domain protein, partial	MAN_05502	A0A0B4F5U2	A0A0B4F5U2_METAN	unreviewed	2Fe-2S iron-sulfur cluster binding domain protein (Fragment)	Metarhizium anisopliae ARSEF 549	191	GO:0009055; GO:0051537	2 iron, 2 sulfur cluster binding [GO:0051537]; electron carrier activity [GO:0009055]	PF00111;	NULL	1 out of 5	NULL	KID65843;	K22071
MAN_03061	572.703	-3.65551	0.1691	-21.6174	1.23105e-103	1.79853e-102	101.111	68.5804	55.4036	107.805	1166.56	1026.82	1017.13	1038.21	KID68205.1	376	amidohydrolase 2, partial	MAN_03061	A0A0B4F205	A0A0B4F205_METAN	unreviewed	Amidohydrolase 2 (Fragment)	Metarhizium anisopliae ARSEF 549	376	GO:0016787	hydrolase activity [GO:0016787]	PF04909;	NULL	1 out of 5	NULL	KID68205;	K22213
MAN_09251	50831.5	2.37284	0.110107	21.5502	5.26905e-103	7.68692e-102	86373.2	87611	83756.4	83105.8	20592.8	15543	13955.4	15714.4	KID61486.1	487	catalase, partial	MAN_09251	A0A0B4F6L0	A0A0B4F6L0_METAN	unreviewed	Catalase (EC 1.11.1.6) (Fragment)	Metarhizium anisopliae ARSEF 549	487	GO:0004096; GO:0006979; GO:0020037; GO:0042744; GO:0046872	catalase activity [GO:0004096]; heme binding [GO:0020037]; metal ion binding [GO:0046872]; hydrogen peroxide catabolic process [GO:0042744]; response to oxidative stress [GO:0006979]	PF00199;PF06628;	NULL	2 out of 5	NULL	KID61486;	K03781
MAN_10291	523.616	-3.06012	0.142042	-21.5437	6.06156e-103	8.83046e-102	101.954	124.948	109.548	112.152	1142	838.858	856.319	903.153	KID60041.1	606	peroxidase family protein, partial	MAN_10291	A0A0B4F2J6	A0A0B4F2J6_METAN	unreviewed	Peroxidase family protein (Fragment)	Metarhizium anisopliae ARSEF 549	606	GO:0004601; GO:0006979; GO:0020037	heme binding [GO:0020037]; peroxidase activity [GO:0004601]; response to oxidative stress [GO:0006979]	PF03098;	NULL	1 out of 5	NULL	KID60041;	NULL
MAN_00357	932.644	-2.75838	0.128054	-21.5408	6.45803e-103	9.39459e-102	195.481	227.349	278.277	262.558	1388.61	1689.53	1776.96	1642.38	KID70758.1	612	Glycoside hydrolase, family 76, partial	MAN_00357	A0A0B4FJY4	A0A0B4FJY4_METAN	unreviewed	Glycoside hydrolase, family 76 (Fragment)	Metarhizium anisopliae ARSEF 549	612	GO:0016787	hydrolase activity [GO:0016787]	PF03663;	SIGNAL 1 21 {ECO:0000256|SAM:SignalP}.	1 out of 5	NULL	KID70758;	NULL
MAN_04251	1743.44	2.0632	0.0958286	21.5301	8.13553e-103	1.1818e-101	3000.47	2781.73	2523.38	2948.13	774.636	636.931	652.29	629.939	KID67493.1	425	3-ketoacyl-CoA thiolase, partial	MAN_04251	A0A0B4FAA6	A0A0B4FAA6_METAN	unreviewed	3-ketoacyl-CoA thiolase (Fragment)	Metarhizium anisopliae ARSEF 549	425	GO:0008152; GO:0016747	transferase activity, transferring acyl groups other than amino-acyl groups [GO:0016747]; metabolic process [GO:0008152]	PF02803;PF00108;	NULL	1 out of 5	NULL	KID67493;	K07513
MAN_05148	248.852	-4.75364	0.221165	-21.4937	1.78487e-102	2.58908e-101	21.0648	9.39458	16.3692	23.4738	521.882	490.856	420.119	487.661	KID66867.1	343	CheY-like superfamily, partial	MAN_05148	A0A0B4FG63	A0A0B4FG63_METAN	unreviewed	CheY-like superfamily (Fragment)	Metarhizium anisopliae ARSEF 549	343	GO:0000160; GO:0005622	intracellular [GO:0005622]; phosphorelay signal transduction system [GO:0000160]	PF00072;	NULL	1 out of 5	NULL	KID66867;	NULL
MAN_02782	1073.19	2.0539	0.0955636	21.4925	1.82885e-102	2.6491e-101	1690.24	1733.3	1741.44	1754.45	469.694	377.003	368.86	450.545	KID67926.1	646	hypothetical protein MAN_02782, partial	MAN_02782	A0A0B4FQE6	A0A0B4FQE6_METAN	unreviewed	Uncharacterized protein (Fragment)	Metarhizium anisopliae ARSEF 549	646	GO:0016491	oxidoreductase activity [GO:0016491]	PF13434;	NULL	1 out of 5	NULL	KID67926;	NULL
MAN_10001	1816.48	-1.79353	0.0835162	-21.4752	2.65711e-102	3.84337e-101	905.786	808.873	739.135	795.5	2960.4	2913.99	2774.99	2633.16	KID60468.1	160	Chitin synthesis regulation, Congo red resistance, RCR protein, partial	MAN_10001	A0A0B4EQJ2	A0A0B4EQJ2_METAN	unreviewed	Chitin synthesis regulation, Congo red resistance, RCR protein (Fragment)	Metarhizium anisopliae ARSEF 549	160	GO:0016021	integral component of membrane [GO:0016021]	PF12273;	NULL	1 out of 5	NULL	KID60468;	NULL
MAN_08579	1377.04	-2.22615	0.103667	-21.4741	2.72079e-102	3.9299e-101	493.758	514.823	463.376	466.867	2168.37	2393.06	1947.82	2568.21	KID61900.1	249	hypothetical protein MAN_08579, partial	MAN_08579	A0A0B4EIF7	A0A0B4EIF7_METAN	unreviewed	Uncharacterized protein (Fragment)	Metarhizium anisopliae ARSEF 549	249	NULL	NULL	NULL	NULL	1 out of 5	NULL	KID61900;	NULL
MAN_05167	1700.27	-2.98195	0.138927	-21.4642	3.36743e-102	4.85702e-101	429.722	310.021	336.199	449.479	2569.5	3201.84	2843.34	3462.08	KID65508.1	564	Cytochrome P450, partial	MAN_05167	A0A0B4F4X9	A0A0B4F4X9_METAN	unreviewed	Cytochrome P450 (Fragment)	Metarhizium anisopliae ARSEF 549	564	GO:0004497; GO:0005506; GO:0016705; GO:0020037	heme binding [GO:0020037]; iron ion binding [GO:0005506]; monooxygenase activity [GO:0004497]; oxidoreductase activity, acting on paired donors, with incorporation or reduction of molecular oxygen [GO:0016705]	PF00067;	SIGNAL 1 24 {ECO:0000256|SAM:SignalP}.	1 out of 5	NULL	KID65508;	NULL
MAN_02353	2378.02	-1.52404	0.0710631	-21.4463	4.94111e-102	7.11674e-101	1174.57	1292.69	1198.73	1241.5	3327.76	3730.29	3380.05	3678.59	KID69839.1	1172	Vacuolar sorting protein 39/Transforming growth factor beta receptor-associated domain 2, partial	MAN_02353	A0A0B4GNS5	A0A0B4GNS5_METAN	unreviewed	Vacuolar sorting protein 39/Transforming growth factor beta receptor-associated domain 2 (Fragment)	Metarhizium anisopliae ARSEF 549	1172	NULL	NULL	NULL	NULL	1 out of 5	NULL	KID69839;	K20177
MAN_06758	2954.03	-1.88239	0.0878188	-21.4349	6.31284e-102	9.07961e-101	1245.35	1309.6	1230.21	1256.28	4295.8	4924.67	4172.04	5198.28	KID64584.1	387	thymidylate kinase, partial	MAN_06758	A0A0B4G872	A0A0B4G872_METAN	unreviewed	Thymidylate kinase (Fragment)	Metarhizium anisopliae ARSEF 549	387	GO:0016301	kinase activity [GO:0016301]	NULL	NULL	1 out of 5	NULL	KID64584;	NULL
MAN_01902	3654.88	-2.25805	0.105371	-21.4295	7.08618e-102	1.01775e-100	1249.56	1450.52	1162.22	1191.95	6813.11	5546.56	6449.53	5375.61	KID69388.1	359	CRAL/TRIO domain protein, partial	MAN_01902	A0A0B4FG09	A0A0B4FG09_METAN	unreviewed	CRAL/TRIO domain protein (Fragment)	Metarhizium anisopliae ARSEF 549	359	NULL	NULL	PF00650;PF03765;	NULL	1 out of 5	NULL	KID69388;	K19996
MAN_01653	288.458	2.99309	0.139704	21.4244	7.9073e-102	1.13409e-100	484.49	509.186	525.075	531.203	62.4211	71.9635	55.2788	68.0457	KID69139.1	548	major facilitator superfamily protein, partial	MAN_01653	A0A0B4GLK2	A0A0B4GLK2_METAN	unreviewed	Major facilitator superfamily protein (Fragment)	Metarhizium anisopliae ARSEF 549	548	GO:0016021; GO:0055085	integral component of membrane [GO:0016021]; transmembrane transport [GO:0055085]	PF07690;	NULL	1 out of 5	NULL	KID69139;	NULL
MAN_07948	13483.8	1.73756	0.0811916	21.4007	1.31593e-101	1.88469e-100	20822.1	19552.9	21324.1	21286.4	5367.2	6257.6	6528.93	6731.37	KID62732.1	281	ER membrane protein Wsc4, partial	MAN_07948	A0A0B4F4L8	A0A0B4F4L8_METAN	unreviewed	ER membrane protein Wsc4 (Fragment)	Metarhizium anisopliae ARSEF 549	281	GO:0016021	integral component of membrane [GO:0016021]	PF01822;	SIGNAL 1 18 {ECO:0000256|SAM:SignalP}.	1 out of 5	NULL	KID62732;	NULL
MAN_09918	1317.18	-1.84403	0.0861966	-21.3933	1.54271e-101	2.20638e-100	529.147	556.159	611.958	600.755	2137.67	2126.68	1857.37	2117.67	KID60385.1	170	hypothetical protein MAN_09918, partial	MAN_09918	A0A0B4EE03	A0A0B4EE03_METAN	unreviewed	Uncharacterized protein (Fragment)	Metarhizium anisopliae ARSEF 549	170	NULL	NULL	PF12720;	NULL	1 out of 5	NULL	KID60385;	NULL
MAN_08047	4317.3	-2.00482	0.0937317	-21.3889	1.69463e-101	2.42025e-100	1590.81	1711.69	1810.69	1777.92	5811.31	7375.72	7013.37	7446.88	KID62831.1	1165	Mitotic checkpoint serine/threonine protein kinase, Bub1, partial	MAN_08047	A0A0B4FAI1	A0A0B4FAI1_METAN	unreviewed	Mitotic checkpoint serine/threonine protein kinase, Bub1 (Fragment)	Metarhizium anisopliae ARSEF 549	1165	GO:0004674; GO:0005524; GO:0007094	ATP binding [GO:0005524]; protein serine/threonine kinase activity [GO:0004674]; mitotic spindle assembly checkpoint [GO:0007094]	PF08311;PF08171;PF00069;	NULL	1 out of 5	NULL	KID62831;	K02178
MAN_09572	385.784	2.90585	0.135922	21.3788	2.10505e-101	3.0022e-100	642.897	676.41	754.245	649.441	100.283	104.186	78.3954	80.4177	KID60844.1	108	hypothetical protein MAN_09572, partial	MAN_09572	A0A0B4FX55	A0A0B4FX55_METAN	unreviewed	Uncharacterized protein (Fragment)	Metarhizium anisopliae ARSEF 549	108	NULL	NULL	NULL	NULL	1 out of 5	NULL	KID60844;	NULL
MAN_03815	278.496	-5.6324	0.2635	-21.3753	2.26711e-101	3.22881e-100	6.74073	13.1524	12.5917	12.1716	471.74	534.893	507.56	669.116	KID67057.1	427	Nucleoside phosphorylase, partial	MAN_03815	A0A0B4FGU4	A0A0B4FGU4_METAN	unreviewed	Nucleoside phosphorylase (Fragment)	Metarhizium anisopliae ARSEF 549	427	GO:0003824; GO:0009116	catalytic activity [GO:0003824]; nucleoside metabolic process [GO:0009116]	PF01048;	NULL	1 out of 5	NULL	KID67057;	NULL
MAN_01181	2643.39	-2.13246	0.0997806	-21.3715	2.45985e-101	3.49842e-100	915.054	959.187	1084.15	971.988	3973.46	4838.74	3801.17	4603.4	KID71582.1	72	AN1-type zinc finger protein, partial	MAN_01181	A0A0B4FV46	A0A0B4FV46_METAN	unreviewed	AN1-type zinc finger protein (Fragment)	Metarhizium anisopliae ARSEF 549	72	GO:0008270	zinc ion binding [GO:0008270]	PF01428;	NULL	1 out of 5	NULL	KID71582;	K07059
MAN_02962	296.044	-4.32005	0.202306	-21.3541	3.57563e-101	5.0782e-100	39.6018	19.7286	27.7018	25.2126	497.323	538.115	560.828	659.837	KID68106.1	289	transmembrane alpha-helix domain-containing protein, partial	MAN_02962	A0A0B4FQS6	A0A0B4FQS6_METAN	unreviewed	Transmembrane alpha-helix domain-containing protein (Fragment)	Metarhizium anisopliae ARSEF 549	289	GO:0016021	integral component of membrane [GO:0016021]	NULL	NULL	1 out of 5	NULL	KID68106;	NULL
MAN_05417	378.42	-4.35295	0.20394	-21.3442	4.41189e-101	6.25714e-100	32.0185	28.1837	31.4793	48.6863	588.396	680.968	719.629	897.998	KID65758.1	282	hypothetical protein MAN_05417, partial	MAN_05417	A0A0B4F5K5	A0A0B4F5K5_METAN	unreviewed	Uncharacterized protein (Fragment)	Metarhizium anisopliae ARSEF 549	282	NULL	NULL	PF13826;	NULL	1 out of 5	NULL	KID65758;	NULL
MAN_06511	2480.79	1.81274	0.0850197	21.3215	7.17974e-101	1.01685e-99	3932.37	3748.44	3722.12	4044.44	1040.69	1227.68	978.937	1151.62	KID64337.1	274	C6 transcription factor, partial	MAN_06511	A0A0B4F9B5	A0A0B4F9B5_METAN	unreviewed	C6 transcription factor (Fragment)	Metarhizium anisopliae ARSEF 549	274	GO:0003824	catalytic activity [GO:0003824]	NULL	NULL	1 out of 5	NULL	KID64337;	NULL
MAN_05597	2130.79	2.46032	0.115394	21.321	7.24509e-101	1.02468e-99	3610.5	3494.78	3960.1	3359.36	624.211	788.376	534.697	674.271	KID65938.1	295	hypothetical protein MAN_05597, partial	MAN_05597	A0A0B4F638	A0A0B4F638_METAN	unreviewed	Uncharacterized protein (Fragment)	Metarhizium anisopliae ARSEF 549	295	NULL	NULL	NULL	NULL	1 out of 5	NULL	KID65938;	NULL
MAN_02772	6208.49	2.40781	0.112948	21.3178	7.76041e-101	1.09604e-99	9988.92	9909.4	11492.5	10402.4	2381.21	1901.13	1982	1610.42	KID67916.1	426	Glycerol-3-phosphate dehydrogenase, partial	MAN_02772	A0A0B4FQD6	A0A0B4FQD6_METAN	unreviewed	Glycerol-3-phosphate dehydrogenase [NAD(+)] (EC 1.1.1.8) (Fragment)	Metarhizium anisopliae ARSEF 549	426	GO:0004367; GO:0005975; GO:0009331; GO:0046168; GO:0051287	glycerol-3-phosphate dehydrogenase complex [GO:0009331]; glycerol-3-phosphate dehydrogenase [NAD+] activity [GO:0004367]; NAD binding [GO:0051287]; carbohydrate metabolic process [GO:0005975]; glycerol-3-phosphate catabolic process [GO:0046168]	PF07479;PF01210;	NULL	2 out of 5	NULL	KID67916;	K00006
MAN_02548	1011.5	1.91261	0.0897214	21.3172	7.85766e-101	1.10823e-99	1598.4	1616.81	1601.67	1577.09	388.853	435.003	484.443	389.717	KID70034.1	704	SANT SWI3, ADA2, N-coR and TFIIIB\'\' DNA-binding domain-containing protein, partial	MAN_02548	A0A0B4GPH0	A0A0B4GPH0_METAN	unreviewed	SANT SWI3, ADA2, N-coR and TFIIIB'' DNA-binding domain-containing protein (Fragment)	Metarhizium anisopliae ARSEF 549	704	GO:0003677	DNA binding [GO:0003677]	NULL	NULL	1 out of 5	NULL	KID70034;	NULL
MAN_09296	2096.93	-3.45392	0.16215	-21.3008	1.11598e-100	1.57178e-99	331.138	293.111	367.679	411.226	2844.77	3462.84	4271.54	4793.1	KID61012.1	307	phytanoyl-CoA dioxygenase, partial	MAN_09296	A0A0B4EZB0	A0A0B4EZB0_METAN	unreviewed	Phytanoyl-CoA dioxygenase (Fragment)	Metarhizium anisopliae ARSEF 549	307	GO:0051213	dioxygenase activity [GO:0051213]	PF05721;	NULL	1 out of 5	NULL	KID61012;	NULL
MAN_04392	2082.68	-3.40032	0.159666	-21.2964	1.22571e-100	1.72395e-99	317.657	288.414	447.006	391.229	3132.31	4346.81	3262.45	4475.55	KID67634.1	146	hypothetical protein MAN_04392, partial	MAN_04392	A0A0B4GH72	A0A0B4GH72_METAN	unreviewed	Uncharacterized protein (Fragment)	Metarhizium anisopliae ARSEF 549	146	GO:0016021	integral component of membrane [GO:0016021]	NULL	NULL	1 out of 5	NULL	KID67634;	NULL
MAN_08556	2295.53	2.29368	0.107826	21.272	2.06316e-100	2.89781e-99	3847.27	3674.22	3923.58	3808.84	941.434	691.709	809.08	668.085	KID61877.1	482	guanine deaminase, partial	MAN_08556	A0A0B4F208	A0A0B4F208_METAN	unreviewed	Guanine deaminase (Fragment)	Metarhizium anisopliae ARSEF 549	482	GO:0006147; GO:0008270; GO:0008892	guanine deaminase activity [GO:0008892]; zinc ion binding [GO:0008270]; guanine catabolic process [GO:0006147]	PF01979;	NULL	1 out of 5	NULL	KID61877;	K01487
MAN_01781	828.908	-2.71203	0.127648	-21.2461	3.58096e-100	5.02272e-99	218.231	248.017	177.543	231.26	1290.38	1376.97	1399.06	1689.8	KID69267.1	389	Cell wall galactomannoprotein, partial	MAN_01781	A0A0B4FN92	A0A0B4FN92_METAN	unreviewed	Cell wall galactomannoprotein (Fragment)	Metarhizium anisopliae ARSEF 549	389	NULL	NULL	PF12296;	SIGNAL 1 22 {ECO:0000256|SAM:SignalP}.	1 out of 5	NULL	KID69267;	NULL
MAN_00214	262.807	3.88245	0.182768	21.2426	3.8626e-100	5.41029e-99	492.073	449.061	516.261	511.206	36.8387	45.1115	26.1318	25.7749	KID70615.1	824	RAM signaling pathway, SOG2, partial	MAN_00214	A0A0B4F961	A0A0B4F961_METAN	unreviewed	RAM signaling pathway, SOG2 (Fragment)	Metarhizium anisopliae ARSEF 549	824	NULL	NULL	PF13855;PF10428;	NULL	1 out of 5	NULL	KID70615;	NULL
MAN_06410	263.085	3.06	0.144306	21.2049	8.59917e-100	1.20282e-98	461.74	490.397	469.672	457.304	50.1416	64.4449	54.2737	56.7048	KID64236.1	378	choline transport protein, partial	MAN_06410	A0A0B4FEG8	A0A0B4FEG8_METAN	unreviewed	Choline transport protein (Fragment)	Metarhizium anisopliae ARSEF 549	378	GO:0016021	integral component of membrane [GO:0016021]	NULL	NULL	1 out of 5	NULL	KID64236;	NULL
MAN_04368	10260	1.82707	0.0862099	21.1933	1.10012e-99	1.5367e-98	16009.2	16511	15851.7	15660.5	4720.47	5140.56	4215.26	3971.4	KID67610.1	993	dihydrodipicolinate synthase, partial	MAN_04368	A0A0B4F0A3	A0A0B4F0A3_METAN	unreviewed	Dihydrodipicolinate synthase (Fragment)	Metarhizium anisopliae ARSEF 549	993	GO:0032933; GO:0046983	protein dimerization activity [GO:0046983]; SREBP signaling pathway [GO:0032933]	PF09427;PF00010;	NULL	1 out of 5	NULL	KID67610;	NULL
MAN_00348	1072	1.92601	0.0908837	21.192	1.13196e-99	1.57901e-98	1685.18	1631.84	1789.28	1683.16	383.737	488.707	455.296	458.793	KID70749.1	674	Transcription factor, fungi, partial	MAN_00348	A0A0B4GRM3	A0A0B4GRM3_METAN	unreviewed	Transcription factor, fungi (Fragment)	Metarhizium anisopliae ARSEF 549	674	GO:0000981; GO:0003677; GO:0005634; GO:0006351; GO:0008270; GO:0016021	integral component of membrane [GO:0016021]; nucleus [GO:0005634]; DNA binding [GO:0003677]; RNA polymerase II transcription factor activity, sequence-specific DNA binding [GO:0000981]; zinc ion binding [GO:0008270]; transcription, DNA-templated [GO:0006351]	PF04082;PF00172;	NULL	1 out of 5	NULL	KID70749;	NULL
MAN_06331	109.003	10.1634	1.03381	9.831	8.27907e-23	2.96538e-22	230.87	201.983	227.91	211.264	0	0	0	0	KID65320.1	538	cyclohexanone monooxygenase, partial	MAN_06331	A0A0B4ETR5	A0A0B4ETR5_METAN	unreviewed	Cyclohexanone monooxygenase (Fragment)	Metarhizium anisopliae ARSEF 549	538	GO:0004499; GO:0050660; GO:0050661	flavin adenine dinucleotide binding [GO:0050660]; N,N-dimethylaniline monooxygenase activity [GO:0004499]; NADP binding [GO:0050661]	PF00743;	NULL	1 out of 5	NULL	KID65320;	K03379
MAN_07834	524.397	2.9296	0.138356	21.1744	1.64387e-99	2.28682e-98	922.637	950.731	914.16	920.693	97.2133	145.001	144.73	100.007	KID62618.1	2519	Beta-ketoacyl synthase, partial	MAN_07834	A0A0B4EX38	A0A0B4EX38_METAN	unreviewed	Beta-ketoacyl synthase (Fragment)	Metarhizium anisopliae ARSEF 549	2519	GO:0016491; GO:0016740; GO:0031177	oxidoreductase activity [GO:0016491]; phosphopantetheine binding [GO:0031177]; transferase activity [GO:0016740]	PF00698;PF08240;PF16197;PF00109;PF02801;PF08659;PF08242;PF00550;PF14765;	NULL	1 out of 5	NULL	KID62618;	NULL
MAN_06702	1453.69	-1.88257	0.0891071	-21.127	4.48912e-99	6.23639e-98	673.23	595.616	599.366	611.187	2066.04	2225.5	2336.78	2521.82	KID64528.1	948	Amidase signature domain protein, partial	MAN_06702	A0A0B4F281	A0A0B4F281_METAN	unreviewed	Amidase signature domain protein (Fragment)	Metarhizium anisopliae ARSEF 549	948	GO:0004040	amidase activity [GO:0004040]	PF01425;	NULL	1 out of 5	NULL	KID64528;	NULL
MAN_05212	423.853	2.59626	0.122897	21.1255	4.6348e-99	6.42999e-98	746.536	714.927	776.91	671.176	107.446	136.408	108.547	128.875	KID65553.1	306	nucleoside-diphosphate-sugar epimerase family protein, partial	MAN_05212	A0A0B4F540	A0A0B4F540_METAN	unreviewed	Nucleoside-diphosphate-sugar epimerase family protein (Fragment)	Metarhizium anisopliae ARSEF 549	306	NULL	NULL	PF05368;	NULL	1 out of 5	NULL	KID65553;	NULL
MAN_04236	946.006	-2.01914	0.0956115	-21.1181	5.41968e-99	7.50866e-98	362.314	369.207	423.082	346.89	1377.36	1514.46	1546.8	1627.94	KID67478.1	442	Ribonuclease H2, subunit B, partial	MAN_04236	A0A0B4FA89	A0A0B4FA89_METAN	unreviewed	Ribonuclease H2, subunit B (Fragment)	Metarhizium anisopliae ARSEF 549	442	GO:0005634	nucleus [GO:0005634]	PF09468;	NULL	1 out of 5	NULL	KID67478;	NULL
MAN_09246	1309.49	2.37985	0.112703	21.1161	5.662e-99	7.83371e-98	2156.19	2123.17	2285.4	2223.05	327.455	421.04	466.352	473.227	KID61481.1	305	dihydrodipicolinate synthetase, partial	MAN_09246	A0A0B4F6K3	A0A0B4F6K3_METAN	unreviewed	Dihydrodipicolinate synthetase (Fragment)	Metarhizium anisopliae ARSEF 549	305	GO:0008152; GO:0016829	lyase activity [GO:0016829]; metabolic process [GO:0008152]	PF00701;	NULL	1 out of 5	NULL	KID61481;	K01714
MAN_08682	2049.35	-1.43316	0.0679466	-21.0924	9.3324e-99	1.28944e-97	1083.57	1156.47	1120.66	1071.1	3099.57	2934.39	2805.15	3123.92	KID62003.1	860	HbrB-like protein, partial	MAN_08682	A0A0B4EVC5	A0A0B4EVC5_METAN	unreviewed	HbrB-like protein (Fragment)	Metarhizium anisopliae ARSEF 549	860	NULL	NULL	PF08539;	NULL	1 out of 5	NULL	KID62003;	NULL
MAN_03105	1159.68	1.71814	0.0814609	21.0916	9.5006e-99	1.3109e-97	1774.5	1688.21	1942.9	1710.98	553.604	515.56	564.849	526.839	KID68249.1	308	SMP-30/Gluconolaconase/LRE-like region, partial	MAN_03105	A0A0B4GIU6	A0A0B4GIU6_METAN	unreviewed	SMP-30/Gluconolaconase/LRE-like region (Fragment)	Metarhizium anisopliae ARSEF 549	308	NULL	NULL	PF08450;	NULL	1 out of 5	NULL	KID68249;	NULL
MAN_02527	1946.55	1.71624	0.0815172	21.0537	2.11625e-98	2.91607e-97	2982.77	2771.4	3208.37	2977.69	859.57	886.118	1008.08	878.409	KID70013.1	542	inner membrane magnesium transporter MRS2, partial	MAN_02527	A0A0B4FHT4	A0A0B4FHT4_METAN	unreviewed	Inner membrane magnesium transporter MRS2 (Fragment)	Metarhizium anisopliae ARSEF 549	542	GO:0016021; GO:0046873	integral component of membrane [GO:0016021]; metal ion transmembrane transporter activity [GO:0046873]	PF01544;	NULL	1 out of 5	NULL	KID70013;	K16075
MAN_02808	1063.57	1.54556	0.0734139	21.0527	2.16068e-98	2.97326e-97	1557.11	1658.14	1584.04	1538.84	537.231	527.374	574.899	530.963	KID67952.1	160	hypothetical protein MAN_02808, partial	MAN_02808	A0A0B4FJ95	A0A0B4FJ95_METAN	unreviewed	Uncharacterized protein (Fragment)	Metarhizium anisopliae ARSEF 549	160	NULL	NULL	NULL	NULL	1 out of 5	NULL	KID67952;	NULL
MAN_05476	833.528	-2.74005	0.130155	-21.0523	2.18072e-98	2.9968e-97	233.398	223.591	177.543	230.391	1547.23	1648.72	1400.06	1207.3	KID65817.1	331	short-chain dehydrogenase, partial	MAN_05476	A0A0B4FD92	A0A0B4FD92_METAN	unreviewed	Short-chain dehydrogenase (Fragment)	Metarhizium anisopliae ARSEF 549	331	NULL	NULL	PF00106;	NULL	1 out of 5	NULL	KID65817;	NULL
MAN_07441	4699.54	-2.29683	0.109141	-21.0446	2.56453e-98	3.51949e-97	1607.66	1530.38	1693.59	1527.53	9206.61	6327.42	7870.69	7832.48	KID63240.1	300	CFEM domain containing protein, partial	MAN_07441	A0A0B4EMD9	A0A0B4EMD9_METAN	unreviewed	CFEM domain containing protein (Fragment)	Metarhizium anisopliae ARSEF 549	300	NULL	NULL	PF05730;	SIGNAL 1 16 {ECO:0000256|SAM:SignalP}.	1 out of 5	NULL	KID63240;	NULL
MAN_00979	680.788	8.66075	0.411687	21.0372	2.99355e-98	4.10274e-97	1319.5	1475.89	1276.8	1360.61	3.06989	3.22225	0	7.21697	KID71380.1	126	hypothetical protein MAN_00979, partial	MAN_00979	A0A0B4FBA0	A0A0B4FBA0_METAN	unreviewed	Uncharacterized protein (Fragment)	Metarhizium anisopliae ARSEF 549	126	NULL	NULL	NULL	SIGNAL 1 20 {ECO:0000256|SAM:SignalP}.	1 out of 5	NULL	KID71380;	NULL
MAN_04348	908.509	-1.96198	0.0933305	-21.0218	4.14051e-98	5.66705e-97	360.629	379.541	372.715	372.103	1342.57	1343.68	1609.12	1487.73	KID67590.1	691	exo-beta-1,3-glucanase, partial	MAN_04348	A0A0B4F086	A0A0B4F086_METAN	unreviewed	Exo-beta-1,3-glucanase (Fragment)	Metarhizium anisopliae ARSEF 549	691	GO:0004553; GO:0005975; GO:0016021	integral component of membrane [GO:0016021]; hydrolase activity, hydrolyzing O-glycosyl compounds [GO:0004553]; carbohydrate metabolic process [GO:0005975]	PF00150;	NULL	1 out of 5	NULL	KID67590;	K01210
MAN_08454	2182.14	2.45341	0.116753	21.0136	4.92434e-98	6.73081e-97	3798.4	3657.31	3644.05	3661.91	839.104	699.228	584.95	572.203	KID62450.1	146	ankyrin domain containing protein, partial	MAN_08454	A0A0B4EK09	A0A0B4EK09_METAN	unreviewed	Ankyrin domain containing protein (Fragment)	Metarhizium anisopliae ARSEF 549	146	NULL	NULL	NULL	NULL	1 out of 5	NULL	KID62450;	NULL
MAN_00944	1255.86	-2.54181	0.121067	-20.9951	7.26883e-98	9.92205e-97	332.824	370.146	448.266	326.025	2260.46	1844.2	2129.74	2335.21	KID71345.1	809	pyridine nucleotide-disulfide oxidoreductase family protein, partial	MAN_00944	A0A0B4FB63	A0A0B4FB63_METAN	unreviewed	Pyridine nucleotide-disulfide oxidoreductase family protein (Fragment)	Metarhizium anisopliae ARSEF 549	809	NULL	NULL	NULL	SIGNAL 1 21 {ECO:0000256|SAM:SignalP}.	1 out of 5	NULL	KID71345;	NULL
MAN_00243	2678.16	-3.11018	0.148194	-20.9872	8.58934e-98	1.17089e-96	547.684	569.311	469.672	634.661	3770.85	5290.93	4186.11	5956.06	KID70644.1	612	acetylserotonin methytransferase-like protein, partial	MAN_00243	A0A0B4GRB2	A0A0B4GRB2_METAN	unreviewed	Acetylserotonin methytransferase-like protein (Fragment)	Metarhizium anisopliae ARSEF 549	612	GO:0016021; GO:0016740	integral component of membrane [GO:0016021]; transferase activity [GO:0016740]	NULL	NULL	1 out of 5	NULL	KID70644;	NULL
MAN_05197	2044.84	1.79865	0.0857161	20.9838	9.22148e-98	1.25538e-96	3136.97	3370.77	3005.65	3191.56	906.642	1041.86	840.237	865.006	KID65538.1	536	GATA transcription factor, partial	MAN_05197	A0A0B4F531	A0A0B4F531_METAN	unreviewed	GATA transcription factor (Fragment)	Metarhizium anisopliae ARSEF 549	536	GO:0003700; GO:0008270; GO:0043565	sequence-specific DNA binding [GO:0043565]; transcription factor activity, sequence-specific DNA binding [GO:0003700]; zinc ion binding [GO:0008270]	PF00320;	NULL	1 out of 5	NULL	KID65538;	NULL
MAN_10423	3174.92	-1.51272	0.0721328	-20.9713	1.19881e-97	1.62984e-96	1551.21	1542.59	1832.1	1670.98	4597.68	4782.89	4771.06	4650.82	KID59782.1	1176	SNF2-related protein, partial	MAN_10423	A0A0B4EVK6	A0A0B4EVK6_METAN	unreviewed	SNF2-related protein (Fragment)	Metarhizium anisopliae ARSEF 549	1176	GO:0005524	ATP binding [GO:0005524]	PF00271;PF00176;	NULL	1 out of 5	NULL	KID59782;	NULL
MAN_01582	320.189	-6.86346	0.327455	-20.96	1.51999e-97	2.06374e-96	8.42591	7.51566	0	4.34699	653.887	683.116	558.818	645.404	KID69068.1	256	hypothetical protein MAN_01582, partial	MAN_01582	A0A0B4FF62	A0A0B4FF62_METAN	unreviewed	Uncharacterized protein (Fragment)	Metarhizium anisopliae ARSEF 549	256	NULL	NULL	PF12697;	NULL	1 out of 5	NULL	KID69068;	NULL
MAN_09369	227.297	3.78278	0.180507	20.9565	1.63732e-97	2.22009e-96	405.286	423.696	467.153	399.054	31.7222	36.5188	28.1419	26.8059	KID61085.1	345	choline transport protein, partial	MAN_09369	A0A0B4EG30	A0A0B4EG30_METAN	unreviewed	Choline transport protein (Fragment)	Metarhizium anisopliae ARSEF 549	345	GO:0016021	integral component of membrane [GO:0016021]	NULL	NULL	1 out of 5	NULL	KID61085;	NULL
MAN_09375	589.629	-3.70292	0.176867	-20.9362	2.50811e-97	3.39629e-96	69.9351	71.3988	89.4013	106.067	1232.05	1180.42	815.111	1152.65	KID61091.1	579	major facilitator superfamily transporter, partial	MAN_09375	A0A0B4F5G5	A0A0B4F5G5_METAN	unreviewed	Major facilitator superfamily transporter (Fragment)	Metarhizium anisopliae ARSEF 549	579	GO:0016021; GO:0055085	integral component of membrane [GO:0016021]; transmembrane transport [GO:0055085]	PF07690;	NULL	1 out of 5	NULL	KID61091;	NULL
MAN_00636	653.316	-3.67059	0.17573	-20.8877	6.9304e-97	9.37214e-96	86.7869	84.5512	89.4013	119.108	918.921	1177.19	1523.68	1226.89	KID71037.1	313	glucan endo-1,3-beta-glucosidase A1-like protein, partial	MAN_00636	A0A0B4FTM0	A0A0B4FTM0_METAN	unreviewed	Glucan endo-1,3-beta-glucosidase A1-like protein (Fragment)	Metarhizium anisopliae ARSEF 549	313	GO:0004553; GO:0005975	hydrolase activity, hydrolyzing O-glycosyl compounds [GO:0004553]; carbohydrate metabolic process [GO:0005975]	PF00722;	SIGNAL 1 18 {ECO:0000256|SAM:SignalP}.	1 out of 5	NULL	KID71037;	NULL
MAN_02247	5612.28	1.28062	0.0613296	20.8809	7.98209e-97	1.07801e-95	8318.06	8205.23	7567.63	7713.31	3363.58	3401.62	3136.82	3191.96	KID69733.1	610	phenylalanyl-tRNA synthetase, beta subunit, partial	MAN_02247	A0A0B4FGY3	A0A0B4FGY3_METAN	unreviewed	Phenylalanyl-tRNA synthetase, beta subunit (Fragment)	Metarhizium anisopliae ARSEF 549	610	GO:0000287; GO:0003723; GO:0004826; GO:0005524; GO:0005737; GO:0006432	cytoplasm [GO:0005737]; ATP binding [GO:0005524]; magnesium ion binding [GO:0000287]; phenylalanine-tRNA ligase activity [GO:0004826]; RNA binding [GO:0003723]; phenylalanyl-tRNA aminoacylation [GO:0006432]	PF03483;PF03484;	NULL	1 out of 5	NULL	KID69733;	K01890
MAN_06909	26261.4	-1.96837	0.0942858	-20.8767	8.72728e-97	1.17708e-95	10716.1	10831.9	10293.7	10917	38409.5	40296.3	50326.8	38299.4	KID63738.1	586	beta-glucosidase, partial	MAN_06909	A0A0B4F043	A0A0B4F043_METAN	unreviewed	Beta-glucosidase (Fragment)	Metarhizium anisopliae ARSEF 549	586	NULL	NULL	NULL	SIGNAL 1 19 {ECO:0000256|SAM:SignalP}.	1 out of 5	NULL	KID63738;	NULL
MAN_03812	3771.89	2.50477	0.0980513	25.5455	6.16321e-144	1.39777e-142	6923.57	7119.21	5772.05	5839.75	1245.35	1046.16	1078.44	1150.59	KID67054.1	355	Alcohol dehydrogenase superfamily, zinc-type, partial	MAN_03812	A0A0B4GFT6	A0A0B4GFT6_METAN	unreviewed	Alcohol dehydrogenase superfamily, zinc-type (Fragment)	Metarhizium anisopliae ARSEF 549	355	GO:0008270; GO:0016491	oxidoreductase activity [GO:0016491]; zinc ion binding [GO:0008270]	PF08240;PF00107;	NULL	1 out of 5	NULL	KID67054;	NULL
MAN_07528	530.475	-2.68066	0.128834	-20.807	3.73773e-96	5.02791e-95	173.574	132.464	120.881	142.581	981.342	968.822	827.172	896.967	KID63327.1	350	oxidoreductase, partial	MAN_07528	A0A0B4F6A2	A0A0B4F6A2_METAN	unreviewed	Oxidoreductase (Fragment)	Metarhizium anisopliae ARSEF 549	350	GO:0016491; GO:0046872	metal ion binding [GO:0046872]; oxidoreductase activity [GO:0016491]	PF03171;PF14226;	NULL	1 out of 5	NULL	KID63327;	NULL
MAN_09896	1826.36	-1.84346	0.0886043	-20.8056	3.85333e-96	5.17657e-95	783.61	767.537	841.128	793.761	2565.41	2874.24	3228.28	2756.88	KID60363.1	1158	kinesin protein 2, partial	MAN_09896	A0A0B4EQ56	A0A0B4EQ56_METAN	unreviewed	Kinesin protein 2 (Fragment)	Metarhizium anisopliae ARSEF 549	1158	GO:0003777; GO:0005524; GO:0007018; GO:0008017	ATP binding [GO:0005524]; microtubule binding [GO:0008017]; microtubule motor activity [GO:0003777]; microtubule-based movement [GO:0007018]	PF00225;PF13931;	NULL	1 out of 5	NULL	KID60363;	K10398
MAN_05027	3614.66	-2.29959	0.110629	-20.7865	5.7296e-96	7.68703e-95	1177.94	1258.87	1154.66	1289.32	4717.4	6559.42	6272.63	6487.03	KID66746.1	1117	intracellular protein transport-like protein, partial	MAN_05027	A0A0B4FLV0	A0A0B4FLV0_METAN	unreviewed	Intracellular protein transport-like protein (Fragment)	Metarhizium anisopliae ARSEF 549	1117	NULL	NULL	NULL	NULL	1 out of 5	NULL	KID66746;	NULL
MAN_05210	6817.78	-1.26317	0.0607969	-20.7769	6.99906e-96	9.37782e-95	4080.67	4056.58	3855.59	4045.31	9069.49	9295.11	10150.2	9989.32	KID65551.1	457	Carbamoyl-phosphate synthase, partial	MAN_05210	A0A0B4FIB9	A0A0B4FIB9_METAN	unreviewed	Carbamoyl-phosphate synthase (Fragment)	Metarhizium anisopliae ARSEF 549	457	GO:0004088; GO:0006207; GO:0006541	carbamoyl-phosphate synthase (glutamine-hydrolyzing) activity [GO:0004088]; 'de novo' pyrimidine nucleobase biosynthetic process [GO:0006207]; glutamine metabolic process [GO:0006541]	PF00988;PF00117;	NULL	1 out of 5	NULL	KID65551;	K01956
MAN_00083	6129.47	2.06217	0.0994196	20.7421	1.4444e-95	1.93277e-94	9644.3	10370.7	9458.91	10088.5	2856.02	2219.05	2315.68	2082.61	KID70484.1	1313	Transcription factor, fungi, partial	MAN_00083	A0A0B4GQS3	A0A0B4GQS3_METAN	unreviewed	Transcription factor, fungi (Fragment)	Metarhizium anisopliae ARSEF 549	1313	GO:0000981; GO:0003677; GO:0005634; GO:0006351; GO:0008270	nucleus [GO:0005634]; DNA binding [GO:0003677]; RNA polymerase II transcription factor activity, sequence-specific DNA binding [GO:0000981]; zinc ion binding [GO:0008270]; transcription, DNA-templated [GO:0006351]	PF04082;PF00172;	NULL	1 out of 5	NULL	KID70484;	NULL
MAN_00752	1118.09	1.66482	0.0802907	20.7349	1.67949e-95	2.24439e-94	1638	1627.14	1782.99	1752.71	539.278	552.078	562.838	489.723	KID71153.1	257	Peptidase S24/S26A/S26B/S26C, partial	MAN_00752	A0A0B4FL36	A0A0B4FL36_METAN	unreviewed	Peptidase S24/S26A/S26B/S26C (Fragment)	Metarhizium anisopliae ARSEF 549	257	GO:0008236; GO:0016020	membrane [GO:0016020]; serine-type peptidase activity [GO:0008236]	NULL	NULL	1 out of 5	NULL	KID71153;	K09648
MAN_00614	1187.86	2.24077	0.1081	20.7287	1.91049e-95	2.54974e-94	1892.46	1972.86	2032.31	1945.71	434.901	413.522	331.673	479.413	KID71015.1	254	acetyltransferase, partial	MAN_00614	A0A0B4FA92	A0A0B4FA92_METAN	unreviewed	Acetyltransferase (Fragment)	Metarhizium anisopliae ARSEF 549	254	GO:0008080	N-acetyltransferase activity [GO:0008080]	PF13508;	NULL	1 out of 5	NULL	KID71015;	NULL
MAN_00662	664.482	-1.72023	0.0830535	-20.7124	2.6804e-95	3.57258e-94	295.75	312.839	329.903	301.681	1023.3	1041.86	996.023	1014.5	KID71063.1	237	serine/threonine protein phosphatase, partial	MAN_00662	A0A0B4FKW6	A0A0B4FKW6_METAN	unreviewed	Serine/threonine protein phosphatase (Fragment)	Metarhizium anisopliae ARSEF 549	237	NULL	NULL	NULL	NULL	1 out of 5	NULL	KID71063;	NULL
MAN_05867	1641.18	-2.10741	0.101789	-20.7038	3.20096e-95	4.26084e-94	651.323	709.291	506.188	601.624	2545.96	2680.91	2646.35	2787.81	KID64856.1	269	hypothetical protein MAN_05867, partial	MAN_05867	A0A0B4FG96	A0A0B4FG96_METAN	unreviewed	Uncharacterized protein (Fragment)	Metarhizium anisopliae ARSEF 549	269	NULL	NULL	NULL	NULL	1 out of 5	NULL	KID64856;	NULL
MAN_04182	448.036	-2.59905	0.125564	-20.6989	3.54278e-95	4.70967e-94	129.759	124.948	130.954	122.585	685.609	712.117	805.06	873.254	KID67424.1	252	hypothetical protein MAN_04182, partial	MAN_04182	A0A0B4GGL8	A0A0B4GGL8_METAN	unreviewed	Uncharacterized protein (Fragment)	Metarhizium anisopliae ARSEF 549	252	GO:0003700	transcription factor activity, sequence-specific DNA binding [GO:0003700]	NULL	NULL	1 out of 5	NULL	KID67424;	NULL
MAN_02758	757.828	-3.89091	0.18805	-20.6908	4.18971e-95	5.56243e-94	64.0369	83.6118	109.548	126.932	1401.92	1458.6	1148.79	1669.18	KID70244.1	440	WD40/YVTN repeat-like-containing domain protein, partial	MAN_02758	A0A0B4GQ15	A0A0B4GQ15_METAN	unreviewed	WD40/YVTN repeat-like-containing domain protein (Fragment)	Metarhizium anisopliae ARSEF 549	440	NULL	NULL	PF00400;	NULL	1 out of 5	NULL	KID70244;	NULL
MAN_01096	3062.65	1.93081	0.0933456	20.6845	4.77868e-95	6.33611e-94	4980.56	4900.21	4351.7	5177.27	1163.49	1156.79	1404.08	1367.1	KID71497.1	334	hypothetical protein MAN_01096, partial	MAN_01096	A0A0B4FUV0	A0A0B4FUV0_METAN	unreviewed	Uncharacterized protein (Fragment)	Metarhizium anisopliae ARSEF 549	334	GO:0016491	oxidoreductase activity [GO:0016491]	PF08240;PF00107;	NULL	1 out of 5	NULL	KID71497;	NULL
MAN_09959	3948.91	1.80446	0.0872552	20.6802	5.22001e-95	6.91227e-94	6318.59	6421.19	5789.68	6029.28	1897.19	1893.61	1507.6	1734.14	KID60426.1	858	histidine biosynthesis trifunctional protein, partial	MAN_09959	A0A0B4F3H9	A0A0B4F3H9_METAN	unreviewed	Histidine biosynthesis trifunctional protein (Fragment)	Metarhizium anisopliae ARSEF 549	858	GO:0000105; GO:0004399; GO:0004635; GO:0004636; GO:0008270; GO:0051287	histidinol dehydrogenase activity [GO:0004399]; NAD binding [GO:0051287]; phosphoribosyl-AMP cyclohydrolase activity [GO:0004635]; phosphoribosyl-ATP diphosphatase activity [GO:0004636]; zinc ion binding [GO:0008270]; histidine biosynthetic process [GO:0000105]	PF00815;PF01502;PF01503;	NULL	1 out of 5	NULL	KID60426;	K14152
MAN_09182	336.283	-5.3558	0.259007	-20.6782	5.44685e-95	7.20328e-94	12.6389	16.9102	8.81421	24.3432	478.903	656.264	698.523	793.867	KID61417.1	260	Protein kinase-like domain protein, partial	MAN_09182	A0A0B4F0P2	A0A0B4F0P2_METAN	unreviewed	Protein kinase-like domain protein (Fragment)	Metarhizium anisopliae ARSEF 549	260	GO:0016301	kinase activity [GO:0016301]	PF01636;	NULL	1 out of 5	NULL	KID61417;	NULL
MAN_01985	1573.61	2.32002	0.112228	20.6724	6.13667e-95	8.10502e-94	2745.16	2842.8	2510.79	2389.98	480.95	447.892	554.798	616.536	KID69471.1	538	allantoinase, partial	MAN_01985	A0A0B4FUU3	A0A0B4FUU3_METAN	unreviewed	Allantoinase (Fragment)	Metarhizium anisopliae ARSEF 549	538	GO:0016812; GO:0016888	endodeoxyribonuclease activity, producing 5'-phosphomonoesters [GO:0016888]; hydrolase activity, acting on carbon-nitrogen (but not peptide) bonds, in cyclic amides [GO:0016812]	PF01979;	NULL	1 out of 5	NULL	KID69471;	K01466
MAN_01918	514.285	-3.31792	0.160528	-20.6688	6.61663e-95	8.72762e-94	101.954	83.6118	103.252	86.9399	1176.79	934.452	784.959	842.324	KID69404.1	1238	acetyl-/propionyl-coenzyme A carboxylase alpha chain, partial	MAN_01918	A0A0B4GMF5	A0A0B4GMF5_METAN	unreviewed	Acetyl-/propionyl-coenzyme A carboxylase alpha chain (Fragment)	Metarhizium anisopliae ARSEF 549	1238	GO:0004075; GO:0005524; GO:0046872	ATP binding [GO:0005524]; biotin carboxylase activity [GO:0004075]; metal ion binding [GO:0046872]	PF02785;PF00289;PF00364;PF02786;PF02626;PF02682;	NULL	1 out of 5	NULL	KID69404;	K01941
MAN_05575	301.471	-3.46719	0.167855	-20.6559	8.64124e-95	1.13834e-93	59.824	33.8205	60.4403	46.9475	552.581	591.819	508.565	557.769	KID65916.1	480	endothelin-converting enzyme, partial	MAN_05575	A0A0B4FJ91	A0A0B4FJ91_METAN	unreviewed	Endothelin-converting enzyme (Fragment)	Metarhizium anisopliae ARSEF 549	480	NULL	NULL	NULL	NULL	1 out of 5	NULL	KID65916;	NULL
MAN_00736	7884.09	-2.53349	0.122771	-20.636	1.30547e-94	1.71753e-93	2291.85	2096.87	2451.61	2449.97	10908.4	13950.2	12338.2	16585.6	KID71137.1	360	Glycoside hydrolase, family 61, partial	MAN_00736	A0A0B4FTU7	A0A0B4FTU7_METAN	unreviewed	Glycoside hydrolase, family 61 (Fragment)	Metarhizium anisopliae ARSEF 549	360	GO:0016787	hydrolase activity [GO:0016787]	PF03443;	SIGNAL 1 16 {ECO:0000256|SAM:SignalP}.	1 out of 5	NULL	KID71137;	NULL
MAN_01945	1759.95	-1.44414	0.069983	-20.6355	1.31732e-94	1.73087e-93	902.415	963.884	943.121	974.596	2396.56	2648.69	2697.6	2552.75	KID69431.1	811	hypothetical protein MAN_01945, partial	MAN_01945	A0A0B4FUQ2	A0A0B4FUQ2_METAN	unreviewed	Uncharacterized protein (Fragment)	Metarhizium anisopliae ARSEF 549	811	NULL	NULL	NULL	NULL	1 out of 5	NULL	KID69431;	NULL
MAN_01844	313.329	2.87856	0.139497	20.6353	1.32236e-94	1.73526e-93	551.897	507.307	620.772	526.856	76.7473	80.5562	71.3599	71.1387	KID69330.1	330	NAD(P)-binding domain protein, partial	MAN_01844	A0A0B4F5D3	A0A0B4F5D3_METAN	unreviewed	NAD(P)-binding domain protein (Fragment)	Metarhizium anisopliae ARSEF 549	330	NULL	NULL	PF13460;	NULL	1 out of 5	NULL	KID69330;	NULL
MAN_10186	4171.33	-1.30188	0.0631864	-20.6038	2.53735e-94	3.32534e-93	2361.78	2421.92	2377.32	2467.35	5564.69	6375.75	5794.22	6007.61	KID60156.1	635	Protein kinase, catalytic domain protein, partial	MAN_10186	A0A0B4F2U0	A0A0B4F2U0_METAN	unreviewed	Protein kinase, catalytic domain protein (Fragment)	Metarhizium anisopliae ARSEF 549	635	GO:0004674; GO:0005524	ATP binding [GO:0005524]; protein serine/threonine kinase activity [GO:0004674]	PF00069;	NULL	1 out of 5	NULL	KID60156;	K08286
MAN_05545	1829.32	3.43363	0.166856	20.5784	4.28466e-94	5.60806e-93	3607.98	3278.71	3214.67	3293.28	431.832	334.04	247.247	226.819	KID65886.1	321	lysophospholipase-like protein, partial	MAN_05545	A0A0B4FJ63	A0A0B4FJ63_METAN	unreviewed	Lysophospholipase-like protein (Fragment)	Metarhizium anisopliae ARSEF 549	321	NULL	NULL	PF12697;	NULL	1 out of 5	NULL	KID65886;	NULL
MAN_04699	670.278	-2.00609	0.0975097	-20.5732	4.77265e-94	6.23876e-93	256.99	291.232	264.426	256.473	972.133	1074.08	1105.58	1141.31	KID66418.1	760	DNA polymerase alpha/epsilon, subunit B, partial	MAN_04699	A0A0B4F7E4	A0A0B4F7E4_METAN	unreviewed	DNA polymerase alpha/epsilon, subunit B (Fragment)	Metarhizium anisopliae ARSEF 549	760	GO:0003677; GO:0003887; GO:0006260	DNA binding [GO:0003677]; DNA-directed DNA polymerase activity [GO:0003887]; DNA replication [GO:0006260]	PF04042;	NULL	1 out of 5	NULL	KID66418;	K02325
MAN_08449	2981.41	-1.73529	0.0844119	-20.5574	6.60177e-94	8.6187e-93	1279.05	1412.94	1427.9	1391.04	4018.49	4807.59	4946.95	4567.31	KID62445.1	673	kinesin, partial	MAN_08449	A0A0B4EK03	A0A0B4EK03_METAN	unreviewed	Kinesin (Fragment)	Metarhizium anisopliae ARSEF 549	673	GO:0003777; GO:0005524; GO:0007018; GO:0008017	ATP binding [GO:0005524]; microtubule binding [GO:0008017]; microtubule motor activity [GO:0003777]; microtubule-based movement [GO:0007018]	PF00225;	NULL	1 out of 5	NULL	KID62445;	NULL
MAN_04873	2281.25	1.47557	0.0717847	20.5555	6.87376e-94	8.96229e-93	3181.62	3349.17	3559.68	3334.14	1280.15	1156.79	1134.72	1253.69	KID66592.1	772	cystathionine beta-lyase, partial	MAN_04873	A0A0B4FFG4	A0A0B4FFG4_METAN	unreviewed	Cystathionine beta-lyase (Fragment)	Metarhizium anisopliae ARSEF 549	772	GO:0005975; GO:0016021; GO:0016810; GO:0016829; GO:0030170	integral component of membrane [GO:0016021]; hydrolase activity, acting on carbon-nitrogen (but not peptide) bonds [GO:0016810]; lyase activity [GO:0016829]; pyridoxal phosphate binding [GO:0030170]; carbohydrate metabolic process [GO:0005975]	PF01053;PF01522;	NULL	1 out of 5	NULL	KID66592;	NULL
MAN_01332	12161.3	-1.17233	0.0570747	-20.5403	9.39195e-94	1.223e-92	7489.79	7556.06	7208.77	7643.75	16264.3	16545.2	18101.3	16481.5	KID71733.1	291	allergen Asp F4-like protein, partial	MAN_01332	A0A0B4FMU2	A0A0B4FMU2_METAN	unreviewed	Allergen Asp F4-like protein (Fragment)	Metarhizium anisopliae ARSEF 549	291	NULL	NULL	NULL	SIGNAL 1 24 {ECO:0000256|SAM:SignalP}.	1 out of 5	NULL	KID71733;	NULL
MAN_03636	4882.93	-3.0843	0.150167	-20.5392	9.62114e-94	1.25124e-92	1011.95	946.034	1067.78	1094.57	6273.84	9404.67	8055.63	11209	KID68780.1	547	aspartyl protease, partial	MAN_03636	A0A0B4F3Q9	A0A0B4F3Q9_METAN	unreviewed	Aspartyl protease (Fragment)	Metarhizium anisopliae ARSEF 549	547	GO:0004190	aspartic-type endopeptidase activity [GO:0004190]	PF00026;	SIGNAL 1 21 {ECO:0000256|SAM:SignalP}.	1 out of 5	NULL	KID68780;	NULL
MAN_01534	386.174	2.36355	0.115269	20.5047	1.95467e-93	2.53882e-92	663.119	681.107	588.034	653.788	119.726	133.186	123.623	126.813	KID71935.1	376	Aldolase-type TIM barrel, partial	MAN_01534	A0A0B4FD59	A0A0B4FD59_METAN	unreviewed	Aldolase-type TIM barrel (Fragment)	Metarhizium anisopliae ARSEF 549	376	GO:0010181; GO:0016491	FMN binding [GO:0010181]; oxidoreductase activity [GO:0016491]	PF00724;	NULL	1 out of 5	NULL	KID71935;	K00354
MAN_10292	4039.37	-1.84492	0.0900164	-20.4953	2.36912e-93	3.07321e-92	1766.07	1687.27	1689.81	1891.81	5406.08	6530.42	6942.01	6401.45	KID59840.1	1051	galactose oxidase, partial	MAN_10292	A0A0B4ECB4	A0A0B4ECB4_METAN	unreviewed	Galactose oxidase (Fragment)	Metarhizium anisopliae ARSEF 549	1051	GO:0016021	integral component of membrane [GO:0016021]	NULL	NULL	1 out of 5	NULL	KID59840;	NULL
MAN_01153	4544.21	1.73102	0.0844861	20.4888	2.71163e-93	3.51304e-92	7202.47	7225.37	6973.3	6536.14	1808.17	2285.65	2132.76	2189.84	KID71554.1	382	delta-aminolevulinic acid dehydratase, partial	MAN_01153	A0A0B4GU83	A0A0B4GU83_METAN	unreviewed	Delta-aminolevulinic acid dehydratase (EC 4.2.1.24) (Fragment)	Metarhizium anisopliae ARSEF 549	382	GO:0004655; GO:0006779; GO:0046872	metal ion binding [GO:0046872]; porphobilinogen synthase activity [GO:0004655]; porphyrin-containing compound biosynthetic process [GO:0006779]	PF00490;	NULL	2 out of 5	NULL	KID71554;	K01698
MAN_06771	336.089	3.2028	0.156383	20.4805	3.21519e-93	4.16014e-92	618.462	558.038	613.217	635.53	74.7007	59.0745	48.2433	81.4487	KID64597.1	1308	cholesterol oxidase precursor, partial	MAN_06771	A0A0B4FA55	A0A0B4FA55_METAN	unreviewed	Cholesterol oxidase (Fragment)	Metarhizium anisopliae ARSEF 549	1308	GO:0016614; GO:0050660	flavin adenine dinucleotide binding [GO:0050660]; oxidoreductase activity, acting on CH-OH group of donors [GO:0016614]	PF05199;PF00732;	NULL	1 out of 5	NULL	KID64597;	NULL
MAN_00400	1896.09	1.73196	0.0846623	20.4573	5.16929e-93	6.68006e-92	2705.56	2889.77	3034.61	3028.99	820.685	986.008	883.455	819.642	KID70801.1	717	hypothetical protein MAN_00400, partial	MAN_00400	A0A0B4FYQ6	A0A0B4FYQ6_METAN	unreviewed	Uncharacterized protein (Fragment)	Metarhizium anisopliae ARSEF 549	717	NULL	NULL	NULL	NULL	1 out of 5	NULL	KID70801;	NULL
MAN_07155	382.095	-2.56752	0.125515	-20.4559	5.32835e-93	6.87688e-92	119.648	111.795	99.4747	108.675	575.093	692.783	690.482	658.807	KID63984.1	177	Mpv17/PMP22, partial	MAN_07155	A0A0B4G6F2	A0A0B4G6F2_METAN	unreviewed	Mpv17/PMP22 (Fragment)	Metarhizium anisopliae ARSEF 549	177	GO:0016021	integral component of membrane [GO:0016021]	PF04117;	NULL	1 out of 5	NULL	KID63984;	NULL
MAN_08897	453.337	2.46	0.120405	20.4311	8.85175e-93	1.14098e-91	794.563	805.115	740.394	728.556	119.726	155.742	155.786	126.813	KID61658.1	500	Alcohol acetyltransferase, partial	MAN_08897	A0A0B4EUB0	A0A0B4EUB0_METAN	unreviewed	Alcohol acetyltransferase (Fragment)	Metarhizium anisopliae ARSEF 549	500	GO:0016740	transferase activity [GO:0016740]	PF07247;	NULL	1 out of 5	NULL	KID61658;	NULL
MAN_10396	271.293	-4.06937	0.199176	-20.431	8.87251e-93	1.14221e-91	46.3425	25.3654	26.4426	22.6044	532.115	476.893	547.762	492.816	KID59755.1	579	phosphotransferase family protein, partial	MAN_10396	A0A0B4EC14	A0A0B4EC14_METAN	unreviewed	Phosphotransferase family protein (Fragment)	Metarhizium anisopliae ARSEF 549	579	GO:0016740	transferase activity [GO:0016740]	PF01636;	NULL	1 out of 5	NULL	KID59755;	NULL
MAN_06820	6873.47	-1.19892	0.0587152	-20.4193	1.12691e-92	1.44891e-91	4379.79	4228.5	3960.1	4112.26	9081.77	9672.11	9615.49	9937.77	KID64646.1	513	S-adenosylmethionine decarboxylase, partial	MAN_06820	A0A0B4FFQ4	A0A0B4FFQ4_METAN	unreviewed	S-adenosylmethionine decarboxylase (Fragment)	Metarhizium anisopliae ARSEF 549	513	GO:0004014; GO:0006597; GO:0008295	adenosylmethionine decarboxylase activity [GO:0004014]; spermidine biosynthetic process [GO:0008295]; spermine biosynthetic process [GO:0006597]	PF01536;	NULL	1 out of 5	NULL	KID64646;	K01611
MAN_10656	587.956	4.45963	0.218546	20.4059	1.48256e-92	1.90377e-91	1116.43	1069.1	1155.92	1157.17	63.4444	78.408	29.147	34.0229	KID59486.1	150	hypothetical protein MAN_10656, partial	MAN_10656	A0A0B4F0W9	A0A0B4F0W9_METAN	unreviewed	Uncharacterized protein (Fragment)	Metarhizium anisopliae ARSEF 549	150	NULL	NULL	NULL	SIGNAL 1 19 {ECO:0000256|SAM:SignalP}.	1 out of 5	NULL	KID59486;	NULL
MAN_03856	2572.23	1.3106	0.0643608	20.3633	3.53599e-92	4.53488e-91	3760.48	3673.28	3762.41	3469.77	1440.8	1539.16	1528.71	1403.19	KID67098.1	495	Zn(2)-C6 fungal-type DNA-binding domain protein, partial	MAN_03856	A0A0B4F982	A0A0B4F982_METAN	unreviewed	Zn(2)-C6 fungal-type DNA-binding domain protein (Fragment)	Metarhizium anisopliae ARSEF 549	495	GO:0000981; GO:0003677; GO:0005634; GO:0008270	nucleus [GO:0005634]; DNA binding [GO:0003677]; RNA polymerase II transcription factor activity, sequence-specific DNA binding [GO:0000981]; zinc ion binding [GO:0008270]	PF00172;	NULL	1 out of 5	NULL	KID67098;	NULL
MAN_09981	11710.4	1.68646	0.0828244	20.3619	3.64269e-92	4.66585e-91	18597.7	19565.2	17109.6	16203	5669.07	5642.15	5006.25	5890.08	KID60448.1	276	argininosuccinate synthase, partial	MAN_09981	A0A0B4EQG4	A0A0B4EQG4_METAN	unreviewed	Argininosuccinate synthase (Fragment)	Metarhizium anisopliae ARSEF 549	276	GO:0004055; GO:0005524; GO:0006526	argininosuccinate synthase activity [GO:0004055]; ATP binding [GO:0005524]; arginine biosynthetic process [GO:0006526]	PF00764;	NULL	1 out of 5	NULL	KID60448;	K01940
MAN_10490	1298.83	-4.29248	0.210838	-20.3591	3.85239e-92	4.92826e-91	86.7869	98.6431	125.917	193.007	2970.63	2353.31	2590.06	1972.3	KID59684.1	445	hypothetical protein MAN_10490, partial	MAN_10490	A0A0B4FTW1	A0A0B4FTW1_METAN	unreviewed	Uncharacterized protein (Fragment)	Metarhizium anisopliae ARSEF 549	445	GO:0016021	integral component of membrane [GO:0016021]	PF12505;	NULL	1 out of 5	NULL	KID59684;	NULL
MAN_02688	189.925	-3.987	0.195953	-20.3467	4.96486e-92	6.34344e-91	26.9629	19.7286	18.8876	23.4738	343.828	345.855	383.936	356.725	KID70174.1	635	arginine deiminase type-3, partial	MAN_02688	A0A0B4GPU1	A0A0B4GPU1_METAN	unreviewed	Arginine deiminase type-3 (Fragment)	Metarhizium anisopliae ARSEF 549	635	GO:0004668; GO:0005509; GO:0005737; GO:0018101	cytoplasm [GO:0005737]; calcium ion binding [GO:0005509]; protein-arginine deiminase activity [GO:0004668]; protein citrullination [GO:0018101]	PF03068;	SIGNAL 1 21 {ECO:0000256|SAM:SignalP}.	1 out of 5	NULL	KID70174;	K01481
MAN_05617	27936.8	-2.65955	0.130755	-20.34	5.69705e-92	7.26981e-91	7941.42	7831.32	7017.37	7747.21	63413.7	39347.9	44895.4	45299.9	KID65958.1	151	16 kDa allergen, partial	MAN_05617	A0A0B4F656	A0A0B4F656_METAN	unreviewed	16 kDa allergen (Fragment)	Metarhizium anisopliae ARSEF 549	151	NULL	NULL	NULL	SIGNAL 1 17 {ECO:0000256|SAM:SignalP}.	1 out of 5	NULL	KID65958;	NULL
MAN_03948	4256.63	1.05707	0.0520206	20.3201	8.53289e-92	1.08749e-90	5757.43	5661.17	5863.97	5718.04	2667.74	2721.72	2887.56	2775.44	KID67190.1	122	Histone chaperone domain CHZ, partial	MAN_03948	A0A0B4EZA1	A0A0B4EZA1_METAN	unreviewed	Histone chaperone domain CHZ (Fragment)	Metarhizium anisopliae ARSEF 549	122	NULL	NULL	PF09649;	NULL	1 out of 5	NULL	KID67190;	NULL
MAN_08229	1095.01	1.70534	0.0839472	20.3145	9.57975e-92	1.21938e-90	1736.58	1734.24	1556.34	1676.2	555.651	513.411	519.621	468.072	KID62225.1	825	WD domain, G-beta repeat containing protein, partial	MAN_08229	A0A0B4EJB1	A0A0B4EJB1_METAN	unreviewed	WD domain, G-beta repeat containing protein (Fragment)	Metarhizium anisopliae ARSEF 549	825	NULL	NULL	PF00400;	NULL	1 out of 5	NULL	KID62225;	K20241
MAN_01413	1983.48	-1.92442	0.0947372	-20.3133	9.81316e-92	1.24753e-90	796.249	868.999	878.903	766.81	2757.79	3470.36	3019.23	3309.5	KID71814.1	849	WD40 repeat-like-containing domain protein, partial	MAN_01413	A0A0B4GUZ7	A0A0B4GUZ7_METAN	unreviewed	WD40 repeat-like-containing domain protein (Fragment)	Metarhizium anisopliae ARSEF 549	849	NULL	NULL	PF12341;PF00400;	NULL	1 out of 5	NULL	KID71814;	K11274
MAN_01281	1114.95	1.97222	0.0970988	20.3115	1.01825e-91	1.29288e-90	1797.25	1797.18	1775.43	1737.93	378.62	500.522	493.489	439.204	KID71682.1	353	Pyridoxal phosphate-dependent transferase, major domain protein, partial	MAN_01281	A0A0B4FVD6	A0A0B4FVD6_METAN	unreviewed	Pyridoxal phosphate-dependent transferase, major domain protein (Fragment)	Metarhizium anisopliae ARSEF 549	353	GO:0006520; GO:0016740; GO:0016829	lyase activity [GO:0016829]; transferase activity [GO:0016740]; cellular amino acid metabolic process [GO:0006520]	PF01212;	NULL	1 out of 5	NULL	KID71682;	K01620
MAN_05508	465.011	-4.72902	0.233046	-20.2922	1.50816e-91	1.91253e-90	48.0277	21.6075	21.4059	41.7311	882.082	928.007	687.467	1089.76	KID65849.1	292	sorbitol utilization protein SOU2, partial	MAN_05508	A0A0B4GC20	A0A0B4GC20_METAN	unreviewed	Sorbitol utilization protein SOU2 (Fragment)	Metarhizium anisopliae ARSEF 549	292	GO:0016491	oxidoreductase activity [GO:0016491]	NULL	NULL	1 out of 5	NULL	KID65849;	K17742
MAN_10513	414.317	3.24116	0.159744	20.2897	1.58625e-91	2.00906e-90	684.184	742.172	842.387	728.556	85.957	103.112	67.3396	60.8288	KID59707.1	435	Major facilitator superfamily domain, general substrate transporter, partial	MAN_10513	A0A0B4EVE3	A0A0B4EVE3_METAN	unreviewed	Major facilitator superfamily domain, general substrate transporter (Fragment)	Metarhizium anisopliae ARSEF 549	435	GO:0016021; GO:0055085	integral component of membrane [GO:0016021]; transmembrane transport [GO:0055085]	PF07690;	NULL	1 out of 5	NULL	KID59707;	NULL
MAN_05547	3607.24	-1.05628	0.0520985	-20.2747	2.15215e-91	2.7224e-90	2373.58	2379.65	2243.85	2369.98	4933.32	4891.37	4933.88	4732.27	KID65888.1	472	Longevity assurance, LAG1/LAC1, partial	MAN_05547	A0A0B4F5Y9	A0A0B4F5Y9_METAN	unreviewed	Longevity assurance, LAG1/LAC1 (Fragment)	Metarhizium anisopliae ARSEF 549	472	GO:0005783; GO:0016021	endoplasmic reticulum [GO:0005783]; integral component of membrane [GO:0016021]	PF08390;PF03798;	NULL	1 out of 5	NULL	KID65888;	K04709
MAN_10068	544.278	-2.21907	0.109452	-20.2743	2.16788e-91	2.7389e-90	182.842	201.044	191.394	194.745	957.806	841.006	811.09	974.291	KID60251.1	254	hypothetical protein MAN_10068, partial	MAN_10068	A0A0B4EWW3	A0A0B4EWW3_METAN	unreviewed	Uncharacterized protein (Fragment)	Metarhizium anisopliae ARSEF 549	254	NULL	NULL	NULL	NULL	1 out of 5	NULL	KID60197;KID60251;	NULL
MAN_03674	21556.4	-0.850728	0.0420001	-20.2554	3.18428e-91	4.01803e-90	15207.1	15579	15625.1	15106.7	27990.3	27308.5	28295.7	27338.9	KID68818.1	444	GPI-anchored cell wall beta-1,3-endoglucanase EglC, partial	MAN_03674	A0A0B4FED2	A0A0B4FED2_METAN	unreviewed	GPI-anchored cell wall beta-1,3-endoglucanase EglC (Fragment)	Metarhizium anisopliae ARSEF 549	444	NULL	NULL	NULL	SIGNAL 1 18 {ECO:0000256|SAM:SignalP}.	1 out of 5	NULL	KID68818;	K01199
MAN_07273	2797.93	1.44815	0.0715019	20.2533	3.31998e-91	4.18408e-90	4272.78	4391.03	3809	3906.21	1488.9	1508.01	1554.84	1452.67	KID63072.1	352	Alpha/beta hydrolase fold-3, partial	MAN_07273	A0A0B4F5P5	A0A0B4F5P5_METAN	unreviewed	Alpha/beta hydrolase fold-3 (Fragment)	Metarhizium anisopliae ARSEF 549	352	GO:0008152; GO:0016787	hydrolase activity [GO:0016787]; metabolic process [GO:0008152]	PF07859;	NULL	1 out of 5	NULL	KID63072;	NULL
MAN_07651	370.676	2.681	0.132405	20.2486	3.65794e-91	4.6043e-90	636.999	617.224	642.178	669.437	91.0735	85.9266	124.629	97.9446	KID63450.1	578	tripeptidyl peptidase precursor, partial	MAN_07651	A0A0B4EN07	A0A0B4EN07_METAN	unreviewed	Tripeptidyl peptidase (Fragment)	Metarhizium anisopliae ARSEF 549	578	GO:0004252; GO:0046872	metal ion binding [GO:0046872]; serine-type endopeptidase activity [GO:0004252]	PF00082;PF09286;	SIGNAL 1 17 {ECO:0000256|SAM:SignalP}.	1 out of 5	NULL	KID63450;	K01279
MAN_06589	1564.19	-1.94957	0.0963089	-20.2429	4.10396e-91	5.15933e-90	686.712	625.679	572.924	684.217	2596.11	2746.43	2312.66	2288.81	KID64415.1	381	hypothetical protein MAN_06589, partial	MAN_06589	A0A0B4EQX0	A0A0B4EQX0_METAN	unreviewed	Uncharacterized protein (Fragment)	Metarhizium anisopliae ARSEF 549	381	GO:0016021	integral component of membrane [GO:0016021]	NULL	NULL	1 out of 5	NULL	KID64415;	NULL
MAN_01938	224.127	-4.95255	0.244681	-20.2409	4.27613e-91	5.36915e-90	17.6944	4.69729	15.1101	18.2574	386.806	475.818	426.149	448.483	KID69424.1	579	Major facilitator superfamily domain, general substrate transporter, partial	MAN_01938	A0A0B4GMI0	A0A0B4GMI0_METAN	unreviewed	Major facilitator superfamily domain, general substrate transporter (Fragment)	Metarhizium anisopliae ARSEF 549	579	GO:0016021; GO:0055085	integral component of membrane [GO:0016021]; transmembrane transport [GO:0055085]	PF07690;	NULL	1 out of 5	NULL	KID69424;	NULL
MAN_07524	2354.53	-2.84356	0.140551	-20.2315	5.17044e-91	6.48406e-90	536.731	543.946	613.217	610.318	3359.49	5141.63	3459.45	4571.44	KID63323.1	226	hypothetical protein MAN_07524, partial	MAN_07524	A0A0B4EYY1	A0A0B4EYY1_METAN	unreviewed	Uncharacterized protein (Fragment)	Metarhizium anisopliae ARSEF 549	226	NULL	NULL	NULL	NULL	1 out of 5	NULL	KID63323;	NULL
MAN_09473	0	NA	NA	NA	NA	NA	0	0	0	0	0	0	0	0	KID61189.1	409	polyketide synthase for naphthopyrone YWA1, partial	MAN_09473	A0A0B4FY32	A0A0B4FY32_METAN	unreviewed	Polyketide synthase for naphthopyrone YWA1 (Fragment)	Metarhizium anisopliae ARSEF 549	409	GO:0003824; GO:0008152	catalytic activity [GO:0003824]; metabolic process [GO:0008152]	PF00109;PF16073;	NULL	1 out of 5	NULL	KID61189;	NULL
MAN_00415	230.193	2.39609	0.167003	14.3476	1.10265e-46	7.12456e-46	394.333	382.359	355.087	415.573	96.19	64.4449	58.294	75.2627	KID70816.1	397	Alcohol dehydrogenase superfamily, zinc-type, partial	MAN_00415	A0A0B4FYR8	A0A0B4FYR8_METAN	unreviewed	Alcohol dehydrogenase superfamily, zinc-type (Fragment)	Metarhizium anisopliae ARSEF 549	397	GO:0008270; GO:0016491	oxidoreductase activity [GO:0016491]; zinc ion binding [GO:0008270]	PF00107;	NULL	1 out of 5	NULL	KID70816;	K00344
MAN_05626	1439.04	-2.36166	0.117053	-20.1759	1.59375e-90	1.99131e-89	471.008	442.485	472.19	489.471	2692.3	1995.65	2741.83	2207.36	KID65967.1	683	hypothetical protein MAN_05626, partial	MAN_05626	A0A0B4FDK0	A0A0B4FDK0_METAN	unreviewed	Uncharacterized protein (Fragment)	Metarhizium anisopliae ARSEF 549	683	NULL	NULL	NULL	NULL	1 out of 5	NULL	KID65967;	NULL
MAN_09383	6932.98	10.5061	0.521219	20.1569	2.34185e-90	2.92243e-89	14059.5	14258.2	14173.3	12934.9	10.233	10.7408	17.0862	0	KID61099.1	175	hypothetical protein MAN_09383, partial	MAN_09383	A0A0B4FXW2	A0A0B4FXW2_METAN	unreviewed	Uncharacterized protein (Fragment)	Metarhizium anisopliae ARSEF 549	175	GO:0016021	integral component of membrane [GO:0016021]	NULL	NULL	1 out of 5	NULL	KID61099;	NULL
MAN_01166	4298.22	1.37471	0.0682635	20.1383	3.40558e-90	4.24468e-89	6139.96	6243.64	6401.64	6031.02	2449.77	2451.06	2146.83	2521.82	KID71567.1	347	Potassium channel, voltage-dependent, beta subunit, KCNAB-related protein, partial	MAN_01166	A0A0B4FV37	A0A0B4FV37_METAN	unreviewed	Potassium channel, voltage-dependent, beta subunit, KCNAB-related protein (Fragment)	Metarhizium anisopliae ARSEF 549	347	NULL	NULL	PF00248;	NULL	1 out of 5	NULL	KID71567;	NULL
MAN_10506	186.85	-4.53635	0.225316	-20.1333	3.76905e-90	4.69196e-89	18.537	15.0313	12.5917	14.7798	350.991	400.633	330.668	351.57	KID59700.1	444	UPF0075 domain protein, partial	MAN_10506	A0A0B4EBX0	A0A0B4EBX0_METAN	unreviewed	UPF0075 domain protein (Fragment)	Metarhizium anisopliae ARSEF 549	444	GO:0005524; GO:0006040; GO:0009254; GO:0016773	ATP binding [GO:0005524]; phosphotransferase activity, alcohol group as acceptor [GO:0016773]; amino sugar metabolic process [GO:0006040]; peptidoglycan turnover [GO:0009254]	PF03702;	NULL	1 out of 5	NULL	KID59700;	NULL
MAN_01129	2050.88	1.69101	0.0840129	20.128	4.195e-90	5.21583e-89	2854.7	2951.78	3411.1	3310.67	1014.09	990.304	916.623	957.795	KID71530.1	209	hypothetical protein MAN_01129, partial	MAN_01129	A0A0B4FBS4	A0A0B4FBS4_METAN	unreviewed	Uncharacterized protein (Fragment)	Metarhizium anisopliae ARSEF 549	209	NULL	NULL	NULL	NULL	1 out of 5	NULL	KID71530;	NULL
MAN_06932	2464.92	-2.49442	0.123962	-20.1226	4.68225e-90	5.81455e-89	702.721	687.683	763.059	818.974	5034.62	3861.33	4438.38	3412.6	KID63761.1	1528	wd-repeat protein, partial	MAN_06932	A0A0B4FD02	A0A0B4FD02_METAN	unreviewed	Wd-repeat protein (Fragment)	Metarhizium anisopliae ARSEF 549	1528	NULL	NULL	PF17100;PF00400;	NULL	1 out of 5	NULL	KID63761;	NULL
MAN_01817	902.721	-4.22307	0.209875	-20.1218	4.75276e-90	5.89493e-89	94.3702	72.3383	59.1811	138.234	1366.1	1687.38	1766.91	2037.25	KID69303.1	182	hypothetical protein MAN_01817, partial	MAN_01817	A0A0B4FFS3	A0A0B4FFS3_METAN	unreviewed	Uncharacterized protein (Fragment)	Metarhizium anisopliae ARSEF 549	182	NULL	NULL	PF16541;	SIGNAL 1 21 {ECO:0000256|SAM:SignalP}.	1 out of 5	NULL	KID69303;	NULL
MAN_08310	1967.06	1.66991	0.0830199	20.1145	5.50374e-90	6.81808e-89	2948.23	2951.78	3068.6	3004.64	1024.32	1003.19	819.131	916.556	KID62306.1	511	Phosphomethylpyrimidine kinase type-1, partial	MAN_08310	A0A0B4F8Z6	A0A0B4F8Z6_METAN	unreviewed	Phosphomethylpyrimidine kinase type-1 (Fragment)	Metarhizium anisopliae ARSEF 549	511	GO:0008972; GO:0009228; GO:0050334	phosphomethylpyrimidine kinase activity [GO:0008972]; thiaminase activity [GO:0050334]; thiamine biosynthetic process [GO:0009228]	PF08543;PF03070;	NULL	1 out of 5	NULL	KID62306;	K00877
MAN_02218	831.407	-2.3764	0.118149	-20.1135	5.61599e-90	6.94868e-89	273.842	253.654	222.874	319.939	1505.27	1431.75	1261.36	1382.57	KID69704.1	257	RNase P, subunit Pop3, partial	MAN_02218	A0A0B4GNB4	A0A0B4GNB4_METAN	unreviewed	RNase P, subunit Pop3 (Fragment)	Metarhizium anisopliae ARSEF 549	257	GO:0006364; GO:0008033	rRNA processing [GO:0006364]; tRNA processing [GO:0008033]	PF08228;	NULL	1 out of 5	NULL	KID69704;	K14522
MAN_10014	548.532	-2.21932	0.110434	-20.0964	7.93603e-90	9.80735e-89	182.842	205.741	192.653	194.745	970.086	850.673	813.101	978.415	KID60197.1	254	hypothetical protein MAN_10014, partial	MAN_10014	A0A0B4EWW3	A0A0B4EWW3_METAN	unreviewed	Uncharacterized protein (Fragment)	Metarhizium anisopliae ARSEF 549	254	NULL	NULL	NULL	NULL	1 out of 5	NULL	KID60197;KID60251;	NULL
MAN_02890	295.66	-4.00735	0.199687	-20.0682	1.40006e-89	1.7281e-88	26.9629	25.3654	37.7752	48.6863	536.208	557.449	488.463	644.373	KID68034.1	99	hypothetical protein MAN_02890, partial	MAN_02890	A0A0B4GIA3	A0A0B4GIA3_METAN	unreviewed	Uncharacterized protein (Fragment)	Metarhizium anisopliae ARSEF 549	99	NULL	NULL	NULL	NULL	1 out of 5	NULL	KID68034;	NULL
MAN_04379	3963.93	1.57507	0.0785117	20.0617	1.59657e-89	1.96826e-88	6288.26	6477.56	5379.19	5596.32	2016.92	2021.42	2017.17	1914.56	KID67621.1	597	electron transfer flavoprotein, partial	MAN_04379	A0A0B4FPL0	A0A0B4FPL0_METAN	unreviewed	Electron transfer flavoprotein (Fragment)	Metarhizium anisopliae ARSEF 549	597	GO:0016491	oxidoreductase activity [GO:0016491]	NULL	NULL	1 out of 5	NULL	KID67621;	K00311
MAN_08625	2496.68	-1.42854	0.0712415	-20.052	1.93718e-89	2.38528e-88	1331.29	1344.36	1425.38	1311.92	3400.42	3848.44	3485.58	3826.03	KID61946.1	895	DNA replication licensing factor mcm3, partial	MAN_08625	A0A0B4F7Y5	A0A0B4F7Y5_METAN	unreviewed	DNA helicase (EC 3.6.4.12) (Fragment)	Metarhizium anisopliae ARSEF 549	895	GO:0003677; GO:0004386; GO:0005524; GO:0005634; GO:0006270; GO:0042555	MCM complex [GO:0042555]; nucleus [GO:0005634]; ATP binding [GO:0005524]; DNA binding [GO:0003677]; helicase activity [GO:0004386]; DNA replication initiation [GO:0006270]	PF00493;PF14551;PF17207;	NULL	2 out of 5	NULL	KID61946;	K02541
MAN_02733	20849	-5.80008	0.289383	-20.0429	2.3281e-89	2.86317e-88	545.999	589.04	683.731	1121.52	40940.1	41767.8	31559.2	49584.7	KID70219.1	155	Blastomyces yeast-phase-specific protein, partial	MAN_02733	A0A0B4GPY9	A0A0B4GPY9_METAN	unreviewed	Blastomyces yeast-phase-specific protein (Fragment)	Metarhizium anisopliae ARSEF 549	155	NULL	NULL	PF04681;	SIGNAL 1 20 {ECO:0000256|SAM:SignalP}.	1 out of 5	NULL	KID70219;	NULL
MAN_08966	483.52	-3.19522	0.159564	-20.0246	3.35928e-89	4.12636e-88	94.3702	83.6118	81.8462	119.108	776.683	865.71	786.969	1059.86	KID61727.1	455	Guanine deaminase, partial	MAN_08966	A0A0B4F1J5	A0A0B4F1J5_METAN	unreviewed	Guanine deaminase (Fragment)	Metarhizium anisopliae ARSEF 549	455	GO:0016810	hydrolase activity, acting on carbon-nitrogen (but not peptide) bonds [GO:0016810]	PF01979;	NULL	1 out of 5	NULL	KID61727;	K01487
MAN_09227	4551.72	-2.00156	0.1	-20.0156	4.03043e-89	4.94481e-88	1903.41	1848.85	1673.44	1848.34	8638.68	6449.86	7285.74	6765.4	KID61462.1	517	n-alkane-inducible cytochrome P450, partial	MAN_09227	A0A0B4F0U0	A0A0B4F0U0_METAN	unreviewed	N-alkane-inducible cytochrome P450 (Fragment)	Metarhizium anisopliae ARSEF 549	517	GO:0005506; GO:0016021; GO:0016712; GO:0020037	integral component of membrane [GO:0016021]; heme binding [GO:0020037]; iron ion binding [GO:0005506]; oxidoreductase activity, acting on paired donors, with incorporation or reduction of molecular oxygen, reduced flavin or flavoprotein as one donor, and incorporation of one atom of oxygen [GO:0016712]	PF00067;	NULL	1 out of 5	NULL	KID61462;	NULL
MAN_05066	2293.26	-1.99283	0.099588	-20.0107	4.43932e-89	5.43991e-88	932.748	847.391	858.756	1042.41	3223.39	3733.51	4071.53	3636.32	KID66785.1	857	hypothetical protein MAN_05066, partial	MAN_05066	A0A0B4EY09	A0A0B4EY09_METAN	unreviewed	Uncharacterized protein (Fragment)	Metarhizium anisopliae ARSEF 549	857	NULL	NULL	PF11885;	NULL	1 out of 5	NULL	KID66785;	NULL
MAN_03622	4002.2	1.44711	0.0723242	20.0087	4.62479e-89	5.66037e-88	5749.84	5895.1	6052.84	5729.34	1961.66	2048.28	2245.32	2335.21	KID68766.1	416	3-ketoacyl-CoA thiolase, partial	MAN_03622	A0A0B4FSS8	A0A0B4FSS8_METAN	unreviewed	3-ketoacyl-CoA thiolase (Fragment)	Metarhizium anisopliae ARSEF 549	416	GO:0008152; GO:0016747	transferase activity, transferring acyl groups other than amino-acyl groups [GO:0016747]; metabolic process [GO:0008152]	PF02803;PF00108;	NULL	1 out of 5	NULL	KID68766;	K07513
MAN_09911	7539.5	1.38925	0.0695387	19.9781	8.53647e-89	1.04354e-87	11272.2	11467	10075.9	10835.3	4279.43	3981.62	4443.41	3961.09	KID60378.1	830	mitochondrion protein, partial	MAN_09911	A0A0B4EQ73	A0A0B4EQ73_METAN	unreviewed	MICOS complex subunit MIC60 (Mitofilin) (Fragment)	Metarhizium anisopliae ARSEF 549	830	GO:0003924; GO:0005525; GO:0005743; GO:0016021	integral component of membrane [GO:0016021]; mitochondrial inner membrane [GO:0005743]; GTP binding [GO:0005525]; GTPase activity [GO:0003924]	PF09731;PF00071;	NULL	2 out of 5	NULL	KID60378;	K17785
MAN_07516	1465.51	1.52982	0.0765884	19.9745	9.17267e-89	1.11997e-87	2247.19	2278.19	2056.23	2125.68	783.846	774.413	770.888	687.674	KID63315.1	241	mitochondrial co-chaperone GrpE, partial	MAN_07516	A0A0B4EMM0	A0A0B4EMM0_METAN	unreviewed	GrpE protein homolog (Fragment)	Metarhizium anisopliae ARSEF 549	241	GO:0000774; GO:0005759; GO:0006457; GO:0042803; GO:0051087	mitochondrial matrix [GO:0005759]; adenyl-nucleotide exchange factor activity [GO:0000774]; chaperone binding [GO:0051087]; protein homodimerization activity [GO:0042803]; protein folding [GO:0006457]	PF01025;	NULL	2 out of 5	NULL	KID63315;	K03687
MAN_04451	2111.76	3.1404	0.157362	19.9566	1.31396e-88	1.60241e-87	3958.49	3837.69	4278.67	3098.54	290.616	468.3	486.453	475.289	KID67693.1	186	hypothetical protein MAN_04451, partial	MAN_04451	A0A0B4FAV6	A0A0B4FAV6_METAN	unreviewed	Uncharacterized protein (Fragment)	Metarhizium anisopliae ARSEF 549	186	NULL	NULL	NULL	NULL	1 out of 5	NULL	KID67693;	NULL
MAN_01872	1451.07	1.66303	0.0833408	19.9546	1.36787e-88	1.66615e-87	2069.4	2095.93	2178.37	2478.66	688.679	690.635	696.513	710.356	KID69358.1	1012	hypothetical protein MAN_01872, partial	MAN_01872	A0A0B4FFX8	A0A0B4FFX8_METAN	unreviewed	Uncharacterized protein (Fragment)	Metarhizium anisopliae ARSEF 549	1012	GO:0016787	hydrolase activity [GO:0016787]	PF06032;PF05378;PF01968;	NULL	1 out of 5	NULL	KID69358;	NULL
MAN_10341	775.342	-2.95192	0.148004	-19.9449	1.66044e-88	2.0201e-87	197.166	170.042	149.842	190.398	1595.32	1466.12	1052.31	1381.53	KID59889.1	1022	calcium-transporting ATPase 3, partial	MAN_10341	A0A0B4FUI1	A0A0B4FUI1_METAN	unreviewed	Calcium-transporting ATPase 3 (Fragment)	Metarhizium anisopliae ARSEF 549	1022	GO:0005524; GO:0016021; GO:0019829	integral component of membrane [GO:0016021]; ATP binding [GO:0005524]; cation-transporting ATPase activity [GO:0019829]	PF00689;PF00690;	NULL	1 out of 5	NULL	KID59889;	NULL
MAN_05614	1832.24	1.78051	0.089368	19.9233	2.55494e-88	3.10465e-87	2849.64	2923.59	2761.37	2818.59	956.783	794.821	823.151	729.945	KID65955.1	562	cytochrome P450 78A3, partial	MAN_05614	A0A0B4EVI4	A0A0B4EVI4_METAN	unreviewed	Cytochrome P450 78A3 (Fragment)	Metarhizium anisopliae ARSEF 549	562	GO:0005506; GO:0016021; GO:0016705; GO:0020037	integral component of membrane [GO:0016021]; heme binding [GO:0020037]; iron ion binding [GO:0005506]; oxidoreductase activity, acting on paired donors, with incorporation or reduction of molecular oxygen [GO:0016705]	PF00067;	NULL	1 out of 5	NULL	KID65955;	NULL
MAN_03346	1863.44	1.19979	0.0602717	19.9064	3.57985e-88	4.34488e-87	2633.94	2636.12	2622.86	2493.44	1103.11	1160.01	1152.81	1105.23	KID68490.1	307	Mitochondrial inner membrane protease ATP23, partial	MAN_03346	A0A0B4F2X9	A0A0B4F2X9_METAN	unreviewed	Mitochondrial inner membrane protease ATP23 (EC 3.4.24.-) (Fragment)	Metarhizium anisopliae ARSEF 549	307	GO:0004222; GO:0005743; GO:0046872	mitochondrial inner membrane [GO:0005743]; metal ion binding [GO:0046872]; metalloendopeptidase activity [GO:0004222]	PF09768;	NULL	2 out of 5	NULL	KID68490;	K18156
MAN_05975	2704.86	1.61746	0.0812669	19.9031	3.82801e-88	4.64055e-87	4100.05	3910.96	4073.42	4235.71	1188.05	1335.08	1496.55	1299.06	KID64964.1	564	Peptidase M16, core, partial	MAN_05975	A0A0B4G9A6	A0A0B4G9A6_METAN	unreviewed	Peptidase M16, core (Fragment)	Metarhizium anisopliae ARSEF 549	564	GO:0004222; GO:0046872	metal ion binding [GO:0046872]; metalloendopeptidase activity [GO:0004222]	PF00675;PF05193;	NULL	1 out of 5	NULL	KID64964;	K01412
MAN_07632	675.335	1.99082	0.100111	19.8861	5.37321e-88	6.50599e-87	1145.92	1060.65	1027.49	1082.4	242.522	254.558	302.526	286.617	KID63431.1	532	Glycoside hydrolase, family 3, partial	MAN_07632	A0A0B4FC12	A0A0B4FC12_METAN	unreviewed	Glycoside hydrolase, family 3 (Fragment)	Metarhizium anisopliae ARSEF 549	532	GO:0004553; GO:0005975	hydrolase activity, hydrolyzing O-glycosyl compounds [GO:0004553]; carbohydrate metabolic process [GO:0005975]	PF00933;	NULL	1 out of 5	NULL	KID63431;	K01207
MAN_03305	291.249	-2.66424	0.134001	-19.8823	5.79145e-88	7.00407e-87	77.5184	77.975	85.6238	77.3765	453.321	512.337	543.742	502.095	KID68449.1	460	hypothetical protein MAN_03305, partial	MAN_03305	A0A0B4GJG3	A0A0B4GJG3_METAN	unreviewed	Uncharacterized protein (Fragment)	Metarhizium anisopliae ARSEF 549	460	GO:0016021	integral component of membrane [GO:0016021]	NULL	NULL	1 out of 5	NULL	KID68449;	NULL
MAN_01448	297.676	-3.47102	0.174672	-19.8717	7.15945e-88	8.64824e-87	39.6018	46.0334	46.5894	64.3355	604.769	570.338	464.342	545.397	KID71849.1	185	hypothetical protein MAN_01448, partial	MAN_01448	A0A0B4GV30	A0A0B4GV30_METAN	unreviewed	Uncharacterized protein (Fragment)	Metarhizium anisopliae ARSEF 549	185	NULL	NULL	NULL	NULL	1 out of 5	NULL	KID71849;	NULL
MAN_05722	3456.93	-1.71672	0.0863917	-19.8714	7.19971e-88	8.68657e-87	1718.04	1643.11	1405.24	1679.68	4825.87	5231.86	5660.55	5491.09	KID66063.1	532	glycosyl hydrolase family 16, partial	MAN_05722	A0A0B4F6G3	A0A0B4F6G3_METAN	unreviewed	Glycosyl hydrolase family 16 (Fragment)	Metarhizium anisopliae ARSEF 549	532	GO:0004553; GO:0005975; GO:0016021	integral component of membrane [GO:0016021]; hydrolase activity, hydrolyzing O-glycosyl compounds [GO:0004553]; carbohydrate metabolic process [GO:0005975]	PF00722;	SIGNAL 1 22 {ECO:0000256|SAM:SignalP}.	1 out of 5	NULL	KID66063;	NULL
MAN_04387	344.9	-2.92497	0.147217	-19.8683	7.64872e-88	9.21739e-87	74.148	59.1858	94.438	94.7645	620.118	621.894	610.077	584.575	KID67629.1	827	hypothetical protein MAN_04387, partial	MAN_04387	A0A0B4GH69	A0A0B4GH69_METAN	unreviewed	Uncharacterized protein (Fragment)	Metarhizium anisopliae ARSEF 549	827	GO:0003677; GO:0005634; GO:0006351; GO:0008270	nucleus [GO:0005634]; DNA binding [GO:0003677]; zinc ion binding [GO:0008270]; transcription, DNA-templated [GO:0006351]	PF04082;	NULL	1 out of 5	NULL	KID67629;	NULL
MAN_04137	425.486	2.26655	0.114146	19.8566	9.66162e-88	1.16293e-86	706.091	656.681	751.726	704.213	155.541	132.112	136.689	160.835	KID67379.1	443	Carboxylesterase family protein, partial	MAN_04137	A0A0B4GGH0	A0A0B4GGH0_METAN	unreviewed	Carboxylic ester hydrolase (EC 3.1.1.-) (Fragment)	Metarhizium anisopliae ARSEF 549	443	GO:0016787	hydrolase activity [GO:0016787]	PF00135;	NULL	1 out of 5	NULL	KID67379;	K03929
MAN_04877	380.248	2.36315	0.119093	19.8428	1.2706e-87	1.52757e-86	663.962	680.168	572.924	629.445	129.959	117.075	120.608	127.844	KID66596.1	277	Methyltransferase type 11, partial	MAN_04877	A0A0B4FLG2	A0A0B4FLG2_METAN	unreviewed	Methyltransferase type 11 (Fragment)	Metarhizium anisopliae ARSEF 549	277	GO:0008168	methyltransferase activity [GO:0008168]	PF08241;	NULL	1 out of 5	NULL	KID66596;	NULL
MAN_07797	626.468	-4.38261	0.221001	-19.8307	1.61638e-87	1.94099e-86	48.0277	52.6096	46.5894	80.8541	860.593	1271.71	1053.31	1598.04	KID62581.1	208	hypothetical protein MAN_07797, partial	MAN_07797	A0A0B4F9X5	A0A0B4F9X5_METAN	unreviewed	Uncharacterized protein (Fragment)	Metarhizium anisopliae ARSEF 549	208	GO:0016021	integral component of membrane [GO:0016021]	NULL	NULL	1 out of 5	NULL	KID62581;	NULL
MAN_00941	6360.8	1.01112	0.0509883	19.8304	1.62788e-87	1.9525e-86	8823.61	8539.67	8126.7	8519.24	4280.45	4111.59	4234.35	4250.8	KID71342.1	280	Prohibitin, partial	MAN_00941	A0A0B4FUE8	A0A0B4FUE8_METAN	unreviewed	Prohibitin (Fragment)	Metarhizium anisopliae ARSEF 549	280	GO:0016020	membrane [GO:0016020]	PF01145;	NULL	1 out of 5	NULL	KID71342;	K17080
MAN_04412	1205.43	-1.85386	0.0934988	-19.8276	1.72052e-87	2.06119e-86	535.045	472.547	577.96	506.859	1977.01	2019.27	1842.29	1712.48	KID67654.1	828	hypothetical protein MAN_04412, partial	MAN_04412	A0A0B4GH89	A0A0B4GH89_METAN	unreviewed	Uncharacterized protein (Fragment)	Metarhizium anisopliae ARSEF 549	828	NULL	NULL	PF11951;	NULL	1 out of 5	NULL	KID67654;	NULL
MAN_01656	196.422	3.9422	0.198996	19.8104	2.4192e-87	2.89479e-86	412.87	365.449	358.864	338.196	21.4892	23.6298	26.1318	24.7439	KID69142.1	365	SAM dependent carboxyl methyltransferase family protein, partial	MAN_01656	A0A0B4FMX2	A0A0B4FMX2_METAN	unreviewed	SAM dependent carboxyl methyltransferase family protein (Fragment)	Metarhizium anisopliae ARSEF 549	365	GO:0008168	methyltransferase activity [GO:0008168]	PF03492;	NULL	1 out of 5	NULL	KID69142;	NULL
MAN_04149	498.607	2.48936	0.125902	19.7721	5.17366e-87	6.18349e-86	840.063	851.149	834.832	859.835	135.075	136.408	138.699	192.796	KID67391.1	70	hypothetical protein MAN_04149, partial	MAN_04149	A0A0B4FNV7	A0A0B4FNV7_METAN	unreviewed	Uncharacterized protein (Fragment)	Metarhizium anisopliae ARSEF 549	70	NULL	NULL	NULL	NULL	1 out of 5	NULL	KID67391;	NULL
MAN_09265	27345.7	-4.8605	0.245838	-19.7711	5.27723e-87	6.29988e-86	1557.95	1525.68	1738.92	2456.92	64687.7	59627.7	35249.8	51921	KID60981.1	429	hemeolysin E, partial	MAN_09265	A0A0B4F524	A0A0B4F524_METAN	unreviewed	Hemeolysin E (Fragment)	Metarhizium anisopliae ARSEF 549	429	NULL	NULL	NULL	NULL	1 out of 5	NULL	KID60981;	NULL
MAN_05667	495.361	-2.50075	0.126525	-19.7648	5.97771e-87	7.12776e-86	117.12	145.616	159.915	173.88	810.452	831.34	890.491	834.076	KID66008.1	211	hypothetical protein MAN_05667, partial	MAN_05667	A0A0B4F6A9	A0A0B4F6A9_METAN	unreviewed	Uncharacterized protein (Fragment)	Metarhizium anisopliae ARSEF 549	211	GO:0016021	integral component of membrane [GO:0016021]	NULL	NULL	1 out of 5	NULL	KID66008;	NULL
MAN_10212	1448.32	0.964476	0.0834098	11.5631	6.33857e-31	2.85853e-30	1794.72	1945.62	2026.01	1896.16	946.55	940.896	1102.56	934.082	KID59962.1	848	ABC transporter, transmembrane domain, type 1, partial	MAN_10212	A0A0B4EW70	A0A0B4EW70_METAN	unreviewed	ABC transporter, transmembrane domain, type 1 (Fragment)	Metarhizium anisopliae ARSEF 549	848	GO:0005524; GO:0016021; GO:0042626	integral component of membrane [GO:0016021]; ATP binding [GO:0005524]; ATPase activity, coupled to transmembrane movement of substances [GO:0042626]	PF00664;PF00005;	NULL	1 out of 5	NULL	KID59962;	NULL
MAN_01196	893.307	1.64311	0.0831863	19.7522	7.67669e-87	9.13221e-86	1343.09	1320.88	1424.12	1325.83	398.063	437.152	426.149	471.165	KID71597.1	235	hypothetical protein MAN_01196, partial	MAN_01196	A0A0B4FV57	A0A0B4FV57_METAN	unreviewed	Uncharacterized protein (Fragment)	Metarhizium anisopliae ARSEF 549	235	NULL	NULL	NULL	NULL	1 out of 5	NULL	KID71597;	NULL
MAN_03959	14055.8	1.9479	0.0986398	19.7476	8.41222e-87	9.99552e-86	23733.3	23779.6	20403.6	21383.7	5454.18	5379	6885.73	5427.16	KID67201.1	472	Citrate synthase, partial	MAN_03959	A0A0B4FNB4	A0A0B4FNB4_METAN	unreviewed	Citrate synthase (Fragment)	Metarhizium anisopliae ARSEF 549	472	GO:0004108; GO:0006099	citrate (Si)-synthase activity [GO:0004108]; tricarboxylic acid cycle [GO:0006099]	PF00285;	NULL	1 out of 5	NULL	KID67201;	K01647
MAN_04955	3094.06	-1.40394	0.0711196	-19.7405	9.67603e-87	1.14838e-85	1599.24	1662.84	1735.14	1792.7	4585.4	4394.07	4795.18	4187.91	KID66674.1	731	pre-mRNA splicing factor CLF1, partial	MAN_04955	A0A0B4GEN5	A0A0B4GEN5_METAN	unreviewed	Pre-mRNA splicing factor CLF1 (Fragment)	Metarhizium anisopliae ARSEF 549	731	GO:0016021	integral component of membrane [GO:0016021]	NULL	NULL	1 out of 5	NULL	KID66674;	NULL
MAN_02702	752.408	-1.6562	0.0840516	-19.7046	1.96913e-86	2.33431e-85	337.879	362.631	375.234	375.58	1193.16	1078.38	1144.77	1151.62	KID70188.1	598	A/G-specific adenine glycosylase, partial	MAN_02702	A0A0B4FIA4	A0A0B4FIA4_METAN	unreviewed	A/G-specific adenine glycosylase (Fragment)	Metarhizium anisopliae ARSEF 549	598	GO:0006284; GO:0016787	hydrolase activity [GO:0016787]; base-excision repair [GO:0006284]	PF00730;PF14815;	NULL	1 out of 5	NULL	KID70188;	K03575
MAN_08263	4141.39	1.90238	0.0966752	19.6781	3.3217e-86	3.93313e-85	6703.66	6696.46	6799.53	5938.86	1642.39	2078.35	1657.36	1614.54	KID62259.1	604	Cyclin PHO80-like protein, partial	MAN_08263	A0A0B4G1D1	A0A0B4G1D1_METAN	unreviewed	Cyclin PHO80-like protein (Fragment)	Metarhizium anisopliae ARSEF 549	604	GO:0000079; GO:0019901	protein kinase binding [GO:0019901]; regulation of cyclin-dependent protein serine/threonine kinase activity [GO:0000079]	PF08613;	NULL	1 out of 5	NULL	KID62259;	NULL
MAN_04181	359.423	3.50573	0.17833	19.6587	4.8709e-86	5.76079e-85	685.027	708.351	574.183	674.653	73.6774	71.9635	44.223	43.3018	KID67423.1	264	glutathione S-transferase II, partial	MAN_04181	A0A0B4FA24	A0A0B4FA24_METAN	unreviewed	Glutathione S-transferase II (Fragment)	Metarhizium anisopliae ARSEF 549	264	GO:0016740	transferase activity [GO:0016740]	PF00043;PF02798;	NULL	1 out of 5	NULL	KID67423;	K00799
MAN_08333	1888.09	1.43336	0.0729166	19.6575	4.98976e-86	5.89451e-85	2755.27	2938.62	2549.83	2777.73	1046.83	1066.56	971.901	998.004	KID62329.1	446	CRAL/TRIO domain protein, partial	MAN_08333	A0A0B4G1K6	A0A0B4G1K6_METAN	unreviewed	CRAL/TRIO domain protein (Fragment)	Metarhizium anisopliae ARSEF 549	446	NULL	NULL	PF00650;PF03765;	NULL	1 out of 5	NULL	KID62329;	NULL
MAN_07136	275.307	4.23158	0.21543	19.6425	6.69632e-86	7.90135e-85	559.481	490.397	434.415	606.84	30.6989	19.3335	22.1115	39.1779	KID63965.1	569	MSF membrane transporter, partial	MAN_07136	A0A0B4EPK4	A0A0B4EPK4_METAN	unreviewed	MSF membrane transporter (Fragment)	Metarhizium anisopliae ARSEF 549	569	GO:0016021; GO:0055085	integral component of membrane [GO:0016021]; transmembrane transport [GO:0055085]	PF07690;	NULL	1 out of 5	NULL	KID63965;	NULL
MAN_03727	6779.29	1.19764	0.0609845	19.6385	7.25011e-86	8.54489e-85	9430.28	8749.17	10083.5	9506.88	4023.61	4116.96	4128.82	4195.12	KID68871.1	419	Biotin synthase, partial	MAN_03727	A0A0B4FT35	A0A0B4FT35_METAN	unreviewed	Biotin synthase (Fragment)	Metarhizium anisopliae ARSEF 549	419	GO:0004076; GO:0009102; GO:0051536	biotin synthase activity [GO:0004076]; iron-sulfur cluster binding [GO:0051536]; biotin biosynthetic process [GO:0009102]	PF06968;PF04055;	NULL	1 out of 5	NULL	KID68871;	K01012
MAN_03729	2077.96	-1.88471	0.09599	-19.6345	7.85228e-86	9.2439e-85	823.212	865.241	892.754	961.555	2873.42	3165.32	3699.66	3342.49	KID68873.1	1506	cell wall-binding protein, partial	MAN_03729	A0A0B4FEJ1	A0A0B4FEJ1_METAN	unreviewed	Cell wall-binding protein (Fragment)	Metarhizium anisopliae ARSEF 549	1506	NULL	NULL	PF01822;	SIGNAL 1 21 {ECO:0000256|SAM:SignalP}.	1 out of 5	NULL	KID68873;	NULL
MAN_01585	925.739	1.72286	0.0878004	19.6225	9.92985e-86	1.16762e-84	1374.27	1491.86	1410.27	1407.56	447.181	414.596	386.951	473.227	KID69071.1	236	proteinrelated to NonF protein, involved in nonactin biosynthesis, partial	MAN_01585	A0A0B4FTR0	A0A0B4FTR0_METAN	unreviewed	Proteinrelated to NonF protein, involved in nonactin biosynthesis (Fragment)	Metarhizium anisopliae ARSEF 549	236	NULL	NULL	PF01965;	NULL	1 out of 5	NULL	KID69071;	NULL
MAN_00768	4885.21	-1.33805	0.0684572	-19.5457	4.48391e-85	5.26639e-84	2698.82	2580.69	2971.65	2829.89	6697.48	6827.94	7033.47	7441.73	KID71169.1	147	ef-hand 2, partial	MAN_00768	A0A0B4GSX3	A0A0B4GSX3_METAN	unreviewed	Ef-hand 2 (Fragment)	Metarhizium anisopliae ARSEF 549	147	GO:0005509	calcium ion binding [GO:0005509]	PF13833;	NULL	1 out of 5	NULL	KID71169;	NULL
MAN_07164	13224.4	2.22266	0.113747	19.5404	4.98001e-85	5.84234e-84	24307.1	24355.4	17550.4	20914.3	4206.78	4938.63	4457.48	5065.28	KID63993.1	410	Lysozyme-like domain protein, partial	MAN_07164	A0A0B4F0T5	A0A0B4F0T5_METAN	unreviewed	Lysozyme-like domain protein (Fragment)	Metarhizium anisopliae ARSEF 549	410	NULL	NULL	NULL	SIGNAL 1 18 {ECO:0000256|SAM:SignalP}.	1 out of 5	NULL	KID63993;	NULL
MAN_08855	218.238	-5.58284	0.285833	-19.5318	5.88926e-85	6.90108e-84	13.4815	7.51566	0	12.1716	380.667	410.299	477.408	444.359	KID61616.1	499	UDP-galactopyranose mutase, partial	MAN_08855	A0A0B4F715	A0A0B4F715_METAN	unreviewed	UDP-galactopyranose mutase (Fragment)	Metarhizium anisopliae ARSEF 549	499	GO:0016491	oxidoreductase activity [GO:0016491]	PF01593;	NULL	1 out of 5	NULL	KID61616;	NULL
MAN_02528	619.431	1.93844	0.0992936	19.5223	7.10265e-85	8.31337e-84	1034.7	892.485	1028.74	974.596	279.36	243.817	253.277	248.47	KID70014.1	347	hypothetical protein MAN_02528, partial	MAN_02528	A0A0B4GPC5	A0A0B4GPC5_METAN	unreviewed	Uncharacterized protein (Fragment)	Metarhizium anisopliae ARSEF 549	347	NULL	NULL	NULL	NULL	1 out of 5	NULL	KID70014;	NULL
MAN_09570	930.454	-2.07646	0.106371	-19.5209	7.29742e-85	8.53153e-84	375.796	320.355	336.199	392.099	1372.24	1701.35	1437.25	1508.35	KID60842.1	414	hypothetical protein MAN_09570, partial	MAN_09570	A0A0B4EYT0	A0A0B4EYT0_METAN	unreviewed	Uncharacterized protein (Fragment)	Metarhizium anisopliae ARSEF 549	414	NULL	NULL	NULL	NULL	1 out of 5	NULL	KID60842;	NULL
MAN_09949	3876.57	-2.29428	0.117546	-19.5182	7.68748e-85	8.97724e-84	1146.77	1160.23	1456.86	1490.15	6714.88	7182.39	5487.68	6373.62	KID60416.1	246	hypothetical protein MAN_09949, partial	MAN_09949	A0A0B4F3H0	A0A0B4F3H0_METAN	unreviewed	Uncharacterized protein (Fragment)	Metarhizium anisopliae ARSEF 549	246	GO:0016021	integral component of membrane [GO:0016021]	NULL	SIGNAL 1 18 {ECO:0000256|SAM:SignalP}.	1 out of 5	NULL	KID60416;	NULL
MAN_02220	2772.61	-2.55133	0.130792	-19.5067	9.62429e-85	1.12261e-83	878.823	693.32	790.761	868.529	3895.69	5273.74	4196.16	5583.87	KID69706.1	508	hypothetical protein MAN_02220, partial	MAN_02220	A0A0B4FVI7	A0A0B4FVI7_METAN	unreviewed	Uncharacterized protein (Fragment)	Metarhizium anisopliae ARSEF 549	508	NULL	NULL	NULL	NULL	1 out of 5	NULL	KID69706;	NULL
[truncated: 10,018 more rows]
